# Supplementary material for: A Vaccinology Approach to the Identification and Characterization of Dermanyssus gallinae Candidate Protective Antigens for the Control of Poultry Red Mite Infestations
Source: Vaccines (Basel). 2019 Nov 20;7(4):190. doi: 10.3390/vaccines7040190 (PMC6963798; doi:10.3390/vaccines7040190)
Supplement: Supplementary file 1 [file vaccines-07-00190-s001.xlsx]

## Sheet: PRM proteins
Supplementary table 1: Proteomic results. PRM proteins.
Accession	Description	AAs	MW [kDa]	calc. pI	Σ Proteins	Σ Unique Peptides	Σ Peptides	Σ PSMs	Score FA1	Coverage FA1	Peptides FA1	PSM FA1	Score FA2	Coverage FA2	Peptides FA2	PSM FA2	Score FA3	Coverage FA3	Peptides FA3	PSM FA3	Score UA1	Coverage UA1	Peptides UA1	PSM UA1	Score UA2	Coverage UA2	Peptides UA2	PSM UA2	Score UA3	Coverage UA3	Peptides UA3	PSM UA3	Score FN1	Coverage FN1	Peptides FN1	PSM FN1	Score FN2	Coverage FN2	Peptides FN2	PSM FN2	Score FN3	Coverage FN3	Peptides FN3	PSM FN3	Score UN1	Coverage UN1	Peptides UN1	PSM UN1	Score UN2
isotig11213	vitellogenin 2	1846	209.861	8.42627	1	88	89	2359	583.294	38.24	68	180	630.244	38.79	68	192	690.587	39	67	207	609.243	35.97	63	186	759.599	37.38	66	231	749.386	40.25	72	229	825.285	40.09	69	246	927.578	30.07	51	295	462.538	34.62	57	146	354.818	37.16	60	108	538.673
isotig15430	vitellogenin 2	1838	208.615	8.36768	2	73	77	1311	441.665	38.08	63	138	411.067	37.98	61	126	435.378	35.36	57	133	402.819	32.75	52	123	377.359	33.57	55	116	387.19	35.15	56	120	392.191	35.96	57	119	267.501	25.84	42	93	250.204	28.18	45	79	214.287	28.56	46	69	303.091
A0A0M4FBG8	Vitellogenin-1 OS=Dermanyssus gallinae PE=2 SV=1 - [A0A0M4FBG8_9ACAR]	1845	210.632	8.00146	2	77	80	1626	312.976	27.91	49	99	466.917	29.92	52	140	429.034	31.76	55	133	375.591	32.3	57	124	502.606	31.11	53	152	393.975	30.41	54	126	629.542	31.98	57	195	702.801	25.69	45	222	344.642	29	54	114	289.931	29.27	53	97	366.252
A0A0M4FKP0	Hemelipoglycoprotein-1 OS=Dermanyssus gallinae PE=2 SV=1 - [A0A0M4FKP0_9ACAR]	1579	180.741	7.63525	2	66	66	1007	211.531	30.84	42	68	249.985	28.56	39	79	210.482	27.42	37	66	258.475	31.1	43	82	286.424	33.69	47	88	265.823	32.93	46	86	335.025	38.82	56	101	244.203	30.02	40	86	320.89	34.33	51	104	290.779	34.14	49	91	241.675
isotig15723	PREDICTED: uncharacterized protein LOC100898154	553	62.0225	5.09717	1	10	18	331	84.5204	24.41	14	25	93.9857	22.6	13	29	85.1862	24.77	13	26	81.2709	22.6	13	24	91.5062	24.41	14	28	86.4335	22.6	12	26	112.88	26.58	13	34	141.935	18.99	9	46	57.1712	22.06	12	18	66.3166	26.58	14	21	77.202
isotig18432	78 kda glucose-regulated protein precursor	512	56.3314	5.98584	5	10	18	276	85.8671	33.79	15	26	94.4519	35.55	16	29	81.8062	33.01	15	24	92.3932	35.74	15	28	103.106	35.94	16	31	94.8038	33.4	17	30	68.2134	25.39	10	21	57.823	12.89	5	16	52.007	21.48	8	16	62.1119	21.09	8	19	47.2693
A0A0K8RCY6	Tubulin beta chain OS=Ixodes ricinus PE=2 SV=1 - [A0A0K8RCY6_IXORI]	407	45.0543	5.97314	35	0	17	332	74.4803	37.84	13	24	85.5158	39.56	13	27	85.1011	39.56	13	28	76.6221	39.8	14	24	62.8058	37.1	12	21	86.4948	39.8	14	27	92.7079	44.96	14	29	67.392	17.94	7	24	87.4016	39.8	13	28	118.531	49.63	16	39	80.8151
A0A147B973	Heat shock protein 70 (Fragment) OS=Carios mimon PE=3 SV=1 - [A0A147B973_9ACAR]	655	71.8259	5.8335	25	4	16	239	77.3135	19.69	13	26	71.493	21.37	14	24	69.5541	21.07	12	22	53.6525	20.61	12	19	73.2967	19.69	13	24	78.6209	19.69	13	27	55.2886	17.56	9	17	80.395	13.13	7	25	49.6456	16.34	9	16	40.1317	11.45	6	12	32.9781
A0A0K8RKQ9	Tubulin beta chain OS=Ixodes ricinus PE=2 SV=1 - [A0A0K8RKQ9_IXORI]	422	47.15	5.47803	12	2	16	290	61.2097	31.52	11	19	77.0038	35.31	12	24	71.9024	33.18	11	23	66.8449	36.97	13	21	57.3251	30.81	10	19	74.5461	33.41	12	23	77.7098	38.39	12	24	49.124	15.88	6	18	84.3303	33.41	11	27	104.587	45.02	15	35	75.5431
A0A1E1XB07	Tubulin beta chain OS=Amblyomma aureolatum PE=2 SV=1 - [A0A1E1XB07_9ACAR]	446	49.837	4.91943	2	0	15	273	59.2422	28.03	11	20	71.4387	29.6	11	23	67.6129	29.6	11	23	61.6079	29.82	12	20	45.4318	27.35	10	16	73.847	29.82	12	24	76.9356	34.53	12	25	57.6869	13.68	6	21	62.3753	26.46	10	21	94.0177	38.79	14	32	64.8073
G3MKF9	Tubulin beta chain OS=Amblyomma maculatum PE=2 SV=1 - [G3MKF9_9ACAR]	445	49.815	4.89404	5	0	14	278	58.9304	27.19	10	19	69.5736	28.76	10	22	67.0361	28.76	10	22	64.3699	28.99	11	20	48.1602	26.52	9	16	73.0314	28.99	11	23	86.1791	33.71	11	26	53.9768	12.81	5	19	74.1721	32.81	11	24	102.631	37.98	13	34	69.8902
A0A023FMD9	Tubulin beta chain OS=Amblyomma cajennense PE=2 SV=1 - [A0A023FMD9_9ACAR]	445	49.933	4.89404	3	0	14	273	56.1182	25.39	10	19	67.9248	26.97	10	22	64.8073	26.97	10	22	58.6154	27.19	11	19	42.4711	24.72	9	15	70.647	27.19	11	23	83.9792	31.91	11	26	58.8103	14.83	6	21	68.0319	31.01	11	23	94.828	36.18	13	32	67.5279
A0A1E1XAB0	Tubulin beta chain OS=Amblyomma aureolatum PE=2 SV=1 - [A0A1E1XAB0_9ACAR]	446	49.883	4.89404	9	0	15	258	58.9613	26.46	10	19	64.5044	28.03	10	20	64.9993	28.03	10	21	60.8095	28.25	11	19	45.8338	25.78	9	15	70.6179	28.25	11	22	71.5378	32.96	11	22	52.8533	11.66	5	19	64.708	31.61	11	21	95.7804	37.22	13	32	63.5927
A0A1E1XRM6	Tubulin beta chain OS=Amblyomma sculptum PE=2 SV=1 - [A0A1E1XRM6_9ACAR]	446	49.8491	4.91943	10	0	15	253	56.1492	24.66	10	19	62.8556	26.23	10	20	62.7705	26.23	10	21	55.055	26.46	11	18	40.1446	23.99	9	14	68.2334	26.46	11	22	69.338	31.17	11	22	57.6869	13.68	6	21	58.5679	29.82	11	20	87.9774	35.43	13	30	61.2304
A0A146AZY1	Fructose-bisphosphate aldolase OS=Dermanyssus gallinae PE=3 SV=1 - [A0A146AZY1_9ACAR]	363	39.2953	7.59131	15	17	17	206	68.8623	29.75	13	21	54.2054	26.17	11	17	60.5163	26.72	12	20	56.5385	24.52	10	19	60.3159	27.27	11	19	58	32.78	14	19	78.1448	27.82	12	26	43.2458	22.04	7	14	44.0821	25.34	10	15	44.1363	22.87	9	13	26.7143
A0A0K8R8N9	Putative heat shock protein hsp 90-alpha isoform 1 OS=Ixodes ricinus PE=2 SV=1 - [A0A0K8R8N9_IXORI]	731	84.1834	5.021	5	1	16	190	55.8035	19.29	12	18	66.6244	22.3	14	22	54.7829	18.33	11	18	47.8487	16.55	11	16	71.8819	20.79	14	23	45.2399	13.54	8	14	41.7997	16.55	11	14	38.6966	11.63	7	12	32.6625	13	8	10	31.3796	14.91	9	10	52.1884
isotig05804|erp60	isotig05804|erp60	486	54.5433	6.21436	1	16	16	173	53.1803	25.1	14	19	60.2579	25.1	14	20	48.0395	23.25	13	17	38.5602	18.93	8	13	37.8315	22.63	11	14	33.2303	17.08	8	11	31.5333	18.52	9	11	26.1676	13.58	6	9	28.6819	13.79	6	10	45.0025	18.52	10	16	56.541
A0A131Y3B8	Uncharacterized protein (Fragment) OS=Ixodes ricinus PE=2 SV=1 - [A0A131Y3B8_IXORI]	1845	207.692	5.32568	4	1	3	100	58.2676	1.41	2	22	47.9908	0.76	1	18	43.4024	0.76	1	16	21.3504	0.76	1	8	45.0357	0.76	1	17	29.6886	0.76	1	11	7.80364	0.76	1	3	0	0	0	0	2.73941	0.76	1	1	4.83046	1.36	2	2	0
L7MEG0	Putative heat shock protein (Fragment) OS=Rhipicephalus pulchellus PE=2 SV=1 - [L7MEG0_9ACAR]	763	87.4861	5.13525	7	3	17	192	59.9714	19.4	13	20	60.629	19.4	13	20	46.1571	15.6	10	15	48.3667	13.89	10	16	74.1037	17.96	13	24	55.9025	15.47	10	19	38.181	16.12	10	12	41.8401	11.01	7	13	31.3516	11.01	7	9	34.9216	12.84	8	10	58.1803
S5FZD2	Heat shock protein 90 OS=Neoseiulus cucumeris GN=hsp90 PE=2 SV=1 - [S5FZD2_9ACAR]	713	81.7484	5.18604	2	1	15	200	54.9611	15.57	13	19	50.2846	15.57	12	17	55.8259	14.59	13	19	53.3426	14.73	13	18	51.438	15.71	15	18	50.4732	12.62	10	18	45.3577	13.18	12	15	51.2435	12.76	9	18	36.079	12.9	9	12	38.6128	12.9	10	13	41.0456
isotig18954	PREDICTED: uncharacterized protein LOC100898154	557	62.2095	5.16064	1	7	15	227	55.833	21.36	12	17	59.9062	19.57	11	18	63.7031	17.77	10	19	72.427	19.57	11	22	60.9665	17.77	10	18	65.5469	15.98	9	19	67.3534	18.49	10	20	56.8725	18.85	9	19	45.4801	18.31	10	14	56.6594	22.44	12	17	64.4721
A0A131XQW9	Putative elongation factor 2-like isoform 1 (Fragment) OS=Hyalomma excavatum PE=2 SV=1 - [A0A131XQW9_9ACAR]	836	93.5288	6.80029	17	7	14	166	49.1697	14.59	12	17	48.224	13.64	11	17	56.1082	14.83	12	19	42.2348	11.84	10	15	51.7884	13.52	11	17	59.054	14.71	12	20	36.2921	10.89	8	12	31.318	10.65	8	12	19.7068	8.01	6	7	24.0904	10.05	8	9	19.5515
S5G8N2	Heat shock protein 70 OS=Neoseiulus cucumeris GN=hsp70 PE=2 SV=1 - [S5G8N2_9ACAR]	647	71.5313	5.68115	14	1	9	172	53.7745	18.55	9	17	55.1102	18.55	9	18	46.5696	16.23	8	13	39.6414	17	8	13	52.9178	18.55	9	16	51.8081	16.23	8	17	39.0856	14.53	7	11	67.2803	10.66	5	20	32.4114	10.66	5	9	40.7172	12.98	6	12	31.0452
M9WB33	Heat shock protein 90 OS=Ornithodoros moubata PE=2 SV=1 - [M9WB33_ORNMO]	563	65.6942	5.09717	3	1	15	160	47.458	20.78	10	15	55.7406	22.56	11	18	44.3977	19.36	9	14	40.5564	17.05	9	13	58.8415	20.6	11	18	34.0268	11.19	5	10	36.9192	19.54	10	12	36.5233	13.14	6	11	29.6015	14.92	7	9	31.3957	19.36	9	10	47.6234
isotig06702	PREDICTED: uncharacterized protein LOC100902161	654	72.6451	8.23584	3	20	20	209	53.1399	24.62	12	17	52.0231	22.63	11	16	44.7563	20.95	10	13	58.0376	26.3	13	18	59.6584	26.61	13	19	46.3101	25.38	12	14	52.9922	25.69	13	17	30.943	13	7	12	54.3451	29.51	15	18	68.9161	33.03	17	23	62.6012
A0A1E1XEH1	Tubulin beta chain OS=Amblyomma aureolatum PE=2 SV=1 - [A0A1E1XEH1_9ACAR]	449	50.4153	4.98291	1	0	12	195	42.9896	18.71	8	15	40.9564	20.27	8	13	51.3166	23.39	9	17	48.6663	23.61	10	16	33.2855	21.16	8	12	50.5796	20.49	9	16	50.3307	24.5	9	16	55.5596	10.91	5	20	43.7237	17.15	7	15	58.7719	28.73	11	21	49.6582
S5FY84	Actin 3 OS=Neoseiulus cucumeris PE=2 SV=1 - [S5FY84_9ACAR]	376	41.8178	5.47803	7	1	10	201	39.8848	22.07	7	14	39.8235	22.07	7	14	40.4743	24.73	8	14	54.0423	23.94	8	19	45.8056	26.6	9	16	45.7057	26.6	9	16	58.7682	21.01	7	19	45.088	23.94	8	17	56.0935	21.81	7	20	52.3538	23.67	8	18	34.8051
S5G8M7	Actin 1 OS=Neoseiulus cucumeris PE=2 SV=1 - [S5G8M7_9ACAR]	376	41.8058	5.38916	7	2	10	196	44.8001	19.15	6	15	39.8538	19.15	6	13	41.7516	24.73	8	14	48.8904	23.94	8	17	47.2796	23.67	8	16	39.6478	23.67	8	13	50.848	21.01	7	16	52.5242	23.94	8	19	63.2463	24.73	8	22	51.3943	20.74	7	17	32.3665
Q6X4W3	Actin OS=Haemaphysalis longicornis GN=Act1 PE=2 SV=1 - [Q6X4W3_HAELO]	376	41.7977	5.47803	14	1	11	207	41.5506	26.86	8	15	36.7692	22.61	7	13	37.9203	29.52	9	13	51.9416	25.8	8	18	48.5098	28.46	9	17	47.729	28.46	9	17	56.0976	28.72	9	19	53.3326	24.47	8	20	58.0377	26.6	8	22	52.9324	28.46	9	18	41.989
A0A1R3S3F0	Paramyosin OS=Dermanyssus gallinae GN=Der g 11 PE=2 SV=1 - [A0A1R3S3F0_9ACAR]	874	101.132	5.57959	2	25	34	232	39.9284	14.76	11	15	37.7104	14.3	11	14	31.559	11.56	9	11	66.8814	22.31	16	23	44.6825	19.11	14	16	20.5007	6.29	5	7	138.887	39.36	30	42	65.0052	18.42	15	24	56.4539	23.57	18	20	72.1728	24.83	20	23	52.4127
A0A0H4FNI7	Glutathione S-transferases-1 OS=Dermanyssus gallinae GN=GST-1 PE=2 SV=1 - [A0A0H4FNI7_9ACAR]	244	28.022	5.66846	1	9	9	138	33.2485	27.05	6	13	35.8415	27.05	6	14	35.1937	27.05	6	13	30.5372	31.97	7	10	46.3072	31.97	7	15	40.0931	27.05	6	15	34.2684	29.1	7	10	7.2111	11.89	3	3	40.128	29.1	7	11	37.5998	32.79	8	12	28.7333
A0A1E1X6V0	Putative conserved plasma membrane protein (Fragment) OS=Amblyomma aureolatum PE=2 SV=1 - [A0A1E1X6V0_9ACAR]	365	40.8739	9.51025	1	1	1	95	31.4085	3.84	1	15	18.7864	3.84	1	9	33.7474	3.84	1	16	21.4348	3.84	1	10	37.8461	3.84	1	17	23.7913	3.84	1	11	21.3258	3.84	1	10	2.23064	3.84	1	1	2.18769	3.84	1	1	2.00458	3.84	1	1	4.14203
A0A1E1XAX2	Elongation factor 1-alpha (Fragment) OS=Amblyomma aureolatum PE=2 SV=1 - [A0A1E1XAX2_9ACAR]	469	51.4038	9.08545	57	2	9	144	39.1553	18.98	8	13	36.7149	11.94	5	11	47.1268	16.42	7	14	38.6989	15.35	6	13	32.5222	12.79	5	11	48.4439	16.42	7	15	42.0169	18.12	8	14	37.4298	18.55	8	14	21.335	12.79	5	7	37.247	14.5	6	11	23.7725
Q9BNU4	Elongation factor 1-alpha (Fragment) OS=parasitid 'Pas' PE=2 SV=1 - [Q9BNU4_9ACAR]	377	41.7034	7.91357	43	1	8	148	38.657	14.59	5	13	27.6128	11.67	4	9	39.4611	14.59	5	13	43.8048	18.57	5	14	30.0969	12.47	4	10	40.9903	14.59	5	14	40.1718	16.71	6	14	50.3039	18.83	7	18	20.0282	12.47	4	7	34.358	14.59	5	12	30.6564
B7FDG8	Elongation factor 1 alpha (Fragment) OS=Dermanyssus gallinae GN=ef1alpha PE=4 SV=1 - [B7FDG8_9ACAR]	287	31.5041	6.55127	64	1	8	148	38.657	19.16	5	13	27.6128	15.33	4	9	39.4611	19.16	5	13	41.2965	16.38	4	13	30.0969	16.38	4	10	40.9903	19.16	5	14	42.1987	24.74	7	15	50.3039	24.74	7	18	20.0282	16.38	4	7	34.358	19.16	5	12	30.6564
isotig18487	vitellogenin 1	577	65.3914	7.1665	1	13	15	111	35.7516	17.68	10	13	29.7216	14.9	7	10	33.1193	16.46	8	12	25.7555	11.09	7	9	33.1097	13.34	8	12	48.3405	19.06	10	16	31.7914	13.52	8	11	8.11284	3.64	2	3	13.5409	7.8	5	5	15.6197	7.45	5	6	12.7691
isotig06563	liver carboxylesterase 1-like	565	62.0564	5.5415	2	12	12	151	26.9077	12.21	7	10	31.034	13.63	8	12	30.2794	14.16	8	11	26.2116	18.41	9	10	25.343	13.81	7	9	28.6337	12.74	7	10	41.9836	15.58	9	15	65.9522	18.05	10	26	32.6908	16.64	9	12	26.6989	11.33	6	9	33.6983
B7P8Q5	Hsp70, putative (Fragment) OS=Ixodes scapularis GN=IscW_ISCW017192 PE=3 SV=1 - [B7P8Q5_IXOSC]	668	72.2448	5.60498	7	3	8	101	37.7289	13.62	7	12	36.9335	12.28	6	11	34.4513	10.18	5	10	27.3542	13.62	7	8	30.38	13.02	7	9	34.5479	13.62	7	11	26.6586	11.53	6	9	6.35397	3.89	2	3	16.8221	9.13	5	6	24.839	10.18	5	8	25.9411
A0A0K8RQT4	ATP synthase subunit beta (Fragment) OS=Ixodes ricinus PE=2 SV=1 - [A0A0K8RQT4_IXORI]	532	57.0958	5.2876	7	5	11	129	36.413	19.55	7	11	32.583	19.55	7	11	26.5081	19.55	7	9	24.8853	16.92	6	7	43.4546	22.37	8	14	21.2411	16.17	6	8	42.9591	24.62	9	12	34.1339	15.04	6	13	51.3795	24.06	9	15	45.5916	25.94	10	14	11.5831
isotig18808|calreticulin	isotig18808|calreticulin	412	47.5949	4.64014	30	13	16	112	30.1003	24.27	8	10	31.9635	20.63	7	10	30.1041	18.45	7	10	32.4791	23.54	8	11	42.258	25	10	14	49.7685	27.67	10	15	28.7175	18.69	6	9	8.96108	9.71	3	3	35.8275	18.93	6	11	31.2321	14.08	6	10	12.1277
A0S0Q6	Actin (Fragment) OS=Neoseiulus womersleyi PE=2 SV=1 - [A0S0Q6_9ACAR]	125	14.0579	6.37939	4	1	6	145	28.2308	48.8	5	9	32.2522	48.8	5	11	30.3366	48.8	5	10	36.6911	54.4	6	13	42.9211	54.4	6	15	28.3358	54.4	6	10	29.6896	54.4	6	10	45.3231	48.8	5	17	44.7843	48.8	5	17	31.0538	54.4	6	10	33.3267
isotig16461	PREDICTED: uncharacterized protein LOC100906494	357	39.2659	7.62061	2	8	8	105	37.8811	21.01	6	11	30.0947	18.49	5	9	31.0809	18.49	5	10	33.3747	21.01	7	12	36.7817	18.21	6	12	32.3277	21.01	6	10	32.0201	21.57	6	10	13.4736	7.28	2	5	13.121	11.2	3	5	20.3812	15.69	4	6	22.1917
L7LX08	Putative molecular chaperones mortalin/pbp74/grp75 hsp70 superfamily OS=Rhipicephalus pulchellus PE=2 SV=1 - [L7LX08_9ACAR]	687	74.6093	6.17627	4	1	6	98	32.6553	10.04	5	10	39.0283	10.04	5	11	33.7127	8.01	4	9	38.2701	11.94	6	11	37.1792	9.9	5	10	33.0448	11.94	6	10	23.7557	9.9	5	7	9.73625	3.64	2	3	20.9305	7.57	4	6	28.0894	9.9	5	8	27.0822
A0A131XMK2	Putative heat shock protein cognate 5 OS=Hyalomma excavatum PE=2 SV=1 - [A0A131XMK2_9ACAR]	686	74.6112	6.25244	6	2	7	86	32.6553	10.06	5	10	39.0283	10.06	5	11	33.7127	8.02	4	9	26.5756	10.06	5	8	25.9974	8.02	4	7	32.0466	12.97	6	10	20.4346	8.02	4	6	9.73625	3.64	2	3	12.7222	5.69	3	4	23.9448	8.02	4	7	20.1315
V5HC54	Putative beta-spectrin OS=Ixodes ricinus PE=2 SV=1 - [V5HC54_IXORI]	2417	277.702	5.35107	13	1	13	77	24.3465	3.14	7	9	29.0391	2.77	6	11	26.9417	2.98	6	10	18.5804	1.82	4	7	16.9994	1.37	3	6	19.7925	2.15	4	7	9.86819	1.82	4	4	7.42123	1.37	3	3	8.68411	1.37	3	3	15.9391	2.61	6	6	17.1639
isotig18930	calumenin isoform 2	442	50.8236	4.85596	1	10	10	81	26.1209	14.93	6	9	29.1662	18.78	7	10	29.4506	16.74	6	10	30.0935	17.42	7	11	31.9086	15.38	6	11	34.6374	21.04	8	12	15.2059	11.76	4	5	8.95077	4.75	2	3	3.82499	2.71	1	1	6.80517	2.71	1	2	5.79791
A0A131XHW1	Putative beta-spectrin (Fragment) OS=Hyalomma excavatum PE=2 SV=1 - [A0A131XHW1_9ACAR]	2409	276.735	5.32568	20	3	14	75	25.7492	3.15	7	10	26.7259	2.28	5	10	24.2338	2.24	5	9	21.1319	2.32	5	8	16.9994	1.37	3	6	17.9125	1.91	4	7	9.86819	1.83	4	4	5.41528	0.87	2	2	6.38513	0.87	2	2	15.727	2.66	6	6	17.1639
B7QL71	Heat shock protein, putative (Fragment) OS=Ixodes scapularis GN=IscW_ISCW024910 PE=3 SV=1 - [B7QL71_IXOSC]	613	67.8477	5.8208	21	1	5	124	31.6568	9.14	4	9	33.9287	12.07	5	10	34.4317	12.07	5	9	23.6139	9.14	4	7	31.9844	9.14	4	9	39.4747	9.14	4	12	39.9716	9.14	4	11	62.817	9.14	4	18	29.6818	9.14	4	8	35.2477	9.14	4	10	27.6931
A0A034WZ70	Tubulin alpha chain (Fragment) OS=Rhipicephalus microplus PE=3 SV=1 - [A0A034WZ70_RHIMP]	412	45.7267	5.2749	8	1	11	116	25.9561	14.56	5	9	25.8737	13.35	4	8	31.065	15.78	5	10	14.5428	11.89	4	5	24.5671	13.59	5	8	26.1476	11.89	4	8	51.4873	22.57	7	15	21.4329	15.05	5	8	31.7288	16.99	6	11	41.1666	15.78	5	12	22.0338
A0A131YYR4	Heat shock 70kDa protein 1/8 OS=Rhipicephalus appendiculatus PE=3 SV=1 - [A0A131YYR4_RHIAP]	634	69.9617	5.66846	20	1	6	124	31.6568	8.83	4	9	31.8723	8.83	4	9	32.3743	8.83	4	8	23.6139	8.83	4	7	31.9844	8.83	4	9	39.4747	8.83	4	12	39.9716	8.83	4	11	65.004	11.04	5	19	32.1109	11.2	5	9	35.2477	8.83	4	10	27.6931
B7P453	Tubulin alpha chain OS=Ixodes scapularis GN=IscW_ISCW000908 PE=3 SV=1 - [B7P453_IXOSC]	386	42.744	5.18604	5	2	8	119	30.8359	16.06	5	10	23.1943	8.03	2	7	28.0366	13.73	4	9	15.6307	18.13	5	6	20.4439	16.06	5	7	31.1815	16.06	5	10	42.6336	16.06	5	13	20.275	16.06	5	8	34.7447	15.03	5	12	38.0631	16.06	5	12	19.9857
S5GFP7	Vitellogenin 2 OS=Neoseiulus cucumeris PE=2 SV=1 - [S5GFP7_9ACAR]	1843	211.241	8.66064	1	1	6	148	18.7061	2.6	4	6	25.2298	3.2	5	9	31.9451	2.22	3	9	23.6809	2.22	3	7	58.4216	2.22	3	20	52.7978	2.82	4	19	102.4	1.68	2	35	55.3325	1.68	2	17	38.6388	2.12	3	11	13.9875	2.22	3	4	13.724
A0A0M3R828	Phosphoglycerate dehydrogenase-1 OS=Dermanyssus gallinae PE=2 SV=1 - [A0A0M3R828_9ACAR]	324	34.2158	7.78174	1	13	13	105	27.9218	25	8	9	24.1874	25	8	8	22.4551	19.44	5	7	22.8693	18.21	5	8	27.4641	25	8	9	23.4663	20.99	6	8	29.1211	21.6	7	10	14.4822	12.35	4	5	29.587	25.62	8	10	32.3262	29.01	10	11	24.6561
isotig08006	na+ + atpase alpha-subunit 1	1013	111.862	5.46533	29	9	14	94	17.3243	5.53	4	5	26.1313	9.58	7	8	32.5011	9.48	7	10	22.0517	9.08	6	6	52.354	12.93	9	15	20.2064	7.21	5	6	32.1286	8.69	6	9	4.67438	1.09	1	2	31.9047	9.77	7	9	21.0136	8.59	7	7	17.0609
A0A0K8RHR0	Putative glutamate/leucine/phenylalanine/valine dehydrogenase OS=Ixodes ricinus PE=2 SV=1 - [A0A0K8RHR0_IXORI]	548	61.0269	7.88428	11	4	9	79	19.5672	11.86	5	6	22.9008	11.86	5	8	26.5815	12.04	5	8	27.8686	11.86	5	8	32.7905	13.5	6	11	18.355	12.04	5	6	27.4818	14.05	6	8	10.1977	6.02	3	3	9.06514	6.02	3	3	31.646	17.52	7	10	14.7728
A0A0M4FNR2	Peptidase C1A cysteine proteinase-1 OS=Dermanyssus gallinae PE=2 SV=1 - [A0A0M4FNR2_9ACAR]	549	62.2673	6.06201	2	10	10	90	22.6074	13.3	6	8	21.352	13.3	6	7	17.7957	10.38	5	6	22.0429	10.38	5	8	22.3672	13.3	6	8	25.0933	12.93	6	10	20.7511	10.38	5	7	20.3929	10.38	5	7	17.0892	10.38	5	6	27.4577	11.84	6	10	20.0895
A0A023FKG9	Putative vacuolar h+-atpase v1 sector subunit b OS=Amblyomma cajennense PE=2 SV=1 - [A0A023FKG9_9ACAR]	499	55.1442	5.22412	15	8	8	76	25.8315	13.23	5	8	20.1709	13.23	5	7	19.1357	8.02	3	6	14.4015	7.82	3	5	21.2094	11.02	4	6	24.2821	13.23	5	8	24.6225	16.23	6	8	4.63137	5.01	2	2	20.7923	10.22	4	7	15.8494	10.82	4	5	20.3563
A0A147B7I5	Heat shock protein (Fragment) OS=Carios mimon PE=3 SV=1 - [A0A147B7I5_9ACAR]	518	57.4465	6.27783	10	1	3	106	23.4975	8.3	3	6	28.1474	8.3	3	8	26.7683	8.3	3	6	25.1723	8.3	3	8	29.0289	8.3	3	8	36.9674	8.3	3	11	36.5886	8.3	3	10	61.9764	8.3	3	18	24.4142	6.18	2	6	27.2811	6.18	2	7	19.7493
isotig18820	deoxyribonuclease ii	333	37.1819	9.24658	1	8	8	48	20.4644	19.22	5	7	16.3387	14.41	4	6	19.8753	16.52	4	7	25.7291	24.32	6	9	17.2725	16.52	4	6	16.6519	16.52	4	5	2.30649	3.3	1	1	0	0	0	0	0	0	0	0	10.1602	16.22	4	4	0
A0A023GL84	Putative atpase of the aaa+ class posttranslational modification (Fragment) OS=Amblyomma triste PE=2 SV=1 - [A0A023GL84_9ACAR]	574	63.2606	5.07178	16	2	10	86	16.7824	8.36	5	6	16.4161	9.06	4	6	24.4595	10.98	5	8	15.1461	10.45	5	5	23.2348	10.45	5	7	22.2667	6.27	4	7	34.6802	16.03	8	11	13.9162	8.19	4	5	11.3208	8.36	4	4	35.7718	15.85	7	12	15.8717
A0A131XLY7	Inosine-5'-monophosphate dehydrogenase OS=Hyalomma excavatum PE=2 SV=1 - [A0A131XLY7_9ACAR]	511	54.9534	8.32373	6	2	2	58	17.2187	4.7	2	6	22.5198	4.7	2	8	16.8511	4.7	2	6	19.8108	4.7	2	7	15.4527	4.7	2	5	19.8891	4.7	2	7	5.83333	2.35	1	2	15.5644	4.7	2	6	9.03601	4.7	2	3	3.39056	2.35	1	1	3.29069
A0A131YWT4	Heat shock 70kDa protein 1/8 OS=Rhipicephalus appendiculatus PE=3 SV=1 - [A0A131YWT4_RHIAP]	515	57.11	6.21436	10	1	4	97	26.6921	12.23	4	7	26.1184	9.13	3	7	26.7808	9.13	3	6	20.6927	9.13	3	6	24.9621	9.13	3	6	24.0579	6.21	2	6	28.9433	9.13	3	7	58.1925	9.13	3	16	27.3168	9.13	3	7	32.711	9.13	3	9	26.3295
isotig02860	cathepsin d	381	41.6219	6.97607	3	2	5	94	24.928	9.71	3	8	16.3831	7.09	2	5	19.559	9.71	3	6	17.0617	9.71	3	5	22.3281	9.71	3	7	21.4477	9.71	3	7	22.1271	9.71	3	7	26.5131	12.07	4	10	20.579	12.07	4	7	30.2231	13.12	4	10	35.4249
isotig07112	PREDICTED: uncharacterized protein LOC100903760	127	13.3016	7.62061	3	3	5	88	16.1966	32.28	3	5	22.3032	32.28	3	8	16.8878	32.28	3	6	14.7807	32.28	3	5	14.8276	32.28	3	5	18.6812	32.28	3	6	24.1187	44.88	4	8	14.7978	32.28	3	5	23.3412	32.28	3	8	34.755	45.67	5	12	26.5592
A0A1D2AIJ3	ATP synthase subunit alpha (Fragment) OS=Ornithodoros brasiliensis PE=3 SV=1 - [A0A1D2AIJ3_ORNBR]	515	56.0485	8.96826	25	3	10	63	14.7511	10.87	5	6	17.9135	9.32	4	6	18.5524	9.32	4	7	5.50227	5.05	2	2	17.2227	5.05	2	6	7.94503	7.18	3	3	21.6274	14.76	7	8	7.37233	6.21	3	3	35.1914	17.48	8	12	13.4988	11.46	5	5	6.51233
A0A131XL26	Tubulin alpha chain OS=Hyalomma excavatum PE=2 SV=1 - [A0A131XL26_9ACAR]	449	50.0334	5.51611	7	1	9	62	14.3379	12.69	5	6	14.3478	13.81	5	5	20.0416	13.81	5	7	4.71438	5.12	2	2	12.4114	9.8	4	5	17.8319	10.24	4	6	18.0158	10.91	4	6	2.36774	2	1	1	10.0935	10.24	4	4	21.5322	15.81	6	8	14.3467
G3MN54	Histone H4 OS=Amblyomma maculatum PE=2 SV=1 - [G3MN54_9ACAR]	103	11.3604	11.356	19	5	5	71	19.2742	50.49	5	7	16.5578	50.49	5	6	14.3367	50.49	5	5	14.0797	50.49	5	5	10.7245	38.83	4	4	7.12999	27.18	3	3	15.4664	50.49	5	6	23.3787	50.49	5	9	15.9738	50.49	5	6	13.5597	50.49	5	5	21.0804
G3C8U0	Cathepsin L-1 OS=Dermanyssus gallinae GN=catL-1 PE=2 SV=1 - [G3C8U0_9ACAR]	341	38.59	7.1665	5	5	8	114	20.2466	17.6	5	7	14.4913	7.62	2	5	14.7852	10.56	3	5	24.8295	14.96	4	7	24.1321	19.06	5	7	43.4881	24.93	7	13	48.7057	23.17	6	14	30.7505	13.49	4	10	25.7523	14.66	4	8	40.98	26.1	7	12	38.4344
isotig16593	cathepsin l precursor	335	36.9303	7.35693	1	9	10	83	16.8015	15.82	5	6	15.0872	15.82	5	6	13.8631	11.64	4	5	17.9879	12.84	4	7	11.621	12.84	4	4	12.734	12.84	4	5	19.7043	18.81	6	7	19.5497	11.94	4	8	18.1185	11.64	4	7	35.5693	35.22	10	12	22.5239
A0A023GJM1	Putative multifunctional chaperone ixodes scapularis multifunctional chaperone OS=Amblyomma triste PE=2 SV=1 - [A0A023GJM1_9ACAR]	256	29.2806	4.85596	10	1	7	76	10.8378	11.72	3	4	17.8806	16.02	4	7	14.6147	16.41	4	6	15.792	16.02	4	6	10.9331	11.33	3	4	15.8488	16.02	4	6	13.3041	16.41	4	5	21.4785	11.33	3	8	19.3548	16.02	4	7	19.791	16.02	4	7	18.8559
Q2WBI0	Tropomyosin OS=Dermanyssus gallinae GN=tpm PE=2 SV=1 - [Q2WBI0_9ACAR]	284	32.6544	4.65283	55	8	12	108	15.3856	20.77	5	5	16.9962	21.48	5	6	18.3727	20.77	5	6	15.9511	17.61	4	5	12.7255	17.61	4	4	20.1057	15.85	4	6	51.0695	34.15	11	17	49.0027	25.35	7	17	49.4509	36.27	10	17	19.482	20.77	5	6	28.3998
A0A131YKW8	Uncharacterized protein OS=Rhipicephalus appendiculatus PE=4 SV=1 - [A0A131YKW8_RHIAP]	2521	274.687	6.50732	4	1	3	39	17.2295	1.19	2	4	21.5555	1.19	2	5	30.1356	1.59	3	8	12.1481	1.19	2	3	13.7882	1.59	3	4	20.5628	1.19	2	5	8.7092	1.19	2	2	3.4163	0.52	1	1	4.16366	0.52	1	1	3.73572	0.52	1	1	7.02109
S5FWR8	Heat shock protein 60 OS=Neoseiulus cucumeris GN=hsp60 PE=2 SV=1 - [S5FWR8_9ACAR]	585	62.3134	5.56689	19	8	10	77	11.1342	7.69	4	4	20.9132	9.06	5	7	13.7926	9.06	5	5	19.331	10.43	6	7	22.6844	13.5	6	8	18.9112	9.06	5	7	19.8629	8.55	5	7	27.2363	10.6	6	10	14.6298	7.18	4	5	23.3512	9.57	6	8	21.9652
A0A131XYH9	Putative vacuolar h+-atpase v1 sector subunit a OS=Ixodes ricinus PE=2 SV=1 - [A0A131XYH9_IXORI]	613	67.9846	5.75732	4	3	4	55	9.17988	3.43	2	3	18.7771	8.32	4	7	17.256	6.2	3	6	14.0457	6.2	3	5	29.4814	6.2	3	9	14.7723	8.32	4	5	12.6239	4.73	2	4	2.06583	1.47	1	1	12.6716	4.73	2	4	14.0459	4.73	2	4	11.7503
A0A131XEL2	ATP-citrate synthase OS=Hyalomma excavatum PE=2 SV=1 - [A0A131XEL2_9ACAR]	1086	119.159	7.45947	7	4	5	49	14.5351	2.49	2	5	10.5681	2.49	2	5	16.2538	2.49	2	6	12.8212	3.41	3	5	20.4698	3.41	3	7	15.7111	2.49	2	6	7.51539	2.03	2	3	4.94226	2.03	2	2	5.02525	2.03	2	2	7.84976	2.95	3	3	5.20997
Q0Z7Z5	Heat shock protein 70S (Fragment) OS=Dermacentor variabilis GN=hsp70 PE=2 SV=1 - [Q0Z7Z5_DERVA]	469	51.9616	6.04932	10	1	3	79	21.4249	6.82	2	5	23.9832	6.82	2	6	24.2008	6.82	2	5	20.5005	10.02	3	6	22.4018	6.82	2	5	24.0579	6.82	2	6	26.4681	6.82	2	6	52.9106	6.82	2	14	24.4142	6.82	2	6	27.2811	6.82	2	7	19.7493
A0A1E1X9M5	Putative animal-type fatty acid synthase OS=Amblyomma aureolatum PE=2 SV=1 - [A0A1E1X9M5_9ACAR]	2529	275.279	6.32861	5	1	3	38	17.2295	1.19	2	4	21.5555	1.19	2	5	27.9886	1.19	2	7	12.1481	1.19	2	3	11.5596	1.19	2	3	20.5628	1.19	2	5	8.7092	1.19	2	2	5.53901	0.91	2	2	4.16366	0.51	1	1	3.73572	0.51	1	1	7.02109
L7LUH9	Serine hydroxymethyltransferase OS=Rhipicephalus pulchellus PE=2 SV=1 - [L7LUH9_9ACAR]	520	57.2151	7.6792	24	5	6	53	11.6461	6.15	3	4	9.18529	6.54	3	3	21.7639	10	5	8	9.27132	4.42	2	3	15.3325	10	5	6	22.5832	8.27	4	8	11.9777	8.27	4	4	4.55417	5.96	2	2	11.0165	5.58	3	4	9.15331	6.54	3	3	7.13219
A0A1E1XEP2	Tubulin alpha chain (Fragment) OS=Amblyomma aureolatum PE=2 SV=1 - [A0A1E1XEP2_9ACAR]	446	49.1813	5.50342	8	0	8	58	12.6826	11.88	5	5	11.8249	10.76	4	4	17.4385	13	5	6	4.51249	4.26	2	2	10.727	8.97	4	4	15.2562	9.42	4	5	18.6299	10.09	4	6	6.72259	4.26	2	3	10.8875	9.42	4	4	22.4191	15.02	6	8	14.5433
B7P872	Alpha tubulin, putative OS=Ixodes scapularis GN=IscW_ISCW017473 PE=3 SV=1 - [B7P872_IXOSC]	634	70.5752	5.41455	4	0	8	57	12.6826	8.36	5	5	11.8249	7.57	4	4	17.4385	9.15	5	6	4.51249	3	2	2	10.727	6.31	4	4	15.2562	6.62	4	5	21.9774	7.89	4	6	6.72259	3	2	3	10.8875	6.62	4	4	30.8783	11.36	6	10	9.70659
G3MT42	ATP synthase subunit alpha OS=Amblyomma maculatum PE=2 SV=1 - [G3MT42_9ACAR]	555	59.9615	9.0415	33	1	10	44	15.0468	10.09	5	6	10.9273	5.77	3	4	13.4601	8.47	4	5	2.46729	1.8	1	1	2.72488	1.8	1	1	5.419	3.78	2	2	18.5287	11.53	6	7	7.37233	5.77	3	3	21.9231	14.05	7	8	10.8118	8.47	4	4	3.51721
isotig11467	protein disulfide-isomerase a6-like	450	49.312	6.04932	5	9	9	78	15.538	12.22	4	5	11.2592	13.11	4	4	13.908	13.11	4	5	17.3658	11.56	4	6	19.4956	12.22	4	6	25.6409	18.67	6	10	29.9992	21.33	7	10	24.1359	11.11	4	8	17.165	11.56	4	6	12.2263	12.22	4	4	28.9859
A0A131Y4M7	Putative creatine kinase (Fragment) OS=Ixodes ricinus PE=2 SV=1 - [A0A131Y4M7_IXORI]	355	39.8854	7.13721	7	5	8	88	11.8897	4.79	2	3	18.149	7.89	3	5	23.2184	4.79	2	6	20.6898	7.89	3	6	27.81	7.89	3	8	26.9415	7.89	3	7	36.426	18.31	6	11	17.675	7.89	3	6	25.9962	13.52	5	8	30.6136	17.18	6	10	31.0218
K7N7S4	Elongation factor-I alpha protein (Fragment) OS=Amblyseius largoensis GN=EF-I alpha PE=4 SV=1 - [K7N7S4_9ACAR]	189	20.5406	7.91357	14	1	5	73	15.2933	22.75	4	5	12.4946	16.93	3	4	15.3018	22.75	4	5	13.6338	18.52	3	4	12.2939	18.52	3	4	18.2086	22.75	4	6	30.3093	26.98	5	11	16.5071	26.98	5	6	14.7808	18.52	3	5	17.8304	22.75	4	6	20.0165
isotig06992	adp atp translocase	323	35.4127	9.92041	40	4	9	66	14.694	15.79	5	6	8.68069	9.6	3	4	9.21323	12.07	4	4	2.29809	3.41	1	1	10.2533	8.67	3	4	19.7662	13	4	8	24.1737	15.48	5	10	19.2189	9.91	3	8	19.7698	15.48	5	8	20.9999	20.12	6	8	9.81237
G9NSEKQ02I7RR3	glycerol-3-phosphate dehydrogenase	109	12.1381	7.45947	2	3	3	45	15.3166	12.84	2	4	18.4288	12.84	2	5	18.1457	12.84	2	5	11.4627	12.84	2	3	19.8116	12.84	2	5	20.233	12.84	2	5	25.4565	26.61	3	6	0	0	0	0	13.8427	12.84	2	4	7.23312	12.84	2	2	7.45783
V5HQ19	Citrate synthase (Fragment) OS=Ixodes ricinus PE=2 SV=1 - [V5HQ19_IXORI]	535	59.2655	8.73389	14	4	4	50	13.3954	4.86	2	4	20.4932	4.86	2	6	12.9768	4.86	2	4	7.9388	4.86	2	3	14.912	4.86	2	5	13.9538	4.86	2	4	15.5995	6.73	3	5	11.3642	4.86	2	4	12.7869	4.86	2	4	11.2246	8.97	4	4	15.5241
A0A1P8W259	Heat shock protein (Fragment) OS=Typhlodromus exhilaratus GN=HSP PE=4 SV=1 - [A0A1P8W259_9ACAR]	168	19.5998	4.94482	17	1	5	46	12.6914	12.5	3	5	11.0508	12.5	3	4	13.2033	12.5	3	5	13.6383	12.5	3	5	7.94105	12.5	3	3	7.81074	6.55	2	3	13.7562	18.45	5	5	7.49447	11.31	2	3	8.36669	16.67	3	3	6.36002	16.67	3	3	10.1903
isotig17642	beta-galactosidase precursor	568	64.1511	5.80811	1	13	13	77	13.4295	5.99	3	4	12.1469	8.45	4	4	13.5787	10.21	5	5	4.11089	2.82	2	2	22.3055	11.27	6	8	27.4815	14.61	7	9	30.7702	13.2	6	10	8.71582	6.16	4	4	21.3957	16.55	8	8	29.3586	19.89	9	11	14.2133
isotig06682	lysosomal aspartic protease-like	336	37.0026	5.69385	1	1	6	44	11.2234	13.69	3	3	13.0806	17.26	4	4	16.3228	24.7	6	6	16.2941	17.26	4	5	21.3404	19.94	5	6	20.758	19.94	5	6	10.769	13.69	3	3	0	0	0	0	9.76372	13.69	3	3	16.5475	17.26	4	5	4.07022
A0A146AZZ0	Arginine kinase-like protein OS=Dermanyssus gallinae PE=3 SV=1 - [A0A146AZZ0_9ACAR]	394	44.0766	8.1626	1	4	6	76	11.8897	4.31	2	3	15.8367	4.31	2	4	23.2184	4.31	2	6	16.3826	4.31	2	4	20.9889	4.31	2	5	24.4241	4.31	2	6	26.029	10.91	4	7	15.4339	7.11	3	5	22.9178	11.17	4	6	39.8608	15.99	6	12	29.2271
A0A0M4FEI6	Serpin-2 OS=Dermanyssus gallinae PE=2 SV=1 - [A0A0M4FEI6_9ACAR]	433	48.3744	6.34131	1	9	9	53	16.7471	12.24	5	6	5.5029	5.54	2	2	15.0025	9.47	4	5	14.5181	5.54	2	4	15.3956	11.55	4	5	14.1276	9.47	4	5	14.5181	12.01	4	5	14.9205	7.62	3	5	13.0213	5.54	2	4	10.2086	9.24	4	4	9.39064
isotig24108	succinyl- ligase	295	31.0169	8.32373	3	2	3	36	15.4464	10.85	2	4	14.489	14.58	3	5	12.6939	14.58	3	4	4.38774	5.76	1	1	19.4555	10.85	2	5	21.2757	10.85	2	6	10.4127	10.85	2	3	0	0	0	0	10.6241	10.85	2	3	10.2911	10.85	2	3	6.59738
A0A131XHL2	Putative aicar transformylase/imp cyclohydrolase/methylglyoxal synthase (Fragment) OS=Hyalomma excavatum PE=2 SV=1 - [A0A131XHL2_9ACAR]	605	65.3698	7.95752	16	3	6	55	10.5329	5.79	3	4	13.2057	5.79	3	5	10.3011	7.44	4	4	10.7644	4.46	2	4	9.16944	2.31	1	3	10.4411	5.79	3	4	8.14013	5.29	3	3	19.6676	5.79	3	7	10.4169	5.79	3	4	11.0913	7.11	4	4	12.563
isotig10396	peptidyl-prolyl cis-trans isomerase	214	23.3501	9.27588	1	7	7	35	15.4817	20.56	3	5	7.44952	17.76	3	3	17.7726	12.62	3	5	3.77866	7.01	1	1	0	0	0	0	0	0	0	0	7.23554	12.62	2	2	10.7264	12.62	2	4	3.70649	7.01	1	1	15.047	27.1	4	5	14.2842
A0A023GMY0	Catalase OS=Amblyomma triste PE=2 SV=1 - [A0A023GMY0_9ACAR]	499	57.0764	7.89893	14	3	4	66	12.5742	7.82	3	4	12.3935	7.82	3	4	11.3215	5.61	2	4	23.8434	7.82	3	7	21.293	8.42	4	7	15.4043	7.82	3	5	16.1167	7.82	3	5	18.2909	5.61	2	6	15.5833	5.61	2	5	19.3884	7.82	3	6	11.6715
A0A0H4FKJ9	Glutathione S-transferases-2 OS=Dermanyssus gallinae GN=GST-2 PE=2 SV=1 - [A0A0H4FKJ9_9ACAR]	210	23.7581	6.53662	1	9	9	80	12.3062	21.43	4	4	11.4565	16.67	3	4	10.9131	11.43	2	4	17.6522	22.86	5	6	14.8804	21.43	4	6	12.2444	21.43	4	4	22.6901	30	6	8	39.6548	30	6	14	20.5389	30	6	7	27.4303	34.76	7	10	16.4964
A0A0M5JKD8	Aspartyl proteinase-1 OS=Dermanyssus gallinae PE=2 SV=1 - [A0A0M5JKD8_9ACAR]	388	41.9971	6.63916	2	10	10	95	14.4989	13.92	4	5	9.38095	11.34	3	3	11.1882	10.31	3	4	11.3272	13.92	4	4	13.3974	12.63	4	4	21.6638	19.85	6	7	31.6304	27.32	8	10	20.64	16.49	5	8	37.4637	24.48	7	12	50.7845	28.61	8	14	36.5595
B7P5D8	Paramyosin, putative OS=Ixodes scapularis GN=IscW_ISCW016446 PE=4 SV=1 - [B7P5D8_IXOSC]	857	100.316	5.61768	5	1	11	65	11.3908	2.8	2	4	14.7424	3.97	3	5	9.66092	2.8	2	3	15.2816	5.6	4	5	13.4207	5.13	4	5	12.8485	2.8	2	4	29.7169	11.32	8	10	20.8447	6.07	5	7	15.6497	5.13	4	5	20.8082	6.65	6	7	15.5948
isotig11841	phospholipase b-like 2-like	461	52.2989	6.7124	1	7	7	46	8.32826	6.51	3	3	8.12101	6.51	3	3	16.2149	8.46	4	6	8.50561	6.29	3	3	12.9118	6.51	3	4	14.531	8.46	4	5	20.0051	14.75	6	7	4.56444	4.12	2	2	11.1196	6.72	3	4	5.53743	4.56	2	2	12.2774
isotig16215	adp atp translocase	303	33.3525	9.77393	20	3	8	56	9.442	10.23	3	4	8.68069	10.23	3	4	9.21323	12.87	4	4	2.29809	3.63	1	1	7.75928	6.27	2	3	16.5053	10.23	3	7	17.0573	10.23	3	7	16.9158	10.56	3	7	12.7353	10.23	3	5	18.8855	21.45	6	7	9.51014
A0A147B756	Glutamate mitochondrial like (Fragment) OS=Carios mimon PE=4 SV=1 - [A0A147B756_9ACAR]	280	31.2528	6.90283	3	1	6	38	8.5843	7.5	2	3	12.4434	10.71	3	5	10.9938	11.07	3	4	8.56944	7.5	2	3	15.3246	10.71	3	6	5.60652	7.86	2	2	8.57471	10.71	3	3	4.98178	6.07	2	2	5.11934	6.07	2	2	16.6918	17.5	4	5	4.84128
isotig29230	disulfide isomerase	143	15.7842	5.36377	1	5	5	58	14.1916	28.67	4	5	10.7475	22.38	3	4	8.59944	22.38	3	3	11.5022	28.67	4	4	7.95125	22.38	3	3	8.86399	22.38	3	3	15.0241	28.67	4	6	19.7954	28.67	4	7	17.4033	28.67	4	6	10.183	22.38	3	4	20.3612
A0A0K8RLN8	Putative atp-dependent rna helicase OS=Ixodes ricinus PE=2 SV=1 - [A0A0K8RLN8_IXORI]	421	47.8603	5.23682	10	1	5	43	10.5881	9.74	4	4	9.7407	6.89	3	4	11.1889	10.21	4	4	7.20064	6.89	3	3	4.89006	4.28	2	2	13.7375	10.21	4	5	7.57786	6.89	3	3	15.6429	6.89	3	6	7.82164	6.89	3	3	8.24999	6.89	3	3	5.30722
A0A131XSE3	Putative conserved protein with signal anchor (Fragment) OS=Ixodes ricinus PE=2 SV=1 - [A0A131XSE3_IXORI]	87	10.1604	11.2095	5	1	1	23	10.3141	17.24	1	4	11.688	17.24	1	5	7.54365	17.24	1	3	4.65523	17.24	1	2	4.33453	17.24	1	2	9.04195	17.24	1	4	6.87235	17.24	1	3	0	0	0	0	0	0	0	0	0	0	0	0	0
isotig12125	aldehyde dehydrogenase	482	52.5359	6.88818	1	7	7	39	13.7903	12.45	5	5	11.3903	7.05	3	4	8.58401	6.85	3	3	6.12864	4.77	2	2	0	0	0	0	14.1844	12.45	5	5	11.0608	10.17	4	4	3.66824	2.7	1	1	8.07801	8.09	3	3	14.8497	10.37	4	5	9.74427
A0A131XLH0	Protein disulfide-isomerase OS=Hyalomma excavatum PE=2 SV=1 - [A0A131XLH0_9ACAR]	499	56.7176	5.03369	8	1	2	29	11.9459	4.61	2	4	15.5515	2.4	1	4	11.8432	4.61	2	4	3.52403	2.4	1	1	10.2111	2.4	1	3	3.55961	2.4	1	1	3.4385	2.4	1	1	9.30321	2.4	1	3	6.32254	2.4	1	2	3.55683	2.4	1	1	6.68903
B5B8U1	Histamine release factor OS=Dermanyssus gallinae GN=HRF-1 PE=2 SV=1 - [B5B8U1_9ACAR]	174	19.4345	4.70361	1	7	7	92	12.3836	16.67	2	3	11.6323	21.26	3	4	13.1044	16.67	2	4	33.8905	28.74	4	13	20.582	24.14	3	7	21.5519	21.26	3	7	19.8138	28.74	4	6	2.73505	8.05	1	1	11.9745	24.71	3	4	29.2809	36.78	5	10	49.3886
A0A0M4FLE9	Serpin-1 OS=Dermanyssus gallinae PE=2 SV=1 - [A0A0M4FLE9_9ACAR]	384	42.711	7.47412	1	10	10	71	13.464	14.32	5	5	5.76031	5.21	2	2	10.6772	8.33	3	4	11.5102	8.33	3	4	17.8265	11.2	5	7	29.8749	17.71	7	10	16.0841	13.02	4	6	7.52763	7.81	3	3	25.4866	17.71	7	9	21.1509	13.02	4	7	14.9193
A0A023GGY3	Uncharacterized protein OS=Amblyomma triste PE=2 SV=1 - [A0A023GGY3_9ACAR]	243	27.8949	4.98291	11	1	5	71	12.8919	15.23	4	5	11.2361	8.23	2	4	5.93079	4.12	1	2	16.0516	14.81	4	6	15.3008	18.52	5	6	20.2208	18.52	5	8	8.28607	7.41	2	3	18.1721	14.81	4	7	20.0444	14.81	4	7	19.8618	14.81	4	7	21.6304
A0A131XQI6	Putative moesin/ezrin/radixin protein 1 (Fragment) OS=Ixodes ricinus PE=2 SV=1 - [A0A131XQI6_IXORI]	529	62.5498	5.51611	18	1	7	36	18.7309	8.88	4	6	5.51381	3.97	2	2	8.92539	6.99	3	3	8.76237	6.99	3	3	14.0044	9.07	4	5	25.2952	6.99	4	9	12.0126	8.32	4	4	0	0	0	0	0	0	0	0	0	0	0	0	0
A0A023FH52	Proteasome subunit alpha type (Fragment) OS=Amblyomma cajennense PE=2 SV=1 - [A0A023FH52_9ACAR]	224	24.5172	4.99561	13	3	3	34	10.1744	7.14	1	3	10.5956	7.14	1	3	17.5933	16.96	3	5	15.9039	16.96	3	4	16.8816	16.96	3	5	10.5425	16.96	3	3	6.55335	11.61	2	2	5.16678	4.46	1	2	7.83264	11.61	2	2	3.70745	7.14	1	1	5.59674
isotig07114	PREDICTED: uncharacterized protein LOC100903760	127	13.3176	6.85889	1	1	3	55	5.7528	11.81	1	2	13.0722	11.81	1	5	11.0405	11.81	1	4	10.1129	11.81	1	4	4.77407	11.81	1	2	9.532	11.81	1	3	11.5105	24.41	2	4	6.1499	11.81	1	2	17.1879	11.81	1	6	26.7173	25.2	3	9	19.3885
S5G8C9	Vitellogenin 1 OS=Neoseiulus cucumeris PE=2 SV=1 - [S5G8C9_9ACAR]	1844	211.135	8.104	1	2	5	59	11.4427	0.7	1	3	8.8739	1.57	2	3	15.2402	2.11	3	5	10.4158	0.7	1	3	5.71473	0.7	1	2	7.391	0.7	1	2	24.8555	1.84	3	8	15.5831	1.84	3	5	9.73303	1.14	2	4	20.4225	1.14	2	7	21.8612
A0A023GKQ6	Tubulin alpha chain (Fragment) OS=Amblyomma triste PE=2 SV=1 - [A0A023GKQ6_9ACAR]	326	36.1189	5.8208	2	0	6	36	8.28672	10.74	3	3	9.37465	11.96	3	3	15.1473	15.03	4	5	2.36729	3.07	1	1	8.61465	9.51	3	3	10.983	7.36	2	3	10.8197	7.36	2	3	4.35485	3.07	1	2	5.9437	7.36	2	2	15.2713	11.35	3	5	5.14866
A0A023FLM6	Protein disulfide-isomerase (Fragment) OS=Amblyomma cajennense PE=2 SV=1 - [A0A023FLM6_9ACAR]	466	53.1749	5.49072	19	1	2	29	9.62264	2.58	1	3	17.6779	5.36	2	5	9.78247	2.58	1	3	3.52403	2.58	1	1	10.2111	2.58	1	3	5.5932	5.36	2	2	3.4385	2.58	1	1	9.30321	2.58	1	3	6.32254	2.58	1	2	3.55683	2.58	1	1	6.68903
isotig11248	tick thioester protein	784	88.2584	6.45557	2	15	15	78	9.9326	1.28	1	3	14.1514	5.87	4	5	4.75188	2.68	2	2	18.3118	6.25	4	6	22.6167	7.91	5	8	18.3102	9.57	6	7	27.8018	11.86	9	10	6.63365	2.93	2	3	36.1009	12.63	10	12	22.3162	6.12	4	7	19.5907
A0A023GNW2	Sodium/potassium-transporting ATPase subunit alpha OS=Amblyomma triste PE=2 SV=1 - [A0A023GNW2_9ACAR]	1032	113.971	5.59229	16	1	6	49	10.3589	2.62	2	3	14.4359	4.17	3	4	10.104	3.2	2	3	16.9642	7.56	5	5	31.9683	9.01	6	10	10.6381	3.1	2	3	24.6937	6.2	4	7	0	0	0	0	23.9159	6.49	4	6	6.98522	3	2	2	5.82697
A0A023FHR6	Proteasome subunit alpha type (Fragment) OS=Amblyomma cajennense PE=2 SV=1 - [A0A023FHR6_9ACAR]	239	26.6814	7.1665	13	3	4	47	8.19267	15.06	3	3	8.83282	5.02	1	3	10.3849	8.79	2	4	12.4815	11.3	2	4	13.0534	15.06	3	5	24.137	15.06	3	9	11.8634	15.06	3	4	0	0	0	0	5.331	10.04	2	2	11.2776	11.3	2	4	8.80186
isotig06683	cathepsin d	332	36.7235	6.53662	2	1	6	38	8.58295	9.64	2	2	10.5224	13.25	3	3	14.1938	20.78	5	5	13.7344	13.25	3	4	20.6999	20.18	5	6	17.8137	15.96	4	5	7.45927	9.64	2	2	0	0	0	0	15.6761	13.86	3	5	13.5957	13.25	3	4	4.07022
A0A131Z2K9	Peroxiredoxin (Alkyl hydroperoxide reductase subunit C) OS=Rhipicephalus appendiculatus PE=4 SV=1 - [A0A131Z2K9_RHIAP]	197	22.0961	6.53662	12	2	4	33	14.6944	13.2	3	5	5.23525	13.2	2	2	8.25078	13.2	3	3	8.72765	13.2	2	3	10.2199	13.2	2	4	14.0729	13.2	3	5	5.55394	10.66	2	2	4.763	5.08	1	2	2.93218	5.08	1	1	9.00368	13.2	2	3	6.15457
V5GY25	Clathrin heavy chain OS=Ixodes ricinus PE=2 SV=1 - [V5GY25_IXORI]	1672	190.73	5.80811	11	2	7	38	4.96114	0.66	1	2	12.5795	1.97	3	5	7.88541	1.97	3	3	16.2081	2.03	3	6	10.1762	2.63	4	4	3.28474	0.66	1	1	2.85921	0.66	1	1	5.66142	0.66	1	2	0	0	0	0	12.0045	2.15	3	4	17.673
G3MH24	Uncharacterized protein (Fragment) OS=Amblyomma maculatum PE=2 SV=1 - [G3MH24_9ACAR]	468	52.7243	7.85498	10	5	10	47	5.49752	5.77	2	2	8.08995	7.26	3	3	14.8604	12.18	5	5	5.32839	5.77	2	2	10.6267	5.98	2	3	5.06702	5.77	2	2	30.0243	21.58	9	10	4.43316	3.63	2	2	5.66745	4.27	2	2	10.4563	11.54	4	4	15.5206
G3MKJ6	Uncharacterized protein OS=Amblyomma maculatum PE=2 SV=1 - [G3MKJ6_9ACAR]	421	48.2795	5.56689	13	2	4	31	6.39382	6.41	2	2	8.90931	5.23	2	3	14.6796	8.79	3	5	2.76628	2.85	1	1	2.99674	2.85	1	1	15.9037	8.79	3	5	6.43889	5.23	2	2	7.9552	2.38	1	3	6.0674	5.23	2	2	8.94719	7.36	3	3	7.64458
A0A0C9SDX5	Putative succinyl-coa synthetase alpha subunit (Fragment) OS=Amblyomma americanum PE=2 SV=1 - [A0A0C9SDX5_AMBAM]	305	31.7065	8.88037	16	2	3	21	5.20418	3.93	1	2	14.4685	7.54	2	6	5.33729	7.54	2	2	4.94128	3.93	1	2	6.01068	3.93	1	2	8.6332	3.93	1	3	2.16461	3.93	1	1	0	0	0	0	4.19023	3.93	1	2	0	0	0	0	0
A0A131XZ36	Putative transcription factor tcf-4 OS=Ixodes ricinus PE=2 SV=1 - [A0A131XZ36_IXORI]	622	67.2132	8.66064	3	3	3	19	4.43784	3.54	2	2	9.63261	6.43	3	4	9.47435	3.54	2	4	6.75129	6.43	3	3	2.01979	2.09	1	1	6.77816	3.54	2	3	2.18581	1.45	1	1	0	0	0	0	2.19569	2.89	1	1	0	0	0	0	0
A0A0K8RIT6	Putative cbf/mak21 family OS=Ixodes ricinus PE=2 SV=1 - [A0A0K8RIT6_IXORI]	131	15.0305	4.98291	1	1	1	19	5.00153	9.16	1	2	9.79763	9.16	1	7	2.16514	9.16	1	1	2.70031	9.16	1	1	5.0293	9.16	1	2	9.36557	9.16	1	4	0	0	0	0	0	0	0	0	2.53127	9.16	1	1	0	0	0	0	2.44296
A0A147BDA3	Uncharacterized protein OS=Ixodes ricinus PE=4 SV=1 - [A0A147BDA3_IXORI]	282	28.1752	11.6489	1	2	2	16	4.3432	4.96	1	2	8.57738	6.74	1	5	4.37808	11.7	2	3	4.64975	6.74	1	2	0	0	0	0	2.25806	6.74	1	1	0	0	0	0	2.14464	4.96	1	1	2.0297	4.96	1	1	0	0	0	0	0
A0A0K8R7R0	Putative ixodes 26 kDa salivary protein OS=Ixodes ricinus PE=2 SV=1 - [A0A0K8R7R0_IXORI]	227	26.1733	6.68311	1	2	2	15	8.80631	4.85	2	4	8.01272	4.85	1	3	7.23706	4.85	2	3	2.73294	4.85	1	1	2.01723	4.41	1	1	2.5495	4.85	1	1	0	0	0	0	2.05725	4.41	1	1	0	0	0	0	0	0	0	0	2.50811
isotig09334	legumain-like protease precursor	422	47.0201	9.0708	1	5	8	57	6.63521	5.92	2	2	12.5024	9	3	4	8.7778	9	3	3	10.7025	5.92	2	3	10.0451	8.77	3	5	14.6657	9	3	5	20.7414	17.54	6	7	13.1187	8.53	3	5	4.97969	3.08	1	2	26.5849	15.17	5	8	18.9617
A0A1E1XRY4	Putative 26s proteasome regulatory complex atpase rpt5 (Fragment) OS=Amblyomma sculptum PE=2 SV=1 - [A0A1E1XRY4_9ACAR]	440	49.0485	6.65381	10	1	4	44	7.83704	6.14	2	2	12.9904	9.77	3	4	8.74893	8.86	3	3	17.3978	6.14	2	5	13.4156	6.14	2	4	13.0566	8.86	3	4	10.383	8.86	3	3	8.37879	5.45	2	3	7.56675	2.73	1	3	19.8389	8.86	3	6	8.54196
isotig21684	cathepsin l precursor	342	38.391	6.53662	2	3	7	91	12.5642	7.02	2	4	9.4685	4.09	1	3	6.8096	4.09	1	2	13.4512	7.02	2	4	9.32982	7.02	2	3	13.781	7.02	2	4	44.4074	23.68	6	13	26.0008	15.2	4	9	23.12	11.11	3	7	54.4881	19.59	5	16	45.1255
isotig21760	cathepsin l	341	38.3829	6.17627	2	4	8	81	12.5642	7.04	2	4	9.4685	4.11	1	3	6.8096	4.11	1	2	13.4512	7.04	2	4	9.32982	7.04	2	3	13.781	7.04	2	4	38.8105	19.94	5	12	28.638	14.37	4	10	23.1941	11.14	3	7	31.3097	15.84	4	10	31.7059
A0A147B7R8	T complex protein 1 subunit eta isoform 2 (Fragment) OS=Carios mimon PE=3 SV=1 - [A0A147B7R8_9ACAR]	273	29.7274	6.17627	1	1	4	37	9.19464	9.52	2	3	11.9733	9.52	2	4	5.69379	5.13	1	2	12.5165	9.52	2	4	11.1669	9.52	2	4	9.95015	9.52	2	3	10.5919	8.79	2	4	4.92528	9.52	2	2	15.1498	15.75	3	5	6.10593	9.52	2	2	6.01729
isotig08437	cathepsin l	335	37.062	7.15186	3	6	6	41	7.05263	7.76	2	2	10.5713	7.76	2	3	12.1681	10.75	3	4	9.02313	7.76	2	3	9.69374	4.48	1	3	7.40817	7.76	2	2	19.897	19.1	5	6	5.84963	3.28	1	2	5.63501	7.76	2	2	18.7528	16.12	4	6	13.207
isotig05534	serine threonine-protein phosphatase 2b catalytic subunit 3-like	588	65.9675	7.06396	13	6	6	33	8.70342	6.63	3	3	10.4502	8.33	4	4	5.66337	4.59	2	2	4.39007	3.23	2	2	2.28023	1.53	1	1	11.8929	8.33	4	5	10.1902	5.44	3	4	0	0	0	0	4.66253	3.74	2	2	10.6518	5.44	3	4	4.68987
A0A147B802	Isocitrate dehydrogenase (Fragment) OS=Carios mimon PE=4 SV=1 - [A0A147B802_9ACAR]	363	41.0725	7.10791	3	1	4	36	6.09131	6.06	2	2	7.91472	6.06	2	3	12.3532	6.06	2	4	8.69538	5.79	2	3	3.58789	3.58	1	1	8.03681	8.26	3	3	9.77152	11.85	4	4	8.71615	5.79	2	3	3.239	3.58	1	1	11.1044	8.26	3	4	10.0836
G3MJA6	Uncharacterized protein (Fragment) OS=Amblyomma maculatum PE=2 SV=1 - [G3MJA6_9ACAR]	373	42.8523	8.07471	17	1	4	36	6.09131	5.9	2	2	7.91472	5.9	2	3	12.3532	5.9	2	4	8.69538	5.63	2	3	3.58789	3.49	1	1	8.03681	8.04	3	3	7.42625	8.04	3	3	8.71615	5.63	2	3	3.239	3.49	1	1	13.6037	10.72	4	5	10.0836
A0A131YAG2	Putative ca2+-binding actin-bundling protein (Fragment) OS=Ixodes ricinus PE=2 SV=1 - [A0A131YAG2_IXORI]	889	102.889	6.01123	12	5	7	31	8.38491	3.15	2	3	12.8509	3.26	3	4	6.22096	3.26	2	2	6.27794	3.15	2	2	11.5973	2.81	3	4	2.99715	1.57	1	1	9.67441	4.05	3	3	0	0	0	0	0	0	0	0	8.66982	3.82	3	3	13.941
A0A023GGI9	Putative chromatin remodeling complex rsc subunit rsc1/polybromo (Fragment) OS=Amblyomma triste PE=2 SV=1 - [A0A023GGI9_9ACAR]	888	102.141	5.37646	5	2	2	27	4.07029	1.8	1	2	10.5501	1.8	1	5	4.57309	1.8	1	2	2.23086	1.8	1	1	4.07453	1.8	1	2	6.42794	1.8	1	3	13.6132	1.8	1	6	9.14408	1.8	1	4	2.22761	1.8	1	1	2.0504	1.69	1	1	0
A0A147BFG0	Putative secreted metalloprotease OS=Ixodes ricinus PE=4 SV=1 - [A0A147BFG0_IXORI]	408	45.8928	8.22119	1	1	1	14	4.48322	3.92	1	3	4.73098	3.92	1	4	2.18564	3.92	1	2	0	0	0	0	2.04517	3.92	1	1	5.275	3.92	1	4	0	0	0	0	0	0	0	0	0	0	0	0	0	0	0	0	0
A0A0K8RD11	Putative 26s proteasome regulatory complex atpase rpt4 OS=Ixodes ricinus PE=2 SV=1 - [A0A0K8RD11_IXORI]	404	45.4798	7.02002	17	9	9	45	8.29973	8.42	3	3	6.57028	6.19	2	2	8.66392	6.19	2	3	20.8677	12.38	4	6	15.4388	16.58	6	6	11.9163	11.88	4	4	25.2774	9.16	3	6	5.33033	2.72	1	2	8.24339	5.45	2	3	14.282	6.44	2	4	2.75094
G3MLR1	Uncharacterized protein OS=Amblyomma maculatum PE=2 SV=1 - [G3MLR1_9ACAR]	444	49.4546	6.65381	10	1	4	45	7.83704	6.08	2	2	10.9563	6.08	2	3	8.74893	8.78	3	3	19.8698	10.59	3	6	13.4156	6.08	2	4	15.2775	13.29	4	5	10.383	8.78	3	3	8.37879	5.41	2	3	7.56675	2.7	1	3	19.8389	8.78	3	6	8.54196
A0A023FXG9	Putative aldehyde dehydrogenase (Fragment) OS=Amblyomma parvum PE=2 SV=1 - [A0A023FXG9_9ACAR]	447	48.3897	7.37158	5	2	4	29	12.0103	4.7	2	4	6.08878	4.7	2	2	6.37169	4.7	2	2	10.0797	4.7	2	4	19.0321	7.83	3	7	10.917	4.7	2	4	7.07094	8.28	3	3	0	0	0	0	2.31597	2.24	1	1	2.53304	2.24	1	1	2.5524
V5HD06	Putative methylmalonate semialdehyde dehydrogenase OS=Ixodes ricinus PE=2 SV=1 - [V5HD06_IXORI]	365	39.2339	7.6792	8	1	3	29	12.5275	6.3	2	4	6.29043	6.3	2	2	6.03317	6.3	2	2	9.48862	6.3	2	4	16.1777	10.14	3	6	11.2823	6.3	2	4	2.25096	3.01	1	1	5.4578	3.29	1	2	2.80226	3.29	1	1	3.31335	3.29	1	1	3.31845
A0A146B010	Mitochondrial-processing peptidase subunit beta-like protein OS=Dermanyssus gallinae PE=3 SV=1 - [A0A146B010_9ACAR]	478	53.1826	6.53662	1	11	11	56	18.017	8.16	3	5	5.36693	4.6	2	2	3.00843	2.3	1	1	12.9059	7.95	3	4	9.58359	7.95	3	3	15.474	11.3	5	6	25.9945	14.02	6	8	5.40766	3.97	2	2	5.87961	4.39	2	2	48.3252	20.92	8	15	12.1309
A0A0K8RMJ6	Putative ribosomal protein OS=Ixodes ricinus PE=2 SV=1 - [A0A0K8RMJ6_IXORI]	417	46.5769	11.1948	21	1	3	35	8.31459	6.71	2	3	11.3606	6.71	2	4	3.17285	3.6	1	1	15.0423	6.71	2	5	9.19361	6.71	2	3	9.45099	3.6	1	3	5.63163	3.6	1	2	2.61552	3.6	1	1	2.88457	3.6	1	1	10.9786	3.6	1	4	11.6325
A0A131Z6B0	Tubulin alpha chain OS=Rhipicephalus appendiculatus PE=3 SV=1 - [A0A131Z6B0_RHIAP]	449	49.9287	5.36377	7	0	7	49	7.40742	6.24	3	3	5.99992	5.12	2	2	8.53933	7.35	3	3	4.51249	4.23	2	2	8.69323	7.35	3	3	15.2562	9.35	4	5	18.6299	10.02	4	6	6.72259	4.23	2	3	13.1177	11.14	5	5	22.4191	14.92	6	8	12.4675
A0A0K8RAM4	Putative t-complex protein 1 OS=Ixodes ricinus PE=2 SV=1 - [A0A0K8RAM4_IXORI]	536	57.7931	5.84619	11	2	4	45	5.90288	4.48	2	2	8.1493	4.48	2	3	8.10149	4.48	2	3	9.39615	4.48	2	3	7.9933	4.48	2	3	10.6349	4.48	2	4	10.5877	7.28	3	3	16.1873	6.34	3	5	14.059	4.48	2	4	12.7794	9.14	4	4	17.7333
B7Q5Q7	Ubiquitin/40S ribosomal protein S27A fusion, putative OS=Ixodes scapularis GN=IscW_ISCW010407 PE=4 SV=1 - [B7Q5Q7_IXOSC]	609	68.4789	7.6499	76	2	4	37	9.53294	32.84	2	3	8.68149	32.84	2	3	6.34104	32.84	2	2	8.77049	44.66	3	3	11.3206	44.66	3	4	7.87801	44.66	3	3	8.03406	32.84	2	3	10.6796	32.84	2	4	8.886	32.84	2	3	6.31163	32.84	2	2	8.4399
L7LSD2	Putative chaperonin complex component tcp-1 beta subunit cct2 OS=Rhipicephalus pulchellus PE=2 SV=1 - [L7LSD2_9ACAR]	517	55.9581	5.93506	11	1	3	37	5.90288	4.64	2	2	8.1493	4.64	2	3	8.10149	4.64	2	3	9.39615	4.64	2	3	7.9933	4.64	2	3	10.6349	4.64	2	4	7.34757	4.64	2	2	14.1465	4.64	2	4	14.059	4.64	2	4	10.1334	6.77	3	3	10.2023
L7MAC0	Putative chaperonin chaperonin OS=Rhipicephalus pulchellus PE=2 SV=1 - [L7MAC0_9ACAR]	534	58.0995	5.89697	9	0	4	31	6.49491	2.62	1	2	11.3766	4.87	2	4	5.69379	2.62	1	2	12.3685	4.87	2	4	9.05787	4.87	2	3	9.08804	4.87	2	3	16.175	6.74	3	6	2.07255	2.62	1	1	9.18708	5.81	2	3	2.77989	2.62	1	1	3.71987
isotig10022	probable serine carboxypeptidase cpvl-like	447	50.5096	6.16357	2	6	6	38	8.4269	5.37	2	3	5.59036	5.37	2	2	8.65272	5.37	2	3	15.9185	7.38	3	5	6.65722	3.13	1	2	8.04024	6.94	3	3	11.4395	6.71	3	4	6.43442	4.7	2	2	8.88562	5.15	2	3	8.24338	6.71	3	3	5.71699
isotig08403	cathepsin l-like	337	37.6853	5.99854	1	4	4	45	8.89042	10.98	3	3	7.06242	8.31	2	2	10.2715	8.31	2	3	10.1063	8.31	2	3	6.71507	8.31	2	2	12.2983	10.98	3	4	11.7064	14.24	4	4	11.9934	10.98	3	4	12.6048	10.98	3	4	16.8897	14.24	4	6	16.1171
A0A147B865	Trifunctional purine biosynthetic protein adenosine 3 (Fragment) OS=Carios mimon PE=3 SV=1 - [A0A147B865_9ACAR]	568	61.2737	7.66455	6	2	2	30	12.2504	2.82	1	3	7.24223	2.82	1	2	12.3173	2.82	1	3	11.7178	2.82	1	3	10.9318	2.82	1	3	13.4205	2.82	1	3	8.23593	2.82	1	2	0	0	0	0	10.5426	2.82	1	3	8.3222	2.82	1	2	3.26963
isotig04369	ferritin partial	227	25.329	7.32764	3	5	5	36	12.1382	15.42	3	5	5.26801	9.69	2	2	3.416	5.73	1	1	2.57962	4.85	1	1	10.4804	14.54	3	4	8.1711	16.3	3	3	13.1266	23.35	5	5	2.54956	4.85	1	1	9.84472	10.57	2	4	4.09815	7.05	2	2	10.1811
A0A131XG24	Putative chaperonin chaperonin OS=Hyalomma excavatum PE=2 SV=1 - [A0A131XG24_9ACAR]	549	59.0729	6.49365	12	4	5	31	4.95396	4.01	2	2	7.07647	4.01	2	3	7.74145	3.83	2	3	5.58987	4.01	2	2	9.29709	7.65	4	4	5.40948	4.01	2	2	5.20259	3.83	2	2	2.01096	1.82	1	1	8.64261	5.65	3	4	8.32237	3.83	2	3	5.0093
isotig04565	hydroxysteroid dehydrogenase-like protein 2-like	513	55.1887	8.35303	4	9	9	36	5.99834	2.73	1	2	5.26794	5.26	2	2	9.41139	8.58	3	4	5.30469	4.68	2	2	5.18611	5.26	2	2	7.79829	7.21	3	3	17.1933	8.77	4	6	2.71041	1.95	1	1	10.9647	6.24	3	4	15.4148	10.53	5	6	9.60663
L7M838	Putative gpi ethanolamine phosphate transferase 2 OS=Rhipicephalus pulchellus PE=2 SV=1 - [L7M838_9ACAR]	889	99.0524	7.1665	1	1	1	15	8.22513	1.24	1	3	7.71373	1.24	1	3	5.04006	1.24	1	2	2.54005	1.24	1	1	2.33318	1.24	1	1	11.7882	1.24	1	5	0	0	0	0	0	0	0	0	0	0	0	0	0	0	0	0	0
A0A0K8RRC1	Putative translation initiation factor (Fragment) OS=Ixodes ricinus PE=2 SV=1 - [A0A0K8RRC1_IXORI]	187	20.9253	5.70654	19	3	3	28	11.7335	16.04	2	4	7.53222	16.04	2	2	7.21716	16.04	2	2	5.90891	16.04	2	2	6.76969	16.04	2	2	5.29781	16.04	2	2	13.3245	16.04	3	4	5.34905	6.42	1	2	5.39117	6.42	1	2	6.37664	14.97	2	2	5.25598
B7QHT0	Bhlh transcription factor, putative (Fragment) OS=Ixodes scapularis GN=IscW_ISCW024874 PE=4 SV=1 - [B7QHT0_IXOSC]	125	14.3304	8.5874	100	2	4	25	8.12329	27.2	3	3	2.5032	8.8	1	1	11.2011	27.2	3	4	5.04248	17.6	2	2	4.85722	17.6	2	2	4.95213	17.6	2	2	7.51439	25.6	3	3	2.21627	8.8	1	1	2.60023	8.8	1	1	5.30921	17.6	2	2	4.64006
G9NSEKQ02GXYHA|---NA---	G9NSEKQ02GXYHA|---NA---	136	15.8441	9.90576	1	1	1	18	9.30384	8.82	1	3	8.43501	8.82	1	3	6.08311	8.82	1	2	2.85332	8.82	1	1	8.59704	8.82	1	3	3.16964	8.82	1	1	4.69672	8.82	1	2	2.93832	8.82	1	1	3.20845	8.82	1	1	0	0	0	0	2.56019
B7P1X4	Serine protease, putative OS=Ixodes scapularis GN=IscW_ISCW015718 PE=4 SV=1 - [B7P1X4_IXOSC]	346	38.6581	8.1626	1	1	1	13	2.12094	5.2	1	2	4.3134	5.2	1	4	2.07953	5.2	1	2	0	0	0	0	4.39214	5.2	1	4	2.04443	5.2	1	1	0	0	0	0	0	0	0	0	0	0	0	0	0	0	0	0	0
A0A1E1XMZ4	Uncharacterized protein (Fragment) OS=Amblyomma sculptum PE=2 SV=1 - [A0A1E1XMZ4_9ACAR]	778	83.6899	6.63916	2	1	2	15	6.7569	2.31	1	3	6.8674	2.31	1	3	4.46489	2.31	1	2	2.48464	2.31	1	1	5.14543	2.31	1	2	2.12879	2.31	1	1	4.26659	4.37	2	2	2.09187	2.31	1	1	0	0	0	0	0	0	0	0	0
A0A023FKJ2	Putative aromatic amino acid hydroxylase (Fragment) OS=Amblyomma cajennense PE=2 SV=1 - [A0A023FKJ2_9ACAR]	267	30.3321	5.96045	15	1	2	17	7.63893	6.74	2	3	4.7284	6.74	2	2	7.46392	6.74	2	3	2.47793	3.37	1	1	2.62362	3.37	1	1	4.68695	6.74	2	2	3.03159	3.37	1	1	0	0	0	0	2.77848	3.37	1	1	2.80669	3.37	1	1	0
isotig07293	calcium-transporting atpase sarcoplasmic endoplasmic reticulum type-like	1000	109.516	5.37646	18	8	10	28	7.26405	3.2	3	3	7.46138	3.2	3	3	5.19595	2.8	2	2	2.0428	1	1	1	2.72453	1.2	1	1	2.24369	1	1	1	18.204	6.7	5	6	3.16364	1.2	1	1	0	0	0	0	15.5518	5.6	4	5	5.09018
A0A1E1XHX1	Putative heat shock protein 90 (Fragment) OS=Amblyomma aureolatum PE=2 SV=1 - [A0A1E1XHX1_9ACAR]	711	80.6811	5.36377	1	1	3	17	7.99161	3.66	2	3	5.04552	1.83	1	2	7.81465	3.66	2	3	0	0	0	0	0	0	0	0	5.19097	3.66	2	2	5.10043	3.52	2	2	5.02107	1.69	1	2	2.48689	1.69	1	1	2.03086	1.69	1	1	2.11888
A0A023FIZ8	Putative 26s proteasome regulatory complex atpase rpt5 (Fragment) OS=Amblyomma cajennense PE=2 SV=1 - [A0A023FIZ8_9ACAR]	339	37.5377	5.10986	11	2	6	52	7.96542	10.32	3	3	2.15797	3.24	1	1	7.31738	11.21	3	3	13.6758	17.99	5	5	13.6522	13.57	4	5	16.4879	16.81	5	6	14.4833	13.57	4	5	2.34451	3.54	1	1	12.5203	9.14	3	5	11.7472	7.96	2	4	12.4898
A0A023FZY8	Pyruvate kinase OS=Amblyomma parvum PE=2 SV=1 - [A0A023FZY8_9ACAR]	525	57.7159	6.59521	8	4	8	36	7.23893	4.95	2	3	2.73299	3.05	1	1	6.63443	4.95	2	3	14.2166	9.9	4	6	5.33199	4.38	2	2	9.33091	7.81	3	4	10.4232	9.71	4	4	8.11171	7.43	3	3	9.80228	7.24	4	4	2.33902	2.1	1	1	2.33849
A0A0C9SCX7	Putative gtp-binding adp-ribosylation factor-like protein arl1 OS=Amblyomma americanum PE=2 SV=1 - [A0A0C9SCX7_AMBAM]	181	20.6037	6.58057	13	2	5	46	6.63801	11.6	2	2	6.19641	11.6	2	2	8.91728	11.6	2	3	8.41341	16.02	3	3	12.1648	23.76	4	5	6.27151	13.26	2	2	11.2691	26.52	4	4	17.7613	27.62	4	7	14.8339	27.62	4	5	9.07184	17.68	3	3	16.5357
isotig12641	protein npc2-like protein	153	16.501	8.79248	1	6	8	69	9.21176	9.8	1	2	11.915	18.3	2	3	9.10331	9.8	1	2	17.9336	23.53	3	5	9.22868	9.8	1	2	8.78165	9.8	1	2	16.9782	33.33	4	5	31.0981	29.41	4	10	19.8305	39.22	5	6	30.475	50.33	7	9	41.6169
isotig12642	protein npc2 homolog	142	15.2482	6.99072	1	3	5	50	11.2343	15.49	2	3	9.72377	10.56	1	2	9.10331	10.56	1	2	13.1319	10.56	1	3	11.2683	15.49	2	3	10.9187	15.49	2	3	16.2338	32.39	4	5	20.8831	16.9	2	6	18.137	27.46	3	5	24.849	27.46	3	7	20.0252
A0A023FXZ4	Putative heat shock protein 90 (Fragment) OS=Amblyomma parvum PE=2 SV=1 - [A0A023FXZ4_9ACAR]	823	93.5409	5.12256	14	3	5	40	6.25097	3.16	2	2	9.28498	4.74	3	3	4.51086	2.43	2	2	8.43568	4.13	3	3	11.1969	5.71	4	4	5.96585	3.16	2	2	9.37268	4.13	3	3	14.2125	4.13	3	5	8.86781	3.16	2	3	12.3537	4.13	3	4	12.6321
L7MIJ5	Putative ubiquitin activating enzyme uba1 (Fragment) OS=Rhipicephalus pulchellus PE=2 SV=1 - [L7MIJ5_9ACAR]	1038	115.446	5.63037	12	2	3	25	8.27799	1.93	2	3	7.0038	3.47	3	3	3.22266	1.16	1	1	6.31676	1.93	2	3	8.37274	1.93	2	3	7.85588	1.93	2	3	5.51323	1.16	1	2	4.5226	0.77	1	2	3.15355	1.16	1	1	2.4664	0.77	1	1	2.83112
B7QL97	Succinyl-CoA:3-ketoacid-coenzyme A transferase, putative OS=Ixodes scapularis GN=IscW_ISCW014602 PE=4 SV=1 - [B7QL97_IXOSC]	148	16.2385	6.31592	1	1	3	20	0	0	0	0	7.24742	10.81	1	3	10.2628	10.81	1	4	7.32491	10.81	1	3	9.6778	10.81	1	4	4.78045	10.81	1	2	5.25798	20.95	2	2	4.33431	15.54	2	2	0	0	0	0	0	0	0	0	0
isotig02862	lysosomal aspartic protease	390	42.2152	5.33838	2	3	6	55	8.20014	9.49	3	3	6.01682	6.92	2	2	5.56848	4.87	2	2	8.81066	9.49	3	3	8.89147	9.49	3	3	5.28464	4.87	2	2	9.03517	9.49	3	3	20.5573	9.49	3	8	15.3152	13.85	5	6	21.4172	12.82	4	7	23.1468
A0A023FSB4	Putative vesicle coat protein clathrin heavy chain (Fragment) OS=Amblyomma parvum PE=2 SV=1 - [A0A023FSB4_9ACAR]	1492	171.038	5.65576	18	1	6	32	4.96114	0.74	1	2	7.81067	1.41	2	3	5.18956	1.41	2	2	11.6109	1.47	2	4	8.07228	2.14	3	3	3.28474	0.74	1	1	2.85921	0.74	1	1	5.66142	0.74	1	2	0	0	0	0	12.0045	2.41	3	4	17.673
A0A131YJM8	116 kDa U5 small nuclear ribonucleoprotein component OS=Rhipicephalus appendiculatus PE=4 SV=1 - [A0A131YJM8_RHIAP]	954	107.985	6.18896	10	3	5	30	4.89275	2.31	2	2	4.82866	2.31	2	2	7.26851	2.31	2	3	9.28703	3.56	3	4	2.43158	1.26	1	1	4.97377	2.31	2	2	13.0232	4.82	4	5	2.11552	1.05	1	1	2.32215	1.05	1	1	8.04488	2.2	2	3	2.88728
isotig12317	protein involved in membrane	175	19.9171	7.1958	1	2	2	26	5.09541	12.57	2	2	8.37124	12.57	2	3	5.64007	12.57	2	2	3.17333	6.86	1	1	8.73201	12.57	2	3	5.59886	6.86	1	2	9.81998	12.57	2	3	5.45853	12.57	2	2	5.68506	12.57	2	2	5.10993	12.57	2	2	6.04792
A0A023G028	Putative imp-gmp specific 5'-nucleotidase (Fragment) OS=Amblyomma parvum PE=2 SV=1 - [A0A023G028_9ACAR]	557	64.3881	6.25244	16	1	3	25	5.80902	3.41	2	2	7.84594	3.41	2	3	5.96784	2.15	1	2	2.65778	2.15	1	1	2.05179	1.26	1	1	11.5672	5.92	3	4	6.21409	3.41	2	2	2.14068	1.26	1	1	5.16658	3.41	2	2	7.96997	3.41	2	3	2.15611
A0A131YP86	Exosome complex exonuclease RRP6 OS=Rhipicephalus appendiculatus PE=4 SV=1 - [A0A131YP86_RHIAP]	819	92.2606	6.01123	3	1	1	23	7.2703	1.47	1	3	4.74499	1.47	1	2	4.80609	1.47	1	2	4.83239	1.47	1	2	4.46347	1.47	1	2	4.38142	1.47	1	2	4.58164	1.47	1	2	2.23954	1.47	1	1	4.38396	1.47	1	2	4.67992	1.47	1	2	2.51036
B7P0V1	Myosin, putative OS=Ixodes scapularis GN=IscW_ISCW000137 PE=4 SV=1 - [B7P0V1_IXOSC]	2138	244.373	7.6792	3	4	4	20	2.16332	0.47	1	1	6.41118	1.26	2	3	6.62688	1.26	2	3	2.25573	0.8	1	1	6.62724	1.03	2	3	4.17552	1.03	2	2	2.02633	0.47	1	1	2.00002	0.47	1	1	2.1793	0.47	1	1	4.31685	1.08	2	2	2.20242
isotig13395	PREDICTED: uncharacterized protein LOC100897332	191	21.5477	9.49561	1	3	3	21	3.84273	5.76	1	1	4.87223	10.47	2	2	9.50285	10.47	2	4	0	0	0	0	7.71472	11.52	2	3	8.32662	10.47	2	3	6.20162	11.52	2	2	0	0	0	0	0	0	0	0	5.18423	11.52	2	2	2.41868
A0A023FSP7	Putative secreted protease inhibitor OS=Amblyomma cajennense PE=2 SV=1 - [A0A023FSP7_9ACAR]	115	13.1203	7.25439	1	1	1	19	4.52701	13.04	1	2	7.07431	13.04	1	3	4.18247	13.04	1	2	4.67766	13.04	1	2	6.96767	13.04	1	3	2.0383	13.04	1	1	4.05515	13.04	1	2	0	0	0	0	0	0	0	0	5.10492	13.04	1	2	2.37731
A0A147B9T6	Electron transfer flavoprotein subunit beta (Fragment) OS=Carios mimon PE=4 SV=1 - [A0A147B9T6_9ACAR]	241	26.1621	6.40479	6	1	3	17	6.67056	6.64	1	2	5.77428	11.62	2	2	9.52217	11.62	2	3	8.01852	11.62	2	3	9.28409	10.37	2	3	0	0	0	0	6.71004	6.64	1	2	0	0	0	0	0	0	0	0	2.83983	4.98	1	1	3.49193
A0A023FZD5	Putative 26s proteasome regulatory complex atpase rpt3 (Fragment) OS=Amblyomma parvum PE=2 SV=1 - [A0A023FZD5_9ACAR]	407	46.3749	5.88428	11	5	7	27	2.61393	2.21	1	1	7.41958	5.9	3	3	8.62316	5.9	2	3	5.65499	3.19	1	2	2.88259	2.21	1	1	5.05813	6.63	2	2	4.73932	2.46	2	2	6.35156	2.46	2	3	6.97203	2.46	2	3	4.59424	5.9	2	2	5.07434
A6N9P0	40S ribosomal protein S14 OS=Ornithodoros parkeri PE=2 SV=1 - [A6N9P0_ORNPR]	151	16.1105	10.1841	12	2	3	26	9.71414	25.83	3	4	0	0	0	0	6.96182	25.83	3	3	4.08821	7.28	1	2	4.93279	7.28	1	2	2.61414	7.28	1	1	6.99916	25.83	3	3	4.47914	7.28	1	2	5.39937	7.28	1	2	4.59674	13.91	2	2	2.81605
A0A0K8RHR7	T-complex protein 1 subunit gamma OS=Ixodes ricinus PE=2 SV=1 - [A0A0K8RHR7_IXORI]	553	61.0199	6.49365	12	1	4	21	5.27105	3.62	2	2	7.36026	7.05	3	3	5.24216	3.62	2	2	3.66683	1.99	1	1	7.94833	5.42	2	3	3.18033	1.99	1	1	3.70786	1.99	1	1	0	0	0	0	3.56976	1.99	1	1	5.70254	3.98	2	2	5.00152
Q64KA0	Calreticulin OS=Amblyomma brasiliense PE=3 SV=1 - [Q64KA0_9ACAR]	410	47.2116	4.66553	12	1	4	18	7.13861	8.54	3	3	2.3374	2.2	1	1	6.43112	5.37	2	3	2.054	2.2	1	1	4.9275	5.12	2	2	5.08376	5.12	2	2	4.68544	5.37	2	2	0	0	0	0	0	0	0	0	6.58801	5.37	3	3	2.32494
A0A1E1XH69	Putative mam domain protein (Fragment) OS=Amblyomma aureolatum PE=2 SV=1 - [A0A1E1XH69_9ACAR]	2333	257.123	5.66846	1	2	2	14	6.89034	0.6	2	3	4.70142	0.56	1	2	4.31207	0.6	2	2	4.75538	0.6	2	2	2.10105	0.56	1	1	4.66755	0.56	1	2	0	0	0	0	0	0	0	0	0	0	0	0	0	0	0	0	2.67471
A0A131YJB6	Reprolysin OS=Rhipicephalus appendiculatus PE=4 SV=1 - [A0A131YJB6_RHIAP]	557	63.593	7.88428	2	1	1	27	0	0	0	0	11.1607	2.15	1	5	4.42973	2.15	1	2	2.06058	2.15	1	1	4.11158	2.15	1	2	2.15724	2.15	1	1	2.05934	2.15	1	1	4.20039	2.15	1	2	10.7731	2.15	1	5	4.52607	2.15	1	2	10.8322
A0A1E1XAN5	Putative hsp90 co-chaperone cdc37-like protein (Fragment) OS=Amblyomma aureolatum PE=2 SV=1 - [A0A1E1XAN5_9ACAR]	353	41.419	5.37646	1	1	2	19	6.54106	6.52	2	3	2.00392	3.12	1	1	6.8646	6.52	2	3	4.26262	6.52	2	2	2.30783	3.4	1	1	2.08806	3.4	1	1	4.29912	6.52	2	2	4.18533	3.4	1	2	6.32916	6.52	2	3	0	0	0	0	0
A0A147BA83	Gmp synthase (Fragment) OS=Carios mimon PE=4 SV=1 - [A0A147BA83_9ACAR]	679	75.3127	6.69775	11	3	3	26	3.19184	2.06	1	1	8.49304	4.42	2	3	7.38128	6.04	3	3	2.92126	2.36	1	1	2.37799	2.36	1	1	4.86604	4.42	2	2	12.6398	3.98	2	5	0	0	0	0	0	0	0	0	6.63283	2.36	1	2	8.0886
A0A131XBY4	Putative peroxisomal 3-ketoacyl-coa-thiolase OS=Hyalomma excavatum PE=2 SV=1 - [A0A131XBY4_9ACAR]	406	43.2157	7.56201	2	1	1	16	5.42724	2.71	1	2	6.82254	2.71	1	3	4.78303	2.71	1	2	2.39535	2.71	1	1	5.3893	2.71	1	2	2.22371	2.71	1	1	5.10362	2.71	1	2	0	0	0	0	0	0	0	0	0	0	0	0	0
isotig09527	chymotrypsin-like elastase family member 2a-like	278	30.0332	8.60205	2	4	4	15	8.51229	13.31	3	3	6.24645	9.71	2	2	5.43818	8.27	2	2	2.21473	4.68	1	1	2.83008	4.68	1	1	5.14948	9.71	2	2	2.02429	4.68	1	1	0	0	0	0	0	0	0	0	2.71849	4.68	1	1	6.35669
A0A131YEU0	Nuclear membrane protein involved in mrna transport OS=Rhipicephalus appendiculatus PE=4 SV=1 - [A0A131YEU0_RHIAP]	2001	221.433	5.75732	6	1	3	12	7.32223	2.15	3	3	2.21013	0.85	1	1	6.62327	1.45	2	3	4.46799	0.85	1	2	2.3254	0.85	1	1	2.41836	0.85	1	1	0	0	0	0	0	0	0	0	0	0	0	0	0	0	0	0	2.38383
G3MG89	Uncharacterized protein (Fragment) OS=Amblyomma maculatum PE=2 SV=1 - [G3MG89_9ACAR]	403	43.7796	4.69092	5	2	2	12	2.50499	2.98	1	1	6.65079	6.7	2	3	6.41544	6.7	2	3	2.05333	2.98	1	1	2.53895	2.98	1	1	2.19508	2.98	1	1	4.27149	6.7	2	2	0	0	0	0	0	0	0	0	0	0	0	0	0
B7QF96	Putative uncharacterized protein OS=Ixodes scapularis GN=IscW_ISCW012874 PE=4 SV=1 - [B7QF96_IXOSC]	1203	127.289	11.5171	1	3	4	8	6.88986	3.41	3	3	4.44167	1.91	2	2	4.76727	2.24	2	2	0	0	0	0	0	0	0	0	0	0	0	0	0	0	0	0	0	0	0	0	0	0	0	0	0	0	0	0	0
A0A131Z8U1	Tubulin beta (Fragment) OS=Rhipicephalus appendiculatus PE=4 SV=1 - [A0A131Z8U1_RHIAP]	79	9.17905	4.03076	1	1	2	34	7.90502	27.85	2	3	2.74321	12.66	1	1	5.5953	12.66	1	2	8.1832	27.85	2	3	7.81484	27.85	2	3	10.5831	27.85	2	4	11.3406	27.85	2	4	5.30615	15.19	1	2	11.659	27.85	2	4	8.10083	27.85	2	3	8.3534
A0A0C9RV84	Putative ribosomal protein OS=Amblyomma americanum PE=2 SV=1 - [A0A0C9RV84_AMBAM]	427	47.6614	11.0483	22	2	4	32	6.29216	3.51	1	2	9.09295	3.51	1	3	3.17285	3.51	1	1	14.9074	7.26	2	5	7.09464	3.51	1	2	9.45099	3.51	1	3	5.63163	3.51	1	2	2.61552	3.51	1	1	2.88457	3.51	1	1	10.9786	3.51	1	4	11.6784
V5HX96	Putative lipocalin-2 1 OS=Ixodes ricinus PE=2 SV=1 - [V5HX96_IXORI]	208	23.8065	6.52197	1	1	2	20	6.20163	4.33	1	3	4.16149	4.33	1	2	2.07796	4.33	1	1	6.11651	4.33	1	3	2.03437	4.33	1	1	12.1945	4.33	1	6	2.514	5.77	1	1	2.03971	4.33	1	1	2.01616	4.33	1	1	0	0	0	0	2.05806
G3MG13	Uncharacterized protein (Fragment) OS=Amblyomma maculatum PE=2 SV=1 - [G3MG13_9ACAR]	150	17.1568	6.18896	7	1	5	45	3.03184	7.33	1	1	5.63946	14	2	2	9.26685	14	2	3	6.18399	14	2	2	7.22584	16.67	2	3	5.57327	16	2	2	14.271	34.67	5	5	21.6308	33.33	4	8	18.4662	33.33	4	6	6.67889	16	2	2	14.6046
isotig11485|calreticulin	isotig11485|calreticulin	392	45.3702	4.52588	49	4	7	35	2.15995	2.3	1	1	4.86714	5.61	2	2	6.62689	5.61	2	3	7.86852	5.61	2	3	5.89528	5.36	2	2	5.06284	4.85	2	2	6.18926	5.61	2	2	6.25616	6.63	2	2	15.0885	5.36	2	5	21.5568	14.03	6	8	6.98971
Q9GQG1	Elongation factor-1 alpha (Fragment) OS=Macrodinychus sellnicki PE=4 SV=1 - [Q9GQG1_9ACAR]	190	21.1726	6.80029	3	1	2	27	7.22115	6.32	1	2	6.77438	6.32	1	2	6.86251	6.32	1	2	7.1655	6.32	1	2	7.57324	10.53	2	3	6.54168	6.32	1	2	12.4002	10.53	2	4	3.21116	6.32	1	1	9.20801	10.53	2	3	6.8364	6.32	1	2	6.84189
L7MB06	Putative microtubule-associated protein (Fragment) OS=Rhipicephalus pulchellus PE=2 SV=1 - [L7MB06_9ACAR]	936	100.625	5.77002	2	1	1	20	7.46329	1.71	1	3	2.30416	1.71	1	1	4.61194	1.71	1	2	8.88978	1.71	1	4	4.26925	1.71	1	2	2.26812	1.71	1	1	4.82938	1.71	1	2	0	0	0	0	0	0	0	0	2.24542	1.71	1	1	4.82339
A0A131XCX2	Putative udp-glucose pyrophosphorylase OS=Hyalomma excavatum PE=2 SV=1 - [A0A131XCX2_9ACAR]	501	56.0219	7.85498	13	3	3	18	10.0444	4.79	2	4	2.41195	2.4	1	1	2.79883	2.4	1	1	7.57718	4.79	2	3	7.21364	5.39	2	3	2.437	2.4	1	1	4.5763	2.4	1	2	0	0	0	0	0	0	0	0	7.98297	2.4	1	3	0
isotig22507	cathepsin l	299	32.8841	6.43018	1	4	5	47	12.4566	8.36	2	4	3.51244	5.02	1	1	3.34834	5.02	1	1	13.4553	10.37	2	4	3.41919	5.02	1	1	3.62405	5.02	1	1	20.3897	13.71	3	7	9.85951	5.02	1	3	13.8488	10.37	2	5	29.4838	15.38	3	8	22.4761
A0A131XEH8	Putative polycomb group ring finger protein 2 (Fragment) OS=Hyalomma excavatum PE=2 SV=1 - [A0A131XEH8_9ACAR]	2647	282.616	9.46631	1	2	3	24	5.83697	0.6	1	2	5.16459	0.6	1	2	4.74174	0.6	1	2	7.91964	1.17	2	3	4.90177	1.17	2	2	2.5433	0.6	1	1	7.24842	1.13	2	3	2.10975	0.57	1	1	7.98643	1.17	2	3	5.40484	1.17	2	2	3.27907
isotig01724	enoyl- delta isomerase mitochondrial-like	176	18.7921	6.94678	1	1	1	20	5.49687	6.25	1	2	5.61915	6.25	1	2	4.79913	6.25	1	2	5.0164	6.25	1	2	4.89855	6.25	1	2	4.4244	6.25	1	2	4.61695	6.25	1	2	2.87662	6.25	1	1	3.05056	6.25	1	1	4.51108	6.25	1	2	2.78383
A0A0K8RPX8	Putative metalloprotease (Fragment) OS=Ixodes ricinus PE=2 SV=1 - [A0A0K8RPX8_IXORI]	387	43.6788	5.63037	3	1	1	23	2.09707	2.84	1	1	6.2453	2.84	1	3	4.04486	2.84	1	2	2.05123	2.84	1	1	6.0781	2.84	1	3	4.40955	2.84	1	2	2.00742	2.84	1	1	2.20339	2.84	1	1	2.15334	2.84	1	1	2.11633	2.84	1	1	10.1906
isotig27172	proteasome ( macropain) 26s non- 2	178	19.1292	7.02002	1	1	1	18	11.0654	8.43	1	3	3.90899	8.43	1	1	7.39109	8.43	1	2	6.31022	8.43	1	2	6.8982	8.43	1	2	6.3508	8.43	1	2	4.05396	8.43	1	1	0	0	0	0	2.67293	8.43	1	1	6.6599	8.43	1	2	0
A0A131X9D6	Putative rrna adenine n-6-methyltransferase (Fragment) OS=Hyalomma excavatum PE=2 SV=1 - [A0A131X9D6_9ACAR]	391	43.6136	7.92822	1	1	2	13	0	0	0	0	2.18908	4.09	1	2	6.9216	6.65	2	4	4.76238	4.09	1	3	2.30029	4.09	1	2	2.04327	4.09	1	1	0	0	0	0	0	0	0	0	0	0	0	0	0	0	0	0	2.19912
isotig23855	limbic system-associated membrane	233	24.8178	4.97021	1	2	2	20	3.46609	7.3	1	1	9.27212	11.59	2	3	5.90635	11.59	2	2	3.56445	7.3	1	1	7.01481	7.3	1	2	7.77745	7.3	1	2	9.80457	11.59	2	3	0	0	0	0	10.6865	11.59	2	3	3.86193	7.3	1	1	3.56415
A0A0K8RM20	Proteasome subunit alpha type OS=Ixodes ricinus PE=2 SV=1 - [A0A0K8RM20_IXORI]	262	29.4331	8.25049	9	5	6	25	4.72809	7.25	2	2	4.78994	7.25	2	2	5.24228	7.25	2	2	4.87694	7.25	2	2	2.27208	3.82	1	1	6.39197	9.16	2	2	8.34837	12.21	3	3	2.84163	3.82	1	1	2.60729	3.82	1	1	8.9345	12.21	3	3	9.28586
V5I2R5	Putative rhogap54d (Fragment) OS=Ixodes ricinus PE=2 SV=1 - [V5I2R5_IXORI]	419	47.0117	9.23193	3	1	1	22	4.8649	2.86	1	2	5.00167	2.86	1	2	4.87512	2.86	1	2	4.69682	2.86	1	2	2.13045	2.86	1	1	4.89498	2.86	1	2	5.02788	2.86	1	2	4.88724	2.86	1	2	2.21619	2.86	1	1	4.76559	2.86	1	2	4.78647
A0A0C9RRX6	Histone H2B (Fragment) OS=Amblyomma americanum PE=2 SV=1 - [A0A0C9RRX6_AMBAM]	114	12.76	10.5356	14	2	4	19	12.5949	13.16	1	4	2.15401	7.89	1	1	2.0443	7.89	1	1	8.98435	13.16	1	4	3.4206	13.16	1	1	0	0	0	0	8.82522	13.16	1	3	0	0	0	0	0	0	0	0	8.3084	21.05	2	4	2.01126
A0A023FMD0	Uncharacterized protein (Fragment) OS=Amblyomma cajennense PE=2 SV=1 - [A0A023FMD0_9ACAR]	842	92.2052	6.02393	4	4	4	13	2.14862	1.19	1	1	7.62756	2.61	2	3	4.40231	1.19	1	2	0	0	0	0	2.24478	1.07	1	1	8.79655	2.38	3	4	2.25783	1.19	1	1	0	0	0	0	0	0	0	0	0	0	0	0	0
A0A0K8RCB1	Putative enolase OS=Ixodes ricinus PE=2 SV=1 - [A0A0K8RCB1_IXORI]	433	47.1149	6.01123	7	1	3	20	7.31922	6	2	3	8.86379	2.31	1	3	0	0	0	0	5.64226	2.31	1	2	5.54813	2.31	1	2	0	0	0	0	2.7216	2.31	1	1	7.68897	2.31	1	3	4.29263	2.31	1	2	2.59351	2.31	1	1	5.24679
A0A131YWN9	Filamin OS=Rhipicephalus appendiculatus PE=4 SV=1 - [A0A131YWN9_RHIAP]	2208	237.976	7.35693	16	4	4	20	8.84072	1.09	2	3	6.09212	0.54	1	2	3.29893	0.54	1	1	7.15635	1.31	2	2	3.01464	0.54	1	1	2.8021	0.54	1	1	3.46941	0.54	1	1	5.41955	0.54	1	2	5.94694	0.54	1	2	7.04522	1.13	2	2	6.9286
isotig16330	PREDICTED: uncharacterized protein LOC100903807	203	21.2825	7.88428	1	1	1	12	7.08808	7.39	1	2	8.04904	7.39	1	2	6.91164	7.39	1	2	7.48623	7.39	1	2	3.9104	7.39	1	1	3.1613	7.39	1	1	0	0	0	0	0	0	0	0	0	0	0	0	0	0	0	0	0
G9NSEKQ01CKEQL	citrate mitochondrial	134	14.769	6.52197	1	2	2	23	4.4023	7.46	1	2	5.33702	7.46	1	2	5.00943	7.46	1	2	2.6343	7.46	1	1	2.65408	7.46	1	1	3.10558	7.46	1	1	5.82088	7.46	1	2	7.20473	7.46	1	3	9.56535	13.43	2	4	5.0879	7.46	1	2	3.14009
A0A090XF29	Uncharacterized protein (Fragment) OS=Ixodes ricinus PE=2 SV=1 - [A0A090XF29_IXORI]	255	28.7805	8.646	1	1	1	15	6.48629	5.88	1	3	2.15373	5.88	1	1	5.0904	5.88	1	2	2.10647	5.88	1	1	4.71844	5.88	1	2	0	0	0	0	7.25712	5.88	1	3	2.38693	5.88	1	1	0	0	0	0	0	0	0	0	2.50596
E5D583	ATAQ protein OS=Haemaphysalis elliptica PE=2 SV=1 - [E5D583_9ACAR]	597	65.5587	5.65576	1	1	1	14	2.33836	2.51	1	1	5.23779	2.51	1	2	7.66029	2.51	1	3	2.32674	2.51	1	1	2.92094	2.51	1	1	2.30458	2.51	1	1	4.9898	2.51	1	2	2.33979	2.51	1	1	0	0	0	0	2.35788	2.51	1	1	0
A0A0K8RPJ5	Lysine--tRNA ligase (Fragment) OS=Ixodes ricinus PE=2 SV=1 - [A0A0K8RPJ5_IXORI]	561	63.4627	6.50732	8	2	3	15	6.56753	4.1	2	2	7.59321	2.85	1	2	7.4512	2.85	1	2	0	0	0	0	3.66447	2.85	1	1	6.41788	4.1	2	2	6.49082	4.1	2	2	0	0	0	0	0	0	0	0	2.15477	1.25	1	1	4.13023
A0A147B720	Sorting nexin 6 (Fragment) OS=Carios mimon PE=4 SV=1 - [A0A147B720_9ACAR]	328	38.2025	6.91748	1	1	1	11	2.62549	4.88	1	1	4.40438	4.88	1	2	7.13264	4.88	1	3	2.00381	4.88	1	1	0	0	0	0	4.40112	4.88	1	2	4.45318	4.88	1	2	0	0	0	0	0	0	0	0	0	0	0	0	0
A0A0K8RHP8	Putative ixodes 10 kDa peptide protein OS=Ixodes ricinus PE=2 SV=1 - [A0A0K8RHP8_IXORI]	140	16.113	6.87354	1	1	1	9	2.26495	8.57	1	1	4.48908	8.57	1	2	6.28445	8.57	1	3	2.01845	8.57	1	1	2.07769	8.57	1	1	2.14114	8.57	1	1	0	0	0	0	0	0	0	0	0	0	0	0	0	0	0	0	0
A0A0K8RA98	Putative acyl-coa synthetase OS=Ixodes ricinus PE=2 SV=1 - [A0A0K8RA98_IXORI]	531	58.6391	6.55127	1	1	1	8	4.38118	3.01	1	2	6.76077	3.01	1	3	2.05591	3.01	1	1	2.12837	3.01	1	1	2.24008	3.01	1	1	0	0	0	0	0	0	0	0	0	0	0	0	0	0	0	0	0	0	0	0	0
A0A131Y907	Putative tumor necrosis factor receptor (Fragment) OS=Ixodes ricinus PE=2 SV=1 - [A0A131Y907_IXORI]	99	11.2716	7.37158	3	1	1	8	2.67155	17.17	1	1	4.78019	17.17	1	2	6.71259	17.17	1	3	0	0	0	0	0	0	0	0	4.66626	17.17	1	2	0	0	0	0	0	0	0	0	0	0	0	0	0	0	0	0	0
isotig19758	cathepsin d	391	43.4409	6.93213	1	8	8	60	7.61581	7.67	2	2	5.42489	4.6	1	1	8.13011	7.67	2	2	18.601	14.07	4	5	10.3088	11.25	3	3	18.2837	12.53	3	5	26.7045	17.9	5	8	20.3935	13.55	4	7	29.2877	17.9	5	9	24.1969	23.02	7	8	9.89214
isotig06317	thioredoxin peroxidase	254	28.1605	7.45947	21	3	5	32	2.42642	3.94	1	1	5.54153	9.45	2	2	5.1377	9.45	2	2	9.4444	9.45	2	4	9.92754	14.17	3	4	13.5453	14.17	3	5	8.07168	13.78	3	3	4.763	3.94	1	2	2.93218	3.94	1	1	10.238	7.87	2	4	6.21617
A0A131XC02	Putative 26s proteasome regulatory complex atpase rpt2 OS=Hyalomma excavatum PE=2 SV=1 - [A0A131XC02_9ACAR]	398	44.7387	8.51416	16	5	6	31	6.60284	3.52	1	2	2.23254	3.52	1	1	4.91201	6.53	2	2	9.96722	5.78	2	4	8.85119	7.04	2	3	14.7287	12.81	4	5	5.53418	6.53	2	2	2.34451	3.02	1	1	7.56675	3.02	1	3	8.27882	3.02	1	3	4.66048
B6V3B5	Glutathione peroxidase OS=Ixodes ricinus PE=2 SV=1 - [B6V3B5_IXORI]	221	24.5345	6.12549	7	1	3	33	5.11028	4.98	1	2	5.37926	4.98	1	2	2.84921	4.98	1	1	8.34714	4.98	1	3	10.8474	8.14	2	4	10.6753	4.98	1	4	14.9839	14.03	3	6	2.47293	4.98	1	1	4.96307	4.98	1	2	6.0836	10.86	2	2	7.57503
A6NA14	Truncated peroxiredoxin (Fragment) OS=Ornithodoros parkeri PE=2 SV=1 - [A6NA14_ORNPR]	191	20.9559	6.07471	20	1	3	29	5.11028	5.76	1	2	5.37926	5.76	1	2	2.84921	5.76	1	1	8.34714	5.76	1	3	10.8474	9.42	2	4	10.6753	5.76	1	4	9.49268	9.42	2	4	2.47293	5.76	1	1	4.96307	5.76	1	2	4.6073	10.47	2	2	4.50628
F0J8W9	Enoyl-CoA hydratase (Fragment) OS=Amblyomma variegatum PE=2 SV=1 - [F0J8W9_AMBVA]	202	21.23	7.79639	10	2	2	21	6.78696	9.41	1	2	2.93924	9.41	1	1	7.60709	9.41	1	2	7.58572	9.41	1	2	6.54882	9.41	1	2	18.8915	9.41	1	6	6.13681	17.82	2	2	0	0	0	0	3.1608	9.41	1	1	7.16972	9.41	1	2	3.49951
isotig09614	ganglioside-induced differentiation-associated protein 1-like	309	34.7242	7.76709	2	5	5	41	5.69379	9.39	2	2	7.05481	9.39	2	2	5.47921	5.5	1	1	11.9551	9.39	2	3	12.8156	9.39	2	3	10.2337	9.39	2	3	15.9957	14.24	3	4	12.4147	7.77	2	4	9.55353	9.39	2	3	21.4766	22.33	5	7	10.4412
G3MP67	Uncharacterized protein OS=Amblyomma maculatum PE=2 SV=1 - [G3MP67_9ACAR]	150	16.3507	10.5503	5	1	2	29	8.15011	16	2	3	0	0	0	0	5.01385	16	2	2	6.80829	16	2	3	7.30338	16	2	3	5.2537	16	2	2	4.53694	16	2	2	6.78708	16	2	3	8.06303	16	2	3	4.77033	16	2	2	5.63705
D4P967	Enolase OS=Ornithodoros moubata PE=2 SV=1 - [D4P967_ORNMO]	433	46.9292	7.12256	4	4	5	28	6.31132	5.54	2	2	6.81183	5.54	2	2	2.69774	3.23	1	1	5.70385	5.54	2	2	8.68274	5.54	2	3	8.27134	7.39	3	3	6.67373	5.54	2	2	0	0	0	0	8.47748	5.54	2	3	9.9037	5.54	2	3	8.9816
A0A147B810	Urocanate hydratase like (Fragment) OS=Carios mimon PE=4 SV=1 - [A0A147B810_9ACAR]	379	42.4893	6.354	1	1	1	19	10.6836	3.43	1	4	3.07046	3.43	1	1	0	0	0	0	8.28775	3.43	1	3	9.36029	3.43	1	3	6.84389	3.43	1	2	2.82513	3.43	1	1	3.80119	3.43	1	1	3.65761	3.43	1	1	3.98317	3.43	1	1	2.94349
A0A131YGV3	Choline dehydrogenase OS=Rhipicephalus appendiculatus PE=4 SV=1 - [A0A131YGV3_RHIAP]	312	34.9733	9.24658	1	1	1	13	5.16906	4.17	1	2	7.8965	4.17	1	3	0	0	0	0	7.56499	4.17	1	3	5.12168	4.17	1	2	7.46737	4.17	1	3	0	0	0	0	0	0	0	0	0	0	0	0	0	0	0	0	0
A0A147BLR9	Uncharacterized protein (Fragment) OS=Ixodes ricinus PE=4 SV=1 - [A0A147BLR9_IXORI]	104	11.9158	6.1001	1	1	1	13	2.3456	12.5	1	2	2.46195	12.5	1	2	2.24526	12.5	1	1	4.51703	12.5	1	4	2.40426	12.5	1	2	2.3515	12.5	1	2	0	0	0	0	0	0	0	0	0	0	0	0	0	0	0	0	0
isotig18726|---NA---	isotig18726|---NA---	316	35.1939	7.6499	1	5	5	28	3.48509	5.06	1	1	6.58685	5.06	1	2	7.11955	5.06	1	2	3.21408	4.43	1	1	6.86584	9.49	2	2	11.5351	9.49	2	4	19.8697	17.41	4	6	6.56332	4.43	1	2	8.75083	7.28	2	3	7.29757	4.43	1	2	3.73783
B7Q8W6	Alkyl hydroperoxide reductase, thiol specific antioxidant, putative OS=Ixodes scapularis GN=IscW_ISCW010532 PE=4 SV=1 - [B7Q8W6_IXOSC]	221	24.9026	8.1626	3	1	2	19	2.42642	4.52	1	1	5.2646	10.41	2	2	5.15755	10.41	2	2	4.69772	4.52	1	2	7.81936	10.41	2	3	4.84229	4.52	1	2	3.19191	4.52	1	1	4.763	4.52	1	2	2.93218	4.52	1	1	6.04347	4.52	1	2	3.54328
A0A147BMT5	Putative tick transposon (Fragment) OS=Ixodes ricinus PE=4 SV=1 - [A0A147BMT5_IXORI]	145	16.486	6.69775	1	1	1	16	7.01926	11.72	1	4	2.03595	11.72	1	1	0	0	0	0	5.19665	11.72	1	2	6.83694	11.72	1	4	2.03392	11.72	1	1	4.31094	11.72	1	2	0	0	0	0	4.26904	11.72	1	2	0	0	0	0	0
A0A023GMG8	Putative translation initiation factor 2 gamma subunit OS=Amblyomma triste PE=2 SV=1 - [A0A023GMG8_9ACAR]	456	49.9838	8.83643	15	3	3	23	5.80844	5.04	2	2	3.91493	3.07	1	1	4.94147	5.04	2	2	9.06383	5.04	2	3	6.03712	3.07	1	2	6.8874	3.07	1	2	5.37712	5.04	2	2	0	0	0	0	0	0	0	0	6.55783	3.07	1	2	9.95061
B7Q5H0	Putative uncharacterized protein OS=Ixodes scapularis GN=IscW_ISCW010334 PE=3 SV=1 - [B7Q5H0_IXOSC]	423	46.0519	5.18604	3	1	2	13	2.45056	3.78	1	1	0	0	0	0	4.29897	7.33	2	4	2.12436	3.78	1	1	2.31229	3.78	1	1	4.61996	3.78	1	5	2.12177	3.78	1	1	0	0	0	0	0	0	0	0	0	0	0	0	0
A0A0H4FPP8	Glutathione S-transferases-3 OS=Dermanyssus gallinae GN=GST-3 PE=2 SV=1 - [A0A0H4FPP8_9ACAR]	222	25.757	5.2876	31	8	8	35	4.79879	7.21	2	2	2.2997	4.05	1	1	4.76319	7.66	2	2	4.9351	7.66	2	2	4.84329	7.66	2	2	4.92278	7.66	2	2	11.3397	21.62	5	5	7.6383	12.61	3	3	5.22556	7.66	2	2	11.82	17.57	4	4	15.4547
isotig16123	cathepsin l	324	35.4834	7.41553	2	7	8	46	5.81171	7.72	2	2	5.2436	3.4	1	2	3.10897	3.4	1	1	10.937	7.41	2	3	9.0102	7.72	3	3	0	0	0	0	13.8484	12.96	3	4	0	0	0	0	13.4633	8.64	2	4	25.6938	17.59	5	8	21.6889
A0A131Y3W1	Putative ras-related protein (Fragment) OS=Ixodes ricinus PE=2 SV=1 - [A0A131Y3W1_IXORI]	135	15.4559	5.31299	108	1	3	23	5.43527	16.3	2	2	2.5032	8.15	1	1	5.34313	16.3	2	2	5.04248	16.3	2	2	4.85722	16.3	2	2	4.95213	16.3	2	2	5.3928	16.3	2	2	2.21627	8.15	1	1	2.60023	8.15	1	1	5.30921	16.3	2	2	6.95851
L7LX93	Putative tick transposon OS=Rhipicephalus pulchellus PE=2 SV=1 - [L7LX93_9ACAR]	1593	182.329	9.15869	1	2	3	15	6.09674	2.32	3	3	0	0	0	0	4.15113	1.69	2	2	2.35988	1	1	1	4.11185	1.69	2	2	6.47813	1	1	3	8.98371	1	1	4	0	0	0	0	0	0	0	0	0	0	0	0	0
A0A131XL33	Putative electron transfer flavoprotein alpha subunit OS=Hyalomma excavatum PE=2 SV=1 - [A0A131XL33_9ACAR]	340	35.4298	8.36768	11	3	3	18	3.34238	5.59	1	1	3.61826	5.59	1	1	9.85475	5.59	1	3	5.81534	8.24	2	2	4.47986	5.59	1	1	11.7647	5.59	1	3	6.22612	10.59	2	2	0	0	0	0	3.50913	5.59	1	1	8.19283	5.59	1	2	4.26478
A0A131XZI0	Putative myosin class ii heavy chain OS=Ixodes ricinus PE=2 SV=1 - [A0A131XZI0_IXORI]	2855	317.909	5.07178	2	1	2	15	4.89569	1.09	2	2	2.02229	0.46	1	1	4.75331	0.63	1	2	6.76248	0.63	1	3	2.35636	0.63	1	1	4.35234	0.63	1	2	6.62611	1.09	2	3	0	0	0	0	0	0	0	0	2.54051	0.63	1	1	0
B7PQP3	T-cell immunomodulatory protein, putative (Fragment) OS=Ixodes scapularis GN=IscW_ISCW006297 PE=4 SV=1 - [B7PQP3_IXOSC]	606	66.9847	6.58057	2	1	1	13	2.35879	2.81	1	1	0	0	0	0	4.95962	2.81	1	4	2.92856	2.81	1	2	3.08478	2.81	1	2	2.63369	2.81	1	2	2.74112	2.81	1	2	0	0	0	0	0	0	0	0	0	0	0	0	0
A0A023G4S4	Putative secreted protein OS=Amblyomma triste PE=2 SV=1 - [A0A023G4S4_9ACAR]	139	14.7565	11.0337	3	1	1	13	4.90851	10.07	1	2	2.60996	10.07	1	1	4.88238	10.07	1	2	4.80426	10.07	1	2	4.554	10.07	1	2	4.44287	10.07	1	2	2.31496	10.07	1	1	0	0	0	0	0	0	0	0	2.46751	10.07	1	1	0
A0A131YPU9	Mucin OS=Rhipicephalus appendiculatus PE=4 SV=1 - [A0A131YPU9_RHIAP]	450	49.4758	9.59814	1	1	1	11	7.12882	2.67	1	3	4.05715	2.67	1	2	0	0	0	0	4.29413	2.67	1	2	4.07385	2.67	1	2	4.49581	2.67	1	2	0	0	0	0	0	0	0	0	0	0	0	0	0	0	0	0	0
Q4PM75	Cytochrome c OS=Ixodes scapularis PE=2 SV=1 - [Q4PM75_IXOSC]	109	12.0613	9.56885	4	3	3	26	6.34711	12.84	1	2	2.88889	12.84	1	1	5.91569	12.84	1	2	10.0536	12.84	1	3	3.1857	12.84	1	1	2.46115	12.84	1	1	19.0343	13.76	2	5	3.11487	12.84	1	1	7.12815	13.76	2	2	13.7086	23.85	3	4	6.41929
M4H007	Paramyosin (Fragment) OS=Antricola delacruzi PE=2 SV=1 - [M4H007_ANTDE]	246	28.444	6.45557	2	1	3	19	7.89763	9.76	2	3	3.63922	5.28	1	1	3.4681	5.28	1	1	6.94881	5.28	1	2	3.33003	5.28	1	1	6.84483	5.28	1	2	3.31004	5.28	1	1	9.29935	8.54	2	3	7.30483	5.28	1	2	4.04859	5.28	1	1	3.86529
B7Q3E7	Protein pellino, putative (Fragment) OS=Ixodes scapularis GN=IscW_ISCW009827 PE=4 SV=1 - [B7Q3E7_IXOSC]	391	43.3002	9.15869	2	1	1	14	2.18183	3.84	1	1	2.71559	3.84	1	1	6.40769	3.84	1	3	2.00086	3.84	1	1	4.58761	3.84	1	2	4.48069	3.84	1	2	0	0	0	0	6.90359	3.84	1	3	0	0	0	0	0	0	0	0	2.25892
A0A131XL69	Putative electron transfer flavoprotein beta subunit OS=Hyalomma excavatum PE=2 SV=1 - [A0A131XL69_9ACAR]	254	27.5509	7.38623	8	1	3	13	6.67056	6.3	1	2	2.99162	6.3	1	1	6.64561	6.3	1	2	5.68151	6.3	1	2	9.28409	9.84	2	3	0	0	0	0	6.71004	6.3	1	2	2.20261	4.72	1	1	0	0	0	0	0	0	0	0	0
A0A131YX63	Adenylosuccinate lyase OS=Rhipicephalus appendiculatus PE=3 SV=1 - [A0A131YX63_RHIAP]	478	54.1827	7.32764	8	1	2	10	6.62803	6.07	2	3	2.85182	2.3	1	1	2.12064	3.77	1	1	0	0	0	0	7.04379	2.3	1	3	5.13876	2.3	1	2	0	0	0	0	0	0	0	0	0	0	0	0	0	0	0	0	0
A0A131XY96	Putative animal-type fatty acid synthase (Fragment) OS=Ixodes ricinus PE=2 SV=1 - [A0A131XY96_IXORI]	1423	155.042	6.68311	3	2	3	16	3.95197	0.91	1	1	3.80079	0.91	1	1	9.1387	2.04	2	3	3.30167	0.91	1	1	5.97249	1.97	2	2	4.05556	0.91	1	1	4.11091	0.91	1	1	3.4163	0.91	1	1	4.16366	0.91	1	1	3.73572	0.91	1	1	7.02109
V5HZD3	Putative membrane protein (Fragment) OS=Ixodes ricinus PE=2 SV=1 - [V5HZD3_IXORI]	128	14.7602	8.27979	2	1	1	12	4.87871	11.72	1	2	4.91588	11.72	1	2	2.3246	11.72	1	1	5.11136	11.72	1	2	2.80768	11.72	1	1	2.37677	11.72	1	1	4.97391	11.72	1	2	0	0	0	0	0	0	0	0	0	0	0	0	2.4762
isotig11203	letm1 and ef-hand domain-containing protein anon- mitochondrial-like	540	61.7714	5.19873	1	1	1	10	4.46203	2.04	1	2	2.18671	2.04	1	1	4.24893	2.04	1	2	2.1632	2.04	1	1	2.21138	2.04	1	1	4.25552	2.04	1	2	0	0	0	0	2.06517	2.04	1	1	0	0	0	0	0	0	0	0	0
V5HJG1	Uncharacterized protein (Fragment) OS=Ixodes ricinus PE=2 SV=1 - [V5HJG1_IXORI]	84	9.48075	4.76709	2	1	1	10	2.08632	16.67	1	1	2.37351	16.67	1	2	2.38601	16.67	1	2	0	0	0	0	2.07922	16.67	1	1	5.14459	16.67	1	3	2.05024	16.67	1	1	0	0	0	0	0	0	0	0	0	0	0	0	0
V5HG14	Uncharacterized protein (Fragment) OS=Ixodes ricinus PE=2 SV=1 - [V5HG14_IXORI]	282	32.0776	8.55811	1	1	1	11	2.09562	6.03	1	1	4.3618	6.03	1	2	4.5569	6.03	1	2	4.38229	6.03	1	2	2.29789	6.03	1	1	2.57708	6.03	1	1	0	0	0	0	0	0	0	0	0	0	0	0	0	0	0	0	0
A0A131XHN7	Putative proline oxidase OS=Hyalomma excavatum PE=2 SV=1 - [A0A131XHN7_9ACAR]	617	70.4119	9.15869	1	1	1	9	6.92663	2.92	1	3	2.46808	2.92	1	1	2.092	2.92	1	1	4.51144	2.92	1	2	2.77888	2.92	1	1	2.25076	2.92	1	1	0	0	0	0	0	0	0	0	0	0	0	0	0	0	0	0	0
V5HLU0	Putative vesicle-fusing atpase 1 (Fragment) OS=Ixodes ricinus PE=2 SV=1 - [V5HLU0_IXORI]	745	82.5273	7.59131	11	1	3	18	5.44565	3.62	2	2	4.4809	3.62	2	2	2.8714	1.61	1	1	3.1915	1.61	1	1	3.10005	1.61	1	1	2.62815	1.61	1	1	5.16014	3.22	2	2	5.69537	1.61	1	2	5.51031	3.22	2	2	3.04359	1.61	1	1	2.93856
V5IJR6	Putative gtpase rab11/ypt3 small g protein superfamily OS=Ixodes ricinus PE=2 SV=1 - [V5IJR6_IXORI]	171	19.3479	9.15869	13	4	4	20	2.10181	6.43	1	1	6.33491	18.13	3	3	2.07488	6.43	1	1	4.2996	11.7	2	2	2.1248	5.26	1	1	0	0	0	0	12.0929	19.3	3	4	0	0	0	0	2.22984	7.6	1	1	8.91612	14.04	2	3	5.30308
F0JAC8	Spermidine synthase (Fragment) OS=Amblyomma variegatum PE=2 SV=1 - [F0JAC8_AMBVA]	195	21.6649	4.95752	14	1	1	16	2.39639	7.18	1	1	3.28048	7.18	1	1	8.6888	7.18	1	3	2.94943	7.18	1	1	2.60733	7.18	1	1	3.47682	7.18	1	1	3.73659	7.18	1	1	9.70992	7.18	1	3	3.70426	7.18	1	1	3.9112	7.18	1	1	3.59863
A0A131Y4D9	Putative animal-type fatty acid synthase (Fragment) OS=Ixodes ricinus PE=2 SV=1 - [A0A131Y4D9_IXORI]	1831	199.284	6.37939	8	1	3	16	3.95197	0.71	1	1	5.91642	1.42	2	2	7.13109	0.71	1	2	3.30167	0.71	1	1	3.95956	0.71	1	1	4.05556	0.71	1	1	4.11091	0.71	1	1	5.46011	1.47	2	2	4.16366	0.71	1	1	3.73572	0.71	1	1	7.02109
A0A131XQ44	Uncharacterized protein OS=Ixodes ricinus PE=2 SV=1 - [A0A131XQ44_IXORI]	415	47.6742	9.5835	1	2	2	15	4.21642	4.1	1	2	2.65195	4.1	1	1	4.83925	4.1	1	2	2.62673	4.1	1	1	2.3061	4.1	1	1	2.55683	4.1	1	1	2.04389	4.1	1	1	0	0	0	0	4.47942	4.1	1	2	4.49419	4.1	1	2	2.3782
A0A147BQC5	Putative elongation factor 2 (Fragment) OS=Ixodes ricinus PE=4 SV=1 - [A0A147BQC5_IXORI]	955	106.106	5.79541	7	2	2	15	2.23541	1.15	1	1	2.29928	1.15	1	1	6.76293	2.41	2	3	4.28823	1.15	1	2	2.30386	1.15	1	1	0	0	0	0	0	0	0	0	2.22288	1.15	1	1	4.57134	1.15	1	2	4.28729	1.15	1	2	2.12174
A0A023FNK8	Putative bifunctional atp sulfurylase/adenosine 5'-phosphosulfate kinase OS=Amblyomma cajennense PE=2 SV=1 - [A0A023FNK8_9ACAR]	579	65.1872	8.25049	12	2	3	16	0	0	0	0	2.03524	1.55	1	1	13.9253	4.15	2	4	2.23451	1.55	1	1	0	0	0	0	4.93011	4.15	2	2	2.83462	2.42	1	1	0	0	0	0	2.11922	1.55	1	1	8.30141	3.97	2	3	8.05196
A0A1E1X7V2	Putative a-kinase anchor protein 9 (Fragment) OS=Amblyomma aureolatum PE=2 SV=1 - [A0A1E1X7V2_9ACAR]	1196	134.91	5.18604	1	1	2	11	4.3953	2.17	2	2	2.7832	1	1	1	4.99125	1	1	2	2.51804	1	1	1	2.02548	1	1	1	2.66226	1	1	1	2.50879	1	1	1	0	0	0	0	2.61542	1	1	1	0	0	0	0	2.39201
A0A023FCI9	Uncharacterized protein OS=Amblyomma cajennense PE=2 SV=1 - [A0A023FCI9_9ACAR]	201	22.563	9.5249	1	1	1	9	2.06765	5.97	1	1	4.2357	5.97	1	2	4.66119	5.97	1	2	2.155	5.97	1	1	2.32162	5.97	1	1	2.2878	5.97	1	1	2.22426	5.97	1	1	0	0	0	0	0	0	0	0	0	0	0	0	0
B7P6A6	Dihydrolipoamide dehydrogenase, putative (Fragment) OS=Ixodes scapularis GN=IscW_ISCW016067 PE=4 SV=1 - [B7P6A6_IXOSC]	346	37.0662	9.14404	1	1	2	9	4.25103	8.09	2	2	2.30927	4.91	1	1	4.41341	8.09	2	2	0	0	0	0	2.12182	4.91	1	1	4.20515	4.91	1	2	2.08392	4.91	1	1	0	0	0	0	0	0	0	0	0	0	0	0	0
A0A023GHD3	Putative m13 family peptidase (Fragment) OS=Amblyomma triste PE=2 SV=1 - [A0A023GHD3_9ACAR]	736	84.9441	6.82959	3	2	2	9	2.22116	1.9	1	1	4.24274	1.9	1	2	4.30521	1.9	1	2	2.26364	1.9	1	1	4.48955	1.9	1	2	0	0	0	0	0	0	0	0	0	0	0	0	0	0	0	0	0	0	0	0	2.11165
A0A147BSF1	Putative low-density lipoprotein receptor OS=Ixodes ricinus PE=4 SV=1 - [A0A147BSF1_IXORI]	4583	512.563	5.41455	3	1	3	9	4.43069	0.33	1	2	2.39282	0.33	1	1	4.26002	0.55	2	2	0	0	0	0	2.51341	0.33	1	1	4.33405	0.55	2	2	0	0	0	0	0	0	0	0	0	0	0	0	0	0	0	0	0
A0A131XWP4	Putative m13 family peptidase OS=Ixodes ricinus PE=2 SV=1 - [A0A131XWP4_IXORI]	453	51.4782	7.92822	1	1	1	8	4.91862	2.43	1	2	4.88754	2.43	1	2	2.0557	2.43	1	1	0	0	0	0	2.53414	2.43	1	1	5.19486	2.43	1	2	0	0	0	0	0	0	0	0	0	0	0	0	0	0	0	0	0
B7PFR3	Fatty acid synthase, putative OS=Ixodes scapularis GN=IscW_ISCW005148 PE=3 SV=1 - [B7PFR3_IXOSC]	285	30.9837	8.44092	1	1	1	11	5.90286	3.86	1	2	3.44818	3.86	1	1	5.63811	3.86	1	2	2.79134	3.86	1	1	2.8944	3.86	1	1	0	0	0	0	8.83627	3.86	1	3	0	0	0	0	0	0	0	0	2.749	3.86	1	1	0
A0A131X966	Putative nad+ adp-ribosyltransferase-3-like protein strongylocentrotus purpuratus (Fragment) OS=Hyalomma excavatum PE=2 SV=1 - [A0A131X966_9ACAR]	2087	229.065	7.37158	1	2	2	10	4.40106	0.81	1	2	4.21578	0.81	1	2	2.13266	0.81	1	1	0	0	0	0	0	0	0	0	4.85669	0.81	1	2	2.28901	0.81	1	1	0	0	0	0	4.56778	0.43	1	2	0	0	0	0	0
A0A131Z5U1	Nuclear receptor subfamily 1 group I OS=Rhipicephalus appendiculatus PE=3 SV=1 - [A0A131Z5U1_RHIAP]	420	48.2863	7.45947	2	1	3	12	4.92021	2.86	1	2	2.01824	2.86	1	1	4.53688	5.95	2	2	2.39913	2.86	1	1	0	0	0	0	2.38582	2.86	1	1	0	0	0	0	2.04369	2.38	1	1	2.21706	2.86	1	1	2.31942	2.86	1	1	2.11925
V5H9A9	Putative cytochrome OS=Ixodes ricinus PE=2 SV=1 - [V5H9A9_IXORI]	158	17.7171	10.2134	1	1	1	8	4.65845	9.49	1	2	4.39093	9.49	1	2	2.28796	9.49	1	1	0	0	0	0	2.07152	9.49	1	1	2.11708	9.49	1	1	2.33938	9.49	1	1	0	0	0	0	0	0	0	0	0	0	0	0	0
V5IK19	Putative regulation of centriole-centriole cohesion (Fragment) OS=Ixodes ricinus PE=2 SV=1 - [V5IK19_IXORI]	2642	300.756	5.46533	5	2	4	8	4.07456	0.91	2	2	4.31283	0.91	2	2	2.45084	0.49	1	1	0	0	0	0	0	0	0	0	4.32855	0.98	2	2	2.11559	0.42	1	1	0	0	0	0	0	0	0	0	0	0	0	0	0
A0A0C9SES9	Uncharacterized protein OS=Amblyomma americanum PE=2 SV=1 - [A0A0C9SES9_AMBAM]	111	12.4202	8.74854	1	1	1	7	4.44678	9.01	1	2	4.2238	9.01	1	2	2.11133	9.01	1	1	0	0	0	0	2.09723	9.01	1	1	2.5123	9.01	1	1	0	0	0	0	0	0	0	0	0	0	0	0	0	0	0	0	0
A0A0K8RRV6	Putative salivary kunitz domain protein (Fragment) OS=Ixodes ricinus PE=2 SV=1 - [A0A0K8RRV6_IXORI]	174	19.1066	4.89404	1	1	1	7	2.2489	10.34	1	1	7.52989	10.34	1	3	2.29395	10.34	1	1	0	0	0	0	2.42097	10.34	1	1	2.54334	10.34	1	1	0	0	0	0	0	0	0	0	0	0	0	0	0	0	0	0	0
A0A131YNK1	Uncharacterized protein OS=Rhipicephalus appendiculatus PE=4 SV=1 - [A0A131YNK1_RHIAP]	347	37.8677	10.0229	1	1	2	7	2.1535	2.59	1	1	4.3312	6.92	2	2	4.29759	6.92	2	2	0	0	0	0	2.28435	4.32	1	1	2.33071	4.32	1	1	0	0	0	0	0	0	0	0	0	0	0	0	0	0	0	0	0
A0A1E1XQZ6	Kinase OS=Amblyomma sculptum PE=2 SV=1 - [A0A1E1XQZ6_9ACAR]	364	41.1946	8.646	1	1	1	7	5.31927	3.85	1	2	4.79846	3.85	1	2	2.1962	3.85	1	1	0	0	0	0	2.39517	3.85	1	1	2.27817	3.85	1	1	0	0	0	0	0	0	0	0	0	0	0	0	0	0	0	0	0
B7QCV0	Neprilysin, putative OS=Ixodes scapularis GN=IscW_ISCW013494 PE=4 SV=1 - [B7QCV0_IXOSC]	719	81.8143	8.76318	1	2	2	7	4.74273	4.45	2	2	2.63405	2.23	1	1	5.06166	2.23	1	2	0	0	0	0	4.1806	4.45	2	2	0	0	0	0	0	0	0	0	0	0	0	0	0	0	0	0	0	0	0	0	0
V5HFS0	Uncharacterized protein (Fragment) OS=Ixodes ricinus PE=2 SV=1 - [V5HFS0_IXORI]	299	32.9221	6.72705	2	1	1	7	4.19023	2.34	1	2	4.55355	2.34	1	2	2.05173	2.34	1	1	2.05218	2.34	1	1	2.16398	2.34	1	1	0	0	0	0	0	0	0	0	0	0	0	0	0	0	0	0	0	0	0	0	0
A0A023FPT2	Putative vacuolar sorting protein vps1 dynamin OS=Amblyomma cajennense PE=2 SV=1 - [A0A023FPT2_9ACAR]	698	78.3354	7.66455	14	6	6	13	2.69762	2.15	1	1	2.04376	1.72	1	1	7.14829	3.3	2	3	2.48504	2.15	1	1	0	0	0	0	0	0	0	0	10.7946	6.73	4	4	0	0	0	0	0	0	0	0	3.09496	1.58	1	1	2.27267
G3MPP4	Metalloendopeptidase OS=Amblyomma maculatum PE=2 SV=1 - [G3MPP4_9ACAR]	432	49.2735	7.85498	1	1	1	8	2.04097	3.01	1	1	2.21907	3.01	1	2	2.23934	3.01	1	2	0	0	0	0	0	0	0	0	0	0	0	0	0	0	0	0	0	0	0	0	2.09399	3.01	1	1	2.18975	3.01	1	1	0
isotig15436	cell adhesion	1282	142.992	6.52197	2	3	3	6	0	0	0	0	4.10587	2.03	2	2	6.72946	2.03	2	3	0	0	0	0	0	0	0	0	0	0	0	0	3.29304	0.94	1	1	0	0	0	0	0	0	0	0	0	0	0	0	0
A0A147BRH3	Putative ras gtpase-activating protein (Fragment) OS=Ixodes ricinus PE=4 SV=1 - [A0A147BRH3_IXORI]	937	106.812	6.46826	9	3	3	7	4.34371	3.2	2	2	6.48245	3.42	2	3	0	0	0	0	0	0	0	0	0	0	0	0	0	0	0	0	0	0	0	0	0	0	0	0	0	0	0	0	2.53771	1.71	1	1	2.27374
A0A0C9SCF3	Uncharacterized protein (Fragment) OS=Amblyomma americanum PE=2 SV=1 - [A0A0C9SCF3_AMBAM]	152	17.0327	8.86572	1	1	1	6	4.50713	5.26	1	2	2.19225	5.26	1	1	4.37372	5.26	1	2	0	0	0	0	0	0	0	0	0	0	0	0	0	0	0	0	0	0	0	0	0	0	0	0	0	0	0	0	0
A0A131Z5V0	Enoyl-CoA hydratase OS=Rhipicephalus appendiculatus PE=4 SV=1 - [A0A131Z5V0_RHIAP]	311	33.7192	8.39697	1	2	2	5	4.4624	7.4	2	2	4.72009	7.4	2	2	2.60175	4.18	1	1	0	0	0	0	0	0	0	0	0	0	0	0	0	0	0	0	0	0	0	0	0	0	0	0	0	0	0	0	0
B7PUX6	Secreted protein, putative OS=Ixodes scapularis GN=IscW_ISCW019789 PE=4 SV=1 - [B7PUX6_IXOSC]	115	12.579	4.70361	1	1	1	5	7.31289	13.91	1	3	0	0	0	0	4.33262	13.91	1	2	0	0	0	0	0	0	0	0	0	0	0	0	0	0	0	0	0	0	0	0	0	0	0	0	0	0	0	0	0
L7MAQ7	Uncharacterized protein (Fragment) OS=Rhipicephalus pulchellus PE=2 SV=1 - [L7MAQ7_9ACAR]	1650	181.492	5.45264	2	1	1	5	4.62686	0.79	1	2	4.42835	0.79	1	2	2.30311	0.79	1	1	0	0	0	0	0	0	0	0	0	0	0	0	0	0	0	0	0	0	0	0	0	0	0	0	0	0	0	0	0
isotig17568	lysosomal pro-x carboxypeptidase-like	470	52.6166	5.84619	1	5	5	32	3.15521	2.98	1	1	2.63243	2.98	1	1	5.13698	2.98	1	2	14.1586	10	4	5	6.77925	4.89	2	3	10.7964	7.02	3	4	12.383	8.51	3	4	0	0	0	0	8.63239	5.96	2	3	11.2805	5.96	2	3	5.5027
isotig18873	amblyomma 40-33 family member	220	24.4926	8.63135	1	6	6	41	5.76997	8.64	2	2	3.61582	5	1	1	3.17947	5	1	1	5.56559	11.36	2	2	9.26477	18.64	3	3	15.7456	24.55	4	5	28.0366	28.18	5	8	4.82282	6.36	1	2	10.0345	14.09	3	4	20.9336	22.73	4	6	10.5278
isotig15809	pancreatic lipase-related protein 2-like	382	43.2095	6.0874	1	6	6	32	5.13877	5.76	2	2	3.09046	3.66	1	1	3.40105	3.66	1	1	8.56213	8.9	3	3	7.9033	5.76	2	3	11.0231	11.26	4	4	8.38752	8.12	3	3	10.1031	5.76	2	4	9.40785	9.95	3	3	5.32211	5.76	2	2	10.6626
A0A023GEG3	Putative ribosomal protein s4 (Fragment) OS=Amblyomma triste PE=2 SV=1 - [A0A023GEG3_9ACAR]	147	16.9823	10.3745	11	4	4	25	4.92714	11.56	2	2	4.41575	11.56	2	2	0	0	0	0	4.97847	10.88	2	2	4.25421	10.88	2	2	10.7708	16.33	4	5	7.40687	10.88	2	3	5.08595	10.88	2	2	4.6176	10.88	2	2	4.73892	10.88	2	2	2.53006
isotig09335	legumain-like protease precursor	443	49.9162	8.51416	2	5	9	44	4.03888	3.16	1	1	6.25494	5.64	2	2	3.08876	3.16	1	1	10.8322	5.64	2	3	6.84834	5.42	2	4	4.30029	3.16	1	1	19.6606	15.58	6	7	7.26575	2.48	1	3	3.15528	2.48	1	1	33.1676	19.86	7	11	17.092
A0A131XDS2	Putative fructose-16-bisphosphatase OS=Hyalomma excavatum PE=2 SV=1 - [A0A131XDS2_9ACAR]	338	36.6977	7.69385	4	1	2	14	2.85092	3.25	1	1	4.97109	3.25	1	2	2.63158	3.25	1	1	7.82456	6.8	2	3	5.80515	3.25	1	2	8.17299	3.25	1	3	2.50517	3.25	1	1	0	0	0	0	0	0	0	0	0	0	0	0	0
A0A0K8RQN0	Putative delta-1-pyrroline-5-carboxylate dehydrogenase (Fragment) OS=Ixodes ricinus PE=2 SV=1 - [A0A0K8RQN0_IXORI]	610	67.5418	8.86572	4	3	3	24	2.96138	2.46	1	1	4.96942	2.46	1	2	3.059	2.46	1	1	9.98967	2.46	1	3	4.98826	3.61	2	2	5.80343	2.46	1	2	10.3838	3.61	2	4	6.90374	2.46	1	2	6.05361	4.92	2	2	3.04382	2.46	1	1	6.4304
isotig09422|legumain	isotig09422|legumain	417	46.4083	7.85498	1	3	7	25	6.16664	5.76	2	2	4.23651	3.36	1	1	3.08876	3.36	1	1	8.58011	3.36	1	2	6.84834	5.76	2	4	4.30029	3.36	1	1	11.687	9.11	3	4	0	0	0	0	0	0	0	0	21.8005	9.11	3	6	4.68408
A0A147BA24	Calcium and integrin binding protein 1 (Fragment) OS=Carios mimon PE=4 SV=1 - [A0A147BA24_9ACAR]	128	14.8713	4.88135	1	1	2	15	4.87342	8.59	1	2	2.06284	8.59	1	1	2.52876	8.59	1	1	2.05395	8.59	1	1	7.11915	8.59	1	3	7.10471	8.59	1	3	2.08397	8.59	1	1	4.10297	14.84	2	2	2.02693	6.25	1	1	0	0	0	0	0
A0A131XSJ1	Putative ubiquitin-like modifier-activating enzyme 1 (Fragment) OS=Ixodes ricinus PE=2 SV=1 - [A0A131XSJ1_IXORI]	1016	112.553	5.74463	8	1	2	16	5.75807	1.18	1	2	2.77702	1.18	1	1	3.22266	1.18	1	1	6.55979	2.26	2	3	6.05826	1.18	1	2	5.57839	1.18	1	2	5.51323	1.18	1	2	0	0	0	0	3.15355	1.18	1	1	0	0	0	0	2.83112
V5HUT6	Proteasome subunit alpha type OS=Ixodes ricinus PE=2 SV=1 - [V5HUT6_IXORI]	221	24.0822	8.5874	10	3	3	21	3.32709	6.33	1	1	6.14743	6.33	1	2	3	6.33	1	1	0	0	0	0	9.58939	11.31	3	4	9.21801	11.31	2	3	0	0	0	0	2.12906	4.07	1	1	2.59628	6.33	1	1	12.3773	11.31	2	4	8.34342
A0A0K8R2I1	Putative retinitis pigmentosa gtpase regulator b (Fragment) OS=Ixodes ricinus PE=2 SV=1 - [A0A0K8R2I1_IXORI]	544	58.6503	4.81787	2	1	1	13	2.54255	2.94	1	1	2.46911	2.94	1	1	4.78925	2.94	1	2	7.39122	2.94	1	3	4.98194	2.94	1	2	4.45623	2.94	1	2	0	0	0	0	0	0	0	0	0	0	0	0	2.26834	2.94	1	1	2.23619
isotig07762	PREDICTED: uncharacterized protein LOC100897310	190	20.875	4.79248	2	1	6	41	3.82391	6.84	1	1	6.61701	14.21	2	2	4.04584	6.84	1	1	3.56997	6.84	1	1	4.02419	6.84	1	1	11.3351	21.58	3	4	10.8411	25.79	4	4	6.21076	6.84	1	2	28.4851	18.42	3	9	6.03377	11.05	2	2	17.1317
L7MEZ6	Putative alpha tubulin (Fragment) OS=Rhipicephalus pulchellus PE=2 SV=1 - [L7MEZ6_9ACAR]	377	41.9897	5.09717	2	0	5	36	3.01153	2.65	1	1	3.54964	3.71	1	1	6.24808	6.37	2	2	2.36729	2.65	1	1	6.58092	6.37	2	2	10.983	6.37	2	3	19.1389	10.34	3	5	6.83576	6.63	2	3	10.6937	12.47	4	4	22.2876	13.79	4	7	10.8149
A0A146B000	Ribose-phosphate pyrophosphokinase 2-like protein OS=Dermanyssus gallinae PE=3 SV=1 - [A0A146B000_9ACAR]	318	34.6318	6.78564	1	5	6	36	6.3063	9.43	2	2	3.62529	5.35	1	1	4.31791	5.35	1	1	6.04528	9.75	2	2	4.18444	5.35	1	1	10.3756	5.35	1	3	11.6527	9.43	2	3	0	0	0	0	13.2519	9.43	2	4	15.7865	22.01	5	5	14.3911
A0A023FTC0	Putative atp-dependent rna helicase (Fragment) OS=Amblyomma parvum PE=2 SV=1 - [A0A023FTC0_9ACAR]	515	57.4047	7.53271	29	2	3	25	4.79374	4.27	2	2	2.52135	2.14	1	1	3.00495	2.14	1	1	8.27053	4.27	2	3	5.32296	4.27	2	2	2.82279	2.14	1	1	2.87083	2.14	1	1	7.76335	2.14	1	3	5.13859	2.14	1	2	10.1118	4.47	2	4	6.75774
B7PYN9	Fatty acid synthase, putative OS=Ixodes scapularis GN=IscW_ISCW009053 PE=4 SV=1 - [B7PYN9_IXOSC]	2453	265.638	6.53662	4	1	3	18	3.95197	0.53	1	1	3.80079	0.53	1	1	7.13109	0.53	1	2	3.30167	0.53	1	1	8.31939	1.06	2	3	6.22095	1.06	2	2	4.11091	0.53	1	1	5.46011	1.1	2	2	4.16366	0.53	1	1	3.73572	0.53	1	1	7.02109
A0A147B858	Ubiquitin like modifier activating enzyme 1 isoform 1 (Fragment) OS=Carios mimon PE=3 SV=1 - [A0A147B858_9ACAR]	632	71.85	5.94775	7	1	2	16	5.75807	1.9	1	2	2.77702	1.9	1	1	3.22266	1.9	1	1	4.27575	1.9	1	2	6.05826	1.9	1	2	5.57839	1.9	1	2	5.51323	1.9	1	2	0	0	0	0	3.15355	1.9	1	1	0	0	0	0	4.97344
A0A147BQV8	Putative heterochromatin-associated protein hp1 (Fragment) OS=Ixodes ricinus PE=4 SV=1 - [A0A147BQV8_IXORI]	1962	213.675	5.50342	1	1	2	14	2.01632	0.71	1	1	0	0	0	0	6.7868	1.58	2	3	4.62455	0.71	1	2	4.44405	0.71	1	2	4.75398	0.87	1	2	2.32207	0.71	1	1	0	0	0	0	2.47968	0.71	1	1	2.36587	0.71	1	1	0
L7MDG5	Putative leucine-rich ppr-motif protein (Fragment) OS=Rhipicephalus pulchellus PE=2 SV=1 - [L7MDG5_9ACAR]	1338	148.878	6.94678	3	2	2	12	0	0	0	0	4.84582	1.2	1	2	5.26225	1.2	1	2	2.25331	1.2	1	1	2.50139	1.2	1	1	9.14173	1.2	1	4	2.48576	1.2	1	1	0	0	0	0	0	0	0	0	2.06122	0.9	1	1	0
isotig02422	adipocyte plasma membrane-associated	380	42.0149	8.51416	4	1	5	21	2.42888	2.63	1	1	4.20923	7.11	2	2	2.02495	2.63	1	1	11.2163	3.95	1	3	5.79799	6.32	2	2	0	0	0	0	2.27238	2.63	1	1	0	0	0	0	10.6658	9.47	3	4	8.47846	8.95	3	3	7.72101
A0A131YZA0	T-complex protein 1 subunit epsilon OS=Rhipicephalus appendiculatus PE=3 SV=1 - [A0A131YZA0_RHIAP]	541	59.0848	5.73193	13	1	4	23	3.80033	3.14	1	1	6.27105	5.55	2	2	4.62943	3.14	1	1	4.58222	2.4	1	2	6.42321	5.55	2	2	4.11952	3.14	1	1	10.4548	3.14	1	3	2.57684	2.4	1	1	0	0	0	0	13.4507	7.39	3	5	6.58565
A0A131XMG5	Putative lysine-ketoglutarate reductase/saccharopine dehydrogenase OS=Hyalomma excavatum PE=2 SV=1 - [A0A131XMG5_9ACAR]	937	103.932	7.10791	10	4	4	13	2.97095	1.39	1	1	2.25693	0.85	1	1	5.27962	2.24	2	2	2.09536	1.49	1	1	2.07593	0.85	1	1	7.80445	2.24	2	3	2.03652	0.85	1	1	2.1666	1.39	1	1	4.71118	2.24	2	2	0	0	0	0	0
A0A0K8RRB4	Ribosomal protein L19 (Fragment) OS=Ixodes ricinus PE=2 SV=1 - [A0A0K8RRB4_IXORI]	175	20.5002	11.5464	2	1	1	13	5.97142	9.71	1	2	2.51221	9.71	1	1	2.33341	9.71	1	1	5.6629	9.71	1	2	6.08715	9.71	1	2	2.67163	9.71	1	1	2.49476	9.71	1	1	0	0	0	0	0	0	0	0	3.38723	9.71	1	1	2.52486
A0A023GCZ9	Putative evasin 1 OS=Amblyomma triste PE=2 SV=1 - [A0A023GCZ9_9ACAR]	145	16.0832	8.96826	1	1	1	12	4.81866	11.03	1	2	2.25536	11.03	1	1	3.02498	11.03	1	1	2.74493	11.03	1	1	8.21952	11.03	1	3	2.50636	11.03	1	1	2.75705	11.03	1	1	0	0	0	0	0	0	0	0	4.1671	11.03	1	2	0
A0A023FQM6	Putative e3 ubiquitin-protein ligase herc4 (Fragment) OS=Amblyomma cajennense PE=2 SV=1 - [A0A023FQM6_9ACAR]	785	88.6426	5.24951	1	1	1	11	5.24015	1.78	1	2	2.78108	1.78	1	1	2.49427	1.78	1	1	4.8897	1.78	1	2	2.41267	1.78	1	1	4.4752	1.78	1	2	2.39507	1.78	1	1	0	0	0	0	0	0	0	0	2.17133	1.78	1	1	0
A0A131XMS1	Lissencephaly-1 homolog OS=Hyalomma excavatum PE=2 SV=1 - [A0A131XMS1_9ACAR]	417	46.8311	7.56201	10	3	3	13	2.18359	3.6	1	1	2.12337	3.6	1	1	4.2828	7.19	2	2	6.47054	6.71	2	3	2.2123	3.6	1	1	2.27744	3.6	1	1	0	0	0	0	0	0	0	0	0	0	0	0	4.52439	6.71	2	2	0
A0A147BCT9	Putative mumet1 (Fragment) OS=Ixodes ricinus PE=4 SV=1 - [A0A147BCT9_IXORI]	743	82.4746	8.00146	1	1	1	9	2.18398	1.48	1	1	2.32815	1.48	1	1	4.62389	1.48	1	2	4.34645	1.48	1	2	5.17593	1.48	1	2	2.08129	1.48	1	1	0	0	0	0	0	0	0	0	0	0	0	0	0	0	0	0	0
A0A0C9RUR6	Putative g protein OS=Amblyomma americanum PE=2 SV=1 - [A0A0C9RUR6_AMBAM]	318	35.8609	7.63525	20	3	3	24	2.86069	3.77	1	1	4.50791	3.77	1	2	2.29827	3.77	1	1	2.77173	3.77	1	1	2.10214	4.72	1	1	4.47741	8.49	2	2	6.18952	8.49	2	2	6.78335	3.77	1	3	4.87215	3.77	1	2	8.46712	11.32	3	3	10.5673
A0A023FFW7	Putative alkyl hydroperoxide reductase thiol specific antioxidant OS=Amblyomma cajennense PE=2 SV=1 - [A0A023FFW7_9ACAR]	233	25.6125	8.67529	11	1	2	19	3.28262	4.72	1	1	2.98057	4.72	1	1	4.98495	8.15	2	2	2.98896	4.72	1	1	3.00845	4.72	1	1	4.72197	8.15	2	2	2.89816	4.72	1	1	6.8011	8.15	2	3	4.69798	4.72	1	2	2.5026	4.72	1	1	4.87036
A0A1E1X5R8	DNA polymerase epsilon subunit OS=Amblyomma aureolatum PE=2 SV=1 - [A0A1E1X5R8_9ACAR]	527	58.7321	7.57666	1	1	1	16	2.32275	2.66	1	1	4.25262	2.66	1	2	2.1382	2.66	1	1	4.33837	2.66	1	2	2.45715	2.66	1	1	2.19785	2.66	1	1	10.9389	2.66	1	5	0	0	0	0	2.29218	2.66	1	1	4.39107	2.66	1	2	0
isotig16601	PREDICTED: uncharacterized protein LOC100900995	205	22.6589	8.49951	2	5	5	29	2.38136	5.37	1	1	3.0369	7.32	1	1	5.60013	12.68	2	2	5.49284	12.68	2	2	0	0	0	0	5.53148	12.68	2	2	8.87857	19.02	3	3	0	0	0	0	6.24051	7.32	1	2	19.6402	31.22	5	6	16.0716
isotig09421|legumain	isotig09421|legumain	449	50.4348	9.1001	1	4	7	28	6.16664	5.35	2	2	4.23651	3.12	1	1	3.08876	3.12	1	1	8.58011	3.12	1	2	2.00226	3.12	1	1	4.30029	3.12	1	1	14.6785	10.24	4	5	0	0	0	0	0	0	0	0	33.1903	13.81	5	10	2.10137
B7PFK3	Putative uncharacterized protein OS=Ixodes scapularis GN=IscW_ISCW004596 PE=4 SV=1 - [B7PFK3_IXOSC]	89	9.8961	9.43701	1	2	2	23	3.12651	15.73	1	1	5.16622	26.97	2	2	2.66341	15.73	1	1	2.82233	15.73	1	1	2.61071	15.73	1	1	6.84036	15.73	1	2	7.60528	15.73	1	2	0	0	0	0	9.59477	15.73	1	3	12.0842	15.73	1	4	9.22974
isotig16076	low quality protein: spondin-1-like	394	43.6036	6.0874	1	4	4	23	2.83419	3.3	1	1	6.03957	3.3	1	2	2.78378	3.3	1	1	2.83935	3.3	1	1	3.07088	3.3	1	1	5.71144	3.3	1	2	2.04251	3.3	1	1	7.74117	3.3	1	2	6.58822	5.33	2	2	8.8402	7.61	2	3	9.47637
A0A131YTP5	Nucleosome-remodeling factor 38 kDa subunit OS=Rhipicephalus appendiculatus PE=4 SV=1 - [A0A131YTP5_RHIAP]	384	43.3099	7.13721	13	1	3	19	5.08009	7.81	2	2	2.42156	4.17	1	1	2.30237	4.17	1	1	2.21621	3.65	1	1	5.69659	4.17	1	2	2.73359	4.17	1	1	5.74258	4.17	1	2	0	0	0	0	6.31101	7.81	2	3	9.80579	6.25	2	4	2.59858
A0A0K8RB95	Putative acetyl-coa hydrolase OS=Ixodes ricinus PE=2 SV=1 - [A0A0K8RB95_IXORI]	478	51.7333	8.14795	3	1	2	15	6.44982	5.44	2	2	3.40581	2.72	1	1	3.20798	2.72	1	1	3.43125	2.72	1	1	3.196	2.72	1	1	6.9258	5.44	2	2	7.75716	5.44	2	2	4.56078	2.72	1	2	2.66617	2.72	1	1	3.56978	2.72	1	1	3.20689
A0A131XQX4	Putative polycomb protein suz12 (Fragment) OS=Ixodes ricinus PE=2 SV=1 - [A0A131XQX4_IXORI]	616	69.809	8.86572	2	1	1	15	2.65439	2.44	1	1	2.78358	2.44	1	1	5.05407	2.44	1	2	2.44831	2.44	1	1	2.62569	2.44	1	1	5.18247	2.44	1	2	2.42888	2.44	1	1	2.03358	2.44	1	1	4.79473	2.44	1	2	2.62827	2.44	1	1	2.59542
A0A0K8RGF8	Putative 40s ribosomal protein s3 OS=Ixodes ricinus PE=2 SV=1 - [A0A0K8RGF8_IXORI]	243	26.6362	9.56885	9	1	2	14	3.02853	5.35	1	1	2.59648	5.35	1	1	5.08099	5.35	1	2	5.69569	5.35	1	2	3.4125	5.35	1	1	3.51749	5.35	1	1	3.54057	5.35	1	1	5.92326	5.35	1	2	3.47079	5.35	1	1	0	0	0	0	0
A0A131Y1U1	Putative aldehyde dehydrogenase (Fragment) OS=Ixodes ricinus PE=2 SV=1 - [A0A131Y1U1_IXORI]	384	41.106	6.06201	8	1	2	20	3.24876	3.65	1	1	6.23571	3.65	1	2	2.59304	3.65	1	1	2.44749	3.65	1	1	2.83801	3.65	1	1	5.29151	5.73	2	2	3.18699	3.65	1	1	0	0	0	0	5.18194	5.73	2	2	7.44534	5.73	2	3	10.317
G3MGG5	Uncharacterized protein (Fragment) OS=Amblyomma maculatum PE=2 SV=1 - [G3MGG5_9ACAR]	360	39.5087	7.78174	14	2	2	15	2.81293	3.61	1	1	7.64275	3.61	1	2	3.41279	3.61	1	1	3.17184	3.61	1	1	6.99555	3.61	1	2	3.5855	3.61	1	1	3.2548	3.61	1	1	0	0	0	0	4.0763	3.61	1	1	6.04814	6.39	2	2	5.80492
B7PYD1	ATP-dependent RNA helicase, putative (Fragment) OS=Ixodes scapularis GN=IscW_ISCW009472 PE=3 SV=1 - [B7PYD1_IXOSC]	431	48.3987	9.05615	46	2	4	12	4.80405	4.64	2	2	2.27943	2.09	1	1	2.23137	2.09	1	1	4.69571	5.57	2	2	2.65798	2.55	1	1	2.27297	2.78	1	1	0	0	0	0	0	0	0	0	2.18213	3.02	1	1	4.60729	4.87	2	2	2.20641
A0A023GDX1	Putative ribosomal protein OS=Amblyomma triste PE=2 SV=1 - [A0A023GDX1_9ACAR]	220	25.2716	9.87646	2	1	1	9	4.26721	3.18	1	2	2.34155	3.18	1	1	2.15794	3.18	1	1	4.57791	3.18	1	2	2.11831	3.18	1	1	2.22532	3.18	1	1	2.2877	3.18	1	1	0	0	0	0	0	0	0	0	0	0	0	0	0
A0A131Z3B4	AP-1 complex subunit gamma-1 OS=Rhipicephalus appendiculatus PE=4 SV=1 - [A0A131Z3B4_RHIAP]	863	94.8741	6.40479	3	1	3	8	2.07935	1.51	1	1	2.04491	1.51	1	1	4.42536	2.9	2	2	0	0	0	0	2.00129	1.39	1	1	6.35359	2.9	2	3	0	0	0	0	0	0	0	0	0	0	0	0	0	0	0	0	0
A0A1E1X899	Uncharacterized protein OS=Amblyomma aureolatum PE=2 SV=1 - [A0A1E1X899_9ACAR]	406	45.6479	8.22119	1	1	1	8	2.7613	4.68	1	1	4.6895	4.68	1	2	2.37208	4.68	1	1	2.34013	4.68	1	1	5.44548	4.68	1	2	2.40312	4.68	1	1	0	0	0	0	0	0	0	0	0	0	0	0	0	0	0	0	0
A0A1E1XKT2	40S ribosomal protein S26 (Fragment) OS=Amblyomma sculptum PE=2 SV=1 - [A0A1E1XKT2_9ACAR]	102	11.4412	10.2866	18	1	3	21	2.18621	8.82	1	1	4.86899	8.82	1	2	2.63057	8.82	1	1	2.69941	8.82	1	1	2.30125	8.82	1	1	2.47569	8.82	1	1	5.05002	23.53	2	2	2.33265	8.82	1	1	2.46939	8.82	1	1	9.20719	35.29	3	3	10.5828
A0A0C9QZR2	Putative 40s ribosomal protein s23 (Fragment) OS=Amblyomma americanum PE=2 SV=1 - [A0A0C9QZR2_AMBAM]	142	15.9718	10.5796	12	4	4	16	2.60382	7.75	1	1	2.6758	7.75	1	1	5.0371	16.2	2	2	7.53565	15.49	2	3	0	0	0	0	0	0	0	0	7.78382	16.2	3	3	0	0	0	0	2.79972	7.75	1	1	5.68101	15.49	2	2	5.73209
A0A0C9SBK6	Putative deoxyribose-phosphate aldolase (Fragment) OS=Amblyomma americanum PE=2 SV=1 - [A0A0C9SBK6_AMBAM]	227	24.6756	6.55127	9	1	1	15	3.76055	5.29	1	1	3.19789	5.29	1	1	7.60172	5.29	1	2	3.74269	5.29	1	1	2.87027	5.29	1	1	3.83159	5.29	1	1	3.43432	5.29	1	1	0	0	0	0	7.44478	5.29	1	3	5.49654	5.29	1	2	3.54161
B7PM82	Putative uncharacterized protein OS=Ixodes scapularis GN=IscW_ISCW018592 PE=4 SV=1 - [B7PM82_IXOSC]	101	11.4071	11.4438	2	1	1	15	2.34892	12.87	1	1	4.46626	12.87	1	2	2.42558	12.87	1	1	2.04287	12.87	1	1	2.22856	12.87	1	1	2.11563	12.87	1	1	2.14077	12.87	1	1	4.62994	12.87	1	2	2.39643	12.87	1	1	2.30027	12.87	1	1	4.40484
A0A131Z4K8	WD repeat and SOF domain-containing protein 1 OS=Rhipicephalus appendiculatus PE=4 SV=1 - [A0A131Z4K8_RHIAP]	445	51.7723	9.49561	3	2	2	11	4.22403	4.94	2	2	2.02356	2.7	1	1	2.08248	2.7	1	1	2.35425	2.7	1	1	2.13455	2.7	1	1	2.19341	2.7	1	1	4.68788	2.7	1	2	4.64907	2.7	1	2	0	0	0	0	0	0	0	0	0
A6N9N4	Nucleoside diphosphate kinase OS=Ornithodoros parkeri PE=2 SV=1 - [A6N9N4_ORNPR]	153	17.2537	6.78564	1	1	1	17	2.57715	7.84	1	1	5.25887	7.84	1	2	2.38061	7.84	1	1	2.13396	7.84	1	1	2.5636	7.84	1	1	2.9704	7.84	1	1	2.75369	7.84	1	1	2.63507	7.84	1	1	2.16009	7.84	1	1	8.0883	7.84	1	3	7.33972
A0A1E1XHQ5	Putative phosphoglucomutase (Fragment) OS=Amblyomma aureolatum PE=2 SV=1 - [A0A1E1XHQ5_9ACAR]	547	59.7416	6.48096	2	1	1	14	2.08195	2.19	1	1	4.9784	2.19	1	2	2.27976	2.19	1	1	2.71548	2.19	1	1	2.40596	2.19	1	1	2.29107	2.19	1	1	2.52119	2.19	1	1	2.45665	2.19	1	1	2.17828	2.19	1	1	2.00229	2.19	1	1	5.30743
A0A0C9R153	Putative comm domain-containing protein OS=Amblyomma americanum PE=2 SV=1 - [A0A0C9R153_AMBAM]	201	22.1906	6.53662	1	1	1	13	2.33144	7.96	1	1	2.20562	7.96	1	1	4.62828	7.96	1	2	2.09494	7.96	1	1	2.27923	7.96	1	1	2.50657	7.96	1	1	2.63048	7.96	1	1	0	0	0	0	4.73309	7.96	1	2	2.1123	7.96	1	1	2.11476
B2D293	Ribosomal protein L30 (Fragment) OS=Ornithodoros coriaceus PE=2 SV=1 - [B2D293_ORNCO]	105	11.6771	9.42236	12	2	2	13	2.10269	11.43	1	1	4.95966	11.43	1	2	2.26305	11.43	1	1	0	0	0	0	2.06482	11.43	1	1	6.02082	22.86	2	2	5.34079	11.43	1	2	0	0	0	0	3.24856	11.43	1	1	0	0	0	0	3.12066
A0A131XEK0	Putative eukaryotic long-chain fatty acid coa synthetase (Fragment) OS=Hyalomma excavatum PE=2 SV=1 - [A0A131XEK0_9ACAR]	717	79.3923	7.69385	1	1	1	11	2.35836	1.53	1	1	2.20289	1.53	1	1	4.47647	1.53	1	2	2.30707	1.53	1	1	2.219	1.53	1	1	2.40805	1.53	1	1	0	0	0	0	0	0	0	0	6.81579	1.53	1	3	2.51906	1.53	1	1	0
G9NSEKQ02JHUJI	br serine threonine-protein	137	15.3616	6.40479	1	1	1	15	3.68766	11.68	1	1	4.04886	11.68	1	1	6.3557	11.68	1	2	4.12127	11.68	1	1	4.51474	11.68	1	1	3.52976	11.68	1	1	3.18025	11.68	1	1	0	0	0	0	3.55331	11.68	1	1	8.43391	11.68	1	2	6.17055
A0A023GGJ9	Putative integrin-linked kinase-associated serine/threonine phosphatase 2c (Fragment) OS=Amblyomma triste PE=2 SV=1 - [A0A023GGJ9_9ACAR]	224	25.0269	8.00146	2	1	1	13	2.71586	6.25	1	1	2.49366	6.25	1	1	5.75008	6.25	1	2	2.74722	6.25	1	1	2.23279	6.25	1	1	2.49813	6.25	1	1	5.60201	6.25	1	2	0	0	0	0	0	0	0	0	2.76993	6.25	1	1	2.64503
L7MCT6	Putative ef1alpha-like factor (Fragment) OS=Rhipicephalus pulchellus PE=2 SV=1 - [L7MCT6_9ACAR]	532	59.2707	5.65576	5	3	3	12	4.76224	1.88	1	2	2.93339	1.88	1	1	2.35832	1.88	1	1	0	0	0	0	5.17936	4.89	2	2	2.37343	1.88	1	1	5.03207	4.14	2	2	0	0	0	0	0	0	0	0	4.61783	1.88	1	2	2.01712
F0J9R3	Phosphoenolpyruvate carboxykinase (Fragment) OS=Amblyomma variegatum PE=2 SV=1 - [F0J9R3_AMBVA]	209	22.8326	8.08936	1	1	1	9	2.1103	4.31	1	1	2.41076	4.31	1	1	4.73201	4.31	1	2	0	0	0	0	4.09118	4.31	1	2	2.36424	4.31	1	1	4.97046	4.31	1	2	0	0	0	0	0	0	0	0	0	0	0	0	0
A0A131YG07	Leucyl aminopeptidase OS=Rhipicephalus appendiculatus PE=4 SV=1 - [A0A131YG07_RHIAP]	522	56.3026	6.84424	9	1	2	13	4.5383	2.11	1	2	2.13454	2.11	1	1	2.19414	2.11	1	1	0	0	0	0	2.03995	2.11	1	1	4.16342	2.11	1	2	2.01086	2.11	1	1	0	0	0	0	0	0	0	0	4.26007	2.11	1	2	4.0389
A0A131XP34	Putative arginyl-trna synthetase translation OS=Hyalomma excavatum PE=2 SV=1 - [A0A131XP34_9ACAR]	664	74.9264	6.39209	9	2	2	11	5.14171	3.31	2	2	2.21603	1.51	1	1	2.48356	1.51	1	1	2.48039	1.81	1	1	2.45361	1.81	1	1	2.04634	1.51	1	1	2.36129	1.81	1	1	0	0	0	0	0	0	0	0	0	0	0	0	0
V5GK88	Putative peroxisomal acyl-coa oxidase OS=Ixodes ricinus PE=2 SV=1 - [V5GK88_IXORI]	501	56.2727	9.36377	10	1	2	11	6.70845	3.19	1	3	0	0	0	0	2.41672	3.19	1	1	2.23825	3.19	1	1	2.21197	3.19	1	1	2.32588	3.19	1	1	2.05833	2.79	1	1	0	0	0	0	0	0	0	0	7.02983	3.19	1	3	0
L7LYK6	Putative acyl-coa synthetase OS=Rhipicephalus pulchellus PE=2 SV=1 - [L7LYK6_9ACAR]	592	66.742	7.6499	1	1	2	10	2.47068	3.04	1	1	2.23821	3.04	1	1	4.51189	3.04	1	2	2.98419	3.04	1	1	2.80661	3.04	1	1	2.67713	3.04	1	1	2.99311	3.04	1	1	0	0	0	0	0	0	0	0	2.03009	2.53	1	2	0
A0A131XP55	Putative nuclear receptor corepressor 1 (Fragment) OS=Hyalomma excavatum PE=2 SV=1 - [A0A131XP55_9ACAR]	1412	151.635	8.30908	2	1	2	8	4.18747	1.84	2	2	2.00937	0.92	1	1	2.43102	0.92	1	1	2.40801	0.92	1	1	5.05965	0.92	1	2	0	0	0	0	0	0	0	0	2.00021	0.92	1	1	0	0	0	0	0	0	0	0	0
A0A131YMI1	Lon protease homolog, mitochondrial OS=Rhipicephalus appendiculatus PE=3 SV=1 - [A0A131YMI1_RHIAP]	1029	114.638	7.35693	3	2	3	9	4.27696	1.17	1	2	2.04167	1.65	1	1	2.23877	1.65	1	1	2.44191	1.65	1	1	2.24897	1.65	1	1	2.13977	1.65	1	1	0	0	0	0	0	0	0	0	0	0	0	0	0	0	0	0	2.81865
A0A023G864	Uncharacterized protein (Fragment) OS=Amblyomma triste PE=2 SV=1 - [A0A023G864_9ACAR]	276	29.6072	6.30322	1	1	1	7	2.74087	6.52	1	2	0	0	0	0	2.62522	6.52	1	2	0	0	0	0	2.59161	6.52	1	1	2.67779	6.52	1	2	0	0	0	0	0	0	0	0	0	0	0	0	0	0	0	0	0
A0A0C9SB74	Putative cell polarity protein par6 (Fragment) OS=Amblyomma americanum PE=2 SV=1 - [A0A0C9SB74_AMBAM]	187	20.1702	5.26221	1	1	1	7	2.10384	5.35	1	1	4.42296	5.35	1	2	2.18977	5.35	1	1	0	0	0	0	2.1487	5.35	1	1	4.63784	5.35	1	2	0	0	0	0	0	0	0	0	0	0	0	0	0	0	0	0	0
A0A1E1X888	Putative very long-chain acyl-coa synthetase/fatty acid transporter OS=Amblyomma aureolatum PE=2 SV=1 - [A0A1E1X888_9ACAR]	642	71.8829	8.08936	9	1	2	7	4.95163	4.67	2	2	0	0	0	0	5.08596	2.18	1	2	0	0	0	0	2.8419	2.18	1	1	4.96535	2.18	1	2	0	0	0	0	0	0	0	0	0	0	0	0	0	0	0	0	0
L7M8Y8	Putative e3 ubiquitin-protein ligase ubr4 OS=Rhipicephalus pulchellus PE=2 SV=1 - [L7M8Y8_9ACAR]	5397	590.755	6.34131	6	2	2	7	2.26429	0.31	1	1	2.14548	0.31	1	1	2.33289	0.31	1	2	0	0	0	0	2.1485	0.31	1	1	4.06537	0.31	1	2	0	0	0	0	0	0	0	0	0	0	0	0	0	0	0	0	0
isotig07942	PREDICTED: uncharacterized protein LOC100905521	134	14.8267	6.50732	2	3	3	20	4.65425	10.45	1	2	2.13929	10.45	1	1	2.14251	10.45	1	1	2.1385	10.45	1	1	0	0	0	0	2.5123	10.45	1	1	5.64496	10.45	1	2	2.63925	10.45	1	1	5.97417	10.45	1	2	7.52835	23.13	2	2	8.83112
A0A1E1XTD1	Putative secreted salivary gland peptide (Fragment) OS=Amblyomma sculptum PE=2 SV=1 - [A0A1E1XTD1_9ACAR]	90	9.97372	8.74854	3	2	2	13	4.55268	15.56	1	2	2.22477	15.56	1	1	2.13441	15.56	1	1	0	0	0	0	2.6289	15.56	1	1	2.0755	15.56	1	1	2.21751	15.56	1	1	4.42741	23.33	2	2	4.0855	15.56	1	2	0	0	0	0	0
A0A131Z078	Phospholipid binding protein OS=Rhipicephalus appendiculatus PE=4 SV=1 - [A0A131Z078_RHIAP]	1955	217.387	6.29053	9	1	5	11	4.16875	1.38	2	2	2.14581	0.72	1	1	2.08352	0.72	1	1	2.14623	0.72	1	1	2.03357	0.72	1	1	0	0	0	0	2.12676	0.66	1	1	0	0	0	0	6.13145	1.79	3	3	0	0	0	0	0
A0A147BAZ2	T complex protein 1 subunit epsilon isoform 2 (Fragment) OS=Carios mimon PE=3 SV=1 - [A0A147BAZ2_9ACAR]	463	50.5795	6.04932	3	1	3	18	3.80033	3.67	1	1	6.06207	5.4	2	2	4.62943	3.67	1	1	0	0	0	0	3.76269	3.67	1	1	4.11952	3.67	1	1	10.4548	3.67	1	3	0	0	0	0	0	0	0	0	11.3471	5.83	2	4	6.58565
A0A131Y2T9	Putative myosin assembly protein/sexual cycle protein (Fragment) OS=Ixodes ricinus PE=2 SV=1 - [A0A131Y2T9_IXORI]	940	103.577	6.1001	3	3	5	12	2.19056	0.96	1	1	2.15904	0.96	1	1	4.30891	2.02	2	2	0	0	0	0	2.14071	0.96	1	1	2.16095	0.96	1	1	6.48496	3.4	3	3	0	0	0	0	0	0	0	0	2.09503	1.38	1	1	0
A0A131XV51	Uncharacterized protein OS=Ixodes ricinus PE=2 SV=1 - [A0A131XV51_IXORI]	363	41.0869	9.70068	3	2	2	10	2.064	4.41	1	1	2.12407	4.41	1	1	4.50827	4.41	1	2	0	0	0	0	2.14767	4.41	1	1	2.03223	4.41	1	1	4.24572	4.41	1	2	0	0	0	0	0	0	0	0	2.09409	4.68	1	2	0
A0A023FNR7	Histidine ammonia-lyase OS=Amblyomma cajennense PE=2 SV=1 - [A0A023FNR7_9ACAR]	657	72.3625	7.2251	3	1	2	8	2.32753	2.44	1	1	4.49919	2.44	1	2	2.11188	2.44	1	1	0	0	0	0	4.38731	2.44	1	2	0	0	0	0	0	0	0	0	0	0	0	0	4.22986	1.22	1	2	0	0	0	0	0
A0A131XK36	Putative endocytic adaptor protein intersectin (Fragment) OS=Hyalomma excavatum PE=2 SV=1 - [A0A131XK36_9ACAR]	972	107.828	5.50342	4	1	2	8	4.3005	1.34	1	2	2.13676	1.34	1	1	2.0716	1.34	1	1	2.07306	1.34	1	1	0	0	0	0	2.05921	1.23	1	1	2.14343	1.34	1	1	0	0	0	0	2.19876	1.34	1	1	0	0	0	0	0
A0A1E1XL42	Putative tick transposon (Fragment) OS=Amblyomma sculptum PE=2 SV=1 - [A0A1E1XL42_9ACAR]	1182	132.396	9.31982	2	2	2	8	2.4226	1.44	1	1	2.4401	1.44	1	1	4.71903	1.44	1	2	0	0	0	0	2.08246	1.44	1	1	2.07126	1.44	1	1	2.35464	1.44	1	1	0	0	0	0	2.08403	0.76	1	1	0	0	0	0	0
L7LW52	Isocitrate dehydrogenase [NADP] OS=Rhipicephalus pulchellus PE=2 SV=1 - [L7LW52_9ACAR]	390	44.0174	7.15186	12	3	4	13	4.61994	4.36	2	2	2.12814	2.31	1	1	2.24159	2.31	1	1	2.20829	2.05	1	1	0	0	0	0	2.2467	2.31	1	1	2.37065	2.31	1	1	0	0	0	0	0	0	0	0	6.85685	7.18	3	3	4.13219
L7MHP1	Putative transcriptional coactivator caper rrm superfamily (Fragment) OS=Rhipicephalus pulchellus PE=2 SV=1 - [L7MHP1_9ACAR]	505	56.0787	10.0815	7	3	3	9	2.18877	1.58	1	1	4.31619	4.95	2	2	2.30781	1.58	1	1	2.41741	2.77	1	1	0	0	0	0	2.10618	1.58	1	1	0	0	0	0	0	0	0	0	2.16431	2.77	1	1	0	0	0	0	2.18148
A0A131YI64	RB1-inducible coiled-coil protein 1 OS=Rhipicephalus appendiculatus PE=4 SV=1 - [A0A131YI64_RHIAP]	1223	137.692	5.09717	2	2	3	8	2.52795	1.14	1	1	4.23631	1.47	1	2	2.85878	1.14	1	1	0	0	0	0	0	0	0	0	4.30797	2.13	2	2	0	0	0	0	2.10676	0.65	1	1	0	0	0	0	2.1384	0.65	1	1	0
A0A131Z5H8	Isocitrate dehydrogenase [NAD] subunit, mitochondrial OS=Rhipicephalus appendiculatus PE=3 SV=1 - [A0A131Z5H8_RHIAP]	380	41.8997	8.03076	11	1	2	8	2.52808	2.11	1	1	4.67805	6.32	2	2	2.28046	2.11	1	1	2.11893	2.11	1	1	0	0	0	0	2.2425	2.11	1	1	2.33952	2.11	1	1	0	0	0	0	0	0	0	0	0	0	0	0	2.4054
V5I1P4	Uncharacterized protein (Fragment) OS=Ixodes ricinus PE=2 SV=1 - [V5I1P4_IXORI]	187	20.5748	6.11279	2	1	1	7	0	0	0	0	4.3806	8.56	1	2	4.11161	8.56	1	2	2.14743	8.56	1	1	2.1183	8.56	1	1	0	0	0	0	2.12335	8.56	1	1	0	0	0	0	0	0	0	0	0	0	0	0	0
A0A0C9R2T9	Putative kat8 regulatory nsl complex subunit 2-like protein (Fragment) OS=Amblyomma americanum PE=2 SV=1 - [A0A0C9R2T9_AMBAM]	378	41.8657	6.7124	1	1	1	7	0	0	0	0	4.20073	4.5	1	2	4.53818	4.5	1	2	2.14744	4.5	1	1	0	0	0	0	2.16169	4.5	1	1	0	0	0	0	0	0	0	0	0	0	0	0	2.28128	4.5	1	1	0
A0A131XCI7	Putative structural maintenance of chromosome protein 2 chromosome condensation complex condensin (Fragment) OS=Hyalomma excavatum PE=2 SV=1 - [A0A131XCI7_9ACAR]	709	79.5353	9.15869	1	1	2	6	2.26797	1.27	1	1	4.79318	1.27	1	2	2.18141	1.27	1	1	2.09432	1.69	1	1	2.08276	1.27	1	1	0	0	0	0	0	0	0	0	0	0	0	0	0	0	0	0	0	0	0	0	0
A0A131XJE9	Putative clathrin adaptor complex small subunit OS=Hyalomma excavatum PE=2 SV=1 - [A0A131XJE9_9ACAR]	141	16.3955	8.25049	2	1	1	6	4.26156	12.06	1	2	2.13089	12.06	1	1	2.00517	12.06	1	1	0	0	0	0	2.00268	12.06	1	1	2.13212	12.06	1	1	0	0	0	0	0	0	0	0	0	0	0	0	0	0	0	0	0
A0A131YRN5	DNA repair/transcription protein MET18/MMS19 OS=Rhipicephalus appendiculatus PE=4 SV=1 - [A0A131YRN5_RHIAP]	959	107	5.24951	1	1	2	6	2.42514	1.46	1	1	4.73016	1.77	1	2	2.15067	1.77	1	1	0	0	0	0	2.42337	1.77	1	1	2.71212	1.77	1	1	0	0	0	0	0	0	0	0	0	0	0	0	0	0	0	0	0
L7M4C7	Putative cell growth-regulating nucleolar protein OS=Rhipicephalus pulchellus PE=2 SV=1 - [L7M4C7_9ACAR]	359	41.2767	8.90967	3	2	2	13	2.58943	3.34	1	1	2.24473	3.34	1	1	4.98632	3.34	1	2	0	0	0	0	0	0	0	0	2.49504	3.34	1	1	0	0	0	0	4.71598	6.96	2	2	5.1358	3.34	1	2	2.61422	3.34	1	1	5.44995
A0A1E1X0Q8	Histone H3 (Fragment) OS=Amblyomma aureolatum PE=2 SV=1 - [A0A1E1X0Q8_9ACAR]	137	15.5545	11.1216	6	1	2	11	2.46936	6.57	1	1	4.83209	14.6	2	2	2.26544	6.57	1	1	2.01761	8.03	1	1	0	0	0	0	0	0	0	0	7.84753	14.6	2	3	0	0	0	0	0	0	0	0	4.53051	14.6	2	2	0
A0A0K8RBP8	Uncharacterized protein OS=Ixodes ricinus PE=2 SV=1 - [A0A0K8RBP8_IXORI]	117	13.4678	9.40771	1	1	1	9	2.14766	11.97	1	1	2.00265	11.97	1	1	4.04295	11.97	1	2	0	0	0	0	0	0	0	0	2.02194	11.97	1	1	6.7477	11.97	1	3	0	0	0	0	0	0	0	0	2.0435	11.97	1	1	0
A0A131Z6H4	Sphingomyelinase OS=Rhipicephalus appendiculatus PE=4 SV=1 - [A0A131Z6H4_RHIAP]	332	37.8976	9.36377	1	1	1	8	2.04805	4.82	1	1	2.59286	4.82	1	1	4.76179	4.82	1	2	0	0	0	0	2.07357	4.82	1	1	0	0	0	0	2.28659	4.82	1	1	2.44116	4.82	1	1	0	0	0	0	2.09941	4.82	1	1	0
isotig08737	cathepsin l-like	62	7.24666	7.51807	1	3	3	9	2.66175	17.74	1	1	2.33072	17.74	1	1	5.65829	40.32	2	2	0	0	0	0	0	0	0	0	3.09829	17.74	1	1	0	0	0	0	2.53234	17.74	1	1	0	0	0	0	0	0	0	0	6.47302
A0A1E1XIA1	Putative tata binding protein associated factor (Fragment) OS=Amblyomma aureolatum PE=2 SV=1 - [A0A1E1XIA1_9ACAR]	1224	136.9	6.3667	1	1	1	8	4.08977	0.82	1	2	2.00128	0.82	1	1	2.01372	0.82	1	1	2.01874	0.82	1	1	0	0	0	0	0	0	0	0	0	0	0	0	0	0	0	0	2.10459	0.82	1	1	2.23572	0.82	1	1	2.17547
A0A131XDG2	Putative epidermal growth factor receptor kinase substrate OS=Hyalomma excavatum PE=2 SV=1 - [A0A131XDG2_9ACAR]	1147	127.385	6.3667	9	2	3	7	6.24533	2.44	2	3	0	0	0	0	2.06705	1.13	1	1	0	0	0	0	0	0	0	0	2.05456	1.31	1	1	2.08924	1.31	1	1	0	0	0	0	0	0	0	0	0	0	0	0	0
B7PGL9	Putative uncharacterized protein (Fragment) OS=Ixodes scapularis GN=IscW_ISCW004849 PE=4 SV=1 - [B7PGL9_IXOSC]	733	81.5198	9.20264	2	1	1	7	4.23504	1.77	1	2	2.17287	1.77	1	1	2.09149	1.77	1	1	0	0	0	0	0	0	0	0	2.06482	1.77	1	1	0	0	0	0	0	0	0	0	2.05757	1.77	1	1	0	0	0	0	2.11293
isotig21904	ionotropic glutamate	371	40.4184	8.36768	1	1	1	7	4.54416	2.43	1	2	2.48467	2.43	1	1	2.38338	2.43	1	1	0	0	0	0	0	0	0	0	2.56583	2.43	1	1	2.53944	2.43	1	1	0	0	0	0	0	0	0	0	2.43982	2.43	1	1	0
L7MFX4	Putative structural maintenance (Fragment) OS=Rhipicephalus pulchellus PE=2 SV=1 - [L7MFX4_9ACAR]	2039	229.123	8.00146	4	1	3	7	2.26797	0.44	1	1	4.79318	0.44	1	2	2.18141	0.44	1	1	0	0	0	0	2.08276	0.44	1	1	0	0	0	0	0	0	0	0	0	0	0	0	2.14851	0.59	1	1	2.0146	0.64	1	1	0
A0A131YXZ2	52 kD repressor of inhibitor of protein kinase OS=Rhipicephalus appendiculatus PE=4 SV=1 - [A0A131YXZ2_RHIAP]	882	97.0903	9.51025	1	1	1	6	0	0	0	0	4.49766	1.81	1	2	4.64399	1.81	1	2	2.02815	1.81	1	1	0	0	0	0	0	0	0	0	2.3783	1.81	1	1	0	0	0	0	0	0	0	0	0	0	0	0	0
A0A1E1XR86	XK-related protein (Fragment) OS=Amblyomma sculptum PE=2 SV=1 - [A0A1E1XR86_9ACAR]	454	51.0927	6.91748	1	1	1	6	2.17313	2.64	1	1	2.29405	2.64	1	1	4.21233	2.64	1	2	0	0	0	0	0	0	0	0	2.23035	2.64	1	1	2.06008	2.64	1	1	0	0	0	0	0	0	0	0	0	0	0	0	0
B7PD92	Kakapo, putative OS=Ixodes scapularis GN=IscW_ISCW016610 PE=4 SV=1 - [B7PD92_IXOSC]	1682	191.969	4.99561	1	2	2	6	2.40964	0.95	1	1	2.07634	0.95	1	1	4.60178	0.95	1	2	0	0	0	0	2.45683	0.77	1	1	0	0	0	0	0	0	0	0	0	0	0	0	0	0	0	0	0	0	0	0	0
A0A023GDN8	Putative ca2+-dependent phospholipid-binding protein synaptotagmin required for synaptic vesicle OS=Amblyomma triste PE=2 SV=1 - [A0A023GDN8_9ACAR]	430	48.2578	8.90967	2	2	3	5	6.45609	6.51	3	3	0	0	0	0	2.1917	2.09	1	1	0	0	0	0	0	0	0	0	2.17074	2.09	1	1	0	0	0	0	0	0	0	0	0	0	0	0	0	0	0	0	0
A0A023GE06	Putative extracellular-glutamate-gated ion channel (Fragment) OS=Amblyomma triste PE=2 SV=1 - [A0A023GE06_9ACAR]	458	50.9167	4.76709	1	1	1	5	8.68684	3.06	1	4	0	0	0	0	0	0	0	0	2.30817	3.06	1	1	0	0	0	0	0	0	0	0	0	0	0	0	0	0	0	0	0	0	0	0	0	0	0	0	0
A0A131ZB08	Solute carrier family 27 (Fatty acid transporter), member 1/4 (Fragment) OS=Rhipicephalus appendiculatus PE=4 SV=1 - [A0A131ZB08_RHIAP]	538	59.5071	9.49561	1	1	1	5	4.70283	2.42	1	2	2.77735	2.42	1	1	2.32677	2.42	1	1	0	0	0	0	0	0	0	0	2.85289	2.42	1	1	0	0	0	0	0	0	0	0	0	0	0	0	0	0	0	0	0
A0A147BDZ5	Putative tropomyosin (Fragment) OS=Ixodes ricinus PE=4 SV=1 - [A0A147BDZ5_IXORI]	615	68.613	5.05908	3	2	2	5	4.13202	4.23	2	2	2.03423	1.79	1	1	2.12448	1.79	1	1	0	0	0	0	0	0	0	0	2.08301	1.79	1	1	0	0	0	0	0	0	0	0	0	0	0	0	0	0	0	0	0
A0A1E1X2T6	Putative late secretory pathway protein avl9 (Fragment) OS=Amblyomma aureolatum PE=2 SV=1 - [A0A1E1X2T6_9ACAR]	793	88.064	5.31299	7	1	2	5	4.20656	3.78	2	2	4.55654	3.78	2	2	0	0	0	0	0	0	0	0	0	0	0	0	2.20861	1.77	1	1	0	0	0	0	0	0	0	0	0	0	0	0	0	0	0	0	0
A0A1E1X2Y2	Putative tick transposon (Fragment) OS=Amblyomma aureolatum PE=2 SV=1 - [A0A1E1X2Y2_9ACAR]	319	35.5558	5.40186	1	1	1	5	2.11669	4.39	1	1	4.08797	4.39	1	2	2.20476	4.39	1	1	0	0	0	0	0	0	0	0	2.28594	4.39	1	1	0	0	0	0	0	0	0	0	0	0	0	0	0	0	0	0	0
A0A1E1X6U9	Putative microtubule-associated protein tau (Fragment) OS=Amblyomma aureolatum PE=2 SV=1 - [A0A1E1X6U9_9ACAR]	733	77.7529	4.84326	2	3	3	5	0	0	0	0	2.36272	1.91	1	1	6.44381	3.55	2	3	0	0	0	0	2.02093	2.05	1	1	0	0	0	0	0	0	0	0	0	0	0	0	0	0	0	0	0	0	0	0	0
B7PJ75	Putative uncharacterized protein OS=Ixodes scapularis GN=IscW_ISCW004415 PE=4 SV=1 - [B7PJ75_IXOSC]	58	6.0931	9.01221	1	1	1	5	2.22172	24.14	1	1	2.08202	24.14	1	1	4.28608	24.14	1	2	2.31853	24.14	1	1	0	0	0	0	0	0	0	0	0	0	0	0	0	0	0	0	0	0	0	0	0	0	0	0	0
B7QGN0	Sodium/solute symporter, putative OS=Ixodes scapularis GN=IscW_ISCW023344 PE=3 SV=1 - [B7QGN0_IXOSC]	357	39.0836	8.67529	1	1	1	5	0	0	0	0	4.42179	4.2	1	2	4.57284	4.2	1	2	0	0	0	0	0	0	0	0	2.4266	4.2	1	1	0	0	0	0	0	0	0	0	0	0	0	0	0	0	0	0	0
isotig11793	metal transporter cnnm2-like	760	83.4812	5.79541	1	1	1	5	4.67861	1.71	1	2	2.14138	1.71	1	1	2.1665	1.71	1	1	0	0	0	0	0	0	0	0	2.12279	1.71	1	1	0	0	0	0	0	0	0	0	0	0	0	0	0	0	0	0	0
L7MDM1	Uncharacterized protein (Fragment) OS=Rhipicephalus pulchellus PE=2 SV=1 - [L7MDM1_9ACAR]	564	61.5577	8.1626	1	1	1	5	0	0	0	0	4.52383	3.19	1	2	4.46033	3.19	1	2	0	0	0	0	0	0	0	0	2.22183	3.19	1	1	0	0	0	0	0	0	0	0	0	0	0	0	0	0	0	0	0
V5HS01	Putative e3 ubiquitin-protein ligase nrdp1 (Fragment) OS=Ixodes ricinus PE=2 SV=1 - [V5HS01_IXORI]	396	43.6139	5.8335	2	1	1	5	2.52175	3.79	1	1	5.09675	3.79	1	2	2.45089	3.79	1	1	0	0	0	0	0	0	0	0	2.60054	3.79	1	1	0	0	0	0	0	0	0	0	0	0	0	0	0	0	0	0	0
B7QL72	Zinc finger protein, putative OS=Ixodes scapularis GN=IscW_ISCW023335 PE=4 SV=1 - [B7QL72_IXOSC]	2312	252.502	6.37939	1	1	2	6	2.11645	0.52	1	1	2.09294	0.52	1	1	4.21353	0.52	1	2	0	0	0	0	0	0	0	0	0	0	0	0	2.37802	0.52	1	1	0	0	0	0	2.09626	0.52	1	1	0	0	0	0	0
A0A131YW40	Rho associated coiled coil OS=Rhipicephalus appendiculatus PE=3 SV=1 - [A0A131YW40_RHIAP]	1721	194.306	6.49365	6	2	3	7	2.04962	0.76	1	1	0	0	0	0	6.68288	0.76	1	3	0	0	0	0	0	0	0	0	0	0	0	0	2.05989	0.76	1	1	0	0	0	0	0	0	0	0	0	0	0	0	2.12108
A0A0K8RKI6	Putative hmg-box transcription factor OS=Ixodes ricinus PE=2 SV=1 - [A0A0K8RKI6_IXORI]	279	30.4616	9.99365	1	1	1	5	2.31107	5.73	1	1	2.19018	5.73	1	1	4.36758	5.73	1	2	0	0	0	0	0	0	0	0	0	0	0	0	2.0542	5.73	1	1	0	0	0	0	0	0	0	0	0	0	0	0	0
A0A131YTB2	Phosphate transporter OS=Rhipicephalus appendiculatus PE=3 SV=1 - [A0A131YTB2_RHIAP]	536	57.936	7.37158	4	2	2	5	2.01882	2.43	1	1	4.23781	2.43	1	2	2.0609	2.43	1	1	0	0	0	0	0	0	0	0	0	0	0	0	0	0	0	0	0	0	0	0	2.17106	2.24	1	1	0	0	0	0	0
A0A147BDA8	Putative transposable element (Fragment) OS=Ixodes ricinus PE=4 SV=1 - [A0A147BDA8_IXORI]	814	91.3289	7.85498	1	3	3	5	4.71145	3.93	2	2	0	0	0	0	4.35466	3.44	2	2	0	0	0	0	0	0	0	0	0	0	0	0	2.15543	1.72	1	1	0	0	0	0	0	0	0	0	0	0	0	0	0
A0A1E1XE68	Putative ran gtpase-activating protein OS=Amblyomma aureolatum PE=2 SV=1 - [A0A1E1XE68_9ACAR]	732	80.9469	8.90967	1	2	2	5	2.32886	1.64	1	1	4.3323	1.64	1	2	2.24983	1.64	1	1	0	0	0	0	0	0	0	0	0	0	0	0	0	0	0	0	0	0	0	0	0	0	0	0	0	0	0	0	0
B7QD05	Flotillin-1, putative OS=Ixodes scapularis GN=IscW_ISCW022164 PE=4 SV=1 - [B7QD05_IXOSC]	233	25.8885	7.1665	6	2	2	5	2.06418	6.44	1	1	2.02595	6.44	1	1	4.66503	6.44	1	2	0	0	0	0	0	0	0	0	0	0	0	0	0	0	0	0	0	0	0	0	0	0	0	0	0	0	0	0	0
A0A0C9S0V3	Peptidyl-prolyl cis-trans isomerase (Fragment) OS=Amblyomma americanum PE=2 SV=1 - [A0A0C9S0V3_AMBAM]	155	17.3019	8.86572	2	1	1	4	0	0	0	0	4.6324	11.61	1	2	4.75802	11.61	1	2	0	0	0	0	0	0	0	0	0	0	0	0	0	0	0	0	0	0	0	0	0	0	0	0	0	0	0	0	0
A0A131Z9T3	Transcription factor A, mitochondrial (Fragment) OS=Rhipicephalus appendiculatus PE=4 SV=1 - [A0A131Z9T3_RHIAP]	264	30.104	9.94971	2	1	1	4	2.42741	5.68	1	1	2.02302	5.68	1	1	4.25393	5.68	1	2	0	0	0	0	0	0	0	0	0	0	0	0	0	0	0	0	0	0	0	0	0	0	0	0	0	0	0	0	0
A0A147B822	Uncharacterized protein (Fragment) OS=Carios mimon PE=4 SV=1 - [A0A147B822_9ACAR]	164	15.6116	5.0083	1	2	2	4	0	0	0	0	6.42774	10.98	2	3	2.07747	10.37	1	1	0	0	0	0	0	0	0	0	0	0	0	0	0	0	0	0	0	0	0	0	0	0	0	0	0	0	0	0	0
A0A1E1X9R4	Putative 28s ribosomal protein s29 mitochondrial (Fragment) OS=Amblyomma aureolatum PE=2 SV=1 - [A0A1E1X9R4_9ACAR]	392	45.4202	8.646	2	1	1	4	4.49693	4.08	1	2	0	0	0	0	4.11733	4.08	1	2	0	0	0	0	0	0	0	0	0	0	0	0	0	0	0	0	0	0	0	0	0	0	0	0	0	0	0	0	0
isotig19394	epoxide hydrolase 1-like	422	46.6328	7.31299	1	2	2	4	2.13011	2.37	1	1	4.81423	3.08	2	2	2.0653	2.37	1	1	0	0	0	0	0	0	0	0	0	0	0	0	0	0	0	0	0	0	0	0	0	0	0	0	0	0	0	0	0
isotig28391|---NA---	isotig28391|---NA---	162	19.1993	9.84717	1	1	1	4	2.19037	9.26	1	1	2.15089	9.26	1	1	4.2441	9.26	1	2	0	0	0	0	0	0	0	0	0	0	0	0	0	0	0	0	0	0	0	0	0	0	0	0	0	0	0	0	0
L7MI58	Uncharacterized protein (Fragment) OS=Rhipicephalus pulchellus PE=2 SV=1 - [L7MI58_9ACAR]	406	45.4487	9.36377	1	1	1	4	0	0	0	0	5.09144	3.69	1	2	5.04428	3.69	1	2	0	0	0	0	0	0	0	0	0	0	0	0	0	0	0	0	0	0	0	0	0	0	0	0	0	0	0	0	0
isotig10024	lipase 3-like	475	54.6912	7.91357	1	3	3	21	2.35326	2.32	1	1	2.31625	2.32	1	1	2.11943	2.32	1	1	6.91691	4.84	2	3	6.89997	4.84	2	3	14.2711	7.37	3	6	2.1896	2.32	1	1	0	0	0	0	0	0	0	0	2.48262	2.53	1	1	4.67558
A0A1E1XQ28	Putative branched chain alpha-keto acid dehydrogenase complex alpha subunit (Fragment) OS=Amblyomma sculptum PE=2 SV=1 - [A0A1E1XQ28_9ACAR]	345	39.545	6.46826	8	2	2	22	6.0024	8.7	2	2	3.55253	4.06	1	1	0	0	0	0	6.40679	8.7	2	2	9.88672	4.06	1	3	13.6458	4.06	1	4	9.59224	4.06	1	3	3.45646	4.06	1	1	5.74708	4.06	1	2	6.39261	4.06	1	2	7.4549
A0A023FZG8	Adenosylhomocysteinase OS=Amblyomma parvum PE=2 SV=1 - [A0A023FZG8_9ACAR]	405	44.8219	6.82959	12	3	4	17	2.63804	2.22	1	1	2.03018	2.47	1	1	2.18722	2.22	1	1	4.27709	4.69	2	2	4.6647	4.69	2	2	11.7623	4.69	3	5	0	0	0	0	2.07873	2.22	1	1	0	0	0	0	2.68887	2.47	1	1	2.78315
A0A023G6D5	Putative triple helix repeat-containing collagen (Fragment) OS=Amblyomma triste PE=2 SV=1 - [A0A023G6D5_9ACAR]	361	36.9033	10.3159	1	1	1	17	2.00514	3.88	1	1	2.05592	3.88	1	2	0	0	0	0	4.48247	3.88	1	3	4.48158	3.88	1	3	2.18884	3.88	1	2	2.30885	3.88	1	1	2.61931	3.88	1	2	0	0	0	0	0	0	0	0	2.0543
A0A0K8RNG6	Putative secreted protein (Fragment) OS=Ixodes ricinus PE=2 SV=1 - [A0A0K8RNG6_IXORI]	174	17.3414	6.88818	1	1	1	12	2.40887	10.34	1	1	2.20431	10.34	1	1	2.80031	10.34	1	1	7.1626	10.34	1	3	4.45018	10.34	1	2	4.83012	10.34	1	2	2.23278	10.34	1	1	0	0	0	0	0	0	0	0	0	0	0	0	2.25546
A0A131YH40	ATP-dependent RNA helicase DDX43 OS=Rhipicephalus appendiculatus PE=3 SV=1 - [A0A131YH40_RHIAP]	656	74.7117	5.71924	10	1	2	10	2.77734	1.68	1	1	5.25357	1.68	1	2	0	0	0	0	2.26389	1.68	1	1	2.87188	1.68	1	1	10.3712	4.12	2	5	0	0	0	0	0	0	0	0	0	0	0	0	0	0	0	0	0
isotig08662	PREDICTED: uncharacterized protein LOC100908559	104	11.7112	8.14795	1	5	5	54	2.16119	8.65	1	1	2.29487	8.65	1	1	2.40274	8.65	1	1	11.1398	50.96	4	4	2.50911	8.65	1	1	2.27059	8.65	1	1	24.7133	51.92	5	7	0	0	0	0	33.1238	51.92	5	10	39.1921	51.92	5	11	24.5587
A0A1D2AIE7	Actin depolymerizing factor 1 OS=Ornithodoros brasiliensis PE=3 SV=1 - [A0A1D2AIE7_ORNBR]	148	16.9925	6.20166	1	2	2	27	2.84293	8.11	1	1	2.56861	8.11	1	1	2.82187	8.11	1	1	4.63748	8.11	2	2	4.47401	8.11	2	2	4.90655	8.11	2	2	7.27503	8.11	2	3	5.2244	7.43	1	2	2.42804	8.11	1	1	12.3486	8.11	2	5	4.81126
A0A0K8RNA0	Putative nad-dependent malate dehydrogenase OS=Ixodes ricinus PE=2 SV=1 - [A0A0K8RNA0_IXORI]	340	35.788	9.08545	16	3	3	18	3.1367	4.71	1	1	4.14101	4.71	1	1	3.55771	4.71	1	1	11.2523	4.71	1	3	7.55152	4.71	1	2	3.65889	4.71	1	1	6.63505	4.71	1	2	0	0	0	0	12.4645	7.94	2	4	7.72582	11.47	3	3	0
A0A023GI13	Putative thioredoxin peroxidase (Fragment) OS=Amblyomma triste PE=2 SV=1 - [A0A023GI13_9ACAR]	183	20.4814	5.42725	10	0	2	17	2.42642	5.46	1	1	2.5037	5.46	1	1	2.50331	5.46	1	1	4.69772	5.46	1	2	4.83267	5.46	1	2	4.84229	5.46	1	2	3.19191	5.46	1	1	4.763	5.46	1	2	5.80538	11.48	2	2	6.04347	5.46	1	2	3.54328
isotig08854	thioredoxin domain-containing protein 5-like	385	42.7314	5.78271	1	4	4	18	6.53451	7.53	2	2	3.71992	4.42	1	1	0	0	0	0	7.02411	7.27	2	2	7.21484	7.27	2	2	6.68328	7.53	2	2	14.1074	11.17	3	4	0	0	0	0	0	0	0	0	7.49021	7.53	2	2	2.9858
A0A090X885	Putative yprime (Fragment) OS=Ixodes ricinus PE=2 SV=1 - [A0A090X885_IXORI]	639	70.146	6.88818	11	1	2	10	2.77734	1.72	1	1	5.25357	1.72	1	2	0	0	0	0	2.26389	1.72	1	1	2.87188	1.72	1	1	8.31459	1.72	1	4	2.01296	2.35	1	1	0	0	0	0	0	0	0	0	0	0	0	0	0
A0A131YCJ0	Putative regulation of transcription OS=Ixodes ricinus PE=2 SV=1 - [A0A131YCJ0_IXORI]	607	68.6132	7.47412	3	2	2	9	2.13141	1.98	1	1	2.19944	1.98	1	1	2.24732	1.98	1	1	2.39346	1.98	1	1	8.85493	1.98	1	4	2.1372	1.98	1	1	0	0	0	0	0	0	0	0	0	0	0	0	0	0	0	0	0
V5H7E6	Putative aaa atpase (Fragment) OS=Ixodes ricinus PE=2 SV=1 - [V5H7E6_IXORI]	1530	171.505	6.90283	2	1	1	9	2.67821	1.11	1	1	2.14255	1.11	1	1	2.41635	1.11	1	1	4.85551	1.11	1	2	4.59776	1.11	1	2	4.64542	1.11	1	2	0	0	0	0	0	0	0	0	0	0	0	0	0	0	0	0	0
V5I001	Putative myosin class i heavy chain OS=Ixodes ricinus PE=2 SV=1 - [V5I001_IXORI]	2224	255.006	6.49365	12	1	10	38	3.18075	0.58	1	1	3.50754	0.58	1	1	3.68346	0.58	1	1	3.03176	0.58	1	1	5.46036	1.21	2	2	6.22842	1.03	2	2	15.7948	1.66	3	5	14.6422	1.39	3	6	18.8625	1.62	4	6	12.9409	2.61	5	5	3.13284
A0A1E1X279	Putative myosin class i heavy chain OS=Amblyomma aureolatum PE=2 SV=1 - [A0A1E1X279_9ACAR]	1942	222.102	6.04932	8	2	9	33	3.18075	0.67	1	1	3.50754	0.67	1	1	3.68346	0.67	1	1	3.03176	0.67	1	1	5.46036	1.39	2	2	6.00994	1.29	2	2	17.9767	2.42	4	6	9.45338	1.6	3	4	16.4129	1.8	3	5	10.8876	2.47	4	4	3.13284
isotig07763|---NA---	isotig07763|---NA---	190	20.977	4.84326	2	1	6	31	3.82391	6.84	1	1	4.36243	6.84	1	1	4.04584	6.84	1	1	3.56997	6.84	1	1	4.02419	6.84	1	1	8.71981	14.21	2	3	8.49245	18.42	3	3	6.21076	6.84	1	2	13.1885	11.05	2	4	6.03377	11.05	2	2	17.1317
A0A090XF52	Putative fumarase OS=Ixodes ricinus PE=2 SV=1 - [A0A090XF52_IXORI]	393	41.8943	7.25439	8	2	3	26	5.3967	4.58	1	1	4.91782	4.58	1	1	4.14888	4.58	1	1	4.7935	4.58	1	1	10.0277	7.89	2	3	4.8154	4.58	1	1	10.1759	7.12	2	3	4.99815	2.54	1	2	17.1905	7.12	2	4	16.3174	7.12	2	4	15.1425
isotig34748	mucin peritrophin-like protein precursor	93	10.096	7.63525	1	3	3	23	4.06743	11.83	1	1	3.78957	11.83	1	1	3.79682	11.83	1	1	4.47448	11.83	1	1	6.50442	11.83	1	2	6.53162	11.83	1	2	8.45275	21.51	2	3	3.94956	11.83	1	1	7.96326	11.83	1	3	10.67	31.18	3	4	5.59903
isotig02421	adipocyte plasma membrane-associated	380	41.986	8.51416	4	1	5	21	2.42888	2.63	1	1	2.13295	2.37	1	1	2.02495	2.63	1	1	11.2163	3.95	1	3	5.79799	6.32	2	2	0	0	0	0	5.01288	6.32	2	2	0	0	0	0	10.6658	9.47	3	4	8.47846	8.95	3	3	7.72101
A0A131XGD8	Proteasome subunit alpha type OS=Hyalomma excavatum PE=2 SV=1 - [A0A131XGD8_9ACAR]	248	27.9687	8.29443	13	3	3	14	3.91373	5.65	1	1	3.8	5.65	1	1	3.83562	5.65	1	1	3.82609	5.65	1	1	5.10461	11.29	2	2	5.77403	9.27	2	2	4.32107	5.65	1	1	0	0	0	0	7.42387	5.65	1	2	4.10696	5.65	1	1	4.16498
A0A147BSS9	Putative guanine nucleotide exchange factor for rho and rac gtpase (Fragment) OS=Ixodes ricinus PE=4 SV=1 - [A0A147BSS9_IXORI]	1541	172.511	6.53662	13	2	5	12	2.11373	0.91	1	1	2.14581	0.91	1	1	2.08352	0.91	1	1	2.14623	0.91	1	1	4.08169	1.75	2	2	2.32172	0.84	1	2	2.0328	0.65	1	1	0	0	0	0	4.1139	1.56	2	2	0	0	0	0	0
A0A131XSD3	Putative mitochondrial enolase superfamily member 1 (Fragment) OS=Ixodes ricinus PE=2 SV=1 - [A0A131XSD3_IXORI]	433	48.6106	6.68311	2	1	1	12	0	0	0	0	2.04357	2.77	1	1	4.13272	2.77	1	2	4.27559	2.77	1	2	6.6107	2.77	1	3	0	0	0	0	4.09037	2.77	1	2	0	0	0	0	0	0	0	0	0	0	0	0	2.14878
L7M167	Uncharacterized protein OS=Rhipicephalus pulchellus PE=2 SV=1 - [L7M167_9ACAR]	249	27.6383	6.53662	1	1	1	12	2.21882	7.63	1	1	2.1438	7.63	1	1	2.06895	7.63	1	1	2.00214	7.63	1	1	4.40433	7.63	1	3	2.07382	7.63	1	1	2.29027	7.63	1	1	0	0	0	0	0	0	0	0	2.28224	7.63	1	1	0
A0A131XAM4	Adenylosuccinate lyase OS=Hyalomma excavatum PE=2 SV=1 - [A0A131XAM4_9ACAR]	478	53.7365	7.35693	7	1	2	9	4.57928	2.3	1	2	2.85182	2.3	1	1	0	0	0	0	0	0	0	0	7.04379	2.3	1	3	5.13876	2.3	1	2	0	0	0	0	2.11335	1.88	1	1	0	0	0	0	0	0	0	0	0
L7M077	Putative na+/dicarboxylate na+/tricarboxylate and phosphate transporter OS=Rhipicephalus pulchellus PE=2 SV=1 - [L7M077_9ACAR]	594	65.5281	8.08936	3	2	2	9	5.09776	2.02	1	2	2.01974	2.02	1	1	0	0	0	0	4.16917	4.88	2	2	2.27006	2.02	1	1	4.71607	4.88	2	2	2.14522	2.86	1	1	0	0	0	0	0	0	0	0	0	0	0	0	0
A0A1E1XG77	Putative tick transposon (Fragment) OS=Amblyomma aureolatum PE=2 SV=1 - [A0A1E1XG77_9ACAR]	1129	130.318	8.646	1	1	1	8	2.74297	1.06	1	1	2.1603	1.06	1	1	2.0251	1.06	1	1	6.21384	1.06	1	3	2.02423	1.06	1	1	2.50421	1.06	1	1	0	0	0	0	0	0	0	0	0	0	0	0	0	0	0	0	0
isotig09189|---NA---	isotig09189|---NA---	105	11.3668	7.28369	4	3	3	22	2.82106	10.48	1	1	2.44967	10.48	1	1	2.70386	10.48	1	1	5.51752	21.9	2	2	4.91324	21.9	2	2	0	0	0	0	5.81254	21.9	2	2	9.37601	21.9	2	3	9.17585	21.9	2	3	5.68001	22.86	2	2	6.8581
A0A023FVJ7	3-hydroxyisobutyrate dehydrogenase OS=Amblyomma parvum PE=2 SV=1 - [A0A023FVJ7_9ACAR]	332	34.5615	7.41553	1	1	1	15	2.18369	3.61	1	1	2.51489	3.61	1	1	2.55356	3.61	1	1	5.1734	3.61	1	2	2.95947	3.61	1	1	2.95456	3.61	1	1	3.70234	3.61	1	1	9.84577	3.61	1	3	3.34745	3.61	1	1	3.56077	3.61	1	1	3.87589
A0A147BSS8	Putative formyltetrahydrofolate dehydrogenase (Fragment) OS=Ixodes ricinus PE=4 SV=1 - [A0A147BSS8_IXORI]	506	54.6942	5.38916	1	2	3	14	3.13128	2.17	1	1	2.87216	2.17	1	1	2.57828	2.17	1	1	4.99314	4.94	2	2	3.09658	2.17	1	1	2.38437	2.17	1	1	5.11712	3.95	2	2	6.43421	2.17	1	2	3.2714	2.17	1	1	3.15849	2.17	1	1	0
A0A1E1XGH4	Putative ubiquitin-activating enzyme e1b (Fragment) OS=Amblyomma aureolatum PE=2 SV=1 - [A0A1E1XGH4_9ACAR]	330	36.242	5.09717	1	1	1	15	2.45382	4.85	1	1	2.56963	4.85	1	1	2.70298	4.85	1	1	5.29545	4.85	1	2	2.45037	4.85	1	1	2.67668	4.85	1	1	5.69281	4.85	1	2	0	0	0	0	5.71822	4.85	1	2	2.78708	4.85	1	1	2.7536
L7MIM3	Putative msx2-interacting protein (Fragment) OS=Rhipicephalus pulchellus PE=2 SV=1 - [L7MIM3_9ACAR]	4054	445.298	6.97607	5	2	2	14	2.3495	0.25	1	1	2.34794	0.25	1	1	2.14226	0.25	1	1	2.13624	0.25	1	1	4.22485	0.25	1	2	2.18676	0.25	1	1	2.19221	0.25	1	1	4.0799	0.25	1	2	2.22458	0.25	1	1	2.20081	0.37	1	1	2.06395
Q09JN0	60S ribosomal protein L7 OS=Argas monolakensis PE=2 SV=1 - [Q09JN0_ARGMO]	250	29.5407	11.1655	1	1	1	16	3.81446	5.6	1	1	3.61002	5.6	1	1	4.22453	5.6	1	1	6.82027	5.6	1	2	3.29766	5.6	1	1	3.43478	5.6	1	1	3.95871	5.6	1	1	0	0	0	0	6.40302	5.6	1	2	7.36332	5.6	1	2	6.28337
A0A131XPJ7	Eukaryotic translation initiation factor 3 subunit C OS=Ixodes ricinus PE=2 SV=1 - [A0A131XPJ7_IXORI]	956	109.507	5.57959	4	2	3	14	0	0	0	0	5.16653	2.62	2	2	2.61464	1.46	1	1	4.95702	2.62	2	2	2.40777	1.15	1	1	2.59536	1.46	1	1	5.59392	2.62	2	2	0	0	0	0	2.56391	1.46	1	1	2.9197	1.46	1	1	2.50663
A0A1E1X9A1	Putative serine/threonine-protein kinase smg1 (Fragment) OS=Amblyomma aureolatum PE=2 SV=1 - [A0A1E1X9A1_9ACAR]	3113	341.449	6.39209	1	1	2	15	0	0	0	0	2.36131	0.55	1	1	4.69711	1	2	2	4.6155	1	2	2	2.55742	0.55	1	1	2.51467	0.55	1	1	2.55869	0.55	1	1	2.10231	0.55	1	1	0	0	0	0	6.68116	1	2	3	2.58594
A0A023GIE4	Putative mitochondrial fad carrier protein OS=Amblyomma triste PE=2 SV=1 - [A0A023GIE4_9ACAR]	322	36.0175	9.81787	3	1	1	10	2.67797	5.28	1	1	2.41227	5.28	1	1	2.20342	5.28	1	1	4.67009	5.28	1	2	2.45541	5.28	1	1	2.23197	5.28	1	1	2.31157	5.28	1	1	0	0	0	0	2.02326	5.28	1	1	2.0971	5.28	1	1	0
A0A147BU31	Putative molecular chaperone (Fragment) OS=Ixodes ricinus PE=4 SV=1 - [A0A147BU31_IXORI]	281	31.7069	6.53662	4	1	1	13	2.456	4.63	1	1	2.44458	4.63	1	1	2.66265	4.63	1	1	4.69257	4.63	1	2	3.04834	4.63	1	1	2.46087	4.63	1	1	3.17676	4.63	1	1	0	0	0	0	0	0	0	0	2.03504	4.63	1	1	4.81423
G9NSEKQ01DBQ43|---NA---	G9NSEKQ01DBQ43|---NA---	110	11.8952	9.99365	1	1	1	10	0	0	0	0	4.57282	11.82	1	2	2.53542	11.82	1	1	2.05084	11.82	1	1	4.20356	11.82	1	2	2.3327	11.82	1	1	0	0	0	0	0	0	0	0	2.16388	11.82	1	1	2.03862	11.82	1	1	0
A0A0C9SBP3	Putative purine nucleoside phosphorylase (Fragment) OS=Amblyomma americanum PE=2 SV=1 - [A0A0C9SBP3_AMBAM]	235	26.1605	8.76318	9	2	2	9	2.71683	3.4	1	1	2.70752	3.4	1	1	2.4827	3.4	1	1	2.76343	3.4	1	1	2.7286	3.4	1	1	5.33016	8.09	2	2	2.42899	3.4	1	1	0	0	0	0	0	0	0	0	3.02389	4.68	1	1	0
A0A023FZL7	Putative heteroproteinous nuclear ribonucleoprotein r rrm superfamily (Fragment) OS=Amblyomma parvum PE=2 SV=1 - [A0A023FZL7_9ACAR]	433	48.6695	7.03467	11	1	1	8	3.29544	3	1	1	2.78677	3	1	1	3.40439	3	1	1	8.38007	3	1	2	3.32521	3	1	1	2.96275	3	1	1	3.39219	3	1	1	0	0	0	0	0	0	0	0	0	0	0	0	0
A0A131YH96	Jade1l protein OS=Rhipicephalus appendiculatus PE=4 SV=1 - [A0A131YH96_RHIAP]	1531	171.203	7.43018	2	1	2	10	2.36261	0.72	1	1	2.04593	0.72	1	1	2.5881	1.11	1	1	5.01204	1.83	2	2	2.53812	1.11	1	1	2.17656	0.72	1	1	0	0	0	0	0	0	0	0	0	0	0	0	2.02937	0.72	1	1	2.00627
A0A131YQN5	Uncharacterized protein OS=Rhipicephalus appendiculatus PE=4 SV=1 - [A0A131YQN5_RHIAP]	837	95.7115	8.79248	2	2	2	8	7.9833	1.31	1	3	0	0	0	0	0	0	0	0	5.65177	1.31	1	2	2.67356	1.31	1	1	2.39185	1.31	1	1	0	0	0	0	0	0	0	0	0	0	0	0	0	0	0	0	2.11618
A0A023GKV2	Putative 26s proteasome regulatory complex subunit psmd5 (Fragment) OS=Amblyomma triste PE=2 SV=1 - [A0A023GKV2_9ACAR]	502	55.4847	6.18896	2	1	1	7	2.38419	3.59	1	1	2.26295	3.59	1	1	2.42579	3.59	1	1	0	0	0	0	4.43057	3.59	1	2	4.60988	3.59	1	2	0	0	0	0	0	0	0	0	0	0	0	0	0	0	0	0	0
A0A0C9SCF9	Proteinral transcription factor iif subunit (Fragment) OS=Amblyomma americanum PE=2 SV=1 - [A0A0C9SCF9_AMBAM]	415	45.8889	5.08447	4	1	1	7	4.41434	3.61	1	2	2.36037	3.61	1	1	0	0	0	0	4.79414	3.61	1	2	2.09206	3.61	1	1	2.5334	3.61	1	1	0	0	0	0	0	0	0	0	0	0	0	0	0	0	0	0	0
A0A0K8R716	Putative phosphatidylinositol transfer protein OS=Ixodes ricinus PE=2 SV=1 - [A0A0K8R716_IXORI]	270	31.2137	6.87354	4	1	1	7	2.11144	3.7	1	1	2.47149	3.7	1	1	2.0849	3.7	1	1	2.08691	3.7	1	1	2.28478	3.7	1	1	4.29746	3.7	1	2	0	0	0	0	0	0	0	0	0	0	0	0	0	0	0	0	0
F0J8G1	Actin filament-coating protein tropomyosin (Fragment) OS=Amblyomma variegatum PE=2 SV=1 - [F0J8G1_AMBVA]	252	29.1339	4.85596	15	1	5	28	2.65115	3.97	1	1	2.58627	3.97	1	1	2.85485	3.97	1	1	2.9488	3.97	1	1	2.63631	3.97	1	1	3.09165	3.97	1	1	10.8792	11.11	4	4	17.182	10.71	3	7	9.28828	13.89	4	4	5.40585	7.54	2	2	5.06591
V5HZI8	Putative 26s protease regulatory subunit 6b-like protein (Fragment) OS=Ixodes ricinus PE=2 SV=1 - [V5HZI8_IXORI]	261	29.5214	8.74854	17	1	3	21	4.86151	8.05	2	2	2.59714	4.6	1	1	0	0	0	0	0	0	0	0	5.03967	8.05	2	2	2.57642	4.6	1	1	7.4007	8.43	3	3	8.97696	8.43	3	4	9.42032	8.43	3	4	2.83148	4.6	1	1	2.65627
isotig02381|---NA---	isotig02381|---NA---	162	17.3762	4.37354	2	2	2	15	2.14331	6.17	1	1	2.20661	6.17	1	1	2.15288	6.17	1	1	0	0	0	0	2.38016	6.17	1	1	4.49778	6.17	1	2	2.8504	8.02	1	1	11.5346	8.02	1	4	2.37373	6.17	1	1	3.17525	8.02	1	1	3.47117
A6NA18	40S ribosomal protein S4 OS=Ornithodoros parkeri PE=2 SV=1 - [A6NA18_ORNPR]	262	29.7333	10.2866	1	1	1	14	2.82523	3.44	1	1	2.2511	3.44	1	1	2.39326	3.44	1	1	2.2489	3.44	1	1	2.40171	3.44	1	1	2.99848	3.44	1	1	2.57744	3.44	1	1	8.00635	3.44	1	3	2.53754	3.44	1	1	2.5434	3.44	1	1	2.20426
isotig23650|vigilin	isotig23650|vigilin	218	22.8334	4.77979	1	4	4	18	2.09983	5.05	1	1	3.1968	5.96	1	1	2.97076	5.96	1	1	3.8376	5.96	1	1	3.3467	5.96	1	1	3.46239	5.96	1	1	11.2834	14.68	3	4	0	0	0	0	0	0	0	0	2.95819	5.96	1	1	3.43326
A0A131Y4W0	Putative phosphoglucomutase/phosphomannomutase (Fragment) OS=Ixodes ricinus PE=2 SV=1 - [A0A131Y4W0_IXORI]	595	67.2637	7.23975	6	2	2	15	2.16048	1.85	1	1	3.05057	1.85	1	1	2.93379	1.85	1	1	2.78952	1.85	1	1	3.01734	1.85	1	1	2.33337	1.85	1	1	5.87684	1.85	1	2	2.65417	1.85	1	1	2.60568	1.85	1	1	4.71135	3.87	2	2	2.71824
A0A023GL50	Eukaryotic translation initiation factor 3 subunit D OS=Amblyomma triste PE=2 SV=1 - [A0A023GL50_9ACAR]	540	61.8517	6.62451	11	4	4	14	0	0	0	0	2.1886	1.67	1	1	4.34122	4.26	2	2	4.23665	3.89	2	2	2.03867	1.67	1	1	0	0	0	0	2.08102	1.67	1	1	2.12776	1.67	1	1	4.65489	4.26	2	2	4.7806	1.67	1	2	0
A0A131XF35	Putative aldehyde dehydrogenase OS=Hyalomma excavatum PE=2 SV=1 - [A0A131XF35_9ACAR]	492	53.4081	6.63916	20	2	3	14	3.26469	2.44	1	1	3.15273	2.44	1	1	3.41205	2.44	1	1	2.82807	2.44	1	1	3.17928	2.44	1	1	3.48909	2.44	1	1	5.97276	2.44	1	2	0	0	0	0	4.35659	2.24	1	2	6.60397	2.44	1	2	2.30571
A6N9S1	Thioredoxin peroxidase OS=Ornithodoros parkeri PE=2 SV=1 - [A6N9S1_ORNPR]	195	21.801	6.06201	3	0	2	13	2.73179	5.13	1	1	3.16736	5.13	1	1	2.98874	5.13	1	1	3.2048	5.13	1	1	3.27889	5.13	1	1	2.77131	5.13	1	1	2.2132	5.13	1	1	2.15028	5.13	1	1	5.69651	10.77	2	2	2.99187	5.13	1	1	3.02362
B7PPQ7	Putative uncharacterized protein OS=Ixodes scapularis GN=IscW_ISCW006131 PE=4 SV=1 - [B7PPQ7_IXOSC]	126	13.8378	4.88135	1	2	2	10	0	0	0	0	4.09198	10.32	1	2	2.01209	10.32	1	1	2.05879	10.32	1	1	4.29644	10.32	1	2	0	0	0	0	2.19399	10.32	1	1	2.34078	10.32	1	1	4.27183	19.84	2	2	0	0	0	0	0
G9NSEKQ01AFPK8	pyruvate muscle	154	17.0986	6.62451	1	1	1	13	3.13466	7.14	1	1	2.84684	7.14	1	1	2.89242	7.14	1	1	3.19075	7.14	1	1	3.22366	7.14	1	1	2.83755	7.14	1	1	3.23194	7.14	1	1	2.8533	7.14	1	1	3.22631	7.14	1	1	3.02509	7.14	1	1	6.11629
B7Q5G4	Endocytosis/signaling protein EHD1, putative OS=Ixodes scapularis GN=IscW_ISCW021581 PE=3 SV=1 - [B7Q5G4_IXOSC]	324	37.4334	7.56201	10	2	2	12	5.10085	6.17	2	2	2.23355	2.47	1	1	0	0	0	0	2.05556	2.47	1	1	2.23735	2.47	1	1	2.2285	2.47	1	1	2.30256	2.47	1	1	2.11872	2.47	1	1	2.40041	2.47	1	1	5.15991	6.17	2	2	0
A0A1E1XJG0	Putative wd40 domain protein (Fragment) OS=Amblyomma sculptum PE=2 SV=1 - [A0A1E1XJG0_9ACAR]	1498	163.149	7.41553	5	2	2	10	2.45221	1.13	1	1	4.60776	1.13	1	2	0	0	0	0	2.44506	1.13	1	1	2.17964	1.13	1	1	2.1042	1.13	1	1	0	0	0	0	0	0	0	0	4.45121	1.8	2	2	2.52847	1.13	1	1	2.32847
A0A131Z1P4	Uncharacterized protein OS=Rhipicephalus appendiculatus PE=4 SV=1 - [A0A131Z1P4_RHIAP]	131	14.167	8.35303	1	1	1	9	2.42222	9.92	1	1	2.06945	9.92	1	1	2.278	9.92	1	1	2.22888	9.92	1	1	4.41429	9.92	1	2	0	0	0	0	2.69646	9.92	1	1	2.04473	9.92	1	1	0	0	0	0	0	0	0	0	2.07294
B7PWZ1	Serine protease, putative (Fragment) OS=Ixodes scapularis GN=IscW_ISCW024505 PE=4 SV=1 - [B7PWZ1_IXOSC]	178	19.7595	9.71533	1	1	1	8	2.78459	9.55	1	1	2.36685	9.55	1	1	2.40822	9.55	1	1	2.36794	9.55	1	1	2.42569	9.55	1	1	2.37488	9.55	1	1	4.75041	9.55	1	2	0	0	0	0	0	0	0	0	0	0	0	0	0
A0A131XVK0	Putative isoleucyl-trna synthetase OS=Ixodes ricinus PE=2 SV=1 - [A0A131XVK0_IXORI]	1049	118.055	6.58057	1	1	1	11	2.8422	1.24	1	1	3.06307	1.24	1	1	3.2919	1.24	1	1	3.3658	1.24	1	1	3.54583	1.24	1	1	3.3447	1.24	1	1	3.24359	1.24	1	1	0	0	0	0	0	0	0	0	2.64526	1.24	1	1	3.3146
A0A131XEL3	Putative carnitine o-acyltransferase crot OS=Hyalomma excavatum PE=2 SV=1 - [A0A131XEL3_9ACAR]	769	88.2831	8.51416	11	2	2	9	2.70571	1.43	1	1	3.23011	1.43	1	1	2.58801	1.43	1	1	3.07808	1.43	1	1	0	0	0	0	4.88056	2.86	2	2	0	0	0	0	0	0	0	0	2.61543	1.43	1	1	2.05041	1.43	1	1	2.64315
B7PPB8	Putative uncharacterized protein (Fragment) OS=Ixodes scapularis GN=IscW_ISCW005707 PE=4 SV=1 - [B7PPB8_IXOSC]	128	13.206	8.08936	1	1	1	9	4.80465	12.5	1	2	0	0	0	0	2.26795	12.5	1	1	2.55994	12.5	1	1	2.17681	12.5	1	1	2.58154	12.5	1	1	2.70478	12.5	1	1	0	0	0	0	0	0	0	0	0	0	0	0	0
G3MKF1	Uncharacterized protein OS=Amblyomma maculatum PE=2 SV=1 - [G3MKF1_9ACAR]	215	24.871	7.51807	1	2	2	8	2.16315	4.65	1	1	4.02299	12.09	2	2	0	0	0	0	2.06718	7.44	1	1	2.15494	7.44	1	1	2.14861	4.65	1	1	0	0	0	0	2.05409	4.65	1	1	0	0	0	0	2.08239	4.65	1	1	0
G9NSEKQ02I0Q0K	importin subunit beta-1	102	11.4276	4.66553	1	1	1	8	0	0	0	0	4.17026	14.71	1	1	7.96332	14.71	1	2	2.85272	14.71	1	1	3.9748	14.71	1	1	3.55152	14.71	1	1	4.06431	14.71	1	1	0	0	0	0	0	0	0	0	0	0	0	0	0
A0A0C9RTQ4	Putative activator of basal transcription (Fragment) OS=Amblyomma americanum PE=2 SV=1 - [A0A0C9RTQ4_AMBAM]	217	24.6081	10.2134	1	1	1	7	2.50855	7.83	1	1	0	0	0	0	4.55136	7.83	1	2	5.2468	7.83	1	2	2.06014	7.83	1	1	0	0	0	0	2.64844	7.83	1	1	0	0	0	0	0	0	0	0	0	0	0	0	0
A0A0K8RHZ8	Putative proteasome assembly chaperone OS=Ixodes ricinus PE=2 SV=1 - [A0A0K8RHZ8_IXORI]	126	14.0181	8.30908	5	1	1	7	0	0	0	0	2.22751	12.7	1	1	4.40883	12.7	1	2	4.31656	12.7	1	2	0	0	0	0	2.30128	12.7	1	1	0	0	0	0	0	0	0	0	2.14382	12.7	1	1	0	0	0	0	0
A0A131Y766	Putative conserved secreted protein (Fragment) OS=Ixodes ricinus PE=2 SV=1 - [A0A131Y766_IXORI]	378	42.9211	8.55811	3	2	2	7	0	0	0	0	2.2174	2.38	1	1	4.19442	2.38	1	2	0	0	0	0	4.25514	6.08	2	2	2.13669	2.38	1	1	0	0	0	0	0	0	0	0	2.26194	2.38	1	1	0	0	0	0	0
A0A131YVE6	Myosin class ii heavy chain OS=Rhipicephalus appendiculatus PE=4 SV=1 - [A0A131YVE6_RHIAP]	1822	209.558	4.91943	1	3	4	7	2.75979	0.6	1	1	2.91754	0.6	1	1	2.03836	0.66	1	1	0	0	0	0	5.3112	1.48	2	2	2.38639	0.6	1	1	0	0	0	0	0	0	0	0	2.01927	0.55	1	1	0	0	0	0	0
A0A1E1XHJ3	Uncharacterized protein (Fragment) OS=Amblyomma aureolatum PE=2 SV=1 - [A0A1E1XHJ3_9ACAR]	298	33.923	8.52881	1	1	1	7	0	0	0	0	2.17125	5.03	1	1	4.10184	5.03	1	2	2.14335	5.03	1	1	4.15081	5.03	1	2	0	0	0	0	2.00699	5.03	1	1	0	0	0	0	0	0	0	0	0	0	0	0	0
A0A023FF33	Putative ribosomal protein l34 OS=Amblyomma cajennense PE=2 SV=1 - [A0A023FF33_9ACAR]	119	13.5867	11.3267	19	2	2	9	2.40804	11.76	1	1	2.04944	6.72	1	1	2.33551	11.76	1	1	0	0	0	0	6.43464	11.76	1	3	0	0	0	0	0	0	0	0	0	0	0	0	0	0	0	0	2.49908	6.72	1	1	2.36741
A0A1E1X641	Putative septins p-loop gtpase (Fragment) OS=Amblyomma aureolatum PE=2 SV=1 - [A0A1E1X641_9ACAR]	395	43.8201	8.38232	4	1	1	9	0	0	0	0	2.36031	4.3	1	1	4.64519	4.3	1	2	2.17128	4.3	1	1	2.12743	4.3	1	1	2.22198	4.3	1	1	0	0	0	0	0	0	0	0	0	0	0	0	0	0	0	0	6.76169
A0A1E1XQ13	Putative tnf receptor-associated factor 6 (Fragment) OS=Amblyomma sculptum PE=2 SV=1 - [A0A1E1XQ13_9ACAR]	446	50.4136	8.55811	1	1	1	6	0	0	0	0	2.19553	3.14	1	1	4.43458	3.14	1	2	0	0	0	0	6.3242	3.14	1	3	0	0	0	0	0	0	0	0	0	0	0	0	0	0	0	0	0	0	0	0	0
B7PYI8	Eukaryotic translation initiation factor, putative OS=Ixodes scapularis GN=IscW_ISCW009912 PE=4 SV=1 - [B7PYI8_IXOSC]	134	15.1456	5.021	1	1	1	6	0	0	0	0	4.2989	10.45	1	2	2.17531	10.45	1	1	0	0	0	0	4.33783	10.45	1	2	2.02667	10.45	1	1	0	0	0	0	0	0	0	0	0	0	0	0	0	0	0	0	0
G9NSEKQ01DRHQZ	juvenile hormone esterase	110	11.6299	6.66846	1	1	1	6	2.03872	13.64	1	1	2.27628	13.64	1	1	2.11333	13.64	1	1	6.17687	13.64	1	3	0	0	0	0	0	0	0	0	0	0	0	0	0	0	0	0	0	0	0	0	0	0	0	0	0
A0A147B888	26s proteasome non atpase regulatory subunit 6 like (Fragment) OS=Carios mimon PE=4 SV=1 - [A0A147B888_9ACAR]	205	23.8252	8.48486	1	1	1	15	3.33314	5.85	1	1	3.81087	5.85	1	1	3.63705	5.85	1	1	0	0	0	0	3.4325	5.85	1	1	3.77637	5.85	1	1	7.09403	5.85	1	2	0	0	0	0	6.36543	5.85	1	2	3.39488	5.85	1	1	6.80288
isotig17598	sodium potassium-transporting atpase subunit beta-2-like	303	34.0376	5.50342	1	2	2	13	2.1401	4.29	1	1	0	0	0	0	4.43789	10.23	2	2	2.65215	4.29	1	1	3.09908	4.29	1	1	0	0	0	0	3.0419	4.29	1	1	0	0	0	0	5.66489	4.29	1	2	3.0986	4.29	1	1	4.56249
A0A0C9S0H3	Histone H2A OS=Amblyomma americanum PE=2 SV=1 - [A0A0C9S0H3_AMBAM]	124	13.3556	10.7261	37	1	2	11	2.27448	7.26	1	1	2.40196	7.26	1	1	2.60824	7.26	1	1	2.2764	7.26	1	1	0	0	0	0	2.8791	7.26	1	1	2.02372	5.65	1	1	2.06538	5.65	1	1	0	0	0	0	2.06735	5.65	1	1	2.01253
A0A023GDK0	Putative cytoplasm to vacuole targeting protein OS=Amblyomma triste PE=2 SV=1 - [A0A023GDK0_9ACAR]	2147	237.694	5.66846	1	1	2	9	0	0	0	0	2.39175	0.75	1	1	4.62942	0.75	1	2	2.55477	0.75	1	1	0	0	0	0	2.34073	0.75	1	1	2.26528	0.75	1	1	2.19851	0.56	1	1	0	0	0	0	2.21894	0.75	1	1	0
A0A090XEI8	Putative p-32 hm (Fragment) OS=Ixodes ricinus PE=2 SV=1 - [A0A090XEI8_IXORI]	693	77.7665	9.20264	4	1	1	7	4.32415	2.02	1	2	2.02013	2.02	1	1	0	0	0	0	4.51655	2.02	1	2	0	0	0	0	0	0	0	0	2.13647	2.02	1	1	0	0	0	0	2.137	2.02	1	1	0	0	0	0	0
A0A0K8RHG3	Putative ubiquitin protein ligase OS=Ixodes ricinus PE=2 SV=1 - [A0A0K8RHG3_IXORI]	151	16.9839	6.56592	6	2	3	8	5.52288	15.23	2	2	2.31403	9.93	1	1	0	0	0	0	3.44658	9.93	1	1	0	0	0	0	2.80803	9.93	1	1	2.13882	5.3	1	1	0	0	0	0	0	0	0	0	0	0	0	0	0
isotig14302|---NA---	isotig14302|---NA---	183	20.7809	6.84424	1	3	4	7	4.40201	8.74	2	2	3.0548	8.74	1	1	0	0	0	0	2.11687	4.37	1	1	0	0	0	0	2.04179	4.37	1	1	0	0	0	0	0	0	0	0	2.07858	4.37	1	1	0	0	0	0	0
A0A090XDT8	Putative at hook (Fragment) OS=Ixodes ricinus PE=2 SV=1 - [A0A090XDT8_IXORI]	1779	193.115	5.61768	2	1	1	6	2.60639	1.01	1	1	0	0	0	0	4.23393	1.01	1	2	2.20238	1.01	1	1	2.47972	1.01	1	1	0	0	0	0	2.41854	1.01	1	1	0	0	0	0	0	0	0	0	0	0	0	0	0
A0A0K8RGG8	Uncharacterized protein OS=Ixodes ricinus PE=2 SV=1 - [A0A0K8RGG8_IXORI]	740	82.4788	6.50732	3	1	1	6	2.08715	1.76	1	1	4.27838	1.76	1	2	0	0	0	0	0	0	0	0	0	0	0	0	4.07755	1.76	1	2	0	0	0	0	2.16355	1.76	1	1	0	0	0	0	0	0	0	0	0
A0A131Y8Q4	Putative regulator of nuclear mrna OS=Ixodes ricinus PE=2 SV=1 - [A0A131Y8Q4_IXORI]	891	96.5654	6.68311	1	2	2	6	2.44566	1.8	1	1	2.26004	1.8	1	1	2.02987	1.8	1	1	0	0	0	0	0	0	0	0	4.04811	1.8	1	2	2.02587	1.91	1	1	0	0	0	0	0	0	0	0	0	0	0	0	0
A0A131YE02	Uncharacterized protein OS=Rhipicephalus appendiculatus PE=4 SV=1 - [A0A131YE02_RHIAP]	87	10.2712	9.36377	1	1	1	6	0	0	0	0	4.56275	18.39	1	2	2.05738	18.39	1	1	2.18122	18.39	1	1	0	0	0	0	2.21994	18.39	1	1	2.00662	18.39	1	1	0	0	0	0	0	0	0	0	0	0	0	0	0
V5I121	Putative tumor necrosis factor receptor (Fragment) OS=Ixodes ricinus PE=2 SV=1 - [V5I121_IXORI]	180	20.207	6.50732	1	1	1	6	2.32618	8.89	1	1	4.06341	8.89	1	2	0	0	0	0	0	0	0	0	4.60131	8.89	1	2	0	0	0	0	0	0	0	0	0	0	0	0	2.0361	8.89	1	1	0	0	0	0	0
A0A0C9SCJ0	Putative 60 kDa chaperonin (Fragment) OS=Amblyomma americanum PE=2 SV=1 - [A0A0C9SCJ0_AMBAM]	464	49.2285	4.95752	1	2	2	9	2.63532	3.66	1	1	3.37546	3.66	1	1	3.26162	3.66	1	1	2.83302	1.94	1	1	0	0	0	0	2.93166	3.66	1	1	0	0	0	0	0	0	0	0	0	0	0	0	3.57831	3.66	1	1	10.0254
A0A023GM10	Putative muscle myosin heavy chain ixodes scapularis muscle myosin heavy chain OS=Amblyomma triste PE=2 SV=1 - [A0A023GM10_9ACAR]	740	83.9024	6.39209	1	2	3	6	2.12485	1.62	1	1	4.58927	1.62	2	2	0	0	0	0	2.03367	1.35	1	1	0	0	0	0	2.2095	1.62	1	1	0	0	0	0	0	0	0	0	0	0	0	0	0	0	0	0	0
A0A090X8E3	Putative rho-associated coiled-coil (Fragment) OS=Ixodes ricinus PE=2 SV=1 - [A0A090X8E3_IXORI]	416	46.3954	5.96045	2	1	1	6	2.12788	2.64	1	1	0	0	0	0	4.13243	2.64	1	2	0	0	0	0	2.06513	2.64	1	1	2.19759	2.64	1	1	0	0	0	0	0	0	0	0	0	0	0	0	0	0	0	0	2.08625
A0A1E1XAJ6	Putative safb-like transcription modulator (Fragment) OS=Amblyomma aureolatum PE=2 SV=1 - [A0A1E1XAJ6_9ACAR]	819	88.9529	9.96436	1	1	2	6	2.21423	1.1	1	1	0	0	0	0	4.25052	1.1	1	2	0	0	0	0	2.05984	1.95	1	1	2.27881	1.1	1	1	0	0	0	0	0	0	0	0	0	0	0	0	0	0	0	0	2.18246
B7QJQ0	Dystroglycan, putative (Fragment) OS=Ixodes scapularis GN=IscW_ISCW015049 PE=4 SV=1 - [B7QJQ0_IXOSC]	835	90.7147	7.09326	5	2	3	6	4.6086	1.44	1	2	0	0	0	0	2.23644	1.44	1	1	2.11206	1.44	1	1	0	0	0	0	2.11148	1.92	1	1	0	0	0	0	0	0	0	0	0	0	0	0	2.65067	2.16	1	1	0
G9NSEKQ02JFJ8D	gastric triacylglycerol lipase	93	10.6	5.35107	1	1	1	6	2.41642	15.05	1	1	2.3561	15.05	1	1	2.14782	15.05	1	1	0	0	0	0	0	0	0	0	4.56696	15.05	1	2	0	0	0	0	0	0	0	0	0	0	0	0	2.39714	15.05	1	1	0
A0A131XZG8	Putative deoxyribodipyrimidine photolyase/cryptochrome (Fragment) OS=Ixodes ricinus PE=2 SV=1 - [A0A131XZG8_IXORI]	448	50.9895	6.75635	1	1	1	5	0	0	0	0	2.28864	2.46	1	1	4.2626	2.46	1	2	0	0	0	0	4.19431	2.46	1	2	0	0	0	0	0	0	0	0	0	0	0	0	0	0	0	0	0	0	0	0	0
A0A131Z9N1	TIL domain containing protein (Fragment) OS=Rhipicephalus appendiculatus PE=4 SV=1 - [A0A131Z9N1_RHIAP]	747	81.7096	7.95752	3	1	1	5	0	0	0	0	2.04834	2.14	1	1	4.0637	2.14	1	2	2.00823	2.14	1	1	0	0	0	0	2.31874	2.14	1	1	0	0	0	0	0	0	0	0	0	0	0	0	0	0	0	0	0
A0A131ZAT3	Uncharacterized protein (Fragment) OS=Rhipicephalus appendiculatus PE=4 SV=1 - [A0A131ZAT3_RHIAP]	87	10.2155	11.5171	1	1	1	5	2.05388	17.24	1	1	4.18074	17.24	1	2	0	0	0	0	2.2476	17.24	1	1	2.17695	17.24	1	1	0	0	0	0	0	0	0	0	0	0	0	0	0	0	0	0	0	0	0	0	0
A0A147BB30	Bifunctional 3 phosphoadenosine 5 phosphosulfate synthase 2 (Fragment) OS=Carios mimon PE=4 SV=1 - [A0A147BB30_9ACAR]	556	62.7274	8.32373	2	1	2	5	0	0	0	0	0	0	0	0	11.7942	2.7	1	3	0	0	0	0	0	0	0	0	5.32441	4.86	2	2	0	0	0	0	0	0	0	0	0	0	0	0	0	0	0	0	0
A0A147BIX9	Putative tick transposon (Fragment) OS=Ixodes ricinus PE=4 SV=1 - [A0A147BIX9_IXORI]	643	73.2433	8.66064	1	1	1	5	2.4725	2.02	1	1	4.67982	2.02	1	2	0	0	0	0	2.62488	2.02	1	1	2.39853	2.02	1	1	0	0	0	0	0	0	0	0	0	0	0	0	0	0	0	0	0	0	0	0	0
A0A1E1XBR7	Defective in cullin neddylation protein OS=Amblyomma aureolatum PE=2 SV=1 - [A0A1E1XBR7_9ACAR]	259	29.8826	6.53662	1	1	1	5	4.58749	6.18	1	2	2.07598	6.18	1	1	0	0	0	0	4.30551	6.18	1	2	0	0	0	0	0	0	0	0	0	0	0	0	0	0	0	0	0	0	0	0	0	0	0	0	0
A0A1E1XVE6	Putative low-density lipoprotein receptor-related protein 1b (Fragment) OS=Amblyomma sculptum PE=2 SV=1 - [A0A1E1XVE6_9ACAR]	841	92.6923	7.03467	1	1	1	5	4.37383	1.55	1	2	2.03347	1.55	1	1	0	0	0	0	2.1577	1.55	1	1	2.12867	1.55	1	1	0	0	0	0	0	0	0	0	0	0	0	0	0	0	0	0	0	0	0	0	0
B7P1P6	Putative uncharacterized protein OS=Ixodes scapularis GN=IscW_ISCW015797 PE=4 SV=1 - [B7P1P6_IXOSC]	125	14.2775	9.78857	1	1	1	5	0	0	0	0	2.26474	9.6	1	1	4.21506	9.6	1	2	2.03766	9.6	1	1	0	0	0	0	2.37039	9.6	1	1	0	0	0	0	0	0	0	0	0	0	0	0	0	0	0	0	0
L7M0M2	Putative tick transposon OS=Rhipicephalus pulchellus PE=2 SV=1 - [L7M0M2_9ACAR]	282	30.9245	7.72314	1	1	1	5	0	0	0	0	4.96989	4.96	1	2	2.52097	4.96	1	1	0	0	0	0	2.61511	4.96	1	1	2.81018	4.96	1	1	0	0	0	0	0	0	0	0	0	0	0	0	0	0	0	0	0
L7MH93	Putative thyroid hormone receptor-associated protein complex subunit (Fragment) OS=Rhipicephalus pulchellus PE=2 SV=1 - [L7MH93_9ACAR]	2215	239.067	7.1958	4	2	3	5	4.67696	1.13	2	2	2.11384	0.54	1	1	0	0	0	0	0	0	0	0	4.53509	1.31	2	2	0	0	0	0	0	0	0	0	0	0	0	0	0	0	0	0	0	0	0	0	0
A0A1E1XVL3	Uncharacterized protein (Fragment) OS=Amblyomma sculptum PE=2 SV=1 - [A0A1E1XVL3_9ACAR]	192	20.6183	5.43994	1	1	1	8	2.40519	6.25	1	1	2.00724	6.25	1	1	2.53258	6.25	1	1	0	0	0	0	2.48584	6.25	1	1	0	0	0	0	4.82769	6.25	1	2	0	0	0	0	0	0	0	0	4.79328	6.25	1	2	0
B7PK25	Putative uncharacterized protein OS=Ixodes scapularis GN=IscW_ISCW004665 PE=4 SV=1 - [B7PK25_IXOSC]	125	14.3749	10.5356	1	1	1	7	6.79627	9.6	1	3	0	0	0	0	0	0	0	0	2.06272	9.6	1	1	0	0	0	0	0	0	0	0	0	0	0	0	2.08139	9.6	1	1	2.23481	9.6	1	1	0	0	0	0	2.0891
A0A131XFC3	Putative cortactin OS=Hyalomma excavatum PE=2 SV=1 - [A0A131XFC3_9ACAR]	559	62.2948	5.38916	5	1	1	6	0	0	0	0	2.06483	2.33	1	1	4.65584	2.33	1	2	2.17276	2.33	1	1	0	0	0	0	0	0	0	0	4.21151	2.33	1	2	0	0	0	0	0	0	0	0	0	0	0	0	0
A0A131YN91	Advillin OS=Rhipicephalus appendiculatus PE=4 SV=1 - [A0A131YN91_RHIAP]	845	95.1244	6.40479	8	1	3	6	6.3741	4.73	3	3	0	0	0	0	0	0	0	0	2.02334	1.42	1	1	0	0	0	0	0	0	0	0	2.17565	1.42	1	1	0	0	0	0	2.18183	1.42	1	1	0	0	0	0	0
B7Q187	Neurogenin-2, putative OS=Ixodes scapularis GN=IscW_ISCW020498 PE=4 SV=1 - [B7Q187_IXOSC]	292	31.0402	7.73779	1	1	1	6	0	0	0	0	4.32111	4.79	1	2	2.09171	4.79	1	1	0	0	0	0	2.06606	4.79	1	1	0	0	0	0	4.3821	4.79	1	2	0	0	0	0	0	0	0	0	0	0	0	0	0
G3MG20	Uncharacterized protein (Fragment) OS=Amblyomma maculatum PE=2 SV=1 - [G3MG20_9ACAR]	673	75.5315	8.19189	1	1	1	6	2.10966	2.23	1	1	2.61874	2.23	1	1	2.00568	2.23	1	1	0	0	0	0	2.63554	2.23	1	1	0	0	0	0	5.08121	2.23	1	2	0	0	0	0	0	0	0	0	0	0	0	0	0
B7PMB5	Phosphatidylinositol-binding clathrin assembly protein, putative OS=Ixodes scapularis GN=IscW_ISCW006457 PE=4 SV=1 - [B7PMB5_IXOSC]	821	86.4635	8.5874	3	2	2	8	2.33234	1.83	1	1	0	0	0	0	4.77152	1.83	1	2	2.1696	2.19	1	1	0	0	0	0	0	0	0	0	2.01197	1.83	1	1	0	0	0	0	0	0	0	0	0	0	0	0	2.11962
A0A023GGA4	Putative rna-binding protein sart3 rrm superfamily (Fragment) OS=Amblyomma triste PE=2 SV=1 - [A0A023GGA4_9ACAR]	691	78.5831	7.72314	1	1	3	6	2.04735	2.46	1	1	0	0	0	0	4.12181	2.46	1	2	0	0	0	0	0	0	0	0	2.28291	2.46	1	1	2.1165	2.03	1	1	0	0	0	0	0	0	0	0	0	0	0	0	0
A0A090X9N2	Putative rrna-processing protein fcf1 (Fragment) OS=Ixodes ricinus PE=2 SV=1 - [A0A090X9N2_IXORI]	207	24.1295	9.67139	1	1	1	6	2.01281	5.31	1	1	0	0	0	0	4.15402	5.31	1	2	0	0	0	0	2.22687	5.31	1	1	0	0	0	0	0	0	0	0	0	0	0	0	2.41683	5.31	1	1	0	0	0	0	2.04536
A0A131ZB77	Scaffold attachment factor b (Fragment) OS=Rhipicephalus appendiculatus PE=4 SV=1 - [A0A131ZB77_RHIAP]	924	100.257	9.5835	3	1	2	6	2.21423	0.97	1	1	0	0	0	0	4.25052	0.97	1	2	0	0	0	0	0	0	0	0	2.27881	0.97	1	1	2.31912	1.19	1	1	0	0	0	0	0	0	0	0	0	0	0	0	2.18246
A0A131YFF8	Uncharacterized protein OS=Rhipicephalus appendiculatus PE=4 SV=1 - [A0A131YFF8_RHIAP]	699	77.7529	7.34229	2	2	2	5	0	0	0	0	4.26737	3.86	2	2	2.37577	2	1	1	0	0	0	0	0	0	0	0	2.04982	2	1	1	2.07502	2	1	1	0	0	0	0	0	0	0	0	0	0	0	0	0
A0A131YJ38	DNA mismatch repair protein MSH2 OS=Rhipicephalus appendiculatus PE=3 SV=1 - [A0A131YJ38_RHIAP]	865	95.3841	5.87158	1	2	2	5	0	0	0	0	4.06127	2.89	2	2	2.51891	1.16	1	1	0	0	0	0	0	0	0	0	2.03568	1.16	1	1	2.03996	1.73	1	1	0	0	0	0	0	0	0	0	0	0	0	0	0
A0A147BAZ1	Putative retrovirus-related pol polyprotein from transposon (Fragment) OS=Ixodes ricinus PE=4 SV=1 - [A0A147BAZ1_IXORI]	1183	133.035	8.47021	1	2	2	5	0	0	0	0	4.16254	1.18	1	2	2.09014	1.18	1	1	2.12725	1.18	1	1	0	0	0	0	0	0	0	0	0	0	0	0	2.03647	0.76	1	1	0	0	0	0	0	0	0	0	0
A0A147BHL3	Putative e3 ubiquitin-protein ligase huwe1 isoform x2 (Fragment) OS=Ixodes ricinus PE=4 SV=1 - [A0A147BHL3_IXORI]	996	104.179	5.18604	2	1	1	5	4.04525	1.61	1	2	2.02147	1.61	1	1	0	0	0	0	2.08027	1.61	1	1	0	0	0	0	0	0	0	0	2.20729	1.61	1	1	0	0	0	0	0	0	0	0	0	0	0	0	0
A0A1E1XGW2	Putative methylase (Fragment) OS=Amblyomma aureolatum PE=2 SV=1 - [A0A1E1XGW2_9ACAR]	297	33.0835	5.2749	1	1	1	5	2.06792	3.37	1	1	0	0	0	0	4.49109	3.37	1	2	0	0	0	0	0	0	0	0	2.0319	3.37	1	1	2.00186	3.37	1	1	0	0	0	0	0	0	0	0	0	0	0	0	0
L7LRY8	Peptidyl-prolyl cis-trans isomerase OS=Rhipicephalus pulchellus PE=2 SV=1 - [L7LRY8_9ACAR]	188	20.1959	8.74854	1	1	1	7	2.09799	4.79	1	1	4.62492	4.79	1	2	0	0	0	0	0	0	0	0	0	0	0	0	2.3977	4.79	1	1	0	0	0	0	0	0	0	0	0	0	0	0	2.58147	4.79	1	1	2.40739
B7QGG8	Ubiquitin carboxyl-terminal hydrolase (Fragment) OS=Ixodes scapularis GN=IscW_ISCW022153 PE=3 SV=1 - [B7QGG8_IXOSC]	377	43.0684	7.63525	1	1	1	6	2.03478	2.65	1	1	2.07379	2.65	1	1	2.12446	2.65	1	1	0	0	0	0	2.08713	2.65	1	1	0	0	0	0	0	0	0	0	0	0	0	0	0	0	0	0	0	0	0	0	4.28513
Q4PM65	40S ribosomal protein S12 OS=Ixodes scapularis PE=2 SV=1 - [Q4PM65_IXOSC]	132	14.3752	6.99072	8	2	2	5	2.20094	8.33	1	1	0	0	0	0	4.3489	18.18	2	2	2.0347	8.33	1	1	0	0	0	0	0	0	0	0	0	0	0	0	0	0	0	0	0	0	0	0	0	0	0	0	2.172
A0A0K8RQH9	Putative secreted protein (Fragment) OS=Ixodes ricinus PE=2 SV=1 - [A0A0K8RQH9_IXORI]	213	24.4352	9.48096	1	1	1	4	2.07244	7.51	1	1	4.16773	7.51	1	2	0	0	0	0	0	0	0	0	0	0	0	0	2.14166	7.51	1	1	0	0	0	0	0	0	0	0	0	0	0	0	0	0	0	0	0
A0A131X8M7	Putative adenine deaminase/adenosine deaminase OS=Hyalomma excavatum PE=2 SV=1 - [A0A131X8M7_9ACAR]	358	40.1214	6.53662	1	1	1	4	0	0	0	0	2.08175	4.47	1	1	4.74551	4.47	1	2	0	0	0	0	2.35298	4.47	1	1	0	0	0	0	0	0	0	0	0	0	0	0	0	0	0	0	0	0	0	0	0
A0A131XZ72	Putative cysteinyl-trna synthetase OS=Ixodes ricinus PE=2 SV=1 - [A0A131XZ72_IXORI]	536	59.1142	8.1333	3	1	1	4	2.29069	2.05	1	1	0	0	0	0	4.38714	2.05	1	2	0	0	0	0	0	0	0	0	2.0545	2.05	1	1	0	0	0	0	0	0	0	0	0	0	0	0	0	0	0	0	0
A0A131YZE2	Scavenger receptor class a like c type lectin OS=Rhipicephalus appendiculatus PE=4 SV=1 - [A0A131YZE2_RHIAP]	2825	319.373	6.53662	1	1	3	4	0	0	0	0	4.13182	0.35	1	2	2.20991	0.6	1	1	2.04275	0.39	1	1	0	0	0	0	0	0	0	0	0	0	0	0	0	0	0	0	0	0	0	0	0	0	0	0	0
A0A147B6Y7	Rna polymerase ii protein ral transcription factor (Fragment) OS=Carios mimon PE=4 SV=1 - [A0A147B6Y7_9ACAR]	106	11.4889	8.99756	1	1	1	4	4.03604	16.04	1	2	2.17633	16.04	1	1	0	0	0	0	0	0	0	0	0	0	0	0	2.27749	16.04	1	1	0	0	0	0	0	0	0	0	0	0	0	0	0	0	0	0	0
A0A147BJU4	Putative piggybac transposable element-derived (Fragment) OS=Ixodes ricinus PE=4 SV=1 - [A0A147BJU4_IXORI]	446	51.2176	9.08545	1	1	1	4	0	0	0	0	2.14617	3.14	1	1	4.37122	3.14	1	2	0	0	0	0	2.28319	3.14	1	1	0	0	0	0	0	0	0	0	0	0	0	0	0	0	0	0	0	0	0	0	0
A0A1E1X382	Putative ecdysone receptor (Fragment) OS=Amblyomma aureolatum PE=2 SV=1 - [A0A1E1X382_9ACAR]	426	46.2097	8.33838	2	1	1	4	0	0	0	0	2.22247	2.82	1	1	4.53936	2.82	1	2	0	0	0	0	0	0	0	0	2.0422	2.82	1	1	0	0	0	0	0	0	0	0	0	0	0	0	0	0	0	0	0
A0A1E1X8P5	Putative nonsense-mediated mrna decay 2 protein OS=Amblyomma aureolatum PE=2 SV=1 - [A0A1E1X8P5_9ACAR]	1260	142.949	5.37646	5	1	3	4	0	0	0	0	0	0	0	0	4.42667	2.38	2	3	0	0	0	0	0	0	0	0	2.01946	0.87	1	1	0	0	0	0	0	0	0	0	0	0	0	0	0	0	0	0	0
A0A1E1XMC9	DNA helicase (Fragment) OS=Amblyomma sculptum PE=2 SV=1 - [A0A1E1XMC9_9ACAR]	919	103.675	5.42725	3	1	2	4	4.48404	1.96	2	2	0	0	0	0	2.31523	0.87	1	1	0	0	0	0	0	0	0	0	2.445	1.09	1	1	0	0	0	0	0	0	0	0	0	0	0	0	0	0	0	0	0
A0A1E1XVV7	Putative tick transposon (Fragment) OS=Amblyomma sculptum PE=2 SV=1 - [A0A1E1XVV7_9ACAR]	225	24.7441	10.0376	1	1	1	4	4.35127	6.67	1	2	0	0	0	0	2.10142	6.67	1	1	0	0	0	0	0	0	0	0	2.38439	6.67	1	1	0	0	0	0	0	0	0	0	0	0	0	0	0	0	0	0	0
B7PB10	Putative uncharacterized protein OS=Ixodes scapularis GN=IscW_ISCW017511 PE=4 SV=1 - [B7PB10_IXOSC]	540	58.7641	4.80518	2	2	3	4	0	0	0	0	2.00322	2.22	1	1	4.19079	2.78	1	2	2.20841	3.15	1	1	0	0	0	0	0	0	0	0	0	0	0	0	0	0	0	0	0	0	0	0	0	0	0	0	0
B7QGJ0	tRNA pseudouridine synthase D, putative OS=Ixodes scapularis GN=IscW_ISCW022401 PE=3 SV=1 - [B7QGJ0_IXOSC]	549	60.9777	8.44092	2	1	1	4	0	0	0	0	2.06775	2.91	1	1	4.33069	2.91	1	2	0	0	0	0	2.12405	2.91	1	1	0	0	0	0	0	0	0	0	0	0	0	0	0	0	0	0	0	0	0	0	0
L7MB94	Putative spatacsin (Fragment) OS=Rhipicephalus pulchellus PE=2 SV=1 - [L7MB94_9ACAR]	696	78.0776	6.18896	4	1	1	4	2.16451	1.72	1	1	4.18878	1.72	1	2	0	0	0	0	0	0	0	0	2.01407	1.72	1	1	0	0	0	0	0	0	0	0	0	0	0	0	0	0	0	0	0	0	0	0	0
L7MFY2	Uncharacterized protein (Fragment) OS=Rhipicephalus pulchellus PE=2 SV=1 - [L7MFY2_9ACAR]	1025	111.067	4.69092	1	1	1	4	4.51427	1.76	1	2	2.01907	1.76	1	1	0	0	0	0	0	0	0	0	0	0	0	0	2.08234	1.76	1	1	0	0	0	0	0	0	0	0	0	0	0	0	0	0	0	0	0
V5HH99	Uncharacterized protein (Fragment) OS=Ixodes ricinus PE=2 SV=1 - [V5HH99_IXORI]	177	21.0048	10.2134	1	1	1	4	4.83084	10.17	1	2	0	0	0	0	2.13117	10.17	1	1	0	0	0	0	0	0	0	0	2.09487	10.17	1	1	0	0	0	0	0	0	0	0	0	0	0	0	0	0	0	0	0
A0A147B819	Alpha-1,4 glucan phosphorylase (Fragment) OS=Carios mimon PE=3 SV=1 - [A0A147B819_9ACAR]	748	86.2287	9.30518	2	0	3	19	2.0546	1.6	1	1	2.08269	1.6	1	1	2.27241	1.6	1	1	0	0	0	0	0	0	0	0	0	0	0	0	7.54346	3.74	2	3	6.80153	2.67	2	3	2.21181	1.6	1	1	7.60663	4.81	3	3	4.11891
Q4PMC4	Ribosomal protein L12 OS=Ixodes scapularis GN=IscW_ISCW004058 PE=2 SV=1 - [Q4PMC4_IXOSC]	165	17.8266	9.1001	13	2	3	13	3.37587	9.09	1	1	2.65499	9.09	1	1	2.09105	9.09	1	1	0	0	0	0	0	0	0	0	0	0	0	0	7.99363	24.24	3	3	0	0	0	0	6.94476	9.09	1	2	6.52016	9.09	1	2	3.984
A0A023FZT0	Putative histidyl-trna synthetase OS=Amblyomma parvum PE=2 SV=1 - [A0A023FZT0_9ACAR]	507	57.3407	7.56201	15	2	4	8	0	0	0	0	4.6225	4.34	2	2	2.71949	1.78	1	1	0	0	0	0	0	0	0	0	0	0	0	0	9.58772	8.09	3	3	0	0	0	0	0	0	0	0	2.17587	1.78	1	1	0
A0A1E1XEY0	Putative histidyl-trna synthetase OS=Amblyomma aureolatum PE=2 SV=1 - [A0A1E1XEY0_9ACAR]	507	57.3656	7.38623	13	1	3	7	2.08442	2.56	1	1	2.5721	1.78	1	1	2.71949	1.78	1	1	0	0	0	0	0	0	0	0	0	0	0	0	6.39776	4.93	2	2	0	0	0	0	0	0	0	0	2.17587	1.78	1	1	0
B7PNJ8	Low-density lipoprotein receptor, putative OS=Ixodes scapularis GN=IscW_ISCW006333 PE=4 SV=1 - [B7PNJ8_IXOSC]	1753	190.847	5.05908	2	2	2	6	0	0	0	0	2.12675	0.74	1	1	4.55836	0.74	1	2	0	0	0	0	0	0	0	0	0	0	0	0	2.08957	0.91	1	1	0	0	0	0	2.08811	0.74	1	1	0	0	0	0	2.1007
A0A0C9SD11	Putative uridylate kinase/adenylate kinase (Fragment) OS=Amblyomma americanum PE=2 SV=1 - [A0A0C9SD11_AMBAM]	191	21.395	5.38916	6	2	2	6	0	0	0	0	2.04253	5.76	1	1	4.1677	5.76	1	2	0	0	0	0	0	0	0	0	0	0	0	0	2.15035	4.71	1	1	0	0	0	0	0	0	0	0	2.14958	4.71	1	1	0
A0A131YX69	Cytosol aminopeptidase OS=Rhipicephalus appendiculatus PE=3 SV=1 - [A0A131YX69_RHIAP]	525	56.1749	7.09326	1	1	1	6	3.06384	2.86	1	1	2.55026	2.86	1	1	3.05333	2.86	1	1	0	0	0	0	0	0	0	0	0	0	0	0	0	0	0	0	0	0	0	0	2.8647	2.86	1	1	0	0	0	0	4.86248
A0A1E1XFG4	Putative tick transposon (Fragment) OS=Amblyomma aureolatum PE=2 SV=1 - [A0A1E1XFG4_9ACAR]	1160	131.54	9.1001	1	2	3	5	4.45311	2.5	2	2	0	0	0	0	2.55692	1.38	1	1	0	0	0	0	0	0	0	0	0	0	0	0	2.33849	1.03	1	1	0	0	0	0	0	0	0	0	0	0	0	0	0
A0A147BA21	T-complex protein 1 subunit gamma (Fragment) OS=Carios mimon PE=3 SV=1 - [A0A147BA21_9ACAR]	394	43.7409	7.53271	2	1	3	7	2.26518	2.28	1	1	2.16339	2.28	1	1	2.15269	2.28	1	1	0	0	0	0	0	0	0	0	0	0	0	0	0	0	0	0	0	0	0	0	0	0	0	0	4.21564	4.82	2	2	2.00732
A0A131Y3G8	Putative ca2+-binding actin-bundling protein (Fragment) OS=Ixodes ricinus PE=2 SV=1 - [A0A131Y3G8_IXORI]	3409	388.053	6.44287	3	2	3	5	2.01438	0.53	1	1	0	0	0	0	2.27888	0.23	1	2	0	0	0	0	0	0	0	0	0	0	0	0	0	0	0	0	0	0	0	0	0	0	0	0	2.10823	0.29	1	1	2.25813
A0A131Z7W7	Short stop (Fragment) OS=Rhipicephalus appendiculatus PE=4 SV=1 - [A0A131Z7W7_RHIAP]	4319	480.375	6.94678	5	2	4	5	0	0	0	0	4.52815	0.6	2	2	2.13021	0.28	1	1	0	0	0	0	0	0	0	0	0	0	0	0	0	0	0	0	0	0	0	0	0	0	0	0	2.11602	0.23	1	1	0
A0A131YMY3	Uncharacterized protein OS=Rhipicephalus appendiculatus PE=4 SV=1 - [A0A131YMY3_RHIAP]	314	34.4583	9.99365	1	1	2	4	0	0	0	0	4.66467	6.05	1	2	2.40346	6.05	1	1	0	0	0	0	0	0	0	0	0	0	0	0	0	0	0	0	0	0	0	0	0	0	0	0	0	0	0	0	0
B7Q253	Beta-ketoacyl-ACP reductase, putative OS=Ixodes scapularis GN=IscW_ISCW009739 PE=4 SV=1 - [B7Q253_IXOSC]	166	17.576	5.32568	1	1	1	4	5.47392	8.43	1	2	0	0	0	0	2.65641	8.43	1	1	0	0	0	0	0	0	0	0	0	0	0	0	0	0	0	0	0	0	0	0	0	0	0	0	2.58246	8.43	1	1	0
B7QMK0	Dipeptidyl peptidase IV, putative (Fragment) OS=Ixodes scapularis GN=IscW_ISCW023102 PE=4 SV=1 - [B7QMK0_IXOSC]	735	82.9379	7.21045	1	1	1	4	0	0	0	0	2.48485	1.77	1	1	4.66913	1.77	1	2	0	0	0	0	0	0	0	0	0	0	0	0	0	0	0	0	0	0	0	0	0	0	0	0	0	0	0	0	2.1524
L7MF28	Putative a2iv collagen (Fragment) OS=Rhipicephalus pulchellus PE=2 SV=1 - [L7MF28_9ACAR]	1790	176.006	6.85889	2	2	2	4	0	0	0	0	4.81931	2.01	2	2	2.49493	0.73	1	1	0	0	0	0	0	0	0	0	0	0	0	0	0	0	0	0	0	0	0	0	0	0	0	0	0	0	0	0	0
A0A023FIS6	Putative transcription initiation factor (Fragment) OS=Amblyomma cajennense PE=2 SV=1 - [A0A023FIS6_9ACAR]	320	34.9216	5.07178	1	1	1	3	4.37152	4.38	1	2	2.09985	4.38	1	1	0	0	0	0	0	0	0	0	0	0	0	0	0	0	0	0	0	0	0	0	0	0	0	0	0	0	0	0	0	0	0	0	0
A0A023GI54	Putative e3 ubiquitin ligase ixodes scapularis e3 ubiquitin ligase OS=Amblyomma triste PE=2 SV=1 - [A0A023GI54_9ACAR]	189	21.5276	7.81104	1	1	1	3	2.06972	7.94	1	1	4.11728	7.94	1	2	0	0	0	0	0	0	0	0	0	0	0	0	0	0	0	0	0	0	0	0	0	0	0	0	0	0	0	0	0	0	0	0	0
A0A090XEF4	Uncharacterized protein (Fragment) OS=Ixodes ricinus PE=2 SV=1 - [A0A090XEF4_IXORI]	122	13.3707	8.19189	1	1	1	3	4.19877	13.11	1	2	2.05559	13.11	1	1	0	0	0	0	0	0	0	0	0	0	0	0	0	0	0	0	0	0	0	0	0	0	0	0	0	0	0	0	0	0	0	0	0
A0A131XEP0	Uncharacterized protein (Fragment) OS=Hyalomma excavatum PE=2 SV=1 - [A0A131XEP0_9ACAR]	1713	185.663	5.0083	1	1	1	3	4.07754	0.88	1	3	0	0	0	0	0	0	0	0	0	0	0	0	0	0	0	0	0	0	0	0	0	0	0	0	0	0	0	0	0	0	0	0	0	0	0	0	0
A0A131Y7N1	Putative sorting nexin-24 OS=Ixodes ricinus PE=2 SV=1 - [A0A131Y7N1_IXORI]	166	18.8748	9.40771	2	1	1	3	2.5776	7.83	1	1	5.09341	7.83	1	2	0	0	0	0	0	0	0	0	0	0	0	0	0	0	0	0	0	0	0	0	0	0	0	0	0	0	0	0	0	0	0	0	0
A0A131YIG0	Round spermatid basic protein 1-like protein OS=Rhipicephalus appendiculatus PE=4 SV=1 - [A0A131YIG0_RHIAP]	1722	181.13	8.98291	1	1	1	3	6.71195	0.81	1	3	0	0	0	0	0	0	0	0	0	0	0	0	0	0	0	0	0	0	0	0	0	0	0	0	0	0	0	0	0	0	0	0	0	0	0	0	0
A0A131YQH0	Basic tail secreted protein OS=Rhipicephalus appendiculatus PE=4 SV=1 - [A0A131YQH0_RHIAP]	479	52.0257	8.42627	1	1	1	3	4.15096	2.71	1	2	2.10727	2.71	1	1	0	0	0	0	0	0	0	0	0	0	0	0	0	0	0	0	0	0	0	0	0	0	0	0	0	0	0	0	0	0	0	0	0
A0A131Z6X7	Enhancer of mRNA-decapping protein 4 OS=Rhipicephalus appendiculatus PE=4 SV=1 - [A0A131Z6X7_RHIAP]	1289	139.173	5.31299	2	1	2	3	4.60112	2.33	2	2	0	0	0	0	2.02596	1.24	1	1	0	0	0	0	0	0	0	0	0	0	0	0	0	0	0	0	0	0	0	0	0	0	0	0	0	0	0	0	0
A0A147B7F2	E3 ubiquitin protein ligase huwe1 (Fragment) OS=Carios mimon PE=4 SV=1 - [A0A147B7F2_9ACAR]	211	22.7706	5.98584	1	1	1	3	0	0	0	0	4.40842	8.53	1	2	2.04846	8.53	1	1	0	0	0	0	0	0	0	0	0	0	0	0	0	0	0	0	0	0	0	0	0	0	0	0	0	0	0	0	0
B7QDB0	Actin-related protein 2/3 complex subunit 4 OS=Ixodes scapularis GN=IscW_ISCW022611 PE=3 SV=1 - [B7QDB0_IXOSC]	164	19.0948	7.02002	4	1	1	3	0	0	0	0	4.69414	9.76	1	2	2.06479	9.76	1	1	0	0	0	0	0	0	0	0	0	0	0	0	0	0	0	0	0	0	0	0	0	0	0	0	0	0	0	0	0
G3MI25	Uncharacterized protein (Fragment) OS=Amblyomma maculatum PE=2 SV=1 - [G3MI25_9ACAR]	476	52.7298	6.72705	2	2	2	3	2.06452	2.52	1	1	0	0	0	0	4.26461	5.88	2	2	0	0	0	0	0	0	0	0	0	0	0	0	0	0	0	0	0	0	0	0	0	0	0	0	0	0	0	0	0
L7MCY9	Putative tick transposon (Fragment) OS=Rhipicephalus pulchellus PE=2 SV=1 - [L7MCY9_9ACAR]	858	98.3808	9.05615	1	2	2	3	4.52476	3.85	2	2	0	0	0	0	2.1343	1.86	1	1	0	0	0	0	0	0	0	0	0	0	0	0	0	0	0	0	0	0	0	0	0	0	0	0	0	0	0	0	0
Q6PRC9	Putative uncharacterized protein OS=Ornithodoros moubata PE=2 SV=1 - [Q6PRC9_ORNMO]	350	38.7759	5.35107	1	2	2	3	0	0	0	0	2.00169	2.29	1	1	4.57912	7.43	2	2	0	0	0	0	0	0	0	0	0	0	0	0	0	0	0	0	0	0	0	0	0	0	0	0	0	0	0	0	0
V5HX78	Putative kinase-like protein OS=Ixodes ricinus PE=2 SV=1 - [V5HX78_IXORI]	540	59.9769	8.73389	3	2	2	3	2.23773	2.78	1	1	0	0	0	0	4.16177	5.19	2	2	0	0	0	0	0	0	0	0	0	0	0	0	0	0	0	0	0	0	0	0	0	0	0	0	0	0	0	0	0
isotig03009	epididymal secretory protein e1 precursor	179	19.6168	4.67822	4	6	6	50	3.63457	7.26	1	1	4.16293	10.61	1	1	0	0	0	0	5.8827	15.64	2	2	14.1152	22.91	3	4	11.2938	17.88	2	3	17.222	29.61	4	5	2.42757	6.7	1	1	25.5317	29.61	5	8	23.8309	34.64	5	7	32.9817
isotig03861	amblyomma 40-33 family member	214	23.1099	9.99365	4	1	2	17	6.74087	14.95	2	2	0	0	0	0	0	0	0	0	3.68527	6.54	1	1	14.5621	14.95	2	4	9.25487	14.95	2	3	7.31518	14.95	2	2	0	0	0	0	8.27758	6.54	1	2	3.97071	6.54	1	1	7.41435
isotig06466	conserved secreted partial	700	76.7995	7.09326	1	6	6	22	0	0	0	0	0	0	0	0	4.84375	1.86	1	2	0	0	0	0	14.596	4.14	2	4	9.22558	6.71	3	3	15.7454	5.43	3	5	4.92747	1.86	1	2	0	0	0	0	9.91641	5	3	4	2.22556
V5HZ39	Putative sulfatase (Fragment) OS=Ixodes ricinus PE=2 SV=1 - [V5HZ39_IXORI]	525	60.8732	6.78564	1	2	2	8	0	0	0	0	4.16711	4.95	2	2	0	0	0	0	0	0	0	0	6.32268	4.95	2	3	6.22345	4.95	2	3	0	0	0	0	0	0	0	0	0	0	0	0	0	0	0	0	0
A0A131Y0J3	Putative aldehyde dehydrogenase (Fragment) OS=Ixodes ricinus PE=2 SV=1 - [A0A131Y0J3_IXORI]	544	58.709	6.78564	14	2	4	25	2.16396	2.02	1	1	2.22313	2.02	1	1	0	0	0	0	4.47753	3.68	2	2	2.0724	1.65	1	1	4.6488	3.68	2	2	3.93479	2.39	1	1	7.93538	4.41	2	3	8.31845	4.41	2	3	8.49738	6.43	3	3	7.42222
A0A131XBM8	Rab GDP dissociation inhibitor OS=Hyalomma excavatum PE=2 SV=1 - [A0A131XBM8_9ACAR]	443	49.759	5.65576	8	2	2	14	2.55642	2.26	1	1	2.82394	2.26	1	1	0	0	0	0	4.73008	2.26	1	2	2.0844	2.26	1	1	4.84034	4.29	2	2	0	0	0	0	6.48195	2.26	1	3	0	0	0	0	0	0	0	0	4.33717
F0J921	Rab6 subfamily protein (Fragment) OS=Amblyomma variegatum PE=2 SV=1 - [F0J921_AMBVA]	174	19.8612	8.85107	85	1	3	13	2.74435	6.32	1	1	0	0	0	0	2.81808	6.32	1	1	4.77853	13.22	2	2	2.491	6.32	1	1	4.90796	12.64	2	2	2.56388	6.32	1	1	2.21627	6.32	1	1	2.60023	6.32	1	1	2.83002	6.32	1	1	2.33071
B7Q1I8	Rho GDP dissociation inhibitor, putative (Fragment) OS=Ixodes scapularis GN=IscW_ISCW020878 PE=4 SV=1 - [B7Q1I8_IXOSC]	206	23.5269	5.2876	4	1	1	10	2.49906	5.34	1	1	2.34404	5.34	1	1	0	0	0	0	8.00872	5.34	1	3	2.2178	5.34	1	1	2.07417	5.34	1	1	0	0	0	0	0	0	0	0	5.20463	5.34	1	3	0	0	0	0	0
A0A131XS85	Adenosylhomocysteinase (Fragment) OS=Hyalomma excavatum PE=2 SV=1 - [A0A131XS85_9ACAR]	457	50.6554	6.68311	16	4	4	12	2.6811	2.63	1	1	2.7748	2.63	1	1	0	0	0	0	0	0	0	0	8.55872	9.19	3	3	4.73955	5.69	2	2	2.0172	1.75	1	1	0	0	0	0	2.69352	2.63	1	1	2.67481	2.63	1	1	0
A0A023FET2	Putative pre-mrna splicing factor sf3b 10 kDa subunit OS=Amblyomma cajennense PE=2 SV=1 - [A0A023FET2_9ACAR]	85	9.92278	6.354	7	1	1	8	2.62155	20	1	1	0	0	0	0	2.36139	20	1	1	4.71927	20	1	2	4.74946	20	1	2	2.04188	20	1	1	2.213	20	1	1	0	0	0	0	0	0	0	0	0	0	0	0	0
A0A131YL77	Supervillin OS=Rhipicephalus appendiculatus PE=4 SV=1 - [A0A131YL77_RHIAP]	1170	127.077	8.82178	1	1	1	7	0	0	0	0	0	0	0	0	4.27953	1.28	1	2	4.14182	1.28	1	2	4.24777	1.28	1	2	2.13522	1.28	1	1	0	0	0	0	0	0	0	0	0	0	0	0	0	0	0	0	0
L7M2J9	Putative serine/threonine-protein kinase tricorner OS=Rhipicephalus pulchellus PE=2 SV=1 - [L7M2J9_9ACAR]	489	56.0113	7.95752	2	1	1	7	0	0	0	0	2.58099	3.68	1	1	2.31578	3.68	1	1	6.54115	3.68	1	3	2.23766	3.68	1	1	2.95772	3.68	1	1	0	0	0	0	0	0	0	0	0	0	0	0	0	0	0	0	0
isotig02568|cuticle	isotig02568|cuticle	173	18.2121	6.1001	1	2	4	20	0	0	0	0	0	0	0	0	4.34059	14.45	2	2	3.11891	7.51	1	1	3.49577	7.51	1	1	6.12947	7.51	1	2	9.00078	21.97	3	3	7.06409	7.51	1	2	3.0566	7.51	1	1	9.87646	22.54	3	3	3.79551
A0A147BES9	Putative histone-lysine n-methyltransferase (Fragment) OS=Ixodes ricinus PE=4 SV=1 - [A0A147BES9_IXORI]	489	52.8212	9.67139	2	3	3	12	2.19101	3.07	1	1	2.33998	3.07	1	1	0	0	0	0	2.12228	3.07	1	1	4.42869	6.34	2	2	2.14784	3.07	1	1	4.62881	3.07	1	2	0	0	0	0	8.55027	5.52	2	4	0	0	0	0	0
B7PE49	Salivary protein Is3, putative OS=Ixodes scapularis GN=IscW_ISCW005218 PE=4 SV=1 - [B7PE49_IXOSC]	795	89.2808	6.80029	1	1	1	11	2.16508	1.64	1	1	0	0	0	0	2.26096	1.64	1	1	2.35227	1.64	1	1	2.06698	1.64	1	1	4.46271	1.64	1	2	4.20354	1.64	1	2	4.80383	1.64	1	2	2.10544	1.64	1	1	0	0	0	0	0
A0A0K8R4R0	Putative metalloprotease OS=Ixodes ricinus PE=2 SV=1 - [A0A0K8R4R0_IXORI]	467	52.3654	7.28369	1	1	1	11	0	0	0	0	2.22732	2.78	1	1	2.1808	2.78	1	1	4.37933	2.78	1	2	2.34479	2.78	1	1	2.23579	2.78	1	1	4.66861	2.78	1	2	4.30402	2.78	1	2	0	0	0	0	0	0	0	0	0
A0A131XT09	Proteinral transcription factor iif subunit (Fragment) OS=Ixodes ricinus PE=2 SV=1 - [A0A131XT09_IXORI]	516	58.4977	5.85889	4	1	2	11	0	0	0	0	0	0	0	0	4.39907	2.13	1	2	4.81928	2.13	1	2	4.56076	2.13	1	2	0	0	0	0	2.32325	2.13	1	1	0	0	0	0	7.02117	2.13	1	3	2.03037	1.94	1	1	0
A0A147B8G4	Coatomer subunit beta (Fragment) OS=Carios mimon PE=4 SV=1 - [A0A147B8G4_9ACAR]	205	22.8752	5.5542	1	1	1	15	0	0	0	0	2.50755	5.37	1	1	2.76481	5.37	1	1	5.56283	5.37	1	2	2.95085	5.37	1	1	2.04331	5.37	1	1	6.26631	5.37	1	2	0	0	0	0	2.63935	5.37	1	1	6.27185	5.37	1	2	5.90314
A0A1E1X7V5	Putative rhoa gtpase effector dia/diaphanous (Fragment) OS=Amblyomma aureolatum PE=2 SV=1 - [A0A1E1X7V5_9ACAR]	943	100.521	10.5503	1	2	3	11	4.04392	2.97	2	2	0	0	0	0	0	0	0	0	0	0	0	0	4.19793	1.48	1	2	4.18843	2.97	2	2	2.03326	1.48	1	1	2.22855	1.48	1	1	2.05766	1.48	1	1	0	0	0	0	2.21018
A0A023FYX0	Putative secreted protein 94 OS=Amblyomma parvum PE=2 SV=1 - [A0A023FYX0_9ACAR]	186	20.9429	9.02686	1	1	1	10	2.15734	5.91	1	1	0	0	0	0	2.0883	5.91	1	1	2.10689	5.91	1	1	4.85658	5.91	1	2	2.01731	5.91	1	1	2.07568	5.91	1	1	2.02533	5.91	1	1	2.30837	5.91	1	1	0	0	0	0	2.01493
isotig06006	eukaryotic translation initiation factor 3 subunit	788	86.778	5.96045	2	2	2	10	0	0	0	0	2.2556	1.52	1	1	2.3694	1.52	1	1	2.68704	1.52	1	1	2.72781	1.52	1	1	4.40532	2.92	2	2	2.06109	1.4	1	1	0	0	0	0	2.32496	1.4	1	1	2.02983	1.4	1	1	2.02473
L7LYC0	Uncharacterized protein OS=Rhipicephalus pulchellus PE=2 SV=1 - [L7LYC0_9ACAR]	631	71.3237	9.39307	1	1	1	8	2.52413	2.54	1	1	2.50594	2.54	1	1	0	0	0	0	2.81277	2.54	1	1	5.73473	2.54	1	2	2.36706	2.54	1	1	2.50472	2.54	1	1	0	0	0	0	0	0	0	0	2.38064	2.54	1	1	0
A0A131Z837	Reprolysin OS=Rhipicephalus appendiculatus PE=4 SV=1 - [A0A131Z837_RHIAP]	494	55.5446	6.96143	2	2	2	7	0	0	0	0	2.51314	3.24	1	1	2.13857	3.24	1	1	6.84053	3.24	1	3	2.51558	3.24	1	1	0	0	0	0	2.1158	3.04	1	1	0	0	0	0	0	0	0	0	0	0	0	0	0
L7LU59	Putative secreted mucin muc17 OS=Rhipicephalus pulchellus PE=2 SV=1 - [L7LU59_9ACAR]	6645	693.504	6.81494	3	1	2	7	0	0	0	0	2.09457	0.23	1	1	2.44637	0.26	1	1	4.31639	0.26	1	2	2.09851	0.26	1	1	2.04049	0.23	1	1	0	0	0	0	0	0	0	0	2.19676	0.26	1	1	0	0	0	0	0
A0A131YLK2	Microtubule associated complex OS=Rhipicephalus appendiculatus PE=4 SV=1 - [A0A131YLK2_RHIAP]	4430	495.031	8.83643	1	3	3	6	2.1047	0.32	1	1	0	0	0	0	2.03128	0.36	1	1	4.38214	0.34	1	2	2.44376	0.34	1	1	2.15647	0.32	1	1	0	0	0	0	0	0	0	0	0	0	0	0	0	0	0	0	0
A0A131Z1Z7	Sorting nexin OS=Rhipicephalus appendiculatus PE=3 SV=1 - [A0A131Z1Z7_RHIAP]	411	47.2862	6.68311	2	1	1	6	2.12654	3.65	1	1	2.24829	3.65	1	1	0	0	0	0	0	0	0	0	4.09097	3.65	1	2	4.29797	3.65	1	2	0	0	0	0	0	0	0	0	0	0	0	0	0	0	0	0	0
isotig20996	serine protease 27-like	298	31.2161	8.93896	1	4	4	29	5.2994	6.04	1	1	0	0	0	0	4.44052	6.04	1	1	4.56919	6.04	1	1	5.09962	6.04	1	1	4.94042	6.04	1	1	19.576	14.77	3	5	8.57015	10.07	2	3	12.5958	14.77	3	4	16.9123	18.46	4	5	10.7546
L7LVM9	Putative rab39 OS=Rhipicephalus pulchellus PE=2 SV=1 - [L7LVM9_9ACAR]	256	29.1147	5.09717	80	1	2	12	2.74435	4.3	1	1	0	0	0	0	2.81808	4.3	1	1	2.68569	4.3	1	1	2.491	4.3	1	1	2.19045	4.3	1	1	2.56388	4.3	1	1	4.73585	16.8	2	2	2.60023	4.3	1	1	2.83002	4.3	1	1	2.33071
B7PAY2	IMP-GMP specific 5'-nucleotidase, putative (Fragment) OS=Ixodes scapularis GN=IscW_ISCW002028 PE=4 SV=1 - [B7PAY2_IXOSC]	519	59.8388	5.96045	9	1	3	14	2.19269	1.35	1	1	2.03993	1.35	1	1	0	0	0	0	0	0	0	0	2.05179	1.35	1	1	5.41842	4.05	2	2	2.25127	1.35	1	1	2.14068	1.35	1	1	2.19175	1.35	1	1	4.56808	3.28	2	2	5.02074
V5HWI8	Protein transport OS=Ixodes ricinus PE=2 SV=1 - [V5HWI8_IXORI]	212	23.62	6.07471	76	1	2	13	2.74435	5.19	1	1	0	0	0	0	2.81808	5.19	1	1	2.68569	5.19	1	1	2.491	5.19	1	1	2.19045	5.19	1	1	2.56388	5.19	1	1	2.21627	5.19	1	1	2.60023	5.19	1	1	4.83057	8.96	2	2	4.34226
A0A131Y0U6	Putative spermine/spermidine synthase OS=Ixodes ricinus PE=2 SV=1 - [A0A131Y0U6_IXORI]	675	75.5828	6.55127	3	2	2	11	0	0	0	0	0	0	0	0	4.48293	1.48	1	2	0	0	0	0	4.51729	4.3	2	2	2.28388	1.48	1	1	2.26864	1.48	1	1	2.39521	1.48	1	1	2.30621	1.48	1	1	2.16197	1.48	1	1	2.21403
isotig17971	estradiol 17-beta-dehydrogenase 12-b	341	37.6877	9.1001	7	4	4	11	2.07277	3.23	1	1	0	0	0	0	2.63103	3.23	1	1	5.05695	3.81	1	2	0	0	0	0	2.23748	2.64	1	1	5.35838	7.04	2	2	0	0	0	0	3.18994	3.81	1	1	0	0	0	0	0
V5HG79	Putative short stop (Fragment) OS=Ixodes ricinus PE=2 SV=1 - [V5HG79_IXORI]	5622	634.198	6.50732	2	3	4	8	3.14861	0.25	1	1	0	0	0	0	2.07635	0.28	1	1	2.12719	0.2	1	1	2.7497	0.25	1	1	2.04357	0.28	1	1	5.82977	0.44	2	2	0	0	0	0	2.02564	0.28	1	1	0	0	0	0	0
A0A1E1X474	Putative myosin class ii heavy chain (Fragment) OS=Amblyomma aureolatum PE=2 SV=1 - [A0A1E1X474_9ACAR]	848	95.7341	6.771	1	2	2	13	2.35197	1.65	1	1	2.04978	1.53	1	1	0	0	0	0	0	0	0	0	2.29516	1.53	1	1	4.01674	3.18	2	2	2.03684	1.65	1	1	2.01196	1.53	1	1	0	0	0	0	6.29263	3.18	2	3	4.59489
A0A131YNE3	Guanylate-binding protein OS=Rhipicephalus appendiculatus PE=4 SV=1 - [A0A131YNE3_RHIAP]	455	52.49	7.48877	1	1	1	11	2.44942	1.54	1	1	2.21283	1.54	1	1	0	0	0	0	2.33326	1.54	1	1	2.17722	1.54	1	1	2.28999	1.54	1	1	2.41362	1.54	1	1	0	0	0	0	2.12365	1.54	1	1	2.35383	1.54	1	1	2.22528
V5H607	Putative heat repeat protein (Fragment) OS=Ixodes ricinus PE=2 SV=1 - [V5H607_IXORI]	1031	113.811	6.45557	2	1	1	11	2.05199	1.45	1	1	2.02108	1.45	1	1	0	0	0	0	2.20965	1.45	1	1	2.38262	1.45	1	1	2.11448	1.45	1	1	2.22977	1.45	1	1	0	0	0	0	2.24399	1.45	1	1	2.11534	1.45	1	1	4.69613
A0A023GKA7	Uncharacterized protein (Fragment) OS=Amblyomma triste PE=2 SV=1 - [A0A023GKA7_9ACAR]	458	52.2141	7.89893	5	1	1	10	0	0	0	0	2.14726	2.4	1	1	2.0305	2.4	1	1	2.12368	2.4	1	1	2.09906	2.4	1	1	2.09715	2.4	1	1	0	0	0	0	2.28524	2.4	1	1	2.28081	2.4	1	1	4.23354	2.4	1	2	2.10965
A0A131XG77	Peptide deformylase OS=Hyalomma excavatum PE=2 SV=1 - [A0A131XG77_9ACAR]	217	25.1277	8.39697	2	1	1	8	0	0	0	0	4.24087	4.61	1	2	0	0	0	0	2.42597	4.61	1	1	0	0	0	0	4.37281	4.61	1	2	2.12434	4.61	1	1	2.00601	4.61	1	1	0	0	0	0	0	0	0	0	2.23529
A0A131Z3B9	Pancreatic trypsin inhibitor OS=Rhipicephalus appendiculatus PE=4 SV=1 - [A0A131Z3B9_RHIAP]	204	22.9811	8.68994	2	2	2	7	2.10841	6.86	1	1	0	0	0	0	2.3482	6.86	1	1	0	0	0	0	2.49047	6.86	1	1	4.10982	13.24	2	2	2.00717	6.86	1	1	0	0	0	0	2.19336	6.86	1	1	0	0	0	0	0
M4GZ86	Ribosomal protein L31 (Fragment) OS=Antricola delacruzi PE=2 SV=1 - [M4GZ86_ANTDE]	124	14.498	10.8286	1	1	1	15	7.41337	11.29	1	2	0	0	0	0	0	0	0	0	3.12548	11.29	1	1	2.7735	11.29	1	1	3.24995	11.29	1	1	4.23787	11.29	1	1	0	0	0	0	0	0	0	0	4.36502	11.29	1	1	14.0471
A0A023GL21	Putative vacuolar sorting protein vps1 dynamin (Fragment) OS=Amblyomma triste PE=2 SV=1 - [A0A023GL21_9ACAR]	524	58.4868	8.08936	4	3	3	8	2.09628	2.1	1	1	0	0	0	0	2.00389	2.1	1	1	0	0	0	0	4.30078	2.1	1	2	2.01367	2.1	1	1	0	0	0	0	2.09919	2.1	1	1	0	0	0	0	5.12988	4.01	2	2	0
A0A131Z0R6	Zinc knuckle domain containing protein OS=Rhipicephalus appendiculatus PE=4 SV=1 - [A0A131Z0R6_RHIAP]	209	23.2212	9.64209	1	1	1	7	0	0	0	0	2.12091	6.7	1	1	2.06014	6.7	1	1	4.52179	6.7	1	2	0	0	0	0	2.06107	6.7	1	1	2.0464	6.7	1	1	0	0	0	0	0	0	0	0	0	0	0	0	0
B7PIG7	Polyprotein of retroviral origin, putative (Fragment) OS=Ixodes scapularis GN=IscW_ISCW004760 PE=4 SV=1 - [B7PIG7_IXOSC]	151	17.4422	8.86572	1	2	2	7	4.51749	7.95	1	2	0	0	0	0	0	0	0	0	2.30454	7.95	1	1	2.28695	7.95	1	1	2.17294	7.95	1	1	0	0	0	0	0	0	0	0	2.14001	7.95	1	1	2.0206	10.6	1	1	0
L7LS10	Putative sorting nexin-24 OS=Rhipicephalus pulchellus PE=2 SV=1 - [L7LS10_9ACAR]	199	22.2555	9.40771	7	2	2	7	2.06264	13.07	1	1	2.03541	13.07	1	1	0	0	0	0	0	0	0	0	2.06401	13.07	1	1	4.40563	13.07	1	2	0	0	0	0	2.15603	13.07	1	1	0	0	0	0	0	0	0	0	0
V5HCA4	Putative tick kunitz 70 (Fragment) OS=Ixodes ricinus PE=2 SV=1 - [V5HCA4_IXORI]	89	9.63887	8.1626	2	1	1	6	0	0	0	0	4.22085	16.85	1	2	0	0	0	0	4.32338	16.85	1	2	0	0	0	0	2.2251	16.85	1	1	0	0	0	0	0	0	0	0	2.0388	16.85	1	1	0	0	0	0	0
A0A131XMI2	Putative selenium-binding protein 1 isoform x1 OS=Hyalomma excavatum PE=2 SV=1 - [A0A131XMI2_9ACAR]	500	55.8834	5.99854	1	1	1	5	0	0	0	0	2.14328	3.4	1	1	2.54341	3.4	1	1	5.07884	3.4	1	2	2.21334	3.4	1	1	0	0	0	0	0	0	0	0	0	0	0	0	0	0	0	0	0	0	0	0	0
A0A147BBZ3	Putative transposase-like protein OS=Ixodes ricinus PE=4 SV=1 - [A0A147BBZ3_IXORI]	243	26.1225	9.37842	1	1	1	5	2.12841	6.17	1	1	2.75547	6.17	1	1	0	0	0	0	2.40989	6.17	1	1	4.96476	6.17	1	2	0	0	0	0	0	0	0	0	0	0	0	0	0	0	0	0	0	0	0	0	0
B7PE66	Ribosome biogenesis protein NIP7, putative OS=Ixodes scapularis GN=IscW_ISCW024289 PE=4 SV=1 - [B7PE66_IXOSC]	150	17.3358	8.93896	10	1	1	5	2.04892	10	1	1	0	0	0	0	2.143	10	1	1	4.45968	10	1	2	0	0	0	0	2.38299	10	1	1	0	0	0	0	0	0	0	0	0	0	0	0	0	0	0	0	0
L7LT02	Putative heat shock protein OS=Rhipicephalus pulchellus PE=2 SV=1 - [L7LT02_9ACAR]	468	51.5138	8.74854	1	1	1	5	0	0	0	0	2.02361	2.99	1	1	2.07129	2.99	1	1	2.27625	2.99	1	1	4.24098	2.99	1	2	0	0	0	0	0	0	0	0	0	0	0	0	0	0	0	0	0	0	0	0	0
L7MC33	Putative monolaris OS=Rhipicephalus pulchellus PE=2 SV=1 - [L7MC33_9ACAR]	154	17.8615	8.11865	1	1	2	5	4.07247	18.83	2	2	0	0	0	0	0	0	0	0	2.14761	9.09	1	1	2.44089	9.09	1	1	2.26287	9.09	1	1	0	0	0	0	0	0	0	0	0	0	0	0	0	0	0	0	0
Q6QVL7	NPC1 OS=Ornithodoros moubata PE=2 SV=1 - [Q6QVL7_ORNMO]	228	25.3784	7.47412	1	1	1	5	0	0	0	0	2.24081	5.7	1	2	0	0	0	0	2.05772	5.7	1	2	0	0	0	0	2.00988	5.7	1	1	0	0	0	0	0	0	0	0	0	0	0	0	0	0	0	0	0
V5HWT9	Putative histone-lysine n-methyltransferase (Fragment) OS=Ixodes ricinus PE=2 SV=1 - [V5HWT9_IXORI]	437	49.9062	6.88818	1	1	1	5	2.55091	4.12	1	1	2.51839	4.12	1	1	0	0	0	0	4.73405	4.12	1	2	2.19276	4.12	1	1	0	0	0	0	0	0	0	0	0	0	0	0	0	0	0	0	0	0	0	0	0
M4GZ88	40S ribosomal protein S2-0S (Fragment) OS=Antricola delacruzi PE=2 SV=1 - [M4GZ88_ANTDE]	242	26.6572	9.67139	16	1	2	14	2.3035	4.55	1	1	0	0	0	0	2.22062	4.55	1	1	0	0	0	0	2.21252	4.55	1	1	2.62942	4.55	1	1	2.04575	4.55	1	1	7.73401	4.55	1	3	4.42053	9.09	2	2	4.32878	9.09	2	2	2.61353
A0A023GNQ4	T-complex protein 1 subunit delta OS=Amblyomma triste PE=2 SV=1 - [A0A023GNQ4_9ACAR]	536	57.4245	7.31299	10	1	3	12	2.42486	1.68	1	1	2.37981	1.68	1	1	0	0	0	0	2.32546	1.68	1	1	2.55426	1.68	1	1	0	0	0	0	2.11159	1.49	1	1	2.28016	1.68	1	1	5.00919	3.17	2	2	2.94949	1.68	1	1	2.82574
V5ICG8	Putative 26s proteasome regulatory complex subunit rpn1/psmd2 OS=Ixodes ricinus PE=2 SV=1 - [V5ICG8_IXORI]	505	54.3684	6.13818	13	2	2	13	2.44525	1.78	1	1	2.12234	1.78	1	1	0	0	0	0	2.37414	1.78	1	1	2.6	1.78	1	1	0	0	0	0	2.60935	1.78	1	1	2.52984	1.78	1	1	2.54975	1.78	1	1	6.327	4.75	2	2	5.5968
A0A131XQL9	Putative kolobok-5 tv (Fragment) OS=Ixodes ricinus PE=2 SV=1 - [A0A131XQL9_IXORI]	485	55.3623	9.51025	3	1	2	8	0	0	0	0	2.8888	2.47	1	1	2.69303	2.47	1	1	2.11417	2.47	1	1	0	0	0	0	2.79752	2.47	1	1	4.1729	5.36	2	2	0	0	0	0	2.12921	2.47	1	1	2.34225	2.47	1	1	0
isotig17713	calsequestrin family protein	409	44.5633	6.62451	1	3	3	8	2.63024	2.93	1	1	0	0	0	0	2.24011	2.93	1	1	4.54579	5.62	2	2	0	0	0	0	0	0	0	0	5.66217	6.6	2	2	0	0	0	0	2.31527	2.93	1	1	2.59148	2.93	1	1	0
isotig11310	iron zinc purple acid phosphatase-like	340	39.0936	5.5415	2	4	4	7	0	0	0	0	0	0	0	0	4.22721	6.18	2	2	2.34115	2.94	1	1	0	0	0	0	2.15204	2.65	1	1	6.2286	7.65	2	2	0	0	0	0	2.09471	2.94	1	1	0	0	0	0	0
isotig02240	klingon cg6669-pa	149	16.2973	5.51611	2	1	1	10	2.24087	8.05	1	1	2.98306	8.05	1	1	0	0	0	0	0	0	0	0	0	0	0	0	5.5989	8.05	1	2	2.96852	8.05	1	1	0	0	0	0	3.32624	8.05	1	1	6.50991	8.05	1	2	6.73297
A0A1E1XG19	Putative mitochondrial tryptophanyl-trna synthetase (Fragment) OS=Amblyomma aureolatum PE=2 SV=1 - [A0A1E1XG19_9ACAR]	403	44.8751	8.49951	1	1	1	8	0	0	0	0	4.75919	3.47	1	2	0	0	0	0	2.39881	3.47	1	1	0	0	0	0	2.14087	3.47	1	1	4.14092	3.47	1	2	0	0	0	0	0	0	0	0	0	0	0	0	2.08879
V5H6L5	Putative wd40-repeat-containing subunit of the 18s rrna processing complex OS=Ixodes ricinus PE=2 SV=1 - [V5H6L5_IXORI]	385	43.6207	9.56885	5	1	2	7	0	0	0	0	2.0704	3.64	1	1	2.01832	3.64	1	1	2.07509	3.64	1	1	2.17713	3.64	1	1	0	0	0	0	4.05503	3.64	1	2	0	0	0	0	0	0	0	0	2.05682	3.12	1	1	0
A0A131XLV6	Putative conserved secreted protein (Fragment) OS=Hyalomma excavatum PE=2 SV=1 - [A0A131XLV6_9ACAR]	913	102.253	10.6821	1	1	1	6	2.1508	1.53	1	1	0	0	0	0	2.10681	1.53	1	1	2.04675	1.53	1	1	0	0	0	0	2.32745	1.53	1	1	4.49031	1.53	1	2	0	0	0	0	0	0	0	0	0	0	0	0	0
A0A131XQG2	Uncharacterized protein (Fragment) OS=Ixodes ricinus PE=2 SV=1 - [A0A131XQG2_IXORI]	250	27.3497	9.979	1	1	1	6	2.21363	6	1	1	2.3289	6	1	1	0	0	0	0	0	0	0	0	4.56247	6	1	2	0	0	0	0	4.52237	6	1	2	0	0	0	0	0	0	0	0	0	0	0	0	0
A0A1E1XDR6	DNA-directed RNA polymerase subunit OS=Amblyomma aureolatum PE=2 SV=1 - [A0A1E1XDR6_9ACAR]	1388	154.702	8.22119	6	1	3	6	0	0	0	0	2.00702	1.08	1	1	2.30122	1.08	1	1	2.11422	1.08	1	1	2.27395	1.08	1	1	0	0	0	0	4.66573	2.23	2	2	0	0	0	0	0	0	0	0	0	0	0	0	0
B7PYE5	Centrosome-associated protein CEP250, putative OS=Ixodes scapularis GN=IscW_ISCW009365 PE=4 SV=1 - [B7PYE5_IXOSC]	2713	302.755	4.99561	1	3	4	6	2.02037	0.48	1	1	2.02229	0.48	1	1	0	0	0	0	2.00788	0.7	1	1	2.09359	0.63	1	1	0	0	0	0	4.2146	1.03	2	2	0	0	0	0	0	0	0	0	0	0	0	0	0
A0A023FS78	Uncharacterized protein (Fragment) OS=Amblyomma cajennense PE=2 SV=1 - [A0A023FS78_9ACAR]	421	45.521	4.86865	2	1	2	7	2.12916	3.8	1	1	2.00244	2.38	1	1	0	0	0	0	2.23682	3.8	1	1	2.07758	3.8	1	1	0	0	0	0	2.31283	3.8	1	1	0	0	0	0	0	0	0	0	4.62731	3.8	1	2	0
A0A131YA72	Putative dna repair protein swi5 (Fragment) OS=Ixodes ricinus PE=2 SV=1 - [A0A131YA72_IXORI]	128	14.6657	6.88818	1	1	1	5	0	0	0	0	2.35642	11.72	1	1	2.25712	11.72	1	1	0	0	0	0	4.73619	11.72	1	2	0	0	0	0	2.12646	11.72	1	1	0	0	0	0	0	0	0	0	0	0	0	0	0
A0A1E1XJX1	Putative myosin-11 (Fragment) OS=Amblyomma sculptum PE=2 SV=1 - [A0A1E1XJX1_9ACAR]	1018	115.764	4.84326	1	1	2	5	3.09845	1.67	1	1	2.7754	1.67	1	1	0	0	0	0	4.7336	2.46	2	2	0	0	0	0	0	0	0	0	2.96578	1.67	1	1	0	0	0	0	0	0	0	0	0	0	0	0	0
A0A131XRL6	Putative transcription factor capicua (Fragment) OS=Ixodes ricinus PE=2 SV=1 - [A0A131XRL6_IXORI]	1780	192.524	8.70459	1	2	2	6	2.03106	0.84	1	1	2.48896	0.84	1	1	0	0	0	0	0	0	0	0	2.12094	0.79	1	1	2.06106	0.84	1	1	0	0	0	0	0	0	0	0	0	0	0	0	4.40951	0.84	1	2	0
A0A131YHX4	DNA-dependent protein kinase catalytic subunit OS=Rhipicephalus appendiculatus PE=3 SV=1 - [A0A131YHX4_RHIAP]	2423	272.989	7.29834	1	1	2	5	0	0	0	0	2.02323	0.62	1	1	2.15576	0.62	1	1	4.35871	1.03	2	2	0	0	0	0	0	0	0	0	0	0	0	0	0	0	0	0	0	0	0	0	2.25088	0.62	1	1	0
A0A1E1XNU9	Putative tick transposon (Fragment) OS=Amblyomma sculptum PE=2 SV=1 - [A0A1E1XNU9_9ACAR]	1232	139.316	9.51025	1	1	2	5	0	0	0	0	4.1311	1.95	2	2	0	0	0	0	2.07316	0.65	1	1	2.26924	0.65	1	1	0	0	0	0	0	0	0	0	0	0	0	0	0	0	0	0	2.04519	1.3	1	1	0
B7Q5T8	Coagulation factor, putative OS=Ixodes scapularis GN=IscW_ISCW011174 PE=3 SV=1 - [B7Q5T8_IXOSC]	441	49.0587	9.14404	1	1	2	5	4.19078	5.44	2	2	0	0	0	0	0	0	0	0	0	0	0	0	2.14671	2.49	1	1	2.20982	2.49	1	1	0	0	0	0	0	0	0	0	0	0	0	0	0	0	0	0	2.16645
L7LWM9	Putative karyopherin importin beta 3 OS=Rhipicephalus pulchellus PE=2 SV=1 - [L7LWM9_9ACAR]	1096	122.508	4.86865	6	1	4	5	0	0	0	0	2.5184	1	1	1	2.57812	1	1	1	0	0	0	0	4.64592	3.01	2	2	0	0	0	0	0	0	0	0	0	0	0	0	0	0	0	0	0	0	0	0	2.00724
A0A023GAK5	Putative secreted protein OS=Amblyomma triste PE=2 SV=1 - [A0A023GAK5_9ACAR]	199	22.4202	9.37842	3	1	1	4	0	0	0	0	2.07119	8.54	1	2	0	0	0	0	0	0	0	0	0	0	0	0	2.11613	8.54	1	2	0	0	0	0	0	0	0	0	0	0	0	0	0	0	0	0	0
A0A131YWD5	CD109 antigen (Gov platelet alloantigens) OS=Rhipicephalus appendiculatus PE=4 SV=1 - [A0A131YWD5_RHIAP]	1711	189.817	7.00537	1	1	1	4	0	0	0	0	0	0	0	0	4.88658	0.99	1	2	0	0	0	0	2.09154	0.99	1	1	2.23559	0.99	1	1	0	0	0	0	0	0	0	0	0	0	0	0	0	0	0	0	0
A0A1E1X6Z8	Putative tnf receptor-associated factor 5 (Fragment) OS=Amblyomma aureolatum PE=2 SV=1 - [A0A1E1X6Z8_9ACAR]	395	44.1049	7.94287	1	1	1	4	2.1167	3.04	1	1	0	0	0	0	2.1448	3.04	1	1	4.12536	3.04	1	2	0	0	0	0	0	0	0	0	0	0	0	0	0	0	0	0	0	0	0	0	0	0	0	0	0
A0A1E1X9E6	Putative scavenger receptor class a-like c-type lectin OS=Amblyomma aureolatum PE=2 SV=1 - [A0A1E1X9E6_9ACAR]	2407	271.868	6.37939	1	1	3	4	0	0	0	0	4.13182	0.42	1	2	0	0	0	0	4.04623	0.83	2	2	0	0	0	0	0	0	0	0	0	0	0	0	0	0	0	0	0	0	0	0	0	0	0	0	0
A0A1E1XAA1	Putative structure-specific endonuclease subunit slx4 OS=Amblyomma aureolatum PE=2 SV=1 - [A0A1E1XAA1_9ACAR]	1085	120.713	5.52881	1	1	1	4	0	0	0	0	0	0	0	0	4.53338	1.38	1	2	0	0	0	0	2.70644	1.38	1	1	2.77276	1.38	1	1	0	0	0	0	0	0	0	0	0	0	0	0	0	0	0	0	0
A0A1E1XB09	Putative microtubule-associated tumor suppressor candidate 2 (Fragment) OS=Amblyomma aureolatum PE=2 SV=1 - [A0A1E1XB09_9ACAR]	1443	157.795	5.49072	1	1	1	4	2.03095	1.18	1	1	0	0	0	0	2.08558	1.18	1	1	0	0	0	0	4.70973	1.18	1	2	0	0	0	0	0	0	0	0	0	0	0	0	0	0	0	0	0	0	0	0	0
A0A1E1XJA4	Putative pdz domain-containing protein OS=Amblyomma sculptum PE=2 SV=1 - [A0A1E1XJA4_9ACAR]	1563	168.884	7.91357	4	2	2	4	0	0	0	0	0	0	0	0	4.1589	0.9	1	2	2.13425	0.9	1	1	0	0	0	0	2.36102	1.22	1	1	0	0	0	0	0	0	0	0	0	0	0	0	0	0	0	0	0
A0A1L7B9P0	Cytochrome b (Fragment) OS=Kampimodromus aberrans GN=Cytb PE=4 SV=1 - [A0A1L7B9P0_9ACAR]	83	9.83597	8.23584	1	1	1	4	4.18237	15.66	1	2	0	0	0	0	0	0	0	0	2.13122	15.66	1	1	2.30273	15.66	1	1	0	0	0	0	0	0	0	0	0	0	0	0	0	0	0	0	0	0	0	0	0
B7QC90	Chitinase, putative OS=Ixodes scapularis GN=IscW_ISCW013004 PE=4 SV=1 - [B7QC90_IXOSC]	391	43.3275	9.49561	1	1	1	4	4.67894	2.3	1	2	0	0	0	0	0	0	0	0	0	0	0	0	0	0	0	0	4.2707	2.3	1	2	0	0	0	0	0	0	0	0	0	0	0	0	0	0	0	0	0
B7QNR7	Integrator complex subunit, putative OS=Ixodes scapularis GN=IscW_ISCW015463 PE=4 SV=1 - [B7QNR7_IXOSC]	962	106.984	6.65381	3	2	2	4	4.17961	1.56	1	2	0	0	0	0	0	0	0	0	2.28456	1.35	1	1	2.03325	1.56	1	1	0	0	0	0	0	0	0	0	0	0	0	0	0	0	0	0	0	0	0	0	0
L7LQL2	Putative tick salivary metalloprotease OS=Rhipicephalus pulchellus PE=2 SV=1 - [L7LQL2_9ACAR]	507	58.1368	7.15186	1	1	2	4	2.28032	2.17	1	1	0	0	0	0	2.17165	2.17	1	1	4.43337	4.34	2	2	0	0	0	0	0	0	0	0	0	0	0	0	0	0	0	0	0	0	0	0	0	0	0	0	0
L7M6K0	ATP-dependent DNA helicase II subunit 2 OS=Rhipicephalus pulchellus PE=2 SV=1 - [L7M6K0_9ACAR]	687	76.3915	5.2749	2	1	2	4	0	0	0	0	2.32319	2.18	1	1	2.04684	2.18	1	1	4.77699	1.6	1	2	0	0	0	0	0	0	0	0	0	0	0	0	0	0	0	0	0	0	0	0	0	0	0	0	0
L7MD42	Putative kinesin-like protein (Fragment) OS=Rhipicephalus pulchellus PE=2 SV=1 - [L7MD42_9ACAR]	1722	194.202	5.63037	4	1	2	4	2.10721	0.81	1	1	2.1217	0.81	1	1	0	0	0	0	0	0	0	0	0	0	0	0	4.49662	1.57	2	2	0	0	0	0	0	0	0	0	0	0	0	0	0	0	0	0	0
V5HJG3	Uncharacterized protein (Fragment) OS=Ixodes ricinus PE=2 SV=1 - [V5HJG3_IXORI]	401	44.6847	4.70361	2	1	1	4	2.50901	2.99	1	1	2.53608	2.99	1	1	0	0	0	0	5.72968	2.99	1	2	0	0	0	0	0	0	0	0	0	0	0	0	0	0	0	0	0	0	0	0	0	0	0	0	0
V5IJH4	Putative nucleosome-binding factor spn pob3 subunit OS=Ixodes ricinus PE=2 SV=1 - [V5IJH4_IXORI]	402	44.0839	7.06396	3	2	2	4	0	0	0	0	4.0716	5.72	2	2	0	0	0	0	2.13221	2.74	1	2	0	0	0	0	0	0	0	0	0	0	0	0	0	0	0	0	0	0	0	0	0	0	0	0	0
A0A023GLX2	Aconitate hydratase, mitochondrial OS=Amblyomma triste PE=2 SV=1 - [A0A023GLX2_9ACAR]	782	84.9883	7.50342	14	3	3	10	2.02477	1.28	1	1	0	0	0	0	2.63098	1.28	1	1	0	0	0	0	0	0	0	0	2.1442	1.28	1	1	2.19087	1.28	1	1	2.02376	1.28	1	1	2.1013	1.28	1	1	0	0	0	0	6.26433
A0A147BPT6	Putative snf2 family dna-dependent atpase domain-containing protein (Fragment) OS=Ixodes ricinus PE=4 SV=1 - [A0A147BPT6_IXORI]	1402	154.302	6.55127	1	1	1	7	2.51467	0.93	1	1	0	0	0	0	2.26324	0.93	1	1	0	0	0	0	0	0	0	0	2.20825	0.93	1	1	2.18107	0.93	1	1	0	0	0	0	4.19622	0.93	1	2	0	0	0	0	2.16975
A0A023FMI0	Putative acetyl-coa hydrolase OS=Amblyomma cajennense PE=2 SV=1 - [A0A023FMI0_9ACAR]	474	51.4292	8.07471	5	1	2	6	3.13368	2.74	1	1	0	0	0	0	2.01688	3.8	1	1	0	0	0	0	0	0	0	0	3.43403	2.74	1	1	6.48237	6.54	2	2	0	0	0	0	2.66617	2.74	1	1	0	0	0	0	0
isotig11185	transport protein sec61 alpha subunit	476	52.0634	8.23584	10	2	2	6	4.17467	4.2	2	2	0	0	0	0	0	0	0	0	0	0	0	0	2.16481	2.31	1	1	0	0	0	0	0	0	0	0	2.01637	1.89	1	1	4.41432	4.2	2	2	0	0	0	0	0
L7ML82	DNA-directed RNA polymerase subunit (Fragment) OS=Rhipicephalus pulchellus PE=2 SV=1 - [L7ML82_9ACAR]	1429	159.427	8.36768	6	1	3	6	0	0	0	0	2.00702	1.05	1	1	2.30122	1.05	1	1	0	0	0	0	2.27395	1.05	1	1	0	0	0	0	6.98069	3.08	3	3	0	0	0	0	0	0	0	0	0	0	0	0	0
A0A0K8RBE3	Putative vesicle coat complex copii gtpase subunit sar1 OS=Ixodes ricinus PE=2 SV=1 - [A0A0K8RBE3_IXORI]	165	18.8417	7.10791	18	2	2	9	0	0	0	0	2.68209	6.67	1	1	2.17522	6.67	1	1	2.12998	6.67	1	1	0	0	0	0	0	0	0	0	2.4002	6.67	1	1	0	0	0	0	2.18635	6.67	1	1	2.8775	6.67	1	1	2.72505
A0A023GK20	Putative histidyl-trna synthetase (Fragment) OS=Amblyomma triste PE=2 SV=1 - [A0A023GK20_9ACAR]	425	47.8336	5.89697	13	1	3	7	0	0	0	0	2.5721	2.12	1	1	2.71949	2.12	1	1	2.03323	3.06	1	1	0	0	0	0	0	0	0	0	6.39776	5.88	2	2	0	0	0	0	0	0	0	0	2.17587	2.12	1	1	0
A0A1E1XEW7	Putative plus-end-directed vesicle transport along microtubule (Fragment) OS=Amblyomma aureolatum PE=2 SV=1 - [A0A1E1XEW7_9ACAR]	1579	178.021	5.32568	1	2	4	7	4.11072	1.52	2	2	0	0	0	0	0	0	0	0	0	0	0	0	2.06946	0.82	1	1	0	0	0	0	2.14251	0.82	1	1	2.0496	0.76	1	1	0	0	0	0	0	0	0	0	4.22178
A0A131XLF2	Putative alpha-macroglobulin (Fragment) OS=Hyalomma excavatum PE=2 SV=1 - [A0A131XLF2_9ACAR]	1162	131.912	6.22705	2	1	1	5	0	0	0	0	2.25779	1.29	1	1	2.4201	1.29	1	1	0	0	0	0	2.10399	1.29	1	1	0	0	0	0	4.93815	1.29	1	2	0	0	0	0	0	0	0	0	0	0	0	0	0
A0A1E1XAD1	Putative multidomain protein (Fragment) OS=Amblyomma aureolatum PE=2 SV=1 - [A0A1E1XAD1_9ACAR]	1279	145.029	6.45557	2	1	2	5	0	0	0	0	2.51623	1.02	1	1	2.81213	1.02	1	1	0	0	0	0	2.89638	1.02	1	1	0	0	0	0	0	0	0	0	0	0	0	0	4.90604	2.11	2	2	0	0	0	0	0
A0A131XN92	Putative 5' nucleotidase (Fragment) OS=Hyalomma excavatum PE=2 SV=1 - [A0A131XN92_9ACAR]	446	49.6694	7.18115	2	1	2	6	2.09429	2.69	1	1	2.00751	2.69	1	1	0	0	0	0	0	0	0	0	0	0	0	0	2.06984	2.02	1	1	0	0	0	0	2.14968	2.69	1	1	0	0	0	0	4.02847	4.71	2	2	0
V5H6F5	Proteinral transcription factor 3c polypeptide 3 OS=Ixodes ricinus PE=2 SV=1 - [V5H6F5_IXORI]	399	44.9148	7.63525	3	1	1	6	0	0	0	0	2.63752	4.01	1	1	2.22055	4.01	1	1	2.05828	4.01	1	1	0	0	0	0	0	0	0	0	0	0	0	0	0	0	0	0	2.12835	4.01	1	1	0	0	0	0	4.82282
A0A023FGQ8	Innexin OS=Amblyomma cajennense GN=inx PE=2 SV=1 - [A0A023FGQ8_9ACAR]	369	42.7522	8.5874	1	1	2	4	0	0	0	0	4.97118	8.4	2	2	0	0	0	0	0	0	0	0	2.47724	4.07	1	1	0	0	0	0	2.07866	4.07	1	1	0	0	0	0	0	0	0	0	0	0	0	0	0
A0A131YM21	Ribosome biogenesis protein BMS1 OS=Rhipicephalus appendiculatus PE=4 SV=1 - [A0A131YM21_RHIAP]	1120	128.732	8.17725	4	2	3	4	4.60007	1.96	2	2	0	0	0	0	0	0	0	0	2.44746	0.98	1	1	0	0	0	0	0	0	0	0	2.18602	1.07	1	1	0	0	0	0	0	0	0	0	0	0	0	0	0
A0A147BBV6	Putative transposase (Fragment) OS=Ixodes ricinus PE=4 SV=1 - [A0A147BBV6_IXORI]	345	38.8658	8.42627	2	1	2	7	2.22203	2.03	1	1	2.05479	2.03	1	1	0	0	0	0	2.14453	2.03	1	1	0	0	0	0	0	0	0	0	0	0	0	0	0	0	0	0	0	0	0	0	4.20514	5.8	2	2	2.06188
L7LT66	Putative tick transposon OS=Rhipicephalus pulchellus PE=2 SV=1 - [L7LT66_9ACAR]	322	35.1253	9.92041	1	1	1	7	2.1076	3.73	1	1	2.35197	3.73	1	1	0	0	0	0	0	0	0	0	0	0	0	0	2.0787	3.73	1	1	0	0	0	0	0	0	0	0	0	0	0	0	4.37859	3.73	1	2	4.29807
G9NSEKQ02IZRKN	glycine dehydrogenase	82	9.36278	7.18115	1	2	2	6	2.38536	15.85	1	1	2.00981	9.76	1	1	0	0	0	0	0	0	0	0	0	0	0	0	2.32037	15.85	1	1	0	0	0	0	0	0	0	0	0	0	0	0	2.2848	15.85	1	1	5.66155
A0A023GDC0	Putative exosome 3'-5' exoribonuclease complex subunit pm/scl-100 rrp6 (Fragment) OS=Amblyomma triste PE=2 SV=1 - [A0A023GDC0_9ACAR]	856	96.0311	5.92236	1	1	2	5	2.3831	1.75	1	1	0	0	0	0	2.00635	1.75	1	1	0	0	0	0	0	0	0	0	2.5061	1.75	1	1	0	0	0	0	0	0	0	0	0	0	0	0	4.36731	3.15	2	2	0
A0A147BMW2	Putative academ-2 adi (Fragment) OS=Ixodes ricinus PE=4 SV=1 - [A0A147BMW2_IXORI]	865	95.6292	8.60205	2	4	5	5	2.19509	1.5	1	1	0	0	0	0	2.04991	1.5	1	1	0	0	0	0	2.19551	1.85	1	1	0	0	0	0	0	0	0	0	0	0	0	0	0	0	0	0	4.22663	2.54	2	2	0
A0A1E1XFA6	Putative ca2+-binding actin-bundling protein (Fragment) OS=Amblyomma aureolatum PE=2 SV=1 - [A0A1E1XFA6_9ACAR]	4834	554.516	6.44287	8	3	4	5	0	0	0	0	2.08985	0.31	1	1	2.13021	0.25	1	1	2.33661	0.29	1	1	0	0	0	0	0	0	0	0	0	0	0	0	0	0	0	0	0	0	0	0	0	0	0	0	0
L7MGA7	Putative atp-dependent zinc metalloprotease yme1 (Fragment) OS=Rhipicephalus pulchellus PE=2 SV=1 - [L7MGA7_9ACAR]	683	75.9472	8.26514	13	2	3	5	0	0	0	0	4.23518	3.37	2	2	0	0	0	0	0	0	0	0	0	0	0	0	2.2372	2.49	1	1	0	0	0	0	0	0	0	0	0	0	0	0	2.00831	1.9	1	1	0
B7QL09	Putative uncharacterized protein OS=Ixodes scapularis GN=IscW_ISCW013632 PE=4 SV=1 - [B7QL09_IXOSC]	426	46.6939	6.84424	1	2	2	4	0	0	0	0	4.36494	3.52	1	2	0	0	0	0	0	0	0	0	2.23886	3.52	1	1	0	0	0	0	0	0	0	0	0	0	0	0	0	0	0	0	2.10499	2.82	1	1	0
A0A023GGB1	Putative cell cycle control protein crooked neck OS=Amblyomma triste PE=2 SV=1 - [A0A023GGB1_9ACAR]	693	83.0065	6.97607	8	2	3	3	0	0	0	0	4.07174	3.61	2	2	0	0	0	0	2.08581	1.73	1	1	0	0	0	0	0	0	0	0	0	0	0	0	0	0	0	0	0	0	0	0	0	0	0	0	0
A0A023GKJ3	Putative pyridine nucleotide-disulfide oxidoreductase (Fragment) OS=Amblyomma triste PE=2 SV=1 - [A0A023GKJ3_9ACAR]	308	33.6531	6.66846	2	1	1	3	0	0	0	0	0	0	0	0	2.10281	4.87	1	2	2.03111	4.87	1	1	0	0	0	0	0	0	0	0	0	0	0	0	0	0	0	0	0	0	0	0	0	0	0	0	0
A0A0C9SEX1	Putative secreted protein OS=Amblyomma americanum PE=2 SV=1 - [A0A0C9SEX1_AMBAM]	129	14.3088	8.19189	1	2	2	3	4.23991	10.85	1	2	0	0	0	0	0	0	0	0	0	0	0	0	2.00017	13.18	1	1	0	0	0	0	0	0	0	0	0	0	0	0	0	0	0	0	0	0	0	0	0
A0A1E1WX22	Putative serine proteinase inhibitor (Fragment) OS=Amblyomma aureolatum PE=2 SV=1 - [A0A1E1WX22_9ACAR]	130	15.0967	8.01611	1	1	1	3	4.69065	10	1	2	0	0	0	0	0	0	0	0	2.20788	10	1	1	0	0	0	0	0	0	0	0	0	0	0	0	0	0	0	0	0	0	0	0	0	0	0	0	0
A0A1E1X9V7	Lon protease homolog (Fragment) OS=Amblyomma aureolatum PE=2 SV=1 - [A0A1E1X9V7_9ACAR]	993	111.08	7.26904	1	1	2	3	4.27696	1.21	1	2	0	0	0	0	0	0	0	0	0	0	0	0	0	0	0	0	2.31188	1.81	1	1	0	0	0	0	0	0	0	0	0	0	0	0	0	0	0	0	0
B7Q5C5	Dual oxidase maturation factor, putative OS=Ixodes scapularis GN=IscW_ISCW021838 PE=4 SV=1 - [B7Q5C5_IXOSC]	2686	292.341	6.37939	8	1	2	3	0	0	0	0	0	0	0	0	4.57368	0.97	2	2	2.10915	0.6	1	1	0	0	0	0	0	0	0	0	0	0	0	0	0	0	0	0	0	0	0	0	0	0	0	0	0
A0A131XI90	Putative adenylate cyclase terminal-differentiation specific OS=Hyalomma excavatum PE=2 SV=1 - [A0A131XI90_9ACAR]	564	64.8062	7.45947	1	1	1	7	0	0	0	0	2.29418	2.13	1	1	2.15083	2.13	1	1	0	0	0	0	0	0	0	0	0	0	0	0	2.29468	2.13	1	1	7.24443	2.13	1	3	2.15021	2.13	1	1	0	0	0	0	0
A0A1E1X8B3	Putative atp synthase b chain OS=Amblyomma aureolatum PE=2 SV=1 - [A0A1E1X8B3_9ACAR]	266	30.3551	9.26123	1	2	3	7	2.21357	6.02	1	1	0	0	0	0	2.02873	4.14	1	1	0	0	0	0	0	0	0	0	0	0	0	0	0	0	0	0	9.93697	4.51	1	4	0	0	0	0	0	0	0	0	2.21296
B7PJW3	G-protein coupled receptor, putative OS=Ixodes scapularis GN=IscW_ISCW005195 PE=3 SV=1 - [B7PJW3_IXOSC]	373	41.5027	8.17725	1	1	1	6	0	0	0	0	2.04061	2.95	1	1	2.00468	2.95	1	1	0	0	0	0	0	0	0	0	0	0	0	0	4.10309	2.95	1	2	0	0	0	0	0	0	0	0	0	0	0	0	2.05445
V5GTB4	Uncharacterized protein (Fragment) OS=Ixodes ricinus PE=2 SV=1 - [V5GTB4_IXORI]	111	11.883	9.90576	1	1	1	6	2.01372	7.21	1	1	2.02399	7.21	1	1	0	0	0	0	0	0	0	0	0	0	0	0	0	0	0	0	4.02635	7.21	1	2	0	0	0	0	0	0	0	0	2.27374	7.21	1	1	2.09912
A0A131XM51	Putative microtubule-associated protein futsch (Fragment) OS=Hyalomma excavatum PE=2 SV=1 - [A0A131XM51_9ACAR]	3870	420.31	4.71631	1	3	4	5	0	0	0	0	4.17847	0.7	2	2	0	0	0	0	0	0	0	0	0	0	0	0	0	0	0	0	2.16334	0.34	1	1	2.0241	0.31	1	1	0	0	0	0	0	0	0	0	0
A0A090XE41	Putative tbp-1 (Fragment) OS=Ixodes ricinus PE=2 SV=1 - [A0A090XE41_IXORI]	195	22.4651	9.90576	4	1	1	4	2.07554	8.72	1	1	0	0	0	0	2.4057	8.72	1	1	0	0	0	0	0	0	0	0	0	0	0	0	4.5684	8.72	1	2	0	0	0	0	0	0	0	0	0	0	0	0	0
B7QDJ6	Receptor protein-tyrosine phosphatase 10D, putative (Fragment) OS=Ixodes scapularis GN=IscW_ISCW022067 PE=4 SV=1 - [B7QDJ6_IXOSC]	1439	162.664	6.56592	2	1	1	4	0	0	0	0	0	0	0	0	4.0547	0.76	1	2	0	0	0	0	0	0	0	0	0	0	0	0	4.60617	0.76	1	2	0	0	0	0	0	0	0	0	0	0	0	0	0
A0A1E1X849	Putative beta-spectrin (Fragment) OS=Amblyomma aureolatum PE=2 SV=1 - [A0A1E1X849_9ACAR]	2603	297.518	5.45264	2	2	4	5	0	0	0	0	4.33196	1.11	2	2	0	0	0	0	0	0	0	0	0	0	0	0	0	0	0	0	0	0	0	0	0	0	0	0	2.17925	0.38	1	1	4.30155	0.96	2	2	0
L7MMQ8	Putative translocase of outer membrane 34 (Fragment) OS=Rhipicephalus pulchellus PE=2 SV=1 - [L7MMQ8_9ACAR]	921	101.271	6.02393	4	1	3	5	0	0	0	0	2.24958	1.41	1	1	2.08317	1.09	1	1	0	0	0	0	0	0	0	0	0	0	0	0	2.16311	1.09	1	1	0	0	0	0	0	0	0	0	0	0	0	0	0
A0A131YKS4	Histone deacetylase OS=Rhipicephalus appendiculatus PE=3 SV=1 - [A0A131YKS4_RHIAP]	525	58.5323	6.06201	21	3	3	3	0	0	0	0	0	0	0	0	4.43868	4.76	2	2	0	0	0	0	0	0	0	0	0	0	0	0	2.59729	2.29	1	1	0	0	0	0	0	0	0	0	0	0	0	0	0
A0A1E1XK53	Putative chromatin remodeling complex wstf-iswi (Fragment) OS=Amblyomma sculptum PE=2 SV=1 - [A0A1E1XK53_9ACAR]	1116	119.376	4.84326	3	2	2	3	4.28855	1.43	1	2	0	0	0	0	0	0	0	0	0	0	0	0	0	0	0	0	0	0	0	0	0	0	0	0	0	0	0	0	2.20842	1.08	1	1	0	0	0	0	0
A0A131XEC6	Putative microtubule-associated protein futsch (Fragment) OS=Hyalomma excavatum PE=2 SV=1 - [A0A131XEC6_9ACAR]	1483	158.561	9.92041	4	1	2	3	0	0	0	0	0	0	0	0	4.39016	0.88	1	2	0	0	0	0	0	0	0	0	0	0	0	0	0	0	0	0	0	0	0	0	0	0	0	0	2.05943	1.01	1	1	0
A0A131Z270	Small subunit ribosomal protein S5 OS=Rhipicephalus appendiculatus PE=3 SV=1 - [A0A131Z270_RHIAP]	439	49.5461	9.92041	4	3	3	3	4.13676	4.78	2	2	0	0	0	0	0	0	0	0	0	0	0	0	0	0	0	0	0	0	0	0	0	0	0	0	0	0	0	0	0	0	0	0	0	0	0	0	0
A0A1E1XQN7	Putative a-kinase anchor protein 17a (Fragment) OS=Amblyomma sculptum PE=2 SV=1 - [A0A1E1XQN7_9ACAR]	420	52.9724	8.89502	2	3	3	3	0	0	0	0	4.5046	3.57	2	2	0	0	0	0	0	0	0	0	0	0	0	0	0	0	0	0	0	0	0	0	0	0	0	0	0	0	0	0	0	0	0	0	0
B7P8P2	Nbeal1, putative OS=Ixodes scapularis GN=IscW_ISCW016654 PE=4 SV=1 - [B7P8P2_IXOSC]	1960	216.596	6.52197	2	3	3	3	4.61656	1.28	2	2	0	0	0	0	0	0	0	0	0	0	0	0	0	0	0	0	0	0	0	0	0	0	0	0	0	0	0	0	0	0	0	0	2.54194	0.82	1	1	0
B7QAB3	Endo beta N-acetylglucosaminidase, putative (Fragment) OS=Ixodes scapularis GN=IscW_ISCW021922 PE=4 SV=1 - [B7QAB3_IXOSC]	291	32.7515	5.77002	2	1	1	3	2.17295	5.15	1	2	0	0	0	0	0	0	0	0	0	0	0	0	0	0	0	0	0	0	0	0	0	0	0	0	0	0	0	0	0	0	0	0	0	0	0	0	2.02593
A0A090X9A3	Putative i-10 dbi OS=Ixodes ricinus PE=2 SV=1 - [A0A090X9A3_IXORI]	345	39.2163	8.76318	1	1	1	2	0	0	0	0	4.67126	4.93	1	2	0	0	0	0	0	0	0	0	0	0	0	0	0	0	0	0	0	0	0	0	0	0	0	0	0	0	0	0	0	0	0	0	0
A0A0C9RSS7	Uncharacterized protein (Fragment) OS=Amblyomma americanum PE=2 SV=1 - [A0A0C9RSS7_AMBAM]	158	17.5	5.85889	1	1	1	2	4.13734	10.13	1	2	0	0	0	0	0	0	0	0	0	0	0	0	0	0	0	0	0	0	0	0	0	0	0	0	0	0	0	0	0	0	0	0	0	0	0	0	0
A0A0K8RAH2	Putative basic tail protein OS=Ixodes ricinus PE=2 SV=1 - [A0A0K8RAH2_IXORI]	181	20.1291	5.12256	1	1	1	2	0	0	0	0	2.19127	8.84	1	2	0	0	0	0	0	0	0	0	0	0	0	0	0	0	0	0	0	0	0	0	0	0	0	0	0	0	0	0	0	0	0	0	0
A0A131XAR9	Putative microtubule-associated protein futsch futsch (Fragment) OS=Hyalomma excavatum PE=2 SV=1 - [A0A131XAR9_9ACAR]	1797	196.894	8.41162	1	1	1	2	4.11889	0.72	1	2	0	0	0	0	0	0	0	0	0	0	0	0	0	0	0	0	0	0	0	0	0	0	0	0	0	0	0	0	0	0	0	0	0	0	0	0	0
A0A131XFV8	Putative myosin class ii heavy chain (Fragment) OS=Hyalomma excavatum PE=2 SV=1 - [A0A131XFV8_9ACAR]	841	95.0868	4.91943	1	1	2	2	4.13209	2.85	2	2	0	0	0	0	0	0	0	0	0	0	0	0	0	0	0	0	0	0	0	0	0	0	0	0	0	0	0	0	0	0	0	0	0	0	0	0	0
A0A131XLA5	Putative structure-specific endonuclease subunit slx4 OS=Hyalomma excavatum PE=2 SV=1 - [A0A131XLA5_9ACAR]	1090	121.871	5.35107	1	2	2	2	4.09816	2.39	2	2	0	0	0	0	0	0	0	0	0	0	0	0	0	0	0	0	0	0	0	0	0	0	0	0	0	0	0	0	0	0	0	0	0	0	0	0	0
A0A131XNR1	Putative dnaj-class molecular chaperone (Fragment) OS=Hyalomma excavatum PE=2 SV=1 - [A0A131XNR1_9ACAR]	457	52.385	7.29834	1	1	1	2	4.33377	2.19	1	2	0	0	0	0	0	0	0	0	0	0	0	0	0	0	0	0	0	0	0	0	0	0	0	0	0	0	0	0	0	0	0	0	0	0	0	0	0
A0A131Y3Q4	Putative focal adhesion protein pinch-1 OS=Ixodes ricinus PE=2 SV=1 - [A0A131Y3Q4_IXORI]	320	37.0176	8.36768	2	1	1	2	0	0	0	0	2.14026	4.38	1	2	0	0	0	0	0	0	0	0	0	0	0	0	0	0	0	0	0	0	0	0	0	0	0	0	0	0	0	0	0	0	0	0	0
A0A131Y7H6	Putative receptor-mediated endocytosis (Fragment) OS=Ixodes ricinus PE=2 SV=1 - [A0A131Y7H6_IXORI]	277	31.8593	10.2427	2	2	2	2	4.2831	7.94	2	2	0	0	0	0	0	0	0	0	0	0	0	0	0	0	0	0	0	0	0	0	0	0	0	0	0	0	0	0	0	0	0	0	0	0	0	0	0
A0A131YBA8	Putative alcohol dehydrogenase transcription factor myb/sant-like protein (Fragment) OS=Ixodes ricinus PE=2 SV=1 - [A0A131YBA8_IXORI]	271	31.0936	7.59131	3	1	1	2	0	0	0	0	2.17452	5.54	1	2	0	0	0	0	0	0	0	0	0	0	0	0	0	0	0	0	0	0	0	0	0	0	0	0	0	0	0	0	0	0	0	0	0
A0A131YL38	N-acetylneuraminate lyase OS=Rhipicephalus appendiculatus PE=3 SV=1 - [A0A131YL38_RHIAP]	308	33.6565	6.44287	1	1	1	2	0	0	0	0	4.31087	4.22	1	2	0	0	0	0	0	0	0	0	0	0	0	0	0	0	0	0	0	0	0	0	0	0	0	0	0	0	0	0	0	0	0	0	0
A0A131YLJ6	ERO1-like protein alpha OS=Rhipicephalus appendiculatus PE=4 SV=1 - [A0A131YLJ6_RHIAP]	448	50.9919	6.7417	2	1	1	2	0	0	0	0	0	0	0	0	2.52822	3.79	1	2	0	0	0	0	0	0	0	0	0	0	0	0	0	0	0	0	0	0	0	0	0	0	0	0	0	0	0	0	0
A0A131Z5J4	Transmembrane protease serine 9-like protein OS=Rhipicephalus appendiculatus PE=4 SV=1 - [A0A131Z5J4_RHIAP]	310	35.2734	9.65674	1	1	1	2	0	0	0	0	2.21835	4.84	1	2	0	0	0	0	0	0	0	0	0	0	0	0	0	0	0	0	0	0	0	0	0	0	0	0	0	0	0	0	0	0	0	0	0
A0A131Z694	Evasin OS=Rhipicephalus appendiculatus PE=4 SV=1 - [A0A131Z694_RHIAP]	129	14.6277	4.97021	1	1	1	2	0	0	0	0	0	0	0	0	4.39281	11.63	1	2	0	0	0	0	0	0	0	0	0	0	0	0	0	0	0	0	0	0	0	0	0	0	0	0	0	0	0	0	0
A0A147BCV8	Uncharacterized protein OS=Ixodes ricinus PE=4 SV=1 - [A0A147BCV8_IXORI]	660	74.7092	8.23584	1	1	1	2	0	0	0	0	0	0	0	0	4.18992	1.82	1	2	0	0	0	0	0	0	0	0	0	0	0	0	0	0	0	0	0	0	0	0	0	0	0	0	0	0	0	0	0
A0A147BF81	Putative serine protease OS=Ixodes ricinus PE=3 SV=1 - [A0A147BF81_IXORI]	388	43.3228	4.99561	1	1	1	2	0	0	0	0	4.03406	4.64	1	2	0	0	0	0	0	0	0	0	0	0	0	0	0	0	0	0	0	0	0	0	0	0	0	0	0	0	0	0	0	0	0	0	0
A0A147BX99	Uncharacterized protein OS=Ixodes ricinus PE=4 SV=1 - [A0A147BX99_IXORI]	1394	151.713	8.01611	5	2	2	2	0	0	0	0	4.27693	1.72	2	2	0	0	0	0	0	0	0	0	0	0	0	0	0	0	0	0	0	0	0	0	0	0	0	0	0	0	0	0	0	0	0	0	0
A0A1E1XER9	Putative transcriptional co-repressor sin3a protein OS=Amblyomma aureolatum PE=2 SV=1 - [A0A1E1XER9_9ACAR]	1373	152.14	7.37158	7	1	2	2	0	0	0	0	0	0	0	0	4.52241	2.18	2	2	0	0	0	0	0	0	0	0	0	0	0	0	0	0	0	0	0	0	0	0	0	0	0	0	0	0	0	0	0
A0A1E1XIC8	Putative tick til 31 (Fragment) OS=Amblyomma aureolatum PE=2 SV=1 - [A0A1E1XIC8_9ACAR]	210	23.9678	9.24658	1	1	1	2	2.20207	7.62	1	2	0	0	0	0	0	0	0	0	0	0	0	0	0	0	0	0	0	0	0	0	0	0	0	0	0	0	0	0	0	0	0	0	0	0	0	0	0
A0A1E1XKA9	Uncharacterized protein (Fragment) OS=Amblyomma sculptum PE=2 SV=1 - [A0A1E1XKA9_9ACAR]	1574	175.004	6.02393	1	2	2	2	4.66786	1.65	2	2	0	0	0	0	0	0	0	0	0	0	0	0	0	0	0	0	0	0	0	0	0	0	0	0	0	0	0	0	0	0	0	0	0	0	0	0	0
A0A1E1XMQ0	Uncharacterized protein (Fragment) OS=Amblyomma sculptum PE=2 SV=1 - [A0A1E1XMQ0_9ACAR]	503	55.3966	7.92822	1	1	1	2	2.29989	2.98	1	2	0	0	0	0	0	0	0	0	0	0	0	0	0	0	0	0	0	0	0	0	0	0	0	0	0	0	0	0	0	0	0	0	0	0	0	0	0
B7P5E2	Sentrin/sumo-specific protease, putative OS=Ixodes scapularis GN=IscW_ISCW016451 PE=4 SV=1 - [B7P5E2_IXOSC]	275	32.0943	8.66064	1	1	1	2	2.37336	5.45	1	2	0	0	0	0	0	0	0	0	0	0	0	0	0	0	0	0	0	0	0	0	0	0	0	0	0	0	0	0	0	0	0	0	0	0	0	0	0
B7PN87	Putative uncharacterized protein (Fragment) OS=Ixodes scapularis GN=IscW_ISCW006502 PE=4 SV=1 - [B7PN87_IXOSC]	211	24.5959	9.86182	1	1	1	2	0	0	0	0	0	0	0	0	4.20498	4.27	1	2	0	0	0	0	0	0	0	0	0	0	0	0	0	0	0	0	0	0	0	0	0	0	0	0	0	0	0	0	0
B7QES9	Rhombotin, putative (Fragment) OS=Ixodes scapularis GN=IscW_ISCW022804 PE=4 SV=1 - [B7QES9_IXOSC]	80	9.14712	6.48096	7	1	1	2	0	0	0	0	0	0	0	0	2.13804	15	1	2	0	0	0	0	0	0	0	0	0	0	0	0	0	0	0	0	0	0	0	0	0	0	0	0	0	0	0	0	0
G3MPH4	Uncharacterized protein OS=Amblyomma maculatum PE=2 SV=1 - [G3MPH4_9ACAR]	510	58.0406	5.12256	6	1	2	2	0	0	0	0	4.2405	5.69	2	2	0	0	0	0	0	0	0	0	0	0	0	0	0	0	0	0	0	0	0	0	0	0	0	0	0	0	0	0	0	0	0	0	0
isotig04323	phospholipase b-like 2-like	514	57.553	7.43018	4	2	2	2	0	0	0	0	0	0	0	0	4.61169	3.31	2	2	0	0	0	0	0	0	0	0	0	0	0	0	0	0	0	0	0	0	0	0	0	0	0	0	0	0	0	0	0
L7LUW4	Uncharacterized protein OS=Rhipicephalus pulchellus PE=2 SV=1 - [L7LUW4_9ACAR]	619	69.7324	6.82959	5	2	2	2	4.64143	3.88	2	2	0	0	0	0	0	0	0	0	0	0	0	0	0	0	0	0	0	0	0	0	0	0	0	0	0	0	0	0	0	0	0	0	0	0	0	0	0
L7M4Z5	Uncharacterized protein OS=Rhipicephalus pulchellus PE=2 SV=1 - [L7M4Z5_9ACAR]	629	72.2364	7.31299	2	1	2	2	0	0	0	0	0	0	0	0	4.14037	4.77	2	2	0	0	0	0	0	0	0	0	0	0	0	0	0	0	0	0	0	0	0	0	0	0	0	0	0	0	0	0	0
L7M632	Uncharacterized protein OS=Rhipicephalus pulchellus PE=2 SV=1 - [L7M632_9ACAR]	950	109.128	8.25049	5	1	2	2	0	0	0	0	0	0	0	0	4.66808	3.05	2	2	0	0	0	0	0	0	0	0	0	0	0	0	0	0	0	0	0	0	0	0	0	0	0	0	0	0	0	0	0
L7MDD6	Uncharacterized protein (Fragment) OS=Rhipicephalus pulchellus PE=2 SV=1 - [L7MDD6_9ACAR]	687	77.712	8.00146	3	1	2	2	0	0	0	0	4.76187	4.37	2	2	0	0	0	0	0	0	0	0	0	0	0	0	0	0	0	0	0	0	0	0	0	0	0	0	0	0	0	0	0	0	0	0	0
L7MGC9	Uncharacterized protein (Fragment) OS=Rhipicephalus pulchellus PE=2 SV=1 - [L7MGC9_9ACAR]	1864	205.535	6.99072	1	1	2	2	0	0	0	0	0	0	0	0	4.17989	1.18	2	2	0	0	0	0	0	0	0	0	0	0	0	0	0	0	0	0	0	0	0	0	0	0	0	0	0	0	0	0	0
Q6B877	Putative peptide 14.4 kDa OS=Ixodes pacificus PE=2 SV=1 - [Q6B877_9ACAR]	154	16.5468	5.50342	2	1	1	2	2.13518	9.74	1	2	0	0	0	0	0	0	0	0	0	0	0	0	0	0	0	0	0	0	0	0	0	0	0	0	0	0	0	0	0	0	0	0	0	0	0	0	0
Q6QT18	KOG1656-like protein OS=Ornithodoros moubata PE=2 SV=1 - [Q6QT18_ORNMO]	223	24.7316	4.76709	1	1	1	2	0	0	0	0	0	0	0	0	4.53507	6.28	1	2	0	0	0	0	0	0	0	0	0	0	0	0	0	0	0	0	0	0	0	0	0	0	0	0	0	0	0	0	0
V5GQC7	Putative disco-related protein (Fragment) OS=Ixodes ricinus PE=2 SV=1 - [V5GQC7_IXORI]	608	66.5003	7.23975	4	1	1	2	0	0	0	0	4.19671	2.3	1	2	0	0	0	0	0	0	0	0	0	0	0	0	0	0	0	0	0	0	0	0	0	0	0	0	0	0	0	0	0	0	0	0	0
V5HCX6	Putative thap domain protein OS=Ixodes ricinus PE=2 SV=1 - [V5HCX6_IXORI]	203	22.9312	8.30908	1	1	1	2	0	0	0	0	0	0	0	0	2.63693	7.88	1	2	0	0	0	0	0	0	0	0	0	0	0	0	0	0	0	0	0	0	0	0	0	0	0	0	0	0	0	0	0
L7MFE2	Putative syntaxin-binding protein 2 (Fragment) OS=Rhipicephalus pulchellus PE=2 SV=1 - [L7MFE2_9ACAR]	205	22.4066	8.19189	1	1	1	7	2.97874	6.34	1	1	0	0	0	0	0	0	0	0	5.4756	6.34	1	2	2.70521	6.34	1	2	5.10951	6.34	1	2	0	0	0	0	0	0	0	0	0	0	0	0	0	0	0	0	0
isotig13475	PREDICTED: uncharacterized protein LOC100900008	179	21.0893	4.90674	2	4	4	30	2.24389	5.59	1	1	0	0	0	0	0	0	0	0	0	0	0	0	2.49109	5.59	1	1	9.75106	11.17	2	4	13.4602	24.02	4	5	14.8399	11.17	2	6	11.8572	18.44	3	4	7.3689	10.61	2	3	4.34528
A0A131Y6P3	Putative ribosomal protein s7 (Fragment) OS=Ixodes ricinus PE=2 SV=1 - [A0A131Y6P3_IXORI]	181	20.2989	10.2134	21	6	6	48	0	0	0	0	2.24586	4.97	1	1	0	0	0	0	2.17116	4.97	1	1	4.89407	5.52	1	2	4.27337	5.52	2	2	18.8388	18.78	4	6	0	0	0	0	8.68942	10.5	3	4	29.5845	21.55	5	9	30.7
A0A1E1XG49	Alpha-mannosidase (Fragment) OS=Amblyomma aureolatum PE=2 SV=1 - [A0A1E1XG49_9ACAR]	1014	113.982	6.44287	6	1	2	12	2.62611	1.18	1	1	0	0	0	0	0	0	0	0	4.75908	2.17	2	2	5.11125	2.17	2	2	2.18565	0.99	1	1	5.45075	2.17	2	2	0	0	0	0	5.10351	2.17	2	2	2.52113	1.18	1	1	0
A0A131YRM0	Pancreatic lipase-related protein 1 OS=Rhipicephalus appendiculatus PE=3 SV=1 - [A0A131YRM0_RHIAP]	478	53.3936	6.31592	3	2	2	10	2.51488	3.14	1	1	0	0	0	0	0	0	0	0	0	0	0	0	2.06677	1.88	1	1	9.53734	5.02	2	4	4.73076	3.14	1	2	0	0	0	0	0	0	0	0	5.0037	3.14	1	2	0
A0A0K8RHN7	Putative metalloprotease OS=Ixodes ricinus PE=2 SV=1 - [A0A0K8RHN7_IXORI]	143	16.454	8.76318	2	1	1	9	0	0	0	0	2.07804	7.69	1	1	0	0	0	0	2.12153	7.69	1	1	4.07842	7.69	1	2	4.09245	7.69	1	2	0	0	0	0	0	0	0	0	2.08536	7.69	1	1	2.10497	7.69	1	1	0
isotig12681	cathepsin l	335	37.0493	6.91748	2	3	4	10	2.45643	2.99	1	1	0	0	0	0	0	0	0	0	5.36028	6.87	2	2	4.69879	5.67	2	2	2.14916	2.99	1	1	0	0	0	0	0	0	0	0	0	0	0	0	4.19649	4.48	1	1	3.91873
A0A0K8RHI3	Putative nmda receptor-regulated protein 2 OS=Ixodes ricinus PE=2 SV=1 - [A0A0K8RHI3_IXORI]	186	21.0837	9.31982	1	1	1	6	2.07001	5.38	1	1	0	0	0	0	0	0	0	0	2.06863	5.38	1	1	6.46007	5.38	1	3	2.15682	5.38	1	1	0	0	0	0	0	0	0	0	0	0	0	0	0	0	0	0	0
A0A131Y7A7	Putative cytochrome p450 cyp3/cyp5/cyp6/cyp9 subfamily protein (Fragment) OS=Ixodes ricinus PE=2 SV=1 - [A0A131Y7A7_IXORI]	130	14.7455	5.87158	1	1	1	6	0	0	0	0	0	0	0	0	2.15653	11.54	1	1	4.45949	11.54	1	2	6.68469	11.54	1	3	0	0	0	0	0	0	0	0	0	0	0	0	0	0	0	0	0	0	0	0	0
V5IBQ1	Putative nonsense-mediated mrna decay 2 protein OS=Ixodes ricinus PE=2 SV=1 - [V5IBQ1_IXORI]	1059	121.159	5.37646	2	1	2	6	0	0	0	0	0	0	0	0	2.13492	1.32	1	1	4.49428	1.32	1	2	4.04308	1.32	1	2	2.01946	1.04	1	1	0	0	0	0	0	0	0	0	0	0	0	0	0	0	0	0	0
isotig10795|cuticle	isotig10795|cuticle	171	17.8809	5.93506	1	1	3	15	0	0	0	0	0	0	0	0	2.06826	7.02	1	1	3.11891	7.6	1	1	3.49577	7.6	1	1	6.12947	7.6	1	2	9.68129	22.22	3	3	7.06409	7.6	1	2	3.0566	7.6	1	1	3.69148	7.6	1	1	3.79551
A0A147BVK3	Serine/threonine-protein phosphatase (Fragment) OS=Ixodes ricinus PE=3 SV=1 - [A0A147BVK3_IXORI]	301	34.16	6.23975	29	1	5	14	0	0	0	0	3.98706	5.65	1	1	0	0	0	0	7.26282	9.3	2	2	4.84554	5.65	1	1	4.73686	5.65	1	1	19.6781	13.95	4	5	0	0	0	0	0	0	0	0	5.16338	6.64	2	2	0
A0A1E1XLM8	Putative ankyrin (Fragment) OS=Amblyomma sculptum PE=2 SV=1 - [A0A1E1XLM8_9ACAR]	3038	328.071	6.91748	14	3	5	12	2.20474	0.53	1	1	0	0	0	0	0	0	0	0	2.84861	0.39	1	1	7.48308	1.38	3	3	0	0	0	0	3.12966	0.39	1	1	5.81421	0.39	1	2	6.306	0.39	1	2	5.23743	0.69	2	2	0
G9NSEKQ01BCVOQ	cathepsin l precursor	104	11.7778	5.73193	4	1	3	13	2.69756	9.62	1	1	0	0	0	0	0	0	0	0	2.13397	9.62	1	1	2.14247	9.62	1	1	4.78333	19.23	2	2	2.27375	9.62	1	1	2.60913	9.62	1	1	2.64252	9.62	1	1	5.74078	9.62	1	2	2.27083
B7PD93	Ran-binding protein, putative OS=Ixodes scapularis GN=IscW_ISCW016612 PE=4 SV=1 - [B7PD93_IXOSC]	1097	121.602	5.2749	2	2	2	8	2.41323	1.09	1	1	0	0	0	0	0	0	0	0	0	0	0	0	4.64844	1.09	1	3	2.29345	1.09	1	1	0	0	0	0	2.17518	0.91	1	1	4.22172	1.09	2	2	0	0	0	0	0
L7MCR3	Putative atp-dependent rna helicase (Fragment) OS=Rhipicephalus pulchellus PE=2 SV=1 - [L7MCR3_9ACAR]	1147	127.729	9.14404	6	4	4	9	0	0	0	0	2.56068	1.48	1	1	0	0	0	0	2.16101	1.39	1	2	2.0041	1.39	1	1	2.42823	1.48	1	1	4.2002	2.27	2	2	0	0	0	0	0	0	0	0	0	0	0	0	0
A0A0K8RQE7	Alpha-mannosidase (Fragment) OS=Ixodes ricinus PE=2 SV=1 - [A0A0K8RQE7_IXORI]	974	109.312	7.56201	6	1	2	8	2.62611	1.23	1	1	0	0	0	0	0	0	0	0	2.67129	1.23	1	1	2.89918	1.23	1	1	4.79355	1.64	1	2	3.2522	1.23	1	1	0	0	0	0	2.8227	1.23	1	1	2.52113	1.23	1	1	0
A0A1E1X4H9	Putative hsp90 co-chaperone cpr7/cyclophilin (Fragment) OS=Amblyomma aureolatum PE=2 SV=1 - [A0A1E1X4H9_9ACAR]	901	98.9155	10.814	1	3	3	7	0	0	0	0	2.62731	2.44	1	1	0	0	0	0	2.31576	2	1	1	7.47454	3.88	2	3	0	0	0	0	2.96505	2.44	1	1	0	0	0	0	2.59253	2.44	1	1	0	0	0	0	0
L7MAY4	Putative tick transposon (Fragment) OS=Rhipicephalus pulchellus PE=2 SV=1 - [L7MAY4_9ACAR]	666	75.3932	9.20264	2	1	1	8	0	0	0	0	0	0	0	0	2.77516	2.1	1	1	2.5551	2.1	1	1	5.07313	2.1	1	2	2.56887	2.1	1	1	2.02385	2.1	1	1	0	0	0	0	0	0	0	0	2.22208	2.1	1	1	0
L7MHJ8	Uncharacterized protein (Fragment) OS=Rhipicephalus pulchellus PE=2 SV=1 - [L7MHJ8_9ACAR]	972	108.922	8.60205	7	3	3	7	0	0	0	0	0	0	0	0	2.15946	1.23	1	1	2.47463	1.23	1	1	4.53372	1.23	1	2	2.35523	1.23	1	1	2.13469	1.23	1	1	0	0	0	0	0	0	0	0	0	0	0	0	2.11802
A0A023FT39	Putative secreted protein (Fragment) OS=Amblyomma parvum PE=2 SV=1 - [A0A023FT39_9ACAR]	118	13.4988	9.21729	3	1	1	6	0	0	0	0	0	0	0	0	2.14985	11.86	1	1	4.30961	11.86	1	2	2.02201	11.86	1	1	2.08445	11.86	1	1	2.03704	11.86	1	1	0	0	0	0	0	0	0	0	0	0	0	0	0
A0A023G0C3	Putative secreted protein OS=Amblyomma parvum PE=2 SV=1 - [A0A023G0C3_9ACAR]	99	10.7251	5.16064	1	1	1	6	0	0	0	0	2.02127	15.15	1	1	0	0	0	0	2.01858	15.15	1	1	2.00555	15.15	1	1	4.14271	15.15	1	2	0	0	0	0	0	0	0	0	2.00418	15.15	1	1	0	0	0	0	0
A0A131Y5S6	Putative peritrophic membrane chitin binding protein (Fragment) OS=Ixodes ricinus PE=2 SV=1 - [A0A131Y5S6_IXORI]	163	19.1725	7.92822	1	1	1	5	0	0	0	0	0	0	0	0	2.19659	9.82	1	1	4.2633	9.82	1	2	0	0	0	0	4.13527	9.82	1	2	0	0	0	0	0	0	0	0	0	0	0	0	0	0	0	0	0
A0A1E1X3Q5	Putative chromatin remodeling complex wstf-iswi small subunit OS=Amblyomma aureolatum PE=2 SV=1 - [A0A1E1X3Q5_9ACAR]	2940	320.546	5.2749	1	1	2	5	2.49568	0.48	1	1	0	0	0	0	0	0	0	0	4.1077	0.51	1	2	2.19346	0.51	1	1	2.01593	0.51	1	1	0	0	0	0	0	0	0	0	0	0	0	0	0	0	0	0	0
A0A1E1X653	Putative tick transposon (Fragment) OS=Amblyomma aureolatum PE=2 SV=1 - [A0A1E1X653_9ACAR]	528	59.8755	7.95752	1	1	1	5	0	0	0	0	2.25749	2.46	1	1	0	0	0	0	2.08597	2.46	1	1	4.56336	2.46	1	2	2.3701	2.46	1	1	0	0	0	0	0	0	0	0	0	0	0	0	0	0	0	0	0
B7PE18	Putative uncharacterized protein (Fragment) OS=Ixodes scapularis GN=IscW_ISCW003856 PE=4 SV=1 - [B7PE18_IXOSC]	196	20.7263	6.20166	1	1	1	5	2.10356	7.65	1	1	0	0	0	0	0	0	0	0	2.12913	7.65	1	1	2.1393	7.65	1	1	4.55054	7.65	1	2	0	0	0	0	0	0	0	0	0	0	0	0	0	0	0	0	0
B7PSJ0	Organic anion transporter, putative OS=Ixodes scapularis GN=IscW_ISCW019502 PE=4 SV=1 - [B7PSJ0_IXOSC]	651	72.4777	8.82178	1	2	2	5	2.09639	1.23	1	1	0	0	0	0	0	0	0	0	4.10082	3.38	2	2	2.14265	2.15	1	1	2.05037	1.23	1	1	0	0	0	0	0	0	0	0	0	0	0	0	0	0	0	0	0
B7PZX6	Putative uncharacterized protein OS=Ixodes scapularis GN=IscW_ISCW020435 PE=4 SV=1 - [B7PZX6_IXOSC]	281	32.4098	4.83057	1	1	1	5	2.20901	5.69	1	1	0	0	0	0	0	0	0	0	0	0	0	0	2.42827	5.69	1	2	2.16703	5.69	1	2	0	0	0	0	0	0	0	0	0	0	0	0	0	0	0	0	0
V5IDJ3	Putative licpodalin-4 1 OS=Ixodes ricinus PE=2 SV=1 - [V5IDJ3_IXORI]	199	22.2951	7.25439	1	2	2	5	0	0	0	0	0	0	0	0	2.02185	7.04	1	1	6.32047	13.57	2	3	0	0	0	0	2.04296	6.53	1	1	0	0	0	0	0	0	0	0	0	0	0	0	0	0	0	0	0
isotig03940	phospholipase a2	399	44.5444	7.6499	2	9	9	27	2.22634	2.51	1	1	0	0	0	0	0	0	0	0	2.40046	2.51	1	1	2.14497	2.51	1	1	2.11103	2.51	1	1	13.2105	12.28	4	5	5.06784	5.01	2	2	4.68957	5.01	2	2	12.6377	12.78	5	5	14.7574
L7LSS7	Putative beta adaptin OS=Rhipicephalus pulchellus PE=2 SV=1 - [L7LSS7_9ACAR]	811	90.197	6.21436	13	3	3	9	2.11192	1.23	1	1	0	0	0	0	0	0	0	0	2.18812	1.23	1	1	4.01841	2.22	2	2	0	0	0	0	4.21966	2.22	2	2	2.2779	1.23	1	1	4.37119	2.22	2	2	0	0	0	0	0
isotig16553	ras gtpase-activating protein-binding protein 2	317	34.9441	6.25244	2	2	2	18	0	0	0	0	2.84579	3.15	1	1	0	0	0	0	2.45262	3.15	1	1	2.7752	3.15	1	1	2.84834	3.15	1	1	2.37875	3.15	1	1	5.1409	3.15	1	2	2.67985	3.15	1	1	7.1949	4.1	1	3	11.5533
A0A131YI98	Nucleoprotein TPR OS=Rhipicephalus appendiculatus PE=4 SV=1 - [A0A131YI98_RHIAP]	2367	259.631	4.91943	2	3	4	5	0	0	0	0	2.786	0.63	1	1	0	0	0	0	0	0	0	0	2.29126	0.51	1	1	4.18213	1.01	2	2	2.05311	0.38	1	1	0	0	0	0	0	0	0	0	0	0	0	0	0
L7M0N5	Putative growth hormone-regulated tbc protein 1 OS=Rhipicephalus pulchellus PE=2 SV=1 - [L7M0N5_9ACAR]	341	39.1596	9.42236	2	1	1	5	0	0	0	0	2.06797	4.99	1	1	0	0	0	0	2.08563	4.99	1	1	4.25241	4.99	1	2	0	0	0	0	2.11502	4.99	1	1	0	0	0	0	0	0	0	0	0	0	0	0	0
V5HE91	Cystathionine beta-synthase (Fragment) OS=Ixodes ricinus PE=2 SV=1 - [V5HE91_IXORI]	531	57.9207	7.1958	5	1	1	6	0	0	0	0	2.30119	2.26	1	1	0	0	0	0	4.57259	2.26	1	2	0	0	0	0	2.42281	2.26	1	1	0	0	0	0	0	0	0	0	0	0	0	0	2.5501	2.26	1	1	0
A0A131YLP4	Protein kinase essential for the initiation of dna replication OS=Rhipicephalus appendiculatus PE=4 SV=1 - [A0A131YLP4_RHIAP]	654	71.5688	8.26514	2	1	3	5	0	0	0	0	0	0	0	0	2.03458	2.29	1	1	4.32402	4.13	2	2	0	0	0	0	2.24231	1.83	1	1	0	0	0	0	0	0	0	0	0	0	0	0	2.11036	1.83	1	1	0
A0A1E1XBI3	Putative exocyst complex subunit sec15 (Fragment) OS=Amblyomma aureolatum PE=2 SV=1 - [A0A1E1XBI3_9ACAR]	724	83.5331	5.71924	9	1	1	5	0	0	0	0	2.77392	2.07	1	1	0	0	0	0	4.86666	2.07	1	2	0	0	0	0	2.72618	2.07	1	1	0	0	0	0	0	0	0	0	0	0	0	0	0	0	0	0	2.20394
L7MD59	Putative 8.9 kDa family member (Fragment) OS=Rhipicephalus pulchellus PE=2 SV=1 - [L7MD59_9ACAR]	105	11.9262	10.5063	1	1	1	5	2.01242	11.43	1	1	0	0	0	0	0	0	0	0	4.358	11.43	1	2	0	0	0	0	2.20033	11.43	1	1	0	0	0	0	0	0	0	0	0	0	0	0	0	0	0	0	2.01883
L7MJV9	Uncharacterized protein (Fragment) OS=Rhipicephalus pulchellus PE=2 SV=1 - [L7MJV9_9ACAR]	958	103.743	9.1001	6	1	3	5	0	0	0	0	0	0	0	0	2.08546	1.46	1	1	0	0	0	0	4.50118	3.24	2	2	2.59686	1.57	1	1	0	0	0	0	0	0	0	0	0	0	0	0	0	0	0	0	0
A0A023FK63	Putative asparaginyl-trna synthetase mitochondrial (Fragment) OS=Amblyomma cajennense PE=2 SV=1 - [A0A023FK63_9ACAR]	322	37.4944	5.56689	6	1	1	4	0	0	0	0	0	0	0	0	2.17079	3.73	1	1	0	0	0	0	4.38981	3.73	1	2	2.43479	3.73	1	1	0	0	0	0	0	0	0	0	0	0	0	0	0	0	0	0	0
A0A023GDJ1	Putative clip-associating protein 1 OS=Amblyomma triste PE=2 SV=1 - [A0A023GDJ1_9ACAR]	1472	162.228	9.21729	1	2	2	4	2.32737	0.88	1	1	0	0	0	0	0	0	0	0	4.37039	0.88	1	2	2.08517	0.75	1	1	0	0	0	0	0	0	0	0	0	0	0	0	0	0	0	0	0	0	0	0	0
A0A0K8RFP9	Putative snare protein syntaxin 1 OS=Ixodes ricinus PE=2 SV=1 - [A0A0K8RFP9_IXORI]	294	34.2118	6.22705	3	1	2	4	0	0	0	0	2.16535	4.76	1	1	0	0	0	0	4.12927	4.42	1	2	2.03203	4.42	1	1	0	0	0	0	0	0	0	0	0	0	0	0	0	0	0	0	0	0	0	0	0
A0A131XDK5	Putative tick transposon (Fragment) OS=Hyalomma excavatum PE=2 SV=1 - [A0A131XDK5_9ACAR]	408	47.1811	9.75928	1	1	1	4	0	0	0	0	0	0	0	0	2.0154	3.68	1	1	2.36851	3.68	1	1	0	0	0	0	4.3219	3.68	1	2	0	0	0	0	0	0	0	0	0	0	0	0	0	0	0	0	0
A0A131XGQ4	Putative valyl-trna synthetase OS=Hyalomma excavatum PE=2 SV=1 - [A0A131XGQ4_9ACAR]	1185	135.513	7.32764	3	2	3	4	0	0	0	0	0	0	0	0	2.75307	0.84	1	1	4.70018	2.19	2	2	2.05445	1.18	1	1	0	0	0	0	0	0	0	0	0	0	0	0	0	0	0	0	0	0	0	0	0
A0A1E1X8A0	Tyrosine--tRNA ligase OS=Amblyomma aureolatum PE=2 SV=1 - [A0A1E1X8A0_9ACAR]	529	58.8846	6.90283	5	2	2	4	0	0	0	0	0	0	0	0	2.29676	2.08	1	1	0	0	0	0	2.72106	3.21	1	1	4.26318	2.08	1	2	0	0	0	0	0	0	0	0	0	0	0	0	0	0	0	0	0
isotig05653	cdgsh iron sulfur domain 1	107	11.8147	8.54346	1	2	2	12	0	0	0	0	0	0	0	0	2.49093	12.15	1	1	2.4	12.15	1	1	2.12118	12.15	1	1	0	0	0	0	2.77051	12.15	1	1	9.99051	22.43	2	4	3.39791	12.15	1	1	2.99182	12.15	1	1	2.51692
isotig17941	transmembrane emp24 domain-containing protein 10 precursor	196	22.3842	6.53662	1	3	3	11	0	0	0	0	0	0	0	0	2.53307	8.67	1	1	2.50662	6.63	1	1	2.28983	6.63	1	1	0	0	0	0	11.3817	11.73	2	4	0	0	0	0	0	0	0	0	3.247	6.63	1	1	3.71431
B7P8A1	Monooxygenase, putative OS=Ixodes scapularis GN=IscW_ISCW016718 PE=4 SV=1 - [B7P8A1_IXOSC]	377	42.7794	8.57275	1	1	2	10	0	0	0	0	2.0616	3.71	1	1	0	0	0	0	2.05581	3.71	1	1	0	0	0	0	2.28902	2.92	1	1	0	0	0	0	4.45933	2.92	1	2	4.69414	2.92	1	2	0	0	0	0	2.13525
A0A131XD05	Ubiquitin thioesterase OS=Hyalomma excavatum PE=2 SV=1 - [A0A131XD05_9ACAR]	269	31.5718	5.23682	9	2	2	10	2.05785	3.35	1	1	0	0	0	0	0	0	0	0	2.00935	3.35	1	1	2.01219	3.35	1	1	0	0	0	0	2.06801	3.35	1	1	2.08242	3.35	1	1	2.05905	3.35	1	1	0	0	0	0	4.34543
A0A0A7DS56	Pyruvate kinase OS=Rhipicephalus microplus PE=2 SV=1 - [A0A0A7DS56_RHIMP]	528	57.7146	6.53662	3	1	3	7	0	0	0	0	2.06953	2.27	1	1	0	0	0	0	3.03135	2.27	1	1	2.95934	2.27	1	1	0	0	0	0	3.0257	2.27	1	1	0	0	0	0	5.17384	2.27	2	2	2.33902	2.08	1	1	0
A0A023GK52	Putative exocyst complex component 7 (Fragment) OS=Amblyomma triste PE=2 SV=1 - [A0A023GK52_9ACAR]	434	47.7179	7.23975	4	1	1	6	0	0	0	0	2.14232	2.3	1	1	0	0	0	0	2.04849	2.3	1	1	2.22506	2.3	1	1	0	0	0	0	2.14753	2.3	1	1	0	0	0	0	4.45058	2.3	1	2	0	0	0	0	0
G3MFY5	Uncharacterized protein (Fragment) OS=Amblyomma maculatum PE=2 SV=1 - [G3MFY5_9ACAR]	200	22.7778	8.00146	9	2	2	9	0	0	0	0	2.41953	4.5	1	1	0	0	0	0	0	0	0	0	2.00881	4.5	1	1	2.62635	4.5	1	1	0	0	0	0	2.10605	4.5	1	1	2.16357	4.5	1	1	2.94874	4.5	1	1	4.77193
A0A023FJQ9	Uncharacterized protein (Fragment) OS=Amblyomma cajennense PE=2 SV=1 - [A0A023FJQ9_9ACAR]	282	30.1722	8.35303	1	1	1	7	0	0	0	0	0	0	0	0	2.23346	5.32	1	1	4.49143	5.32	1	2	0	0	0	0	0	0	0	0	0	0	0	0	2.14281	5.32	1	1	2.20622	5.32	1	1	2.61657	5.32	1	1	0
A0A131YUV9	Cyclin-D1-binding protein 1-like protein OS=Rhipicephalus appendiculatus PE=4 SV=1 - [A0A131YUV9_RHIAP]	330	37.3534	4.93213	1	1	1	5	0	0	0	0	2.53406	4.55	1	1	0	0	0	0	0	0	0	0	5.07484	4.55	1	2	0	0	0	0	2.89027	4.55	1	1	0	0	0	0	2.58873	4.55	1	1	0	0	0	0	0
A0A131YXD3	Vigilin OS=Rhipicephalus appendiculatus PE=4 SV=1 - [A0A131YXD3_RHIAP]	1281	143.428	6.48096	2	1	3	5	0	0	0	0	2.00068	0.94	1	1	0	0	0	0	0	0	0	0	4.67734	1.25	1	2	0	0	0	0	4.22045	1.17	1	2	0	0	0	0	0	0	0	0	0	0	0	0	0
A0A1E1XG73	Putative myosin heavy polypeptide 9 (Fragment) OS=Amblyomma aureolatum PE=2 SV=1 - [A0A1E1XG73_9ACAR]	391	43.6478	6.75635	1	2	2	5	0	0	0	0	2.62097	4.6	1	1	0	0	0	0	2.09831	3.58	1	1	2.1793	3.58	1	1	0	0	0	0	4.32422	3.58	1	2	0	0	0	0	0	0	0	0	0	0	0	0	0
isotig05432	hypothetical secreted protein 1669 - [tpa_inf:]	214	23.0531	10.4038	2	1	2	5	3.19146	8.41	1	1	0	0	0	0	0	0	0	0	0	0	0	0	2.89373	8.41	1	1	2.8398	8.41	1	1	6.50951	14.02	2	2	0	0	0	0	0	0	0	0	0	0	0	0	0
isotig27743	proclotting enzyme-like	211	23.5759	10.2134	1	1	1	5	2.29072	6.64	1	1	0	0	0	0	0	0	0	0	0	0	0	0	0	0	0	0	2.22034	6.64	1	2	2.16447	6.64	1	2	0	0	0	0	0	0	0	0	0	0	0	0	0
A0A1E1XEG6	Putative guanylate-binding protein (Fragment) OS=Amblyomma aureolatum PE=2 SV=1 - [A0A1E1XEG6_9ACAR]	516	60.1232	5.12256	1	1	1	5	0	0	0	0	0	0	0	0	2.05475	2.13	1	1	4.42127	2.13	1	2	0	0	0	0	0	0	0	0	0	0	0	0	0	0	0	0	2.17684	2.13	1	1	2.05319	2.13	1	1	0
A0A131XCI5	Putative nonsense-mediated mrna decay protein OS=Hyalomma excavatum PE=2 SV=1 - [A0A131XCI5_9ACAR]	813	90.4485	6.90283	8	1	2	4	2.1142	1.23	1	1	0	0	0	0	0	0	0	0	0	0	0	0	0	0	0	0	4.42062	1.23	1	2	2.37303	2.09	1	1	0	0	0	0	0	0	0	0	0	0	0	0	0
A0A131YQH4	Peptidylprolyl isomerase OS=Rhipicephalus appendiculatus PE=4 SV=1 - [A0A131YQH4_RHIAP]	461	51.9632	5.79541	1	1	2	4	0	0	0	0	2.0444	2.17	1	1	0	0	0	0	0	0	0	0	2.23798	3.69	1	2	0	0	0	0	0	0	0	0	2.12444	2.17	1	1	0	0	0	0	0	0	0	0	0
B7PK83	Putative uncharacterized protein OS=Ixodes scapularis GN=IscW_ISCW003626 PE=4 SV=1 - [B7PK83_IXOSC]	632	68.1414	9.18799	1	2	2	4	0	0	0	0	0	0	0	0	2.00088	2.06	1	1	0	0	0	0	4.40986	4.11	2	2	0	0	0	0	0	0	0	0	0	0	0	0	2.42083	2.06	1	1	0	0	0	0	0
A0A131YNT7	Protein phosphatase 1 regulatory subunit 10 OS=Rhipicephalus appendiculatus PE=4 SV=1 - [A0A131YNT7_RHIAP]	926	99.0702	8.39697	1	1	2	8	0	0	0	0	2.35367	1.84	1	1	0	0	0	0	4.37067	1.84	1	2	0	0	0	0	0	0	0	0	0	0	0	0	0	0	0	0	0	0	0	0	4.3907	1.84	1	2	4.61954
A0A147BNL0	Putative inhibitor of type v adenylyl cyclase/neuronal presynaptic protein highwire/pam/rpm-1 OS=Ixodes ricinus PE=4 SV=1 - [A0A147BNL0_IXORI]	4849	521.045	6.93213	2	2	2	6	2.13828	0.33	1	1	0	0	0	0	0	0	0	0	0	0	0	0	0	0	0	0	4.23474	0.33	1	2	0	0	0	0	0	0	0	0	0	0	0	0	0	0	0	0	5.75622
A0A147BPC1	Putative enspm-14 os (Fragment) OS=Ixodes ricinus PE=4 SV=1 - [A0A147BPC1_IXORI]	852	94.9008	7.40088	2	2	3	5	0	0	0	0	0	0	0	0	2.34202	1.64	1	1	2.33139	1.17	1	1	2.07263	1.17	1	1	0	0	0	0	0	0	0	0	0	0	0	0	0	0	0	0	0	0	0	0	0
A0A1D2AHQ6	Endoplasmic reticulum aminopeptidase 2 like (Fragment) OS=Ornithodoros brasiliensis PE=4 SV=1 - [A0A1D2AHQ6_ORNBR]	302	34.455	5.46533	1	1	1	5	0	0	0	0	0	0	0	0	2.44334	3.97	1	1	0	0	0	0	4.08782	3.97	1	2	0	0	0	0	0	0	0	0	0	0	0	0	0	0	0	0	2.49928	3.97	1	1	2.03501
A0A023FFJ4	Uncharacterized protein OS=Amblyomma cajennense PE=2 SV=1 - [A0A023FFJ4_9ACAR]	206	23.3022	8.67529	1	1	2	4	2.05142	4.85	1	1	0	0	0	0	0	0	0	0	0	0	0	0	4.858	10.19	2	2	0	0	0	0	0	0	0	0	0	0	0	0	0	0	0	0	0	0	0	0	2.14141
A0A090XEN7	Putative l1 transposable element (Fragment) OS=Ixodes ricinus PE=2 SV=1 - [A0A090XEN7_IXORI]	96	11.4068	9.75928	1	1	1	4	2.07269	7.29	1	1	0	0	0	0	0	0	0	0	4.51739	7.29	1	2	0	0	0	0	0	0	0	0	0	0	0	0	0	0	0	0	0	0	0	0	2.0245	7.29	1	1	0
A0A1E1X8W1	Transporter (Fragment) OS=Amblyomma aureolatum PE=2 SV=1 - [A0A1E1X8W1_9ACAR]	611	68.0704	8.48486	1	1	1	4	2.04187	2.62	1	1	0	0	0	0	0	0	0	0	4.98615	2.62	1	2	0	0	0	0	0	0	0	0	0	0	0	0	0	0	0	0	0	0	0	0	2.23256	2.62	1	1	0
isotig19389	acyl-protein thioesterase 1-like	406	43.0085	8.646	1	1	1	4	2.68152	3.45	1	1	0	0	0	0	0	0	0	0	0	0	0	0	6.36566	3.45	1	2	0	0	0	0	0	0	0	0	0	0	0	0	0	0	0	0	2.6	3.45	1	1	0
A0A023G0Q5	Putative tick til 1 OS=Amblyomma parvum PE=2 SV=1 - [A0A023G0Q5_9ACAR]	239	26.1449	8.85107	1	1	1	3	0	0	0	0	2.86036	6.69	1	1	0	0	0	0	2.56049	6.69	1	2	0	0	0	0	0	0	0	0	0	0	0	0	0	0	0	0	0	0	0	0	0	0	0	0	0
A0A023GKW1	Amino acid transporter OS=Amblyomma triste PE=2 SV=1 - [A0A023GKW1_9ACAR]	509	54.8857	6.07471	1	1	1	3	2.00346	3.34	1	1	0	0	0	0	0	0	0	0	4.644	3.34	1	2	0	0	0	0	0	0	0	0	0	0	0	0	0	0	0	0	0	0	0	0	0	0	0	0	0
A0A131Z958	Uncharacterized protein (Fragment) OS=Rhipicephalus appendiculatus PE=4 SV=1 - [A0A131Z958_RHIAP]	123	14.2846	5.33838	1	1	1	3	0	0	0	0	0	0	0	0	2.00506	14.63	1	1	4.72535	14.63	1	2	0	0	0	0	0	0	0	0	0	0	0	0	0	0	0	0	0	0	0	0	0	0	0	0	0
A0A1E1X8L2	Putative golgin-45-like protein (Fragment) OS=Amblyomma aureolatum PE=2 SV=1 - [A0A1E1X8L2_9ACAR]	361	39.384	6.78564	1	1	1	3	0	0	0	0	0	0	0	0	2.00003	3.88	1	1	0	0	0	0	0	0	0	0	4.14262	3.88	1	2	0	0	0	0	0	0	0	0	0	0	0	0	0	0	0	0	0
B5M724	Hypothetical conserved secreted protein OS=Amblyomma americanum PE=2 SV=1 - [B5M724_AMBAM]	208	23.389	8.60205	1	1	1	3	2.28599	7.69	1	1	0	0	0	0	0	0	0	0	4.57814	7.69	1	2	0	0	0	0	0	0	0	0	0	0	0	0	0	0	0	0	0	0	0	0	0	0	0	0	0
B7PWI4	Valacyclovir hydrolase, putative (Fragment) OS=Ixodes scapularis GN=IscW_ISCW019272 PE=4 SV=1 - [B7PWI4_IXOSC]	331	37.5581	8.6167	1	1	1	3	2.2837	4.23	1	1	0	0	0	0	0	0	0	0	0	0	0	0	4.16506	4.23	1	2	0	0	0	0	0	0	0	0	0	0	0	0	0	0	0	0	0	0	0	0	0
B7Q305	Gamma-interferon inducible lysosomal thiol reductase, putative (Fragment) OS=Ixodes scapularis GN=IscW_ISCW024577 PE=4 SV=1 - [B7Q305_IXOSC]	209	23.4111	9.17334	1	1	1	3	2.2448	8.61	1	1	0	0	0	0	0	0	0	0	0	0	0	0	4.24163	8.61	1	2	0	0	0	0	0	0	0	0	0	0	0	0	0	0	0	0	0	0	0	0	0
E2J6Q8	Bilaris OS=Hyalomma rufipes PE=2 SV=1 - [E2J6Q8_9ACAR]	179	19.8731	4.67822	1	1	1	3	2.15308	8.94	1	1	0	0	0	0	0	0	0	0	4.67918	8.94	1	2	0	0	0	0	0	0	0	0	0	0	0	0	0	0	0	0	0	0	0	0	0	0	0	0	0
F0J8R3	Serine proteinase inhibitor (Fragment) OS=Amblyomma variegatum PE=2 SV=1 - [F0J8R3_AMBVA]	229	26.6914	7.69385	1	1	2	3	0	0	0	0	2.12843	6.11	1	1	0	0	0	0	4.35462	6.55	1	2	0	0	0	0	0	0	0	0	0	0	0	0	0	0	0	0	0	0	0	0	0	0	0	0	0
isotig22004	nose resistant to fluoxetine protein 6-like	366	41.0913	5.30029	1	2	2	3	2.03853	3.28	1	1	0	0	0	0	0	0	0	0	0	0	0	0	4.60638	7.65	2	2	0	0	0	0	0	0	0	0	0	0	0	0	0	0	0	0	0	0	0	0	0
L7LUU6	Uncharacterized protein OS=Rhipicephalus pulchellus PE=2 SV=1 - [L7LUU6_9ACAR]	1564	171.892	6.34131	4	1	1	3	0	0	0	0	2.23409	0.83	1	1	0	0	0	0	4.11116	0.83	1	2	0	0	0	0	0	0	0	0	0	0	0	0	0	0	0	0	0	0	0	0	0	0	0	0	0
L7ML42	Uncharacterized protein (Fragment) OS=Rhipicephalus pulchellus PE=2 SV=1 - [L7ML42_9ACAR]	1494	165.133	4.97021	1	1	1	3	2.21281	0.94	1	1	0	0	0	0	0	0	0	0	4.15006	0.94	1	2	0	0	0	0	0	0	0	0	0	0	0	0	0	0	0	0	0	0	0	0	0	0	0	0	0
isotig11090	chymotrypsin b-like	283	30.9591	8.71924	1	9	9	32	2.331	2.83	1	1	0	0	0	0	0	0	0	0	0	0	0	0	0	0	0	0	2.07707	2.47	1	1	21.2175	23.32	6	7	4.67563	5.3	2	2	6.47609	5.3	2	3	30.4453	23.32	6	9	18.2199
A0A1E1XMT1	Putative pdz domain-containing protein OS=Amblyomma sculptum PE=2 SV=1 - [A0A1E1XMT1_9ACAR]	963	103.061	9.17334	3	1	2	8	0	0	0	0	0	0	0	0	2.43563	1.56	1	1	0	0	0	0	0	0	0	0	2.09417	1.56	1	1	9.53851	1.56	1	4	2.27053	1.56	1	1	0	0	0	0	0	0	0	0	2.11303
A0A1E1X7B4	Uncharacterized protein (Fragment) OS=Amblyomma aureolatum PE=2 SV=1 - [A0A1E1X7B4_9ACAR]	1029	112.553	6.52197	5	1	2	10	0	0	0	0	0	0	0	0	2.02672	1.36	1	1	0	0	0	0	0	0	0	0	2.11479	1.36	1	1	7.17762	3.21	2	3	0	0	0	0	0	0	0	0	4.04136	3.21	2	2	2.02164
A0A1E1XEH7	Glycerol-3-phosphate dehydrogenase [NAD(+)] OS=Amblyomma aureolatum PE=2 SV=1 - [A0A1E1XEH7_9ACAR]	349	38.3708	6.52197	11	4	5	9	2.63582	3.15	1	1	0	0	0	0	0	0	0	0	2.5237	3.72	1	1	0	0	0	0	0	0	0	0	0	0	0	0	0	0	0	0	8.36857	7.16	2	3	2.78578	2.58	1	1	0
V5HHP6	Putative alternative splicing factor asf/sf2 OS=Ixodes ricinus PE=2 SV=1 - [V5HHP6_IXORI]	181	20.6302	8.55811	8	3	3	10	2.27617	5.52	1	1	0	0	0	0	0	0	0	0	0	0	0	0	0	0	0	0	2.0873	3.87	1	1	4.74912	9.39	2	2	0	0	0	0	0	0	0	0	6.99821	13.81	3	3	4.86067
A0A1E1XJG7	Putative alpha/beta hydrolase bat5 (Fragment) OS=Amblyomma sculptum PE=2 SV=1 - [A0A1E1XJG7_9ACAR]	394	43.722	5.56689	1	1	1	8	0	0	0	0	2.7518	2.28	1	1	0	0	0	0	0	0	0	0	0	0	0	0	2.50158	2.28	1	1	2.37653	2.28	1	1	0	0	0	0	2.05394	2.28	1	1	2.28684	2.28	1	1	2.34271
A0A147B9X4	Calcium transporting atpase sarcoplasmic endoplasmic reticulum type like (Fragment) OS=Carios mimon PE=4 SV=1 - [A0A147B9X4_9ACAR]	366	39.5492	7.35693	2	1	2	7	0	0	0	0	0	0	0	0	2.25442	4.1	1	1	0	0	0	0	2.44408	4.1	1	1	0	0	0	0	6.43904	4.1	1	2	0	0	0	0	0	0	0	0	3.78225	4.1	1	1	3.08729
isotig17089	carbonyl reductase	96	10.6016	9.20264	1	2	2	6	2.11485	9.38	1	1	0	0	0	0	0	0	0	0	0	0	0	0	0	0	0	0	2.43292	9.38	1	1	4.39458	17.71	2	2	0	0	0	0	0	0	0	0	0	0	0	0	2.09135
A0A131XRW5	Putative golgin subfamily protein b member 1 (Fragment) OS=Ixodes ricinus PE=2 SV=1 - [A0A131XRW5_IXORI]	3102	351.937	4.98291	4	3	4	5	0	0	0	0	0	0	0	0	2.85058	0.39	1	1	0	0	0	0	2.45515	0.39	1	1	0	0	0	0	4.41463	0.81	2	2	0	0	0	0	0	0	0	0	0	0	0	0	0
A0A131YKJ3	Midasin OS=Rhipicephalus appendiculatus PE=4 SV=1 - [A0A131YKJ3_RHIAP]	4927	545.664	5.68115	1	1	5	5	0	0	0	0	0	0	0	0	2.14116	0.24	1	1	0	0	0	0	0	0	0	0	2.22599	0.3	1	1	4.37466	0.57	2	2	0	0	0	0	0	0	0	0	0	0	0	0	2.41655
B7P4E7	Putative uncharacterized protein OS=Ixodes scapularis GN=IscW_ISCW015812 PE=4 SV=1 - [B7P4E7_IXOSC]	405	43.6373	10.6235	1	1	1	5	0	0	0	0	2.14149	3.95	1	1	0	0	0	0	0	0	0	0	2.06915	3.95	1	1	0	0	0	0	4.65058	3.95	1	2	0	0	0	0	0	0	0	0	2.14699	3.95	1	1	0
A0A147BW57	Putative salivary lipocalin OS=Ixodes ricinus PE=4 SV=1 - [A0A147BW57_IXORI]	259	29.2519	6.41748	1	1	2	4	0	0	0	0	0	0	0	0	2.20563	6.95	1	1	0	0	0	0	2.00679	6.18	1	1	0	0	0	0	2.4054	6.18	1	2	0	0	0	0	0	0	0	0	0	0	0	0	0
A0A147BX75	Putative zinc-binding oxidoreductase (Fragment) OS=Ixodes ricinus PE=4 SV=1 - [A0A147BX75_IXORI]	336	35.9625	7.78174	1	1	1	4	0	0	0	0	0	0	0	0	2.09257	5.06	1	1	0	0	0	0	0	0	0	0	2.39041	5.06	1	1	0	0	0	0	0	0	0	0	2.71884	5.06	1	2	0	0	0	0	0
A0A1E1XEP6	Putative snare protein tlg1/syntaxin 6 OS=Amblyomma aureolatum PE=2 SV=1 - [A0A1E1XEP6_9ACAR]	216	24.4256	6.3667	1	1	1	4	0	0	0	0	0	0	0	0	2.09838	8.33	1	1	0	0	0	0	2.36164	8.33	1	1	0	0	0	0	4.13775	8.33	1	2	0	0	0	0	0	0	0	0	0	0	0	0	0
L7LS11	Uncharacterized protein OS=Rhipicephalus pulchellus PE=2 SV=1 - [L7LS11_9ACAR]	279	30.8359	9.29053	1	1	1	4	0	0	0	0	2.20536	6.09	1	1	0	0	0	0	2.06589	6.09	1	1	0	0	0	0	0	0	0	0	0	0	0	0	0	0	0	0	4.41245	6.09	1	2	0	0	0	0	0
A0A1E1XKD3	Uncharacterized protein (Fragment) OS=Amblyomma sculptum PE=2 SV=1 - [A0A1E1XKD3_9ACAR]	1089	117.219	5.93506	6	1	3	7	0	0	0	0	2.09685	1.38	1	1	0	0	0	0	0	0	0	0	0	0	0	0	2.12232	0.92	1	1	2.27865	1.74	1	1	0	0	0	0	0	0	0	0	2.01773	1.74	1	1	2.02164
G3MI29	Uncharacterized protein (Fragment) OS=Amblyomma maculatum PE=2 SV=1 - [G3MI29_9ACAR]	508	55.0877	8.52881	2	1	1	7	0	0	0	0	2.42774	2.76	1	1	0	0	0	0	0	0	0	0	2.38979	2.76	1	1	0	0	0	0	0	0	0	0	0	0	0	0	2.02819	2.76	1	1	4.48563	2.76	1	2	2.39784
A0A1E1XIN0	V-type proton ATPase subunit C (Fragment) OS=Amblyomma aureolatum PE=2 SV=1 - [A0A1E1XIN0_9ACAR]	382	43.7627	7.84033	10	1	3	6	3.32572	4.19	1	1	0	0	0	0	0	0	0	0	0	0	0	0	2.5109	4.19	1	1	0	0	0	0	2.08948	2.09	1	1	0	0	0	0	0	0	0	0	4.23755	4.97	2	2	0
B7P3M5	Putative uncharacterized protein (Fragment) OS=Ixodes scapularis GN=IscW_ISCW015964 PE=4 SV=1 - [B7P3M5_IXOSC]	915	97.7457	8.01611	1	1	1	6	0	0	0	0	0	0	0	0	2.00201	1.75	1	1	0	0	0	0	0	0	0	0	2.30684	1.75	1	1	0	0	0	0	0	0	0	0	2.17623	1.75	1	1	0	0	0	0	2.08365
isotig12345	palmitoyl-protein thioesterase 1	300	33.849	5.52881	1	4	4	6	0	0	0	0	0	0	0	0	2.41448	3	1	1	0	0	0	0	2.97356	5.67	1	1	0	0	0	0	2.33835	3	1	1	0	0	0	0	0	0	0	0	8.25102	3.33	2	3	0
A0A1E1XM78	Putative drim down-regulated in metastasis-like protein (Fragment) OS=Amblyomma sculptum PE=2 SV=1 - [A0A1E1XM78_9ACAR]	2342	261.031	7.29834	1	4	4	5	2.04978	0.47	1	1	0	0	0	0	0	0	0	0	0	0	0	0	0	0	0	0	2.09432	0.68	1	1	0	0	0	0	0	0	0	0	2.17261	0.47	1	1	0	0	0	0	0
A0A1E1X249	Putative piggybac transposable element-derived (Fragment) OS=Amblyomma aureolatum PE=2 SV=1 - [A0A1E1X249_9ACAR]	465	52.9451	9.53955	1	1	1	8	0	0	0	0	0	0	0	0	2.0417	3.44	1	1	2.00096	3.44	1	1	0	0	0	0	0	0	0	0	0	0	0	0	0	0	0	0	0	0	0	0	4.31547	3.44	1	3	2.39704
A0A023GD80	Uncharacterized protein (Fragment) OS=Amblyomma triste PE=2 SV=1 - [A0A023GD80_9ACAR]	724	78.8852	5.05908	1	1	1	6	0	0	0	0	0	0	0	0	2.20611	1.38	1	1	0	0	0	0	0	0	0	0	2.08471	1.38	1	1	0	0	0	0	0	0	0	0	0	0	0	0	2.04278	1.38	1	1	2.19531
A0A131Y1E2	Putative phosphoribosylpyrophosphate synthetase-associated protein (Fragment) OS=Ixodes ricinus PE=2 SV=1 - [A0A131Y1E2_IXORI]	342	37.367	6.52197	11	2	3	6	3.68103	4.97	1	1	0	0	0	0	0	0	0	0	0	0	0	0	0	0	0	0	2.01516	4.39	1	1	0	0	0	0	0	0	0	0	0	0	0	0	3.7608	4.39	1	1	2.91718
A0A1E1X334	Glucose-6-phosphate 1-dehydrogenase OS=Amblyomma aureolatum PE=2 SV=1 - [A0A1E1X334_9ACAR]	515	58.627	7.75244	21	2	2	6	0	0	0	0	2.14202	1.75	1	1	0	0	0	0	0	0	0	0	0	0	0	0	2.55677	1.75	1	1	0	0	0	0	0	0	0	0	0	0	0	0	4.97543	3.69	2	2	2.28295
A0A0C9SFJ9	Putative glycine-rich cell wall structural protein OS=Amblyomma americanum PE=2 SV=1 - [A0A0C9SFJ9_AMBAM]	372	36.6085	10.272	1	1	1	5	2.0477	2.15	1	1	0	0	0	0	0	0	0	0	0	0	0	0	0	0	0	0	2.40893	2.15	1	1	0	0	0	0	0	0	0	0	0	0	0	0	0	0	0	0	2.02027
A0A147BG50	Putative cysteine-rich domain of the smoothened receptor OS=Ixodes ricinus PE=3 SV=1 - [A0A147BG50_IXORI]	1312	142.324	8.25049	1	2	2	4	2.02641	1.14	1	1	0	0	0	0	0	0	0	0	0	0	0	0	0	0	0	0	2.06653	0.99	1	1	0	0	0	0	0	0	0	0	0	0	0	0	0	0	0	0	4.12371
B7P585	Phosphoglycerate kinase OS=Ixodes scapularis GN=IscW_ISCW015616 PE=3 SV=1 - [B7P585_IXOSC]	415	44.002	8.30908	6	2	3	4	0	0	0	0	0	0	0	0	2.34583	4.34	1	1	0	0	0	0	0	0	0	0	2.05572	2.89	1	1	0	0	0	0	0	0	0	0	0	0	0	0	0	0	0	0	0
B7P5M6	Putative uncharacterized protein (Fragment) OS=Ixodes scapularis GN=IscW_ISCW000069 PE=4 SV=1 - [B7P5M6_IXOSC]	717	78.0217	8.52881	1	1	1	4	0	0	0	0	0	0	0	0	2.11815	1.67	1	1	0	0	0	0	0	0	0	0	2.24567	1.67	1	1	0	0	0	0	0	0	0	0	0	0	0	0	0	0	0	0	4.30042
B7Q0N0	Ubiquitin-specific protease, putative OS=Ixodes scapularis GN=IscW_ISCW009539 PE=3 SV=1 - [B7Q0N0_IXOSC]	351	40.2561	8.5874	10	1	1	5	0	0	0	0	2.21734	4.27	1	1	0	0	0	0	0	0	0	0	0	0	0	0	0	0	0	0	4.56178	4.27	1	4	0	0	0	0	0	0	0	0	0	0	0	0	0
A0A131XQ97	Ribosomal protein (Fragment) OS=Hyalomma excavatum PE=2 SV=1 - [A0A131XQ97_9ACAR]	164	18.4831	9.90576	14	2	2	8	0	0	0	0	2.05537	4.88	1	1	0	0	0	0	0	0	0	0	0	0	0	0	0	0	0	0	2.0452	4.88	1	1	2.06806	4.88	1	1	2.0632	4.88	1	1	2.29333	4.88	1	1	4.15527
A0A147B7I8	Cg4236 (Fragment) OS=Carios mimon PE=4 SV=1 - [A0A147B7I8_9ACAR]	347	38.7357	4.90674	18	2	3	8	0	0	0	0	2.26525	3.46	1	1	0	0	0	0	0	0	0	0	0	0	0	0	0	0	0	0	5.73124	6.05	2	2	3.02118	3.75	1	1	0	0	0	0	5.29066	6.05	2	2	3.06213
L7M4Q5	Uncharacterized protein OS=Rhipicephalus pulchellus PE=2 SV=1 - [L7M4Q5_9ACAR]	1750	191.817	9.72998	1	3	3	8	0	0	0	0	0	0	0	0	2.03048	0.8	1	1	0	0	0	0	0	0	0	0	0	0	0	0	4.47078	0.86	1	2	0	0	0	0	2.20894	0.86	1	1	4.38316	0.74	1	2	2.07406
L7LUH7	Putative gpi-anchored cell surface glycoprotein flocculin OS=Rhipicephalus pulchellus PE=2 SV=1 - [L7LUH7_9ACAR]	834	87.7811	6.50732	2	1	1	5	0	0	0	0	0	0	0	0	2.33607	1.56	1	1	0	0	0	0	0	0	0	0	0	0	0	0	0	0	0	0	6.99281	1.56	1	3	0	0	0	0	2.10365	1.56	1	1	0
A0A131Y4S4	Putative tick transposon (Fragment) OS=Ixodes ricinus PE=2 SV=1 - [A0A131Y4S4_IXORI]	1298	146.139	8.57275	1	3	3	4	2.24905	1.16	1	1	0	0	0	0	0	0	0	0	0	0	0	0	0	0	0	0	0	0	0	0	4.61475	1.31	1	2	0	0	0	0	2.05021	1.08	1	1	0	0	0	0	0
isotig17428	low-density lipoprotein receptor domain class a	853	92.273	6.23975	1	4	4	4	2.52376	1.29	1	1	0	0	0	0	0	0	0	0	0	0	0	0	0	0	0	0	0	0	0	0	6.77192	3.63	2	2	0	0	0	0	2.08385	1.17	1	1	0	0	0	0	0
V5GRA5	Putative pyrophosphate-dependent phosphofructo-1-kinase (Fragment) OS=Ixodes ricinus PE=2 SV=1 - [V5GRA5_IXORI]	774	84.4672	7.91357	4	1	2	4	0	0	0	0	0	0	0	0	2.43627	1.16	1	1	0	0	0	0	0	0	0	0	0	0	0	0	6.748	2.33	2	3	0	0	0	0	0	0	0	0	0	0	0	0	0
A0A131XDH2	Putative beta-spectrin (Fragment) OS=Hyalomma excavatum PE=2 SV=1 - [A0A131XDH2_9ACAR]	2300	263.42	5.32568	1	1	3	7	0	0	0	0	2.00116	0.65	1	1	0	0	0	0	0	0	0	0	0	0	0	0	0	0	0	0	2.04674	0.57	1	1	2.28582	0.57	1	1	0	0	0	0	4.55579	1.04	2	2	0
A0A023FX00	Succinate--CoA ligase [GDP-forming] subunit beta, mitochondrial OS=Amblyomma parvum PE=2 SV=1 - [A0A023FX00_9ACAR]	383	41.0284	5.18604	12	2	3	6	0	0	0	0	2.22727	2.61	1	1	0	0	0	0	0	0	0	0	0	0	0	0	0	0	0	0	2.53998	2.61	1	1	0	0	0	0	2.16652	2.61	1	1	3.29653	2.61	1	1	4.12147
A0A023GK70	Putative geranylgeranyl pyrophosphate synthase/polyprenyl synthetase OS=Amblyomma triste PE=2 SV=1 - [A0A023GK70_9ACAR]	287	33.0281	6.23975	10	1	2	6	0	0	0	0	0	0	0	0	2.18795	4.53	1	1	0	0	0	0	0	0	0	0	0	0	0	0	2.68416	3.48	1	1	0	0	0	0	2.0728	4.53	1	1	5.20255	8.01	2	2	0
A0A131XT37	Mitogen-activated protein kinase (Fragment) OS=Ixodes ricinus PE=2 SV=1 - [A0A131XT37_IXORI]	360	40.729	6.88818	31	1	2	6	0	0	0	0	2.20277	4.72	1	1	0	0	0	0	0	0	0	0	0	0	0	0	0	0	0	0	4.74087	2.22	1	2	0	0	0	0	0	0	0	0	2.40309	2.22	1	1	2.30906
A0A131YYA7	Leucyl-tRNA synthetase OS=Rhipicephalus appendiculatus PE=4 SV=1 - [A0A131YYA7_RHIAP]	1192	134.135	6.93213	1	2	2	6	0	0	0	0	2.00688	1.17	1	1	0	0	0	0	0	0	0	0	0	0	0	0	0	0	0	0	0	0	0	0	4.30304	1.17	1	2	0	0	0	0	4.15156	1.17	1	2	2.05628
A0A131YW81	Polycomb protein SCMH1 OS=Rhipicephalus appendiculatus PE=4 SV=1 - [A0A131YW81_RHIAP]	718	78.2571	8.60205	9	2	3	5	2.16258	1.81	1	1	0	0	0	0	0	0	0	0	0	0	0	0	0	0	0	0	0	0	0	0	4.48752	4.46	2	2	0	0	0	0	0	0	0	0	2.09216	2.37	1	1	2.08853
A0A131YZX0	TNF receptor-associated factor 6 OS=Rhipicephalus appendiculatus PE=4 SV=1 - [A0A131YZX0_RHIAP]	327	36.0986	5.8208	1	2	2	5	2.52103	5.81	1	1	0	0	0	0	0	0	0	0	0	0	0	0	0	0	0	0	0	0	0	0	4.26856	4.28	1	2	0	0	0	0	0	0	0	0	2.50891	4.28	1	1	0
A0A023GN86	Putative pentatricopeptide repeat-containing protein OS=Amblyomma triste PE=2 SV=1 - [A0A023GN86_9ACAR]	539	59.8833	7.15186	1	1	2	3	2.7768	2.97	1	1	0	0	0	0	0	0	0	0	0	0	0	0	0	0	0	0	0	0	0	0	5.78972	6.49	2	2	0	0	0	0	0	0	0	0	0	0	0	0	0
A0A1E1X8J8	Putative ig-like protein (Fragment) OS=Amblyomma aureolatum PE=2 SV=1 - [A0A1E1X8J8_9ACAR]	948	100.857	6.22705	1	1	1	3	0	0	0	0	2.16802	1.48	1	1	0	0	0	0	0	0	0	0	0	0	0	0	0	0	0	0	0	0	0	0	4.02838	1.48	1	2	0	0	0	0	0	0	0	0	0
B7P4U5	Putative uncharacterized protein (Fragment) OS=Ixodes scapularis GN=IscW_ISCW016165 PE=4 SV=1 - [B7P4U5_IXOSC]	311	35.5057	7.95752	3	1	1	7	0	0	0	0	2.31537	3.54	1	1	0	0	0	0	0	0	0	0	0	0	0	0	0	0	0	0	2.51826	3.54	1	1	0	0	0	0	0	0	0	0	4.725	3.54	1	2	4.39121
A0A023GL25	Putative dead-box atp-dependent rna helicase OS=Amblyomma triste PE=2 SV=1 - [A0A023GL25_9ACAR]	505	56.0498	9.42236	5	1	2	6	2.05693	3.56	1	1	0	0	0	0	0	0	0	0	0	0	0	0	0	0	0	0	0	0	0	0	0	0	0	0	2.39342	1.78	1	1	0	0	0	0	5.21451	1.78	1	2	2.5163
A0A131YXA9	Klarsicht OS=Rhipicephalus appendiculatus PE=4 SV=1 - [A0A131YXA9_RHIAP]	1237	135.579	5.40186	5	1	2	6	2.01917	1.05	1	1	0	0	0	0	0	0	0	0	0	0	0	0	0	0	0	0	0	0	0	0	2.27865	1.54	1	1	0	0	0	0	0	0	0	0	2.01773	1.54	1	1	2.02164
isotig01715	chymotrypsin-like protein	277	30.2028	9.31982	1	4	4	6	0	0	0	0	0	0	0	0	2.18426	5.78	1	1	0	0	0	0	0	0	0	0	0	0	0	0	2.57325	4.69	1	1	0	0	0	0	0	0	0	0	6.32202	8.66	2	2	2.40103
A0A131Y4P3	Putative tick transposon (Fragment) OS=Ixodes ricinus PE=2 SV=1 - [A0A131Y4P3_IXORI]	415	47.1155	8.92432	1	1	1	5	0	0	0	0	0	0	0	0	2.10762	2.65	1	1	0	0	0	0	0	0	0	0	0	0	0	0	0	0	0	0	0	0	0	0	2.09325	2.65	1	1	0	0	0	0	4.29928
V5HBR1	Putative secreted protein (Fragment) OS=Ixodes ricinus PE=2 SV=1 - [V5HBR1_IXORI]	139	15.6491	9.27588	1	1	1	5	0	0	0	0	0	0	0	0	2.00744	7.91	1	1	0	0	0	0	0	0	0	0	0	0	0	0	0	0	0	0	2.01728	7.91	1	1	0	0	0	0	0	0	0	0	4.39775
V5IJR5	Putative mrna splicing protein cdc5 myb superfamily OS=Ixodes ricinus PE=2 SV=1 - [V5IJR5_IXORI]	805	91.4856	7.94287	2	1	2	7	0	0	0	0	2.19341	2.24	1	1	0	0	0	0	0	0	0	0	0	0	0	0	0	0	0	0	0	0	0	0	0	0	0	0	0	0	0	0	5.10531	1.74	1	2	4.95665
A0A131Y433	Putative calmodulin regulated spectrin-associated protein family member 2 (Fragment) OS=Ixodes ricinus PE=2 SV=1 - [A0A131Y433_IXORI]	1340	148.954	8.06006	3	2	2	5	0	0	0	0	0	0	0	0	2.10895	1.12	1	1	0	0	0	0	0	0	0	0	0	0	0	0	0	0	0	0	0	0	0	0	0	0	0	0	2.15907	1.12	1	1	2.00261
A0A1E1XIF9	Putative spectrin beta chain brain 4-like protein OS=Amblyomma aureolatum PE=2 SV=1 - [A0A1E1XIF9_9ACAR]	4039	464.065	6.45557	8	2	4	5	0	0	0	0	0	0	0	0	2.07062	0.42	1	1	0	0	0	0	0	0	0	0	0	0	0	0	0	0	0	0	0	0	0	0	0	0	0	0	2.10823	0.25	1	1	6.45721
A0A131XBZ3	Putative microtubule-actin cross-linking factor 1-like protein (Fragment) OS=Hyalomma excavatum PE=2 SV=1 - [A0A131XBZ3_9ACAR]	2866	311.424	8.06006	1	4	4	4	2.09626	0.49	1	1	0	0	0	0	0	0	0	0	0	0	0	0	0	0	0	0	0	0	0	0	0	0	0	0	0	0	0	0	0	0	0	0	5.13426	1.05	2	2	0
L7MGD6	Putative mucin 68d (Fragment) OS=Rhipicephalus pulchellus PE=2 SV=1 - [L7MGD6_9ACAR]	1027	109.775	5.05908	5	2	2	4	0	0	0	0	0	0	0	0	2.07463	1.56	1	1	0	0	0	0	0	0	0	0	0	0	0	0	0	0	0	0	0	0	0	0	0	0	0	0	4.44927	1.27	1	2	2.24978
A0A023FS86	Putative lipocalin-2 1 OS=Amblyomma cajennense PE=2 SV=1 - [A0A023FS86_9ACAR]	222	25.2448	5.18604	1	2	2	3	2.13878	4.5	1	1	0	0	0	0	0	0	0	0	0	0	0	0	0	0	0	0	0	0	0	0	0	0	0	0	0	0	0	0	0	0	0	0	0	0	0	0	2.25114
A0A147BRL1	Uncharacterized protein (Fragment) OS=Ixodes ricinus PE=4 SV=1 - [A0A147BRL1_IXORI]	684	78.0147	6.66846	2	1	2	3	2.05964	1.9	1	1	0	0	0	0	0	0	0	0	0	0	0	0	0	0	0	0	0	0	0	0	0	0	0	0	0	0	0	0	0	0	0	0	0	0	0	0	0
A0A1E1XGU7	Putative trna and rrna cytosine-c5-methylase nucleolar protein nol1/nop2 OS=Amblyomma aureolatum PE=2 SV=1 - [A0A1E1XGU7_9ACAR]	690	77.337	9.34912	2	3	3	3	2.1143	2.17	1	1	0	0	0	0	0	0	0	0	0	0	0	0	0	0	0	0	0	0	0	0	0	0	0	0	0	0	0	0	0	0	0	0	0	0	0	0	0
L7LV79	Putative myosin class ii heavy chain OS=Rhipicephalus pulchellus PE=2 SV=1 - [L7LV79_9ACAR]	978	107.334	5.2876	2	2	3	3	2.01151	1.33	1	1	0	0	0	0	0	0	0	0	0	0	0	0	0	0	0	0	0	0	0	0	0	0	0	0	0	0	0	0	0	0	0	0	0	0	0	0	0
A0A131Z0K4	Euchromatic histone-lysine N-methyltransferase OS=Rhipicephalus appendiculatus PE=4 SV=1 - [A0A131Z0K4_RHIAP]	501	56.4353	5.57959	2	1	1	7	0	0	0	0	0	0	0	0	0	0	0	0	10.8713	2.59	1	5	4.4003	2.59	1	2	0	0	0	0	0	0	0	0	0	0	0	0	0	0	0	0	0	0	0	0	0
A0A0K8RJD9	Putative acetyl-coa acetyltransferase OS=Ixodes ricinus PE=2 SV=1 - [A0A0K8RJD9_IXORI]	398	42.2816	8.14795	2	1	1	6	0	0	0	0	0	0	0	0	0	0	0	0	5.50528	3.27	1	4	2.4885	3.27	1	2	0	0	0	0	0	0	0	0	0	0	0	0	0	0	0	0	0	0	0	0	0
A0A131YV92	HEAT repeat-containing protein OS=Rhipicephalus appendiculatus PE=4 SV=1 - [A0A131YV92_RHIAP]	2974	332.681	6.16357	2	2	2	6	0	0	0	0	0	0	0	0	0	0	0	0	4.23389	0.44	1	2	6.32938	0.81	2	3	2.27683	0.44	1	1	0	0	0	0	0	0	0	0	0	0	0	0	0	0	0	0	0
A0A1E1X5A2	Alpha-1,4 glucan phosphorylase (Fragment) OS=Amblyomma aureolatum PE=2 SV=1 - [A0A1E1X5A2_9ACAR]	851	97.696	7.1665	1	0	4	19	0	0	0	0	0	0	0	0	0	0	0	0	5.07749	2.59	2	2	4.87867	1.18	1	2	2.21441	1.18	1	1	6.53584	3.06	2	2	10.8832	2.12	2	4	3.23504	1.18	1	1	7.67914	4	3	3	2.03924
A0A023FNG7	Alpha-1,4 glucan phosphorylase (Fragment) OS=Amblyomma cajennense PE=2 SV=1 - [A0A023FNG7_9ACAR]	548	62.5444	7.1958	2	1	4	16	0	0	0	0	0	0	0	0	0	0	0	0	5.07749	4.01	2	2	4.87867	1.82	1	2	2.21441	1.82	1	1	6.53584	4.74	2	2	8.84906	1.82	1	3	3.23504	1.82	1	1	5.39187	4.74	2	2	2.28193
A0A147BCV4	Uncharacterized protein (Fragment) OS=Ixodes ricinus PE=4 SV=1 - [A0A147BCV4_IXORI]	599	67.2953	9.75928	1	1	1	10	0	0	0	0	0	0	0	0	0	0	0	0	4.39936	2	1	2	2.35049	2	1	1	4.43098	2	1	2	0	0	0	0	2.03321	2	1	1	4.347	2	1	2	4.88914	2	1	2	0
A0A131Z019	ATP-dependent DNA helicase II subunit 2 OS=Rhipicephalus appendiculatus PE=3 SV=1 - [A0A131Z019_RHIAP]	704	77.9894	5.22412	7	1	3	5	0	0	0	0	0	0	0	0	0	0	0	0	6.97861	3.98	2	3	2.19702	2.56	1	1	2.12071	2.56	1	1	0	0	0	0	0	0	0	0	0	0	0	0	0	0	0	0	0
A6N9Z1	Dual kunitz salivary protein OS=Ornithodoros parkeri PE=2 SV=1 - [A6N9Z1_ORNPR]	158	18.1039	9.17334	1	1	1	5	0	0	0	0	0	0	0	0	0	0	0	0	6.23471	10.13	1	4	2.01341	10.13	1	1	0	0	0	0	0	0	0	0	0	0	0	0	0	0	0	0	0	0	0	0	0
A0A131Z1A9	Phosphoribosylformylglycinamidine synthase OS=Rhipicephalus appendiculatus PE=3 SV=1 - [A0A131Z1A9_RHIAP]	1323	143.898	6.22705	4	2	3	12	0	0	0	0	0	0	0	0	0	0	0	0	3.72643	1.36	1	1	4.36195	2.12	2	2	2.2916	1.13	1	1	5.9454	2.49	2	2	0	0	0	0	3.1534	1.36	1	1	4.61664	1.36	1	1	7.08464
isotig10453	cathepsin l-like	322	35.1315	4.729	2	2	2	8	0	0	0	0	0	0	0	0	0	0	0	0	7.313	4.35	1	2	2.77405	4.35	1	1	3.8007	4.35	1	1	7.11672	4.35	1	2	0	0	0	0	0	0	0	0	6.13352	9.63	2	2	0
A0A147BLM9	Putative tick transposon (Fragment) OS=Ixodes ricinus PE=4 SV=1 - [A0A147BLM9_IXORI]	792	89.6463	9.26123	2	1	2	7	0	0	0	0	0	0	0	0	0	0	0	0	2.20237	1.01	1	1	6.21107	2.65	2	3	0	0	0	0	0	0	0	0	2.01193	1.01	1	1	2.1687	1.01	1	1	0	0	0	0	0
isotig19520	legumain-like protease precursor	443	50.0039	6.58057	2	3	3	12	0	0	0	0	0	0	0	0	0	0	0	0	2.24816	2.48	1	1	2.43287	2.48	1	1	4.62919	4.97	2	2	3.07034	3.16	1	1	0	0	0	0	0	0	0	0	14.1286	5.64	2	4	4.03466
L7M960	Putative proteasome prosome macropain activator subunit 4 strongylocentrotus purpuratus OS=Rhipicephalus pulchellus PE=2 SV=1 - [L7M960_9ACAR]	1831	208.448	6.82959	3	1	2	7	0	0	0	0	0	0	0	0	0	0	0	0	4.55269	1.47	2	2	0	0	0	0	4.78916	0.6	1	2	0	0	0	0	2.68397	0.6	1	1	0	0	0	0	0	0	0	0	0
A0A1E1XR19	Protein required for s-phase initiation or completion (Fragment) OS=Amblyomma sculptum PE=2 SV=1 - [A0A1E1XR19_9ACAR]	807	89.3024	9.08545	1	4	4	6	0	0	0	0	0	0	0	0	0	0	0	0	2.17725	1.61	1	1	2.0497	1.61	1	1	4.22057	3.1	2	2	0	0	0	0	0	0	0	0	2.19115	1.86	1	1	2.00771	1.61	1	1	0
isotig21565	cathepsin l-like	335	36.562	6.43018	1	1	1	6	0	0	0	0	0	0	0	0	0	0	0	0	6.65458	4.18	1	2	3.07925	4.18	1	1	2.55302	4.18	1	1	0	0	0	0	0	0	0	0	0	0	0	0	3.12562	4.18	1	1	0
A0A023FXK5	Uncharacterized protein (Fragment) OS=Amblyomma parvum PE=2 SV=1 - [A0A023FXK5_9ACAR]	146	16.6029	9.37842	1	1	1	4	0	0	0	0	0	0	0	0	0	0	0	0	2.16887	8.22	1	1	4.48531	8.22	1	2	2.19067	8.22	1	1	0	0	0	0	0	0	0	0	0	0	0	0	0	0	0	0	0
A0A090XA71	Putative uridylate kinase/adenylate kinase (Fragment) OS=Ixodes ricinus PE=2 SV=1 - [A0A090XA71_IXORI]	180	20.1605	9.40771	1	1	1	4	0	0	0	0	0	0	0	0	0	0	0	0	2.00254	6.67	1	1	4.0195	6.67	1	2	2.07909	6.67	1	1	0	0	0	0	0	0	0	0	0	0	0	0	0	0	0	0	0
A0A131XGG0	Vacuolar-sorting protein SNF8 OS=Hyalomma excavatum PE=2 SV=1 - [A0A131XGG0_9ACAR]	243	27.4402	8.79248	3	1	1	4	0	0	0	0	0	0	0	0	0	0	0	0	2.03547	5.35	1	1	4.67529	5.35	1	2	2.53598	5.35	1	1	0	0	0	0	0	0	0	0	0	0	0	0	0	0	0	0	0
A0A131YRP9	Pancreatic trypsin inhibitor OS=Rhipicephalus appendiculatus PE=4 SV=1 - [A0A131YRP9_RHIAP]	102	11.2295	8.71924	1	1	1	4	0	0	0	0	0	0	0	0	0	0	0	0	4.90575	15.69	1	2	2.17543	15.69	1	1	2.09355	15.69	1	1	0	0	0	0	0	0	0	0	0	0	0	0	0	0	0	0	0
A0A147BIE4	Putative gypsy-16-i hm (Fragment) OS=Ixodes ricinus PE=4 SV=1 - [A0A147BIE4_IXORI]	1332	150.626	9.0415	1	3	3	4	0	0	0	0	0	0	0	0	0	0	0	0	2.0601	0.9	1	1	4.45534	1.13	1	2	2.09436	1.13	1	1	0	0	0	0	0	0	0	0	0	0	0	0	0	0	0	0	0
A0A147BMD4	Putative tick transposon (Fragment) OS=Ixodes ricinus PE=4 SV=1 - [A0A147BMD4_IXORI]	1130	130.407	8.646	1	1	2	4	0	0	0	0	0	0	0	0	0	0	0	0	4.23101	0.88	1	2	4.21113	2.12	2	2	0	0	0	0	0	0	0	0	0	0	0	0	0	0	0	0	0	0	0	0	0
isotig21611	cytotoxin-like protein	269	30.2309	9.1001	1	7	7	34	0	0	0	0	0	0	0	0	0	0	0	0	7.1496	9.29	2	2	0	0	0	0	4.35278	5.95	1	1	14.7607	21.19	5	5	10.9347	12.64	3	4	16.1694	15.24	4	6	22.1766	24.91	6	7	15.327
isotig10223	plasma alpha-l-fucosidase	397	45.8403	5.24951	2	6	7	20	0	0	0	0	0	0	0	0	0	0	0	0	2.01156	2.02	1	1	0	0	0	0	4.13992	4.28	2	2	2.38787	2.77	1	1	7.18656	4.79	2	3	14.8261	7.3	4	6	2.74527	2.77	1	1	0
A0A023GNF0	Putative aldehyde dehydrogenase (Fragment) OS=Amblyomma triste PE=2 SV=1 - [A0A023GNF0_9ACAR]	538	58.0266	7.12256	10	1	3	14	0	0	0	0	0	0	0	0	0	0	0	0	2.2707	1.67	1	1	2.0724	1.67	1	1	2.3719	1.67	1	1	5.96843	5.02	2	2	5.65308	2.42	1	2	5.73635	2.42	1	2	3.47174	2.42	1	1	3.23075
A0A023G5U4	Uncharacterized protein OS=Amblyomma triste PE=2 SV=1 - [A0A023G5U4_9ACAR]	149	16.1703	8.5874	2	1	1	12	0	0	0	0	0	0	0	0	0	0	0	0	4.05082	7.38	1	2	0	0	0	0	2.10739	7.38	1	1	4.60205	7.38	1	2	7.74102	7.38	1	3	2.99409	7.38	1	1	2.52534	7.38	1	1	2.42992
A0A1E1X997	Putative phosphoribosylformylglycinamidine synthase OS=Amblyomma aureolatum PE=2 SV=1 - [A0A1E1X997_9ACAR]	1324	143.623	5.99854	5	2	3	10	0	0	0	0	0	0	0	0	0	0	0	0	3.72643	1.36	1	1	0	0	0	0	4.73386	0.76	1	2	5.84468	2.49	2	2	0	0	0	0	3.1534	1.36	1	1	4.61664	1.36	1	1	4.72866
A0A0K8RBV9	Putative metalloprotease OS=Ixodes ricinus PE=2 SV=1 - [A0A0K8RBV9_IXORI]	490	54.652	8.86572	1	1	1	9	0	0	0	0	0	0	0	0	0	0	0	0	2.07763	2.86	1	1	2.04223	2.86	1	1	2.07547	2.86	1	1	2.12624	2.86	1	1	0	0	0	0	4.43826	2.86	1	2	2.11005	2.86	1	1	2.44232
A0A131Z894	Large subunit ribosomal protein LP0 (Fragment) OS=Rhipicephalus appendiculatus PE=4 SV=1 - [A0A131Z894_RHIAP]	169	18.9583	9.72998	22	2	2	9	0	0	0	0	0	0	0	0	0	0	0	0	2.13403	5.33	1	1	2.40711	5.33	1	1	2.03631	5.33	1	1	2.28199	5.33	1	1	0	0	0	0	2.40596	5.33	1	1	2.42201	5.33	1	1	6.24805
isotig05018|---NA---	isotig05018|---NA---	132	14.7507	9.40771	1	1	1	6	0	0	0	0	0	0	0	0	0	0	0	0	4.47476	9.09	1	2	2.32538	9.09	1	1	0	0	0	0	0	0	0	0	2.07461	9.09	1	1	2.5609	9.09	1	1	0	0	0	0	2.10724
A0A131YX38	Serine hydrolase like 2 OS=Rhipicephalus appendiculatus PE=4 SV=1 - [A0A131YX38_RHIAP]	334	37.6043	8.82178	1	1	1	5	0	0	0	0	0	0	0	0	0	0	0	0	4.23445	3.89	1	2	2.22571	3.89	1	1	0	0	0	0	2.30344	3.89	1	1	0	0	0	0	2.29246	3.89	1	1	0	0	0	0	0
B7P9N6	Putative uncharacterized protein OS=Ixodes scapularis GN=IscW_ISCW001912 PE=4 SV=1 - [B7P9N6_IXOSC]	499	56.7039	9.62744	1	1	1	5	0	0	0	0	0	0	0	0	0	0	0	0	2.02805	2.81	1	1	2.06714	2.81	1	1	2.38656	2.81	1	1	4.40629	2.81	1	2	0	0	0	0	0	0	0	0	0	0	0	0	0
B7PG46	Gamma glutamyl transpeptidase, putative (Fragment) OS=Ixodes scapularis GN=IscW_ISCW003588 PE=4 SV=1 - [B7PG46_IXOSC]	167	17.449	8.96826	1	1	1	5	0	0	0	0	0	0	0	0	0	0	0	0	0	0	0	0	2.11875	7.78	1	2	2.03892	7.78	1	1	2.19955	7.78	1	2	0	0	0	0	0	0	0	0	0	0	0	0	0
V5GYC2	Putative gtp-binding protein drg2 odn superfamily OS=Ixodes ricinus PE=2 SV=1 - [V5GYC2_IXORI]	367	40.824	8.89502	17	4	4	7	0	0	0	0	0	0	0	0	0	0	0	0	5.16242	8.17	2	2	0	0	0	0	2.063	4.63	1	1	2.71864	3	1	1	0	0	0	0	0	0	0	0	5.94773	6.81	2	2	0
B7Q5X4	Putative uncharacterized protein OS=Ixodes scapularis GN=IscW_ISCW021447 PE=4 SV=1 - [B7Q5X4_IXOSC]	931	100.129	5.49072	1	1	1	5	0	0	0	0	0	0	0	0	0	0	0	0	4.62295	1.83	1	2	2.00613	1.83	1	1	0	0	0	0	2.4676	1.83	1	1	0	0	0	0	0	0	0	0	0	0	0	0	2.06676
A0A0K8R8B8	Putative transforming growth factor beta induced OS=Ixodes ricinus PE=2 SV=1 - [A0A0K8R8B8_IXORI]	800	87.6864	5.41455	2	3	3	4	0	0	0	0	0	0	0	0	0	0	0	0	2.18942	1.75	1	1	4.13165	1.63	1	2	0	0	0	0	2.20973	2.13	1	1	0	0	0	0	0	0	0	0	0	0	0	0	0
A0A131XRG3	Putative ankyrin repeat and fyve domain-containing protein 1 OS=Ixodes ricinus PE=2 SV=1 - [A0A131XRG3_IXORI]	1138	124.35	6.17627	3	2	3	4	0	0	0	0	0	0	0	0	0	0	0	0	0	0	0	0	4.24798	2.46	2	2	2.15518	1.67	1	1	2.06079	1.14	1	1	0	0	0	0	0	0	0	0	0	0	0	0	0
A0A147BSV5	Uncharacterized protein (Fragment) OS=Ixodes ricinus PE=4 SV=1 - [A0A147BSV5_IXORI]	358	41.036	9.67139	2	1	2	4	0	0	0	0	0	0	0	0	0	0	0	0	4.43155	4.47	1	2	0	0	0	0	2.02515	4.47	1	1	2.18038	4.47	1	1	0	0	0	0	0	0	0	0	0	0	0	0	0
A0A1E1X8G5	Putative vigilin OS=Amblyomma aureolatum PE=2 SV=1 - [A0A1E1X8G5_9ACAR]	1275	143.18	6.48096	5	2	3	4	0	0	0	0	0	0	0	0	0	0	0	0	2.26574	1.18	1	1	4.67734	1.25	1	2	0	0	0	0	0	0	0	0	0	0	0	0	2.04674	0.94	1	1	0	0	0	0	0
A0A1E1X332	Putative cytochrome (Fragment) OS=Amblyomma aureolatum PE=2 SV=1 - [A0A1E1X332_9ACAR]	324	37.2299	6.41748	1	2	2	5	0	0	0	0	0	0	0	0	0	0	0	0	0	0	0	0	4.14268	8.02	2	2	2.00455	3.4	1	1	0	0	0	0	0	0	0	0	0	0	0	0	0	0	0	0	2.1672
A0A131XJ72	DNA primase OS=Hyalomma excavatum PE=2 SV=1 - [A0A131XJ72_9ACAR]	410	46.8326	7.60596	3	1	1	4	0	0	0	0	0	0	0	0	0	0	0	0	2.18292	2.93	1	1	4.23112	2.93	1	2	0	0	0	0	0	0	0	0	0	0	0	0	0	0	0	0	2.03982	2.93	1	1	0
A0A147BI14	Putative nadp-dependent flavoprotein reductase (Fragment) OS=Ixodes ricinus PE=4 SV=1 - [A0A147BI14_IXORI]	710	78.7318	6.26514	1	1	1	4	0	0	0	0	0	0	0	0	0	0	0	0	4.16216	1.97	1	2	0	0	0	0	2.01184	1.97	1	1	0	0	0	0	0	0	0	0	0	0	0	0	2.028	1.97	1	1	0
A0A1S4LD53	Uncharacterized protein OS=Ixodes scapularis GN=8039211 PE=4 SV=1 - [A0A1S4LD53_IXOSC]	58	7.03469	10.2427	2	2	2	4	0	0	0	0	0	0	0	0	0	0	0	0	2.14535	17.24	1	1	4.09092	36.21	2	2	0	0	0	0	0	0	0	0	0	0	0	0	0	0	0	0	2.11328	17.24	1	1	0
G3MNR8	Uncharacterized protein OS=Amblyomma maculatum PE=2 SV=1 - [G3MNR8_9ACAR]	267	28.7626	6.85889	1	1	1	4	0	0	0	0	0	0	0	0	0	0	0	0	0	0	0	0	2.18152	5.62	1	1	4.56598	5.62	1	2	0	0	0	0	0	0	0	0	0	0	0	0	2.2404	5.62	1	1	0
G9NSEKQ02HUASG|---NA---	G9NSEKQ02HUASG|---NA---	75	8.53914	5.0083	1	1	1	4	0	0	0	0	0	0	0	0	0	0	0	0	4.07268	10.67	1	2	0	0	0	0	2.1395	10.67	1	1	0	0	0	0	0	0	0	0	0	0	0	0	0	0	0	0	2.20088
A0A023G7X0	Putative sec5 subunit of exocyst complex (Fragment) OS=Amblyomma triste PE=2 SV=1 - [A0A023G7X0_9ACAR]	609	68.7284	7.00537	3	1	1	3	0	0	0	0	0	0	0	0	0	0	0	0	0	0	0	0	4.83844	1.48	1	2	2.32416	1.48	1	1	0	0	0	0	0	0	0	0	0	0	0	0	0	0	0	0	0
A0A023GNS8	Putative carnitine o-acyltransferase cpti OS=Amblyomma triste PE=2 SV=1 - [A0A023GNS8_9ACAR]	769	87.946	8.83643	11	2	2	3	0	0	0	0	0	0	0	0	0	0	0	0	2.30447	1.04	1	1	0	0	0	0	4.05699	2.08	2	2	0	0	0	0	0	0	0	0	0	0	0	0	0	0	0	0	0
A0A0C9S2W1	Putative alanine aminotransferase (Fragment) OS=Amblyomma americanum PE=2 SV=1 - [A0A0C9S2W1_AMBAM]	415	45.8301	7.25439	2	1	1	3	0	0	0	0	0	0	0	0	0	0	0	0	4.29599	3.86	1	2	2.31366	3.86	1	1	0	0	0	0	0	0	0	0	0	0	0	0	0	0	0	0	0	0	0	0	0
A0A0C9SF23	Putative bpti/kunitz family of serine protease inhibitor OS=Amblyomma americanum PE=2 SV=1 - [A0A0C9SF23_AMBAM]	146	17.0191	8.89502	1	1	1	3	0	0	0	0	0	0	0	0	0	0	0	0	0	0	0	0	4.10158	5.48	1	2	2.04711	5.48	1	1	0	0	0	0	0	0	0	0	0	0	0	0	0	0	0	0	0
A0A131Y1T1	Putative tick transposon (Fragment) OS=Ixodes ricinus PE=2 SV=1 - [A0A131Y1T1_IXORI]	1075	123.38	8.51416	2	3	3	3	0	0	0	0	0	0	0	0	0	0	0	0	0	0	0	0	0	0	0	0	6.59757	3.63	3	3	0	0	0	0	0	0	0	0	0	0	0	0	0	0	0	0	0
A0A131YJG1	Uncharacterized protein OS=Rhipicephalus appendiculatus PE=4 SV=1 - [A0A131YJG1_RHIAP]	209	23.1963	7.25439	1	1	1	3	0	0	0	0	0	0	0	0	0	0	0	0	4.70401	7.18	1	2	2.238	7.18	1	1	0	0	0	0	0	0	0	0	0	0	0	0	0	0	0	0	0	0	0	0	0
A0A131YNL3	Translation initiation factor eIF-2B subunit beta OS=Rhipicephalus appendiculatus PE=3 SV=1 - [A0A131YNL3_RHIAP]	320	34.3299	5.52881	2	1	1	3	0	0	0	0	0	0	0	0	0	0	0	0	2.05489	5	1	1	4.05602	5	1	2	0	0	0	0	0	0	0	0	0	0	0	0	0	0	0	0	0	0	0	0	0
A0A131ZBR1	Uncharacterized protein (Fragment) OS=Rhipicephalus appendiculatus PE=4 SV=1 - [A0A131ZBR1_RHIAP]	460	50.4547	8.11865	1	1	1	3	0	0	0	0	0	0	0	0	0	0	0	0	4.40004	3.7	1	2	0	0	0	0	2.28257	3.7	1	1	0	0	0	0	0	0	0	0	0	0	0	0	0	0	0	0	0
A0A147BJ88	Putative secreted protein OS=Ixodes ricinus PE=4 SV=1 - [A0A147BJ88_IXORI]	69	7.48349	7.6499	1	1	1	3	0	0	0	0	0	0	0	0	0	0	0	0	4.12762	24.64	1	2	2.01779	24.64	1	1	0	0	0	0	0	0	0	0	0	0	0	0	0	0	0	0	0	0	0	0	0
A0A147BVY6	Putative secreted metalloprotease OS=Ixodes ricinus PE=4 SV=1 - [A0A147BVY6_IXORI]	289	32.3789	6.68311	2	1	1	3	0	0	0	0	0	0	0	0	0	0	0	0	2.32291	4.84	1	1	2.31607	4.84	1	2	0	0	0	0	0	0	0	0	0	0	0	0	0	0	0	0	0	0	0	0	0
A0A1E1X920	Putative cytochrome OS=Amblyomma aureolatum PE=2 SV=1 - [A0A1E1X920_9ACAR]	252	27.8828	9.05615	1	1	1	3	0	0	0	0	0	0	0	0	0	0	0	0	4.26457	5.95	1	2	2.49582	5.95	1	1	0	0	0	0	0	0	0	0	0	0	0	0	0	0	0	0	0	0	0	0	0
A0A1E1XDM1	Putative actin-binding protein anillin (Fragment) OS=Amblyomma aureolatum PE=2 SV=1 - [A0A1E1XDM1_9ACAR]	531	58.8677	7.15186	1	1	1	3	0	0	0	0	0	0	0	0	0	0	0	0	4.26238	2.64	1	2	2.27993	2.64	1	1	0	0	0	0	0	0	0	0	0	0	0	0	0	0	0	0	0	0	0	0	0
B7P2E9	Protocadherin-16, putative OS=Ixodes scapularis GN=IscW_ISCW000378 PE=4 SV=1 - [B7P2E9_IXOSC]	2493	270.485	5.14795	1	1	1	3	0	0	0	0	0	0	0	0	0	0	0	0	2.31717	0.52	1	1	4.57503	0.52	1	2	0	0	0	0	0	0	0	0	0	0	0	0	0	0	0	0	0	0	0	0	0
E5D588	Av86 protein OS=Amblyomma variegatum PE=2 SV=1 - [E5D588_AMBVA]	650	72.0818	5.93506	1	1	1	3	0	0	0	0	0	0	0	0	0	0	0	0	4.51429	2.31	1	2	2.23207	2.31	1	1	0	0	0	0	0	0	0	0	0	0	0	0	0	0	0	0	0	0	0	0	0
G3MJ06	Uncharacterized protein (Fragment) OS=Amblyomma maculatum PE=2 SV=1 - [G3MJ06_9ACAR]	542	62.4906	7.40088	1	1	1	3	0	0	0	0	0	0	0	0	0	0	0	0	6.08534	2.4	1	3	0	0	0	0	0	0	0	0	0	0	0	0	0	0	0	0	0	0	0	0	0	0	0	0	0
G3MLP6	Uncharacterized protein OS=Amblyomma maculatum PE=2 SV=1 - [G3MLP6_9ACAR]	614	69.5088	8.17725	6	2	3	3	0	0	0	0	0	0	0	0	0	0	0	0	0	0	0	0	2.04514	2.12	1	1	4.43634	3.58	2	2	0	0	0	0	0	0	0	0	0	0	0	0	0	0	0	0	0
G9NSEKQ02HBITR	cad trifunctional partial	106	12.0068	4.75439	1	1	1	3	0	0	0	0	0	0	0	0	0	0	0	0	3.42516	14.15	1	1	6.6559	14.15	1	2	0	0	0	0	0	0	0	0	0	0	0	0	0	0	0	0	0	0	0	0	0
L7M3M3	Putative puromycin-sensitive aminopeptidase OS=Rhipicephalus pulchellus PE=2 SV=1 - [L7M3M3_9ACAR]	773	88.6863	6.354	4	1	1	3	0	0	0	0	0	0	0	0	0	0	0	0	2.19233	1.55	1	1	0	0	0	0	4.50314	1.55	1	2	0	0	0	0	0	0	0	0	0	0	0	0	0	0	0	0	0
L7MH42	Putative atp-dependent rna helicase (Fragment) OS=Rhipicephalus pulchellus PE=2 SV=1 - [L7MH42_9ACAR]	477	52.7977	9.78857	1	1	1	3	0	0	0	0	0	0	0	0	0	0	0	0	0	0	0	0	4.45755	3.56	1	2	2.28679	3.56	1	1	0	0	0	0	0	0	0	0	0	0	0	0	0	0	0	0	0
V5HDN7	Peptidylprolyl isomerase OS=Ixodes ricinus PE=2 SV=1 - [V5HDN7_IXORI]	211	23.6852	7.41553	1	1	1	3	0	0	0	0	0	0	0	0	0	0	0	0	4.21111	8.53	1	2	2.16679	8.53	1	1	0	0	0	0	0	0	0	0	0	0	0	0	0	0	0	0	0	0	0	0	0
A0A090XDU4	Putative ankyrin death domain protein (Fragment) OS=Ixodes ricinus PE=2 SV=1 - [A0A090XDU4_IXORI]	1728	187.765	6.81494	15	1	2	9	0	0	0	0	0	0	0	0	0	0	0	0	2.84861	0.69	1	1	2.86828	0.69	1	1	0	0	0	0	3.12966	0.69	1	1	5.81421	0.69	1	2	6.306	0.69	1	2	3.15386	0.69	1	1	2.11526
A0A0K8RME5	GMP reductase OS=Ixodes ricinus PE=2 SV=1 - [A0A0K8RME5_IXORI]	365	39.6879	7.63525	2	1	1	9	0	0	0	0	0	0	0	0	0	0	0	0	0	0	0	0	2.00136	3.56	1	1	2.07456	3.56	1	1	2.27787	3.56	1	1	0	0	0	0	8.67548	3.56	1	4	0	0	0	0	2.23176
isotig20790	geranylgeranyl pyrophosphate synthase-like	420	47.2638	6.26514	7	1	2	8	0	0	0	0	0	0	0	0	0	0	0	0	0	0	0	0	5.0888	3.1	1	2	0	0	0	0	8.77929	5.48	2	3	0	0	0	0	3.29128	3.1	1	1	2.99004	2.38	1	1	0
isotig06474	acid ceramidase	294	33.2903	5.96045	1	1	1	8	0	0	0	0	0	0	0	0	0	0	0	0	2.62336	5.1	1	1	0	0	0	0	2.20754	5.1	1	1	0	0	0	0	0	0	0	0	10.2123	5.1	1	3	3.67023	5.1	1	1	3.2867
isotig18462	gamma-glutamyl hydrolase	357	39.175	7.07861	1	3	3	7	0	0	0	0	0	0	0	0	0	0	0	0	2.44091	2.8	1	1	2.40741	2.24	1	1	0	0	0	0	2.39111	2.24	1	1	2.27519	2.24	1	1	2.29442	2.24	1	1	0	0	0	0	0
A0A131YI65	Uncharacterized protein OS=Rhipicephalus appendiculatus PE=4 SV=1 - [A0A131YI65_RHIAP]	118	13.0435	5.21143	1	1	1	5	0	0	0	0	0	0	0	0	0	0	0	0	2.34544	9.32	1	1	2.00618	9.32	1	1	0	0	0	0	0	0	0	0	2.03675	9.32	1	1	4.30511	9.32	1	2	0	0	0	0	0
isotig07685	secreted salivary gland	228	24.9124	7.66455	1	1	1	5	0	0	0	0	0	0	0	0	0	0	0	0	0	0	0	0	2.37481	6.14	1	1	2.01207	6.14	1	1	4.39714	6.14	1	2	0	0	0	0	2.53079	6.14	1	1	0	0	0	0	0
isotig10056	trans- -enoyl- reductase-like	303	33.989	9.64209	1	1	1	8	0	0	0	0	0	0	0	0	0	0	0	0	3.34776	4.62	1	1	3.377	4.62	1	1	0	0	0	0	0	0	0	0	2.89074	4.62	1	1	3.22079	4.62	1	1	2.92846	4.62	1	1	6.18809
A0A023FXK9	Putative aldehyde dehydrogenase OS=Amblyomma parvum PE=2 SV=1 - [A0A023FXK9_9ACAR]	519	56.2427	6.17627	7	2	3	7	0	0	0	0	0	0	0	0	0	0	0	0	0	0	0	0	0	0	0	0	4.17209	4.62	2	2	0	0	0	0	0	0	0	0	4.35042	4.62	2	2	2.06091	1.54	1	1	4.06719
isotig27441	isoform c	219	24.247	8.08936	1	1	1	6	0	0	0	0	0	0	0	0	0	0	0	0	2.51522	6.85	1	1	0	0	0	0	4.18448	6.85	1	1	7.2426	6.85	1	2	0	0	0	0	0	0	0	0	2.91831	6.85	1	1	0
A0A131XM96	Putative structural maintenance of chromosome protein 2 chromosome condensation complex condensin (Fragment) OS=Hyalomma excavatum PE=2 SV=1 - [A0A131XM96_9ACAR]	1307	148.002	6.1001	1	1	3	5	0	0	0	0	0	0	0	0	0	0	0	0	0	0	0	0	2.10791	0.92	1	1	2.27016	0.99	1	1	4.43353	1.76	2	2	0	0	0	0	0	0	0	0	0	0	0	0	2.17041
A0A131YL31	Mucin OS=Rhipicephalus appendiculatus PE=4 SV=1 - [A0A131YL31_RHIAP]	1344	144.956	4.4624	4	3	3	5	0	0	0	0	0	0	0	0	0	0	0	0	4.82916	2.31	2	2	0	0	0	0	0	0	0	0	2.31814	1.04	1	1	2.14578	1.04	1	1	0	0	0	0	0	0	0	0	0
A0A023FKF5	Putative dihydropyrimidine dehydrogenase (Fragment) OS=Amblyomma cajennense PE=2 SV=1 - [A0A023FKF5_9ACAR]	490	52.6937	6.44287	10	1	1	4	0	0	0	0	0	0	0	0	0	0	0	0	4.85802	1.84	1	2	0	0	0	0	0	0	0	0	0	0	0	0	4.31058	1.84	1	2	0	0	0	0	0	0	0	0	0
A0A023GE79	Palmitoyltransferase OS=Amblyomma triste PE=2 SV=1 - [A0A023GE79_9ACAR]	467	51.0124	9.5542	1	1	1	4	0	0	0	0	0	0	0	0	0	0	0	0	2.12158	2.57	1	1	0	0	0	0	2.38132	2.57	1	1	4.40707	2.57	1	2	0	0	0	0	0	0	0	0	0	0	0	0	0
A0A147BBU7	Putative secreted protein OS=Ixodes ricinus PE=4 SV=1 - [A0A147BBU7_IXORI]	213	23.1935	5.63037	1	2	2	4	0	0	0	0	0	0	0	0	0	0	0	0	4.67606	14.55	2	2	0	0	0	0	0	0	0	0	4.45837	7.51	1	2	0	0	0	0	0	0	0	0	0	0	0	0	0
A0A1E1XCW2	Putative peptidase family c50 (Fragment) OS=Amblyomma aureolatum PE=2 SV=1 - [A0A1E1XCW2_9ACAR]	1767	197.597	7.06396	1	1	2	4	0	0	0	0	0	0	0	0	0	0	0	0	0	0	0	0	2.0295	0.79	1	1	2.16847	0.79	1	1	4.35204	0.62	1	2	0	0	0	0	0	0	0	0	0	0	0	0	0
B7PPY8	Putative uncharacterized protein (Fragment) OS=Ixodes scapularis GN=IscW_ISCW006057 PE=4 SV=1 - [B7PPY8_IXOSC]	1347	141.349	7.76709	2	2	2	4	0	0	0	0	0	0	0	0	0	0	0	0	0	0	0	0	2.12969	1.11	1	1	2.08517	1.11	1	1	4.16433	1.04	1	2	0	0	0	0	0	0	0	0	0	0	0	0	0
B7P3G6	Medium-chain acyl-CoA dehydrogenase, putative OS=Ixodes scapularis GN=IscW_ISCW001274 PE=3 SV=1 - [B7P3G6_IXOSC]	275	29.0676	6.55127	1	1	1	6	0	0	0	0	0	0	0	0	0	0	0	0	7.67343	6.18	1	2	0	0	0	0	0	0	0	0	0	0	0	0	0	0	0	0	3.12906	6.18	1	1	7.26365	6.18	1	2	4.48573
isotig18444	vesicle-associated membrane protein 714	217	24.4166	7.86963	1	3	3	6	0	0	0	0	0	0	0	0	0	0	0	0	2.69997	5.07	1	1	0	0	0	0	2.50619	5.07	1	1	3.13132	5.07	1	1	0	0	0	0	0	0	0	0	8.51431	10.6	2	3	0
A0A023FNZ1	Putative pyruvate carboxylase (Fragment) OS=Amblyomma cajennense PE=2 SV=1 - [A0A023FNZ1_9ACAR]	841	93.6514	6.46826	7	2	2	4	0	0	0	0	0	0	0	0	0	0	0	0	0	0	0	0	7.45296	2.02	1	2	0	0	0	0	0	0	0	0	0	0	0	0	2.36309	1.19	1	1	2.15813	2.02	1	1	0
A0A023G712	Uncharacterized protein (Fragment) OS=Amblyomma triste PE=2 SV=1 - [A0A023G712_9ACAR]	258	28.3061	8.17725	1	1	2	4	0	0	0	0	0	0	0	0	0	0	0	0	4.16531	4.26	1	2	0	0	0	0	0	0	0	0	0	0	0	0	0	0	0	0	2.13621	4.26	1	1	2.07318	5.04	1	1	0
A0A1E1X3B4	Putative thyroid hormone receptor-associated coactivator complex component OS=Amblyomma aureolatum PE=2 SV=1 - [A0A1E1X3B4_9ACAR]	1517	165.36	8.23584	5	1	2	4	0	0	0	0	0	0	0	0	0	0	0	0	0	0	0	0	0	0	0	0	2.24846	1.12	1	2	2.05746	0.86	1	1	0	0	0	0	0	0	0	0	2.71377	0.86	1	1	0
A0A131YKF6	Niemann-Pick C1 protein OS=Rhipicephalus appendiculatus PE=4 SV=1 - [A0A131YKF6_RHIAP]	1444	159.621	6.3667	1	1	2	3	0	0	0	0	0	0	0	0	0	0	0	0	0	0	0	0	4.08359	1.59	2	2	0	0	0	0	2.09093	1.11	1	1	0	0	0	0	0	0	0	0	0	0	0	0	0
A0A1E1XMT8	Putative lipoprotein amino terminal region (Fragment) OS=Amblyomma sculptum PE=2 SV=1 - [A0A1E1XMT8_9ACAR]	2359	264.08	7.10791	1	2	2	3	0	0	0	0	0	0	0	0	0	0	0	0	0	0	0	0	0	0	0	0	4.08888	0.64	1	2	0	0	0	0	2.02288	0.34	1	1	0	0	0	0	0	0	0	0	0
A0A1E1XMV3	Putative c2h2-type zn-finger protein OS=Amblyomma sculptum PE=2 SV=1 - [A0A1E1XMV3_9ACAR]	418	46.0761	8.71924	2	1	2	3	0	0	0	0	0	0	0	0	0	0	0	0	4.28903	6.7	2	2	0	0	0	0	0	0	0	0	2.21304	3.59	1	1	0	0	0	0	0	0	0	0	0	0	0	0	0
B7PZ65	Putative uncharacterized protein OS=Ixodes scapularis GN=IscW_ISCW009453 PE=4 SV=1 - [B7PZ65_IXOSC]	305	32.9866	10.9751	1	1	1	3	0	0	0	0	0	0	0	0	0	0	0	0	0	0	0	0	0	0	0	0	4.55734	5.25	1	2	2.03494	5.25	1	1	0	0	0	0	0	0	0	0	0	0	0	0	0
D0UQJ8	Clathrin coat assembly protein (Fragment) OS=Amblyomma sp. 'Amb2' PE=2 SV=1 - [D0UQJ8_9ACAR]	208	22.7799	7.81104	9	1	1	3	0	0	0	0	0	0	0	0	0	0	0	0	4.68853	6.73	1	2	0	0	0	0	0	0	0	0	2.43815	6.73	1	1	0	0	0	0	0	0	0	0	0	0	0	0	0
L7MAP3	Uncharacterized protein (Fragment) OS=Rhipicephalus pulchellus PE=2 SV=1 - [L7MAP3_9ACAR]	257	29.0126	9.72998	1	1	1	3	0	0	0	0	0	0	0	0	0	0	0	0	4.29638	4.28	1	2	0	0	0	0	0	0	0	0	2.19041	4.28	1	1	0	0	0	0	0	0	0	0	0	0	0	0	0
L7MFH9	Uncharacterized protein (Fragment) OS=Rhipicephalus pulchellus PE=2 SV=1 - [L7MFH9_9ACAR]	2119	225.835	9.36377	4	1	3	3	0	0	0	0	0	0	0	0	0	0	0	0	4.32138	1.42	2	2	0	0	0	0	0	0	0	0	2.04878	0.61	1	1	0	0	0	0	0	0	0	0	0	0	0	0	0
A0A131XNL4	Putative wd40 repeat stress protein/actin OS=Hyalomma excavatum PE=2 SV=1 - [A0A131XNL4_9ACAR]	602	66.3245	6.56592	1	1	2	5	0	0	0	0	0	0	0	0	0	0	0	0	4.73898	1.66	1	2	0	0	0	0	0	0	0	0	0	0	0	0	0	0	0	0	0	0	0	0	0	0	0	0	6.21386
B7Q7H2	Kinesin light chain, putative OS=Ixodes scapularis GN=IscW_ISCW011646 PE=4 SV=1 - [B7Q7H2_IXOSC]	565	62.4948	6.40479	11	1	3	4	0	0	0	0	0	0	0	0	0	0	0	0	2.11039	2.48	1	1	0	0	0	0	2.05476	2.48	1	1	0	0	0	0	0	0	0	0	0	0	0	0	0	0	0	0	4.44219
B7QLZ1	Putative uncharacterized protein OS=Ixodes scapularis GN=IscW_ISCW023079 PE=4 SV=1 - [B7QLZ1_IXOSC]	742	82.5145	5.021	1	1	1	4	0	0	0	0	0	0	0	0	0	0	0	0	0	0	0	0	0	0	0	0	4.29267	1.89	1	2	0	0	0	0	0	0	0	0	0	0	0	0	2.14805	1.89	1	1	0
A0A131Z2W7	Mediator of RNA polymerase II transcription subunit 14 OS=Rhipicephalus appendiculatus PE=4 SV=1 - [A0A131Z2W7_RHIAP]	1517	165.633	8.26514	5	1	2	3	0	0	0	0	0	0	0	0	0	0	0	0	0	0	0	0	0	0	0	0	2.24846	1.12	1	2	0	0	0	0	0	0	0	0	0	0	0	0	2.50943	1.19	1	1	0
A0A1D2AJA4	Glioma protein (Fragment) OS=Ornithodoros brasiliensis PE=4 SV=1 - [A0A1D2AJA4_ORNBR]	213	24.9623	9.5249	1	1	2	3	0	0	0	0	0	0	0	0	0	0	0	0	4.36892	5.63	1	2	0	0	0	0	0	0	0	0	0	0	0	0	0	0	0	0	0	0	0	0	0	0	0	0	0
L7MF63	Putative sh3 domain-containing kinase-binding protein 1 (Fragment) OS=Rhipicephalus pulchellus PE=2 SV=1 - [L7MF63_9ACAR]	407	45.3543	8.45557	13	3	3	3	0	0	0	0	0	0	0	0	0	0	0	0	0	0	0	0	0	0	0	0	4.71792	6.39	2	2	0	0	0	0	0	0	0	0	0	0	0	0	0	0	0	0	0
A0A023FQ47	Putative secreted protein (Fragment) OS=Amblyomma cajennense PE=2 SV=1 - [A0A023FQ47_9ACAR]	142	15.8948	7.66455	1	1	1	2	0	0	0	0	0	0	0	0	0	0	0	0	0	0	0	0	0	0	0	0	4.23177	11.97	1	2	0	0	0	0	0	0	0	0	0	0	0	0	0	0	0	0	0
A0A023GIX7	Uncharacterized protein OS=Amblyomma triste PE=2 SV=1 - [A0A023GIX7_9ACAR]	350	40.4709	4.52588	1	1	1	2	0	0	0	0	0	0	0	0	0	0	0	0	0	0	0	0	4.10689	4.86	1	2	0	0	0	0	0	0	0	0	0	0	0	0	0	0	0	0	0	0	0	0	0
A0A090XAT0	Putative immuno cystatin OS=Ixodes ricinus PE=2 SV=1 - [A0A090XAT0_IXORI]	136	14.8987	9.74463	1	1	1	2	0	0	0	0	0	0	0	0	0	0	0	0	0	0	0	0	0	0	0	0	2.14598	12.5	1	2	0	0	0	0	0	0	0	0	0	0	0	0	0	0	0	0	0
A0A090XBS4	Uncharacterized protein (Fragment) OS=Ixodes ricinus PE=2 SV=1 - [A0A090XBS4_IXORI]	113	13.0818	8.29443	1	1	1	2	0	0	0	0	0	0	0	0	0	0	0	0	0	0	0	0	4.57672	12.39	1	2	0	0	0	0	0	0	0	0	0	0	0	0	0	0	0	0	0	0	0	0	0
A0A0C9R2U4	Putative zinc-binding oxidoreductase OS=Amblyomma americanum PE=2 SV=1 - [A0A0C9R2U4_AMBAM]	383	41.688	5.85889	1	1	1	2	0	0	0	0	0	0	0	0	0	0	0	0	2.15016	4.7	1	2	0	0	0	0	0	0	0	0	0	0	0	0	0	0	0	0	0	0	0	0	0	0	0	0	0
A0A0C9RUX6	Putative spou rrna methylase family protein (Fragment) OS=Amblyomma americanum PE=2 SV=1 - [A0A0C9RUX6_AMBAM]	355	39.584	5.98584	2	1	2	2	0	0	0	0	0	0	0	0	0	0	0	0	4.31288	7.32	2	2	0	0	0	0	0	0	0	0	0	0	0	0	0	0	0	0	0	0	0	0	0	0	0	0	0
A0A0C9SEE7	Palmitoyltransferase (Fragment) OS=Amblyomma americanum PE=2 SV=1 - [A0A0C9SEE7_AMBAM]	238	26.8765	6.87354	3	1	1	2	0	0	0	0	0	0	0	0	0	0	0	0	4.69904	6.3	1	2	0	0	0	0	0	0	0	0	0	0	0	0	0	0	0	0	0	0	0	0	0	0	0	0	0
A0A0C9SF78	Putative secreted protein OS=Amblyomma americanum PE=2 SV=1 - [A0A0C9SF78_AMBAM]	164	18.7962	8.36768	1	1	1	2	0	0	0	0	0	0	0	0	0	0	0	0	0	0	0	0	4.32707	7.93	1	2	0	0	0	0	0	0	0	0	0	0	0	0	0	0	0	0	0	0	0	0	0
A0A0K8R5R5	Putative salivary lipocalin OS=Ixodes ricinus PE=2 SV=1 - [A0A0K8R5R5_IXORI]	336	38.6152	6.04932	1	1	1	2	0	0	0	0	0	0	0	0	0	0	0	0	0	0	0	0	4.1717	4.46	1	2	0	0	0	0	0	0	0	0	0	0	0	0	0	0	0	0	0	0	0	0	0
A0A0K8RNM9	Uncharacterized protein OS=Ixodes ricinus PE=2 SV=1 - [A0A0K8RNM9_IXORI]	209	22.5393	9.34912	1	1	1	2	0	0	0	0	0	0	0	0	0	0	0	0	4.20995	7.66	1	2	0	0	0	0	0	0	0	0	0	0	0	0	0	0	0	0	0	0	0	0	0	0	0	0	0
A0A131XCB5	Putative zn2+ transporter OS=Hyalomma excavatum PE=2 SV=1 - [A0A131XCB5_9ACAR]	460	49.5769	6.46826	1	1	1	2	0	0	0	0	0	0	0	0	0	0	0	0	0	0	0	0	4.77481	3.04	1	2	0	0	0	0	0	0	0	0	0	0	0	0	0	0	0	0	0	0	0	0	0
A0A131XMF9	Putative thioredoxin and glutathione reductase selenoprotein OS=Hyalomma excavatum PE=2 SV=1 - [A0A131XMF9_9ACAR]	592	63.7456	6.31592	3	2	2	2	0	0	0	0	0	0	0	0	0	0	0	0	4.65099	4.9	2	2	0	0	0	0	0	0	0	0	0	0	0	0	0	0	0	0	0	0	0	0	0	0	0	0	0
A0A131YYB0	Crossover junction endonuclease MUS81 OS=Rhipicephalus appendiculatus PE=4 SV=1 - [A0A131YYB0_RHIAP]	563	61.7418	8.83643	1	1	1	2	0	0	0	0	0	0	0	0	0	0	0	0	0	0	0	0	4.20934	2.31	1	2	0	0	0	0	0	0	0	0	0	0	0	0	0	0	0	0	0	0	0	0	0
A0A147BJA0	Uncharacterized protein (Fragment) OS=Ixodes ricinus PE=4 SV=1 - [A0A147BJA0_IXORI]	85	9.4979	11.7808	1	1	1	2	0	0	0	0	0	0	0	0	0	0	0	0	0	0	0	0	4.21207	16.47	1	2	0	0	0	0	0	0	0	0	0	0	0	0	0	0	0	0	0	0	0	0	0
A0A147BMC0	Putative mediator of rna polymerase ii transcription subunit (Fragment) OS=Ixodes ricinus PE=4 SV=1 - [A0A147BMC0_IXORI]	103	11.2586	4.22119	1	1	1	2	0	0	0	0	0	0	0	0	0	0	0	0	0	0	0	0	0	0	0	0	4.08934	15.53	1	2	0	0	0	0	0	0	0	0	0	0	0	0	0	0	0	0	0
A0A147BN84	Putative tick transposon (Fragment) OS=Ixodes ricinus PE=4 SV=1 - [A0A147BN84_IXORI]	1134	130.886	8.71924	1	1	1	2	0	0	0	0	0	0	0	0	0	0	0	0	0	0	0	0	2.30455	1.5	1	2	0	0	0	0	0	0	0	0	0	0	0	0	0	0	0	0	0	0	0	0	0
A0A1E1X546	Uncharacterized protein (Fragment) OS=Amblyomma aureolatum PE=2 SV=1 - [A0A1E1X546_9ACAR]	326	37.9855	8.04541	1	1	1	2	0	0	0	0	0	0	0	0	0	0	0	0	0	0	0	0	4.54077	3.37	1	2	0	0	0	0	0	0	0	0	0	0	0	0	0	0	0	0	0	0	0	0	0
A0A1E1XAU9	Putative transcription factor spt20 protein isoform x2 OS=Amblyomma aureolatum PE=2 SV=1 - [A0A1E1XAU9_9ACAR]	721	78.6278	8.66064	1	1	1	2	0	0	0	0	0	0	0	0	0	0	0	0	0	0	0	0	4.23688	1.66	1	2	0	0	0	0	0	0	0	0	0	0	0	0	0	0	0	0	0	0	0	0	0
A0A1E1XRU4	Putative group vii salivary lipocalin (Fragment) OS=Amblyomma sculptum PE=2 SV=1 - [A0A1E1XRU4_9ACAR]	253	29.3417	9.02686	1	1	1	2	0	0	0	0	0	0	0	0	0	0	0	0	4.24117	5.53	1	2	0	0	0	0	0	0	0	0	0	0	0	0	0	0	0	0	0	0	0	0	0	0	0	0	0
A0A1L7H802	Cytochrome c oxidase subunit 1 (Fragment) OS=Ixodes australiensis GN=CO1 PE=3 SV=1 - [A0A1L7H802_9ACAR]	271	29.7142	6.59521	1	1	1	2	0	0	0	0	0	0	0	0	0	0	0	0	0	0	0	0	2.13163	5.9	1	2	0	0	0	0	0	0	0	0	0	0	0	0	0	0	0	0	0	0	0	0	0
B7P803	Liprin-alpha, putative OS=Ixodes scapularis GN=IscW_ISCW017497 PE=4 SV=1 - [B7P803_IXOSC]	1165	130.526	6.07471	4	1	2	2	0	0	0	0	0	0	0	0	0	0	0	0	0	0	0	0	0	0	0	0	4.20974	2.4	2	2	0	0	0	0	0	0	0	0	0	0	0	0	0	0	0	0	0
B7PF82	Phosphodiesterase OS=Ixodes scapularis GN=IscW_ISCW005165 PE=3 SV=1 - [B7PF82_IXOSC]	1042	114.742	6.53662	2	1	1	2	0	0	0	0	0	0	0	0	0	0	0	0	0	0	0	0	4.06778	0.67	1	2	0	0	0	0	0	0	0	0	0	0	0	0	0	0	0	0	0	0	0	0	0
B7PGQ4	Ixoderin B, putative (Fragment) OS=Ixodes scapularis GN=IscW_ISCW003711 PE=4 SV=1 - [B7PGQ4_IXOSC]	232	26.1675	6.85889	1	1	1	2	0	0	0	0	0	0	0	0	0	0	0	0	0	0	0	0	4.32059	6.9	1	2	0	0	0	0	0	0	0	0	0	0	0	0	0	0	0	0	0	0	0	0	0
B7PKE8	Serine protease, putative OS=Ixodes scapularis GN=IscW_ISCW006637 PE=4 SV=1 - [B7PKE8_IXOSC]	103	11.2428	9.01221	1	1	1	2	0	0	0	0	0	0	0	0	0	0	0	0	0	0	0	0	4.22746	17.48	1	2	0	0	0	0	0	0	0	0	0	0	0	0	0	0	0	0	0	0	0	0	0
B7PQQ3	Monocarboxylate transporter, putative (Fragment) OS=Ixodes scapularis GN=IscW_ISCW005587 PE=4 SV=1 - [B7PQQ3_IXOSC]	203	22.7067	7.38623	1	1	1	2	0	0	0	0	0	0	0	0	0	0	0	0	4.0632	5.91	1	2	0	0	0	0	0	0	0	0	0	0	0	0	0	0	0	0	0	0	0	0	0	0	0	0	0
B7PWN6	Histone-lysine N-methyltransferase, bat/ehmt, putative OS=Ixodes scapularis GN=IscW_ISCW019618 PE=4 SV=1 - [B7PWN6_IXOSC]	1033	112.093	8.1333	3	1	1	2	0	0	0	0	0	0	0	0	0	0	0	0	3.00761	1.36	1	2	0	0	0	0	0	0	0	0	0	0	0	0	0	0	0	0	0	0	0	0	0	0	0	0	0
B7PX58	60S ribosomal protein L35A, putative (Fragment) OS=Ixodes scapularis GN=IscW_ISCW024424 PE=4 SV=1 - [B7PX58_IXOSC]	64	7.29001	12.1909	2	1	1	2	0	0	0	0	0	0	0	0	0	0	0	0	4.12157	15.63	1	2	0	0	0	0	0	0	0	0	0	0	0	0	0	0	0	0	0	0	0	0	0	0	0	0	0
B7Q438	Neurogenic locus notch, putative OS=Ixodes scapularis GN=IscW_ISCW011066 PE=4 SV=1 - [B7Q438_IXOSC]	1597	173.949	5.98584	1	1	2	2	0	0	0	0	0	0	0	0	0	0	0	0	0	0	0	0	4.58108	1.88	2	2	0	0	0	0	0	0	0	0	0	0	0	0	0	0	0	0	0	0	0	0	0
B7Q577	Putative uncharacterized protein OS=Ixodes scapularis GN=IscW_ISCW021354 PE=4 SV=1 - [B7Q577_IXOSC]	615	64.6461	8.5874	1	2	2	2	0	0	0	0	0	0	0	0	0	0	0	0	0	0	0	0	0	0	0	0	4.77802	6.5	2	2	0	0	0	0	0	0	0	0	0	0	0	0	0	0	0	0	0
B7Q941	TPIP alpha lipid phosphatase, putative OS=Ixodes scapularis GN=IscW_ISCW021211 PE=4 SV=1 - [B7Q941_IXOSC]	363	41.4677	7.97217	1	1	1	2	0	0	0	0	0	0	0	0	0	0	0	0	0	0	0	0	0	0	0	0	2.24289	3.58	1	2	0	0	0	0	0	0	0	0	0	0	0	0	0	0	0	0	0
B7QH27	Kelch domain-containing protein, putative OS=Ixodes scapularis GN=IscW_ISCW014630 PE=4 SV=1 - [B7QH27_IXOSC]	379	42.6974	6.85889	3	1	1	2	0	0	0	0	0	0	0	0	0	0	0	0	0	0	0	0	0	0	0	0	4.33203	3.69	1	2	0	0	0	0	0	0	0	0	0	0	0	0	0	0	0	0	0
B7QLD6	Putative uncharacterized protein OS=Ixodes scapularis GN=IscW_ISCW014032 PE=4 SV=1 - [B7QLD6_IXOSC]	530	56.862	4.76709	4	1	1	2	0	0	0	0	0	0	0	0	0	0	0	0	4.54643	1.89	1	2	0	0	0	0	0	0	0	0	0	0	0	0	0	0	0	0	0	0	0	0	0	0	0	0	0
E5D586	Dr86 protein OS=Dermacentor reticulatus PE=2 SV=1 - [E5D586_9ACAR]	664	73.2173	6.20166	1	1	1	2	0	0	0	0	0	0	0	0	0	0	0	0	0	0	0	0	4.0503	2.41	1	2	0	0	0	0	0	0	0	0	0	0	0	0	0	0	0	0	0	0	0	0	0
G9NSEKQ01B54U5|---NA---	G9NSEKQ01B54U5|---NA---	76	8.79432	10.2134	1	1	1	2	0	0	0	0	0	0	0	0	0	0	0	0	0	0	0	0	0	0	0	0	2.16672	18.42	1	2	0	0	0	0	0	0	0	0	0	0	0	0	0	0	0	0	0
isotig18611	legumain-like protease precursor	443	49.6787	6.12549	1	1	1	2	0	0	0	0	0	0	0	0	0	0	0	0	0	0	0	0	0	0	0	0	4.89214	2.48	1	2	0	0	0	0	0	0	0	0	0	0	0	0	0	0	0	0	0
L7MED2	Putative growth hormone-regulated tbc protein (Fragment) OS=Rhipicephalus pulchellus PE=2 SV=1 - [L7MED2_9ACAR]	1486	162.019	7.81104	2	1	2	2	0	0	0	0	0	0	0	0	0	0	0	0	0	0	0	0	4.10216	2.22	2	2	0	0	0	0	0	0	0	0	0	0	0	0	0	0	0	0	0	0	0	0	0
L7MG70	Eukaryotic translation initiation factor 5A (Fragment) OS=Rhipicephalus pulchellus PE=2 SV=1 - [L7MG70_9ACAR]	158	17.6447	7.41553	12	2	2	2	0	0	0	0	0	0	0	0	0	0	0	0	0	0	0	0	0	0	0	0	4.46365	15.82	2	2	0	0	0	0	0	0	0	0	0	0	0	0	0	0	0	0	0
L7MI83	Putative secreted peptide (Fragment) OS=Rhipicephalus pulchellus PE=2 SV=1 - [L7MI83_9ACAR]	567	61.6656	6.90283	1	1	1	2	0	0	0	0	0	0	0	0	0	0	0	0	0	0	0	0	4.23262	3	1	2	0	0	0	0	0	0	0	0	0	0	0	0	0	0	0	0	0	0	0	0	0
V5GL33	Putative peptidase family m13 includes neprilysin OS=Ixodes ricinus PE=2 SV=1 - [V5GL33_IXORI]	393	45.3772	9.0415	3	1	1	2	0	0	0	0	0	0	0	0	0	0	0	0	2.66789	3.82	1	2	0	0	0	0	0	0	0	0	0	0	0	0	0	0	0	0	0	0	0	0	0	0	0	0	0
V5HJ79	Putative polyc-binding alphacp-1 (Fragment) OS=Ixodes ricinus PE=2 SV=1 - [V5HJ79_IXORI]	421	43.5829	9.33447	13	1	2	2	0	0	0	0	0	0	0	0	0	0	0	0	0	0	0	0	0	0	0	0	4.2281	5.94	2	2	0	0	0	0	0	0	0	0	0	0	0	0	0	0	0	0	0
V5HY40	Putative secreted protein (Fragment) OS=Ixodes ricinus PE=2 SV=1 - [V5HY40_IXORI]	119	12.9283	8.63135	2	1	1	2	0	0	0	0	0	0	0	0	0	0	0	0	0	0	0	0	0	0	0	0	2.06544	12.61	1	2	0	0	0	0	0	0	0	0	0	0	0	0	0	0	0	0	0
isotig17539	puromycin-sensitive aminopeptidase	691	76.5967	8.86572	1	4	4	13	0	0	0	0	0	0	0	0	0	0	0	0	0	0	0	0	0	0	0	0	2.02825	1.3	1	1	16.5065	5.79	3	5	9.86004	3.47	2	4	3.65275	2.17	1	1	2.24857	2.17	1	1	2.18378
A0A131YIS2	Calmodulin OS=Rhipicephalus appendiculatus PE=4 SV=1 - [A0A131YIS2_RHIAP]	151	17.3782	4.18311	5	3	3	12	0	0	0	0	0	0	0	0	0	0	0	0	0	0	0	0	0	0	0	0	2.11457	9.93	1	1	6.77919	13.91	2	3	6.99889	13.91	2	3	2.7917	5.96	1	1	0	0	0	0	4.95225
isotig09264|cholinesterase-like	isotig09264|cholinesterase-like	520	57.2487	6.48096	3	3	3	15	0	0	0	0	0	0	0	0	0	0	0	0	0	0	0	0	2.05528	1.92	1	1	0	0	0	0	4.99334	4.62	2	2	7.49554	3.65	2	3	2.77003	1.73	1	1	11.8002	6.35	3	4	8.93641
L7MCT8	Putative heat shock protein (Fragment) OS=Rhipicephalus pulchellus PE=2 SV=1 - [L7MCT8_9ACAR]	697	78.1626	6.72705	8	3	3	9	0	0	0	0	0	0	0	0	0	0	0	0	2.04432	1.58	1	1	0	0	0	0	0	0	0	0	2.93835	1.72	1	1	7.68214	3.16	2	3	5.16253	3.16	2	2	4.46661	3.16	2	2	0
B7PZG1	Putative uncharacterized protein OS=Ixodes scapularis GN=IscW_ISCW009774 PE=4 SV=1 - [B7PZG1_IXOSC]	756	85.8264	7.54736	1	1	1	8	0	0	0	0	0	0	0	0	0	0	0	0	2.16219	1.46	1	1	0	0	0	0	0	0	0	0	2.28811	1.46	1	1	4.05871	1.46	1	2	7.21073	1.46	1	3	0	0	0	0	0
A0A131YPL7	Histidine ammonia-lyase OS=Rhipicephalus appendiculatus PE=3 SV=1 - [A0A131YPL7_RHIAP]	657	72.2903	6.87354	1	1	3	7	0	0	0	0	0	0	0	0	0	0	0	0	0	0	0	0	2.12369	2.13	1	1	0	0	0	0	2.07997	1.67	1	1	4.25093	2.13	1	2	4.22986	1.22	1	2	2.51475	2.13	1	1	0
B7Q381	Putative uncharacterized protein OS=Ixodes scapularis GN=IscW_ISCW009032 PE=4 SV=1 - [B7Q381_IXOSC]	4257	476.161	8.57275	1	2	2	7	0	0	0	0	0	0	0	0	0	0	0	0	2.00989	0.19	1	1	0	0	0	0	0	0	0	0	4.17632	0.42	1	2	4.61091	0.19	1	2	2.01813	0.19	1	1	0	0	0	0	2.32953
isotig17570	alpha-galactosidase a-like	518	58.4425	5.97314	2	4	4	15	0	0	0	0	0	0	0	0	0	0	0	0	2.28887	2.51	1	1	0	0	0	0	0	0	0	0	2.55792	1.93	1	1	2.19919	1.93	1	1	4.56561	1.93	1	2	8.15125	4.63	2	3	13.2379
A0A147BDK7	Putative alpha-macroglobulin OS=Ixodes ricinus PE=4 SV=1 - [A0A147BDK7_IXORI]	1646	180.535	7.04932	2	2	2	7	0	0	0	0	0	0	0	0	0	0	0	0	2.34024	1.09	1	1	0	0	0	0	0	0	0	0	2.4507	1.09	1	1	0	0	0	0	6.7935	2.19	2	3	0	0	0	0	2.60856
A0A1D2AIK6	Myosin heavy skeletal muscle or cardiac (Fragment) OS=Ornithodoros brasiliensis PE=4 SV=1 - [A0A1D2AIK6_ORNBR]	250	28.2938	5.2876	1	1	2	6	0	0	0	0	0	0	0	0	0	0	0	0	0	0	0	0	0	0	0	0	2.02414	4	1	1	4.617	4	1	2	2.00684	4	1	1	2.00759	4	1	1	2.25542	4.4	1	1	0
A0A1E1X5W6	Putative nuclear protein export factor (Fragment) OS=Amblyomma aureolatum PE=2 SV=1 - [A0A1E1X5W6_9ACAR]	1436	156.177	7.02002	1	2	2	7	0	0	0	0	0	0	0	0	0	0	0	0	2.49661	0.91	1	1	0	0	0	0	0	0	0	0	0	0	0	0	6.36877	0.97	1	3	0	0	0	0	4.58523	0.97	1	2	2.18942
L7MLM6	Putative m13 family peptidase (Fragment) OS=Rhipicephalus pulchellus PE=2 SV=1 - [L7MLM6_9ACAR]	731	83.0099	8.57275	2	2	2	6	0	0	0	0	0	0	0	0	0	0	0	0	2.058	1.78	1	1	0	0	0	0	0	0	0	0	0	0	0	0	4.16913	1.92	1	2	2.41936	1.92	1	1	0	0	0	0	2.04954
A0A0C9SFJ7	Putative asparaginase (Fragment) OS=Amblyomma americanum PE=2 SV=1 - [A0A0C9SFJ7_AMBAM]	341	36.415	6.72705	1	1	1	5	0	0	0	0	0	0	0	0	0	0	0	0	0	0	0	0	0	0	0	0	2.22748	4.11	1	1	2.10676	4.11	1	1	4.85563	4.11	1	2	0	0	0	0	0	0	0	0	0
B7QBL3	Histidine ammonia-lyase OS=Ixodes scapularis GN=IscW_ISCW012913 PE=3 SV=1 - [B7QBL3_IXOSC]	657	72.5233	7.06396	1	1	4	5	0	0	0	0	0	0	0	0	0	0	0	0	2.07236	2.13	1	1	0	0	0	0	0	0	0	0	2.07997	1.67	1	1	0	0	0	0	4.22986	1.22	1	2	0	0	0	0	0
A0A1E1XTA3	Putative lpxtg-motif cell wall anchor domain protein (Fragment) OS=Amblyomma sculptum PE=2 SV=1 - [A0A1E1XTA3_9ACAR]	1251	116.949	5.74463	1	1	1	4	0	0	0	0	0	0	0	0	0	0	0	0	0	0	0	0	0	0	0	0	2.3094	1.44	1	1	4.22497	1.44	1	2	0	0	0	0	2.14785	1.44	1	1	0	0	0	0	0
isotig18720	carboxypeptidase a2	499	54.9708	8.51416	1	2	2	4	0	0	0	0	0	0	0	0	0	0	0	0	2.11884	2.4	1	1	0	0	0	0	0	0	0	0	7.06971	4.41	2	3	0	0	0	0	0	0	0	0	0	0	0	0	0
A0A0C9S209	Putative 60s ribosomal protein l5 (Fragment) OS=Amblyomma americanum PE=2 SV=1 - [A0A0C9S209_AMBAM]	249	28.3544	8.646	6	2	2	9	0	0	0	0	0	0	0	0	0	0	0	0	0	0	0	0	0	0	0	0	2.30472	3.21	1	1	4.33548	6.83	2	2	0	0	0	0	0	0	0	0	4.73335	6.83	2	2	4.80346
V5HKW9	Putative ubiquitin-conjugating enzyme e2-17 kDa (Fragment) OS=Ixodes ricinus PE=2 SV=1 - [V5HKW9_IXORI]	101	11.5518	8.66064	24	1	1	7	0	0	0	0	0	0	0	0	0	0	0	0	2.24396	10.89	1	1	0	0	0	0	0	0	0	0	3.0268	10.89	1	1	0	0	0	0	2.1916	10.89	1	1	2.78668	10.89	1	1	2.80395
A0A0K8RN47	Putative rnase l inhibitor abc superfamily (Fragment) OS=Ixodes ricinus PE=2 SV=1 - [A0A0K8RN47_IXORI]	604	68.1002	8.08936	3	1	2	6	0	0	0	0	0	0	0	0	0	0	0	0	0	0	0	0	2.0984	1.66	1	1	0	0	0	0	0	0	0	0	0	0	0	0	4.5926	1.66	1	2	2.54839	1.66	1	1	4.583
A0A131XNA0	Putative rnase l inhibitor abc superfamily protein (Fragment) OS=Hyalomma excavatum PE=2 SV=1 - [A0A131XNA0_9ACAR]	590	66.3333	7.86963	2	1	2	6	0	0	0	0	0	0	0	0	0	0	0	0	0	0	0	0	2.0984	1.69	1	1	0	0	0	0	0	0	0	0	0	0	0	0	4.5926	1.69	1	2	0	0	0	0	4.583
A0A0K8R2K1	Putative membrane metallo-endopeptidase-like 1 (Fragment) OS=Ixodes ricinus PE=2 SV=1 - [A0A0K8R2K1_IXORI]	615	71.3085	5.84619	2	2	2	5	0	0	0	0	0	0	0	0	0	0	0	0	2.63379	2.28	1	1	0	0	0	0	0	0	0	0	5.04126	2.28	1	2	0	0	0	0	0	0	0	0	4.26934	2.28	1	2	0
A0A131Z6G9	Uncharacterized protein OS=Rhipicephalus appendiculatus PE=4 SV=1 - [A0A131Z6G9_RHIAP]	243	27.4855	6.66846	1	1	1	5	0	0	0	0	0	0	0	0	0	0	0	0	0	0	0	0	2.27259	6.58	1	1	0	0	0	0	5.11284	6.58	1	2	0	0	0	0	0	0	0	0	2.0995	6.58	1	1	0
A0A1E1X9W8	Putative ran gtpase-activating protein OS=Amblyomma aureolatum PE=2 SV=1 - [A0A1E1X9W8_9ACAR]	572	61.058	4.97021	1	1	2	4	0	0	0	0	0	0	0	0	0	0	0	0	2.15539	2.1	1	1	0	0	0	0	0	0	0	0	4.28053	1.75	1	2	0	0	0	0	0	0	0	0	0	0	0	0	2.05274
G3MJN9	Uncharacterized protein (Fragment) OS=Amblyomma maculatum PE=2 SV=1 - [G3MJN9_9ACAR]	504	55.8789	9.59814	1	3	3	4	0	0	0	0	0	0	0	0	0	0	0	0	0	0	0	0	2.24216	2.58	1	1	0	0	0	0	4.04401	5.95	2	2	0	0	0	0	0	0	0	0	0	0	0	0	0
A0A023GNA9	Uncharacterized protein OS=Amblyomma triste PE=2 SV=1 - [A0A023GNA9_9ACAR]	472	53.8536	9.45166	2	1	1	3	0	0	0	0	0	0	0	0	0	0	0	0	0	0	0	0	0	0	0	0	2.04079	2.97	1	1	4.56111	2.97	1	2	0	0	0	0	0	0	0	0	0	0	0	0	0
A0A0C9SC51	Putative 40s ribosomal protein s15 (Fragment) OS=Amblyomma americanum PE=2 SV=1 - [A0A0C9SC51_AMBAM]	131	14.9551	10.0815	5	2	2	3	0	0	0	0	0	0	0	0	0	0	0	0	0	0	0	0	2.30019	9.92	1	1	0	0	0	0	4.36291	11.45	2	2	0	0	0	0	0	0	0	0	0	0	0	0	0
A0A131XQF5	Putative focal adhesion adaptor protein paxillin OS=Hyalomma excavatum PE=2 SV=1 - [A0A131XQF5_9ACAR]	2436	265.142	6.31592	1	2	2	3	0	0	0	0	0	0	0	0	0	0	0	0	0	0	0	0	2.28717	0.37	1	1	0	0	0	0	4.63737	1.03	2	2	0	0	0	0	0	0	0	0	0	0	0	0	0
A0A131XUG0	Putative guanylate-binding protein (Fragment) OS=Ixodes ricinus PE=2 SV=1 - [A0A131XUG0_IXORI]	615	69.3725	8.45557	1	2	2	3	0	0	0	0	0	0	0	0	0	0	0	0	0	0	0	0	2.09937	2.28	1	1	0	0	0	0	4.54141	2.28	1	2	0	0	0	0	0	0	0	0	0	0	0	0	0
A0A131XXF2	Uncharacterized protein OS=Ixodes ricinus PE=2 SV=1 - [A0A131XXF2_IXORI]	1367	148.592	5.69385	6	3	3	3	0	0	0	0	0	0	0	0	0	0	0	0	2.01008	0.8	1	1	0	0	0	0	0	0	0	0	4.91958	2.49	2	2	0	0	0	0	0	0	0	0	0	0	0	0	0
L7LTN5	Putative tick transposon OS=Rhipicephalus pulchellus PE=2 SV=1 - [L7LTN5_9ACAR]	818	92.0697	9.23193	1	2	2	3	0	0	0	0	0	0	0	0	0	0	0	0	0	0	0	0	0	0	0	0	2.04748	1.22	1	1	4.18322	2.57	2	2	0	0	0	0	0	0	0	0	0	0	0	0	0
L7MD64	Putative tick transposon (Fragment) OS=Rhipicephalus pulchellus PE=2 SV=1 - [L7MD64_9ACAR]	979	109.814	9.34912	1	1	1	3	0	0	0	0	0	0	0	0	0	0	0	0	2.32004	1.53	1	1	0	0	0	0	0	0	0	0	0	0	0	0	0	0	0	0	4.32429	1.53	1	2	0	0	0	0	0
V5H9V2	Putative myosin complex (Fragment) OS=Ixodes ricinus PE=2 SV=1 - [V5H9V2_IXORI]	919	100.134	5.19873	5	3	3	3	0	0	0	0	0	0	0	0	0	0	0	0	0	0	0	0	2.02754	1.09	1	1	0	0	0	0	0	0	0	0	4.23448	2.18	2	2	0	0	0	0	0	0	0	0	0
V5HPS1	Putative flap endonuclease gen protein 1 OS=Ixodes ricinus PE=2 SV=1 - [V5HPS1_IXORI]	343	39.6339	8.35303	4	1	1	3	0	0	0	0	0	0	0	0	0	0	0	0	0	0	0	0	2.03775	4.37	1	1	0	0	0	0	0	0	0	0	0	0	0	0	4.15977	4.37	1	2	0	0	0	0	0
A0A131YD43	Serrate RNA effector molecule-like protein OS=Rhipicephalus appendiculatus PE=4 SV=1 - [A0A131YD43_RHIAP]	889	100.262	5.64307	10	1	2	7	0	0	0	0	0	0	0	0	0	0	0	0	0	0	0	0	0	0	0	0	2.04361	0.9	1	1	0	0	0	0	2.14458	0.9	1	1	0	0	0	0	0	0	0	0	5.17098
A0A1E1X429	Putative microtubule-associated protein (Fragment) OS=Amblyomma aureolatum PE=2 SV=1 - [A0A1E1X429_9ACAR]	1736	187.664	9.40771	2	2	3	6	0	0	0	0	0	0	0	0	0	0	0	0	0	0	0	0	2.07957	0.69	1	1	0	0	0	0	0	0	0	0	0	0	0	0	2.16624	0.52	1	1	4.09038	1.15	2	2	2.13627
B7Q4S9	Rho-associated kinase, putative (Fragment) OS=Ixodes scapularis GN=IscW_ISCW011682 PE=3 SV=1 - [B7Q4S9_IXOSC]	1245	140.959	6.7124	3	2	2	6	0	0	0	0	0	0	0	0	0	0	0	0	0	0	0	0	0	0	0	0	2.19974	1.12	1	1	0	0	0	0	0	0	0	0	2.22565	1.12	1	1	4.67685	1.12	1	2	2.24611
A0A147BB46	Uncharacterized protein (Fragment) OS=Ixodes ricinus PE=4 SV=1 - [A0A147BB46_IXORI]	176	19.4587	8.1333	1	2	2	4	0	0	0	0	0	0	0	0	0	0	0	0	2.1159	5.68	1	1	0	0	0	0	0	0	0	0	2.16403	5.68	1	1	0	0	0	0	0	0	0	0	4.28879	5.68	2	2	0
A0A1E1X6H4	Putative sulfotransferase (Fragment) OS=Amblyomma aureolatum PE=2 SV=1 - [A0A1E1X6H4_9ACAR]	320	36.9478	6.34131	1	1	1	4	0	0	0	0	0	0	0	0	0	0	0	0	0	0	0	0	2.08086	2.81	1	1	0	0	0	0	2.09342	2.81	1	1	0	0	0	0	0	0	0	0	0	0	0	0	0
B7PB49	Putative uncharacterized protein OS=Ixodes scapularis GN=IscW_ISCW002424 PE=4 SV=1 - [B7PB49_IXOSC]	218	24.5559	9.93506	2	1	1	4	0	0	0	0	0	0	0	0	0	0	0	0	0	0	0	0	0	0	0	0	2.01378	6.88	1	1	2.20154	6.88	1	1	0	0	0	0	0	0	0	0	0	0	0	0	0
B7QH74	GTP-binding protein DRG2, putative OS=Ixodes scapularis GN=IscW_ISCW023585 PE=4 SV=1 - [B7QH74_IXOSC]	364	41.3077	8.60205	17	4	4	8	0	0	0	0	0	0	0	0	0	0	0	0	0	0	0	0	2.05113	4.12	1	1	0	0	0	0	0	0	0	0	0	0	0	0	0	0	0	0	7.83366	6.04	2	3	2.03654
A0A023FNG2	Putative arsenite-resistance protein (Fragment) OS=Amblyomma cajennense PE=2 SV=1 - [A0A023FNG2_9ACAR]	546	60.7502	6.13818	8	1	2	6	0	0	0	0	0	0	0	0	0	0	0	0	0	0	0	0	0	0	0	0	2.16737	3.11	1	1	0	0	0	0	0	0	0	0	0	0	0	0	0	0	0	0	5.17098
A0A131Z231	Mitochondrial chaperone BCS1 OS=Rhipicephalus appendiculatus PE=3 SV=1 - [A0A131Z231_RHIAP]	423	47.3682	7.62061	1	1	1	6	0	0	0	0	0	0	0	0	0	0	0	0	0	0	0	0	0	0	0	0	2.01427	2.84	1	1	0	0	0	0	0	0	0	0	0	0	0	0	4.48755	2.84	1	2	4.91395
isotig23104	ves g 5 allergen	237	26.3884	8.45557	1	3	3	6	0	0	0	0	0	0	0	0	0	0	0	0	0	0	0	0	0	0	0	0	2.15924	6.75	1	1	0	0	0	0	0	0	0	0	0	0	0	0	2.69267	5.06	1	1	2.38127
B7PU50	3-hydroxyanthranilate 3,4-dioxygenase, putative OS=Ixodes scapularis GN=IscW_ISCW007038 PE=4 SV=1 - [B7PU50_IXOSC]	184	21.2267	6.53662	2	1	2	5	0	0	0	0	0	0	0	0	0	0	0	0	2.00277	3.8	1	1	0	0	0	0	0	0	0	0	0	0	0	0	0	0	0	0	0	0	0	0	2.33778	5.43	1	1	2.65421
A0A131Y714	Putative ribosomal protein s25 OS=Ixodes ricinus PE=2 SV=1 - [A0A131Y714_IXORI]	125	13.8779	10.2134	14	3	4	4	0	0	0	0	0	0	0	0	0	0	0	0	0	0	0	0	0	0	0	0	2.15234	12.8	1	1	0	0	0	0	0	0	0	0	0	0	0	0	0	0	0	0	0
A0A131Z2I8	ATP-binding cassette, subfamily C (CFTR/MRP), member 5 OS=Rhipicephalus appendiculatus PE=4 SV=1 - [A0A131Z2I8_RHIAP]	1419	157.219	8.17725	4	1	2	4	0	0	0	0	0	0	0	0	0	0	0	0	0	0	0	0	2.10446	0.56	1	1	0	0	0	0	0	0	0	0	0	0	0	0	0	0	0	0	0	0	0	0	4.08819
B7PPU4	Putative uncharacterized protein OS=Ixodes scapularis GN=IscW_ISCW019186 PE=4 SV=1 - [B7PPU4_IXOSC]	154	16.5412	9.53955	1	1	1	4	0	0	0	0	0	0	0	0	0	0	0	0	2.21079	7.79	1	1	0	0	0	0	0	0	0	0	0	0	0	0	0	0	0	0	0	0	0	0	2.11338	7.79	1	1	4.37442
isotig12025	amblyomma 40-33 family member	218	23.3262	8.70459	1	2	2	4	0	0	0	0	0	0	0	0	0	0	0	0	2.0794	5.5	1	1	0	0	0	0	0	0	0	0	0	0	0	0	0	0	0	0	0	0	0	0	6.06133	6.42	1	2	0
A0A131XM41	Phosphotransferase (Fragment) OS=Hyalomma excavatum PE=2 SV=1 - [A0A131XM41_9ACAR]	469	52.8129	8.11865	5	2	2	3	0	0	0	0	0	0	0	0	0	0	0	0	0	0	0	0	0	0	0	0	2.61809	5.12	1	1	0	0	0	0	0	0	0	0	0	0	0	0	7.22903	2.99	1	2	0
A0A131Y4H2	Putative guanine nucleotide exchange factor for ras-like small gtpase (Fragment) OS=Ixodes ricinus PE=2 SV=1 - [A0A131Y4H2_IXORI]	682	74.8314	7.73779	2	1	2	3	0	0	0	0	0	0	0	0	0	0	0	0	0	0	0	0	2.04097	1.47	1	1	0	0	0	0	0	0	0	0	0	0	0	0	0	0	0	0	0	0	0	0	0
B7PKG4	Putative uncharacterized protein OS=Ixodes scapularis GN=IscW_ISCW006431 PE=4 SV=1 - [B7PKG4_IXOSC]	304	33.1217	7.78174	1	1	1	3	0	0	0	0	0	0	0	0	0	0	0	0	0	0	0	0	2.08606	4.28	1	1	0	0	0	0	0	0	0	0	0	0	0	0	0	0	0	0	0	0	0	0	4.30796
isotig15487|calnexin	isotig15487|calnexin	474	53.7154	4.99561	2	3	3	3	0	0	0	0	0	0	0	0	0	0	0	0	0	0	0	0	0	0	0	0	2.93582	2.53	1	1	0	0	0	0	0	0	0	0	0	0	0	0	0	0	0	0	0
L7LR42	Putative group i salivary lipocalin OS=Rhipicephalus pulchellus PE=2 SV=1 - [L7LR42_9ACAR]	208	23.575	9.53955	2	1	1	3	0	0	0	0	0	0	0	0	0	0	0	0	0	0	0	0	2.05281	5.29	1	1	0	0	0	0	0	0	0	0	0	0	0	0	0	0	0	0	0	0	0	0	4.37778
L7ML85	Putative secreted peptide (Fragment) OS=Rhipicephalus pulchellus PE=2 SV=1 - [L7ML85_9ACAR]	192	21.4493	10.3745	1	1	1	3	0	0	0	0	0	0	0	0	0	0	0	0	2.001	7.81	1	1	0	0	0	0	0	0	0	0	0	0	0	0	0	0	0	0	0	0	0	0	2.07023	7.81	1	2	0
isotig21096	PREDICTED: uncharacterized protein LOC100900008	185	20.9536	5.64307	1	4	4	15	0	0	0	0	0	0	0	0	0	0	0	0	0	0	0	0	0	0	0	0	0	0	0	0	13.1401	23.78	3	4	7.40617	14.05	2	3	6.24528	7.57	1	2	10.5644	16.22	2	3	2.39618
isotig21385	cathepsin s-like	337	37.4458	8.104	1	9	9	33	0	0	0	0	0	0	0	0	0	0	0	0	0	0	0	0	0	0	0	0	0	0	0	0	26.7623	17.8	4	7	2.94891	3.56	1	1	0	0	0	0	20.8134	25.22	6	6	32.4973
isotig20927	cathepsin l	336	37.6525	8.29443	1	5	5	22	0	0	0	0	0	0	0	0	0	0	0	0	0	0	0	0	0	0	0	0	0	0	0	0	10.3302	9.52	2	3	9.87491	3.57	1	3	5.49838	8.63	2	2	22.0129	12.2	4	7	9.37601
L7M4S6	Putative p21-activated protein kinase-interacting protein OS=Rhipicephalus pulchellus PE=2 SV=1 - [L7M4S6_9ACAR]	473	51.5976	7.48877	6	1	1	8	0	0	0	0	0	0	0	0	0	0	0	0	0	0	0	0	0	0	0	0	0	0	0	0	0	0	0	0	15.1204	2.33	1	7	0	0	0	0	2.63969	2.33	1	1	0
isotig01229	secreted salivary gland	233	24.4325	8.44092	2	2	2	11	0	0	0	0	0	0	0	0	0	0	0	0	0	0	0	0	0	0	0	0	0	0	0	0	5.80268	6.01	1	2	6.01796	6.01	1	2	6.49157	6.01	1	2	3.37998	6.01	1	1	6.76019
isotig11107	secreted salivary gland	226	24.1199	7.44482	2	2	2	11	0	0	0	0	0	0	0	0	0	0	0	0	0	0	0	0	0	0	0	0	0	0	0	0	7.27528	5.75	1	2	2.56364	4.87	1	1	9.82141	10.62	2	3	4.016	5.75	1	1	3.50692
A0A131YU26	Tissue factor pathway inhibitor OS=Rhipicephalus appendiculatus PE=4 SV=1 - [A0A131YU26_RHIAP]	288	33.9741	8.51416	1	1	1	10	0	0	0	0	0	0	0	0	0	0	0	0	0	0	0	0	0	0	0	0	0	0	0	0	5.68944	5.21	1	4	0	0	0	0	2.24613	5.21	1	2	2.50621	5.21	1	2	2.50673
isotig08223	brain chitinase and chia	424	46.9266	7.00537	2	2	2	8	0	0	0	0	0	0	0	0	0	0	0	0	0	0	0	0	0	0	0	0	0	0	0	0	5.92667	2.59	1	2	0	0	0	0	7.39051	5.19	2	3	2.38315	2.59	1	1	0
A0A023FBL0	Putative secreted protein OS=Amblyomma cajennense PE=2 SV=1 - [A0A023FBL0_9ACAR]	98	11.0438	11.7661	1	1	1	5	0	0	0	0	0	0	0	0	0	0	0	0	0	0	0	0	0	0	0	0	0	0	0	0	0	0	0	0	4.59515	13.27	1	2	6.56746	13.27	1	3	0	0	0	0	0
B7QGF5	Procollagen-lysine, 2-oxoglutarate 5-dioxygenase, putative (Fragment) OS=Ixodes scapularis GN=IscW_ISCW024762 PE=4 SV=1 - [B7QGF5_IXOSC]	52	6.39816	5.68115	7	1	1	5	0	0	0	0	0	0	0	0	0	0	0	0	0	0	0	0	0	0	0	0	0	0	0	0	2.0905	21.15	1	1	4.29577	21.15	1	2	4.90902	21.15	1	2	0	0	0	0	0
Q09JQ7	60S ribosomal protein L28 OS=Argas monolakensis PE=2 SV=1 - [Q09JQ7_ARGMO]	142	16.3512	11.8101	1	1	1	8	0	0	0	0	0	0	0	0	0	0	0	0	0	0	0	0	0	0	0	0	0	0	0	0	2.2809	7.04	1	1	2.27815	7.04	1	1	5.03676	7.04	1	2	5.12865	7.04	1	2	2.65003
isotig15598	PREDICTED: uncharacterized protein LOC100900295	245	27.3375	5.08447	1	1	1	7	0	0	0	0	0	0	0	0	0	0	0	0	0	0	0	0	0	0	0	0	0	0	0	0	4.0837	5.31	1	1	5.5832	5.31	1	2	3.29489	5.31	1	1	4.11742	5.31	1	1	4.01929
G3MK40	Uncharacterized protein OS=Amblyomma maculatum PE=2 SV=1 - [G3MK40_9ACAR]	533	59.3512	8.19189	1	1	1	5	0	0	0	0	0	0	0	0	0	0	0	0	0	0	0	0	0	0	0	0	0	0	0	0	2.10183	2.63	1	1	4.27292	2.63	1	2	2.0453	2.63	1	1	2.16335	2.63	1	1	0
isotig24347	tick salivary serpin	289	33.0056	5.24951	1	3	3	4	0	0	0	0	0	0	0	0	0	0	0	0	0	0	0	0	0	0	0	0	0	0	0	0	8.58369	7.96	2	3	0	0	0	0	2.70393	3.81	1	1	0	0	0	0	0
isotig21530	cathepsin l-like	340	37.8239	8.60205	1	6	6	21	0	0	0	0	0	0	0	0	0	0	0	0	0	0	0	0	0	0	0	0	0	0	0	0	9.13774	11.47	3	3	0	0	0	0	0	0	0	0	11.5224	11.76	3	4	27.7549
A0A0M4FS50	Uncharacterized protein OS=Dermanyssus gallinae PE=2 SV=1 - [A0A0M4FS50_9ACAR]	201	22.3852	9.12939	1	4	4	11	0	0	0	0	0	0	0	0	0	0	0	0	0	0	0	0	0	0	0	0	0	0	0	0	4.45149	11.44	2	2	0	0	0	0	2.34689	4.98	1	1	8.98205	12.44	2	3	7.34309
isotig28223|---NA---	isotig28223|---NA---	190	20.9575	9.24658	1	4	4	11	0	0	0	0	0	0	0	0	0	0	0	0	0	0	0	0	0	0	0	0	0	0	0	0	7.27322	6.84	1	2	0	0	0	0	2.38276	5.26	1	1	4.67227	12.11	2	2	9.40727
A0A131YP82	Uncharacterized protein OS=Rhipicephalus appendiculatus PE=4 SV=1 - [A0A131YP82_RHIAP]	213	22.7412	4.22119	1	1	1	10	0	0	0	0	0	0	0	0	0	0	0	0	0	0	0	0	0	0	0	0	0	0	0	0	2.33895	7.51	1	1	2.44822	7.51	1	1	2.05281	7.51	1	1	5.33154	7.51	1	2	6.97014
isotig17122|---NA---	isotig17122|---NA---	159	17.8998	4.76709	1	3	3	9	0	0	0	0	0	0	0	0	0	0	0	0	0	0	0	0	0	0	0	0	0	0	0	0	3.81206	8.18	1	1	7.10089	8.18	1	2	0	0	0	0	3.32398	8.18	1	1	6.99942
A0A090XDH4	Putative gamma-interferon inducible lysosomal thiol reductase OS=Ixodes ricinus PE=2 SV=1 - [A0A090XDH4_IXORI]	245	26.3401	8.23584	1	1	1	8	0	0	0	0	0	0	0	0	0	0	0	0	0	0	0	0	0	0	0	0	0	0	0	0	0	0	0	0	2.23471	5.31	1	1	4.42691	5.31	1	2	6.30788	5.31	1	3	2.05217
A0A023FFH5	Putative calmodulin (Fragment) OS=Amblyomma cajennense PE=2 SV=1 - [A0A023FFH5_9ACAR]	148	16.6688	4.22119	21	4	4	7	0	0	0	0	0	0	0	0	0	0	0	0	0	0	0	0	0	0	0	0	0	0	0	0	5.34821	18.92	2	2	0	0	0	0	2.84252	10.81	1	1	11.3614	22.3	3	4	0
A0A023G9V6	Uncharacterized protein OS=Amblyomma triste PE=2 SV=1 - [A0A023G9V6_9ACAR]	175	20.529	6.07471	1	1	1	7	0	0	0	0	0	0	0	0	0	0	0	0	0	0	0	0	0	0	0	0	0	0	0	0	2.28447	8	1	1	0	0	0	0	4.26388	8	1	2	2.28359	8	1	1	0
A0A1E1WZ03	Putative ribosomal protein l21 OS=Amblyomma aureolatum PE=2 SV=1 - [A0A1E1WZ03_9ACAR]	117	13.8505	11.312	12	1	1	7	0	0	0	0	0	0	0	0	0	0	0	0	0	0	0	0	0	0	0	0	0	0	0	0	2.27099	6.84	1	1	2.16796	6.84	1	1	2.26558	6.84	1	1	4.11905	6.84	1	2	2.36444
B7PA72	Heat domain-containing protein, putative (Fragment) OS=Ixodes scapularis GN=IscW_ISCW017466 PE=4 SV=1 - [B7PA72_IXOSC]	990	109.551	6.1001	3	1	1	6	0	0	0	0	0	0	0	0	0	0	0	0	0	0	0	0	0	0	0	0	0	0	0	0	2.01498	1.11	1	1	2.21158	1.11	1	1	2.21185	1.11	1	1	2.0281	1.11	1	1	4.30153
isotig17016	soluble calcium-activated nucleotidase 1	378	42.8757	7.89893	1	5	5	6	0	0	0	0	0	0	0	0	0	0	0	0	0	0	0	0	0	0	0	0	0	0	0	0	7.8455	10.85	3	3	0	0	0	0	0	0	0	0	4.26051	4.23	2	2	0
B7PIV0	Putative uncharacterized protein (Fragment) OS=Ixodes scapularis GN=IscW_ISCW004980 PE=4 SV=1 - [B7PIV0_IXOSC]	83	10.2508	11.7515	1	1	1	5	0	0	0	0	0	0	0	0	0	0	0	0	0	0	0	0	0	0	0	0	0	0	0	0	4.419	13.25	1	2	0	0	0	0	2.42682	13.25	1	1	4.60372	13.25	1	2	0
isotig15737	probable serine carboxypeptidase cpvl isoform 2	462	51.6364	6.48096	1	3	3	5	0	0	0	0	0	0	0	0	0	0	0	0	0	0	0	0	0	0	0	0	0	0	0	0	6.1926	5.41	2	2	0	0	0	0	2.47087	3.03	1	1	6.80239	2.81	1	2	0
L7M803	Putative 4-aminobutyrate aminotransferase OS=Rhipicephalus pulchellus PE=2 SV=1 - [L7M803_9ACAR]	491	54.3467	8.49951	11	3	3	5	0	0	0	0	0	0	0	0	0	0	0	0	0	0	0	0	0	0	0	0	0	0	0	0	2.44667	1.83	1	1	0	0	0	0	6.54341	2.24	1	2	4.69798	5.7	2	2	0
V5HEC9	Putative 2-oxoglutarate dehydrogenase e1 subunit (Fragment) OS=Ixodes ricinus PE=2 SV=1 - [V5HEC9_IXORI]	976	109.728	6.85889	13	5	5	5	0	0	0	0	0	0	0	0	0	0	0	0	0	0	0	0	0	0	0	0	0	0	0	0	7.30745	2.15	2	2	0	0	0	0	2.1301	0.82	1	1	4.53355	1.95	2	2	0
A0A023FCA3	Putative 3'5'-cyclic nucleotide phosphodiesterase (Fragment) OS=Amblyomma cajennense PE=2 SV=1 - [A0A023FCA3_9ACAR]	662	73.7963	6.93213	5	2	2	4	0	0	0	0	0	0	0	0	0	0	0	0	0	0	0	0	0	0	0	0	0	0	0	0	2.21599	2.72	1	1	0	0	0	0	4.8528	2.11	1	2	2.35353	2.11	1	1	0
A0A131XZ51	Putative dehydrogenase with different specificities related to short-chain alcohol dehydrogenase (Fragment) OS=Ixodes ricinus PE=2 SV=1 - [A0A131XZ51_IXORI]	201	22.5138	8.67529	3	1	1	4	0	0	0	0	0	0	0	0	0	0	0	0	0	0	0	0	0	0	0	0	0	0	0	0	0	0	0	0	4.21838	6.47	1	2	2.11832	6.47	1	1	0	0	0	0	2.33518
isotig15470	carboxypeptidase a2	898	96.6354	5.24951	1	3	3	4	0	0	0	0	0	0	0	0	0	0	0	0	0	0	0	0	0	0	0	0	0	0	0	0	7.64203	3.01	2	3	0	0	0	0	0	0	0	0	0	0	0	0	3.10338
isotig23133	PREDICTED: uncharacterized protein LOC100900008	184	21.5088	5.8335	1	2	2	4	0	0	0	0	0	0	0	0	0	0	0	0	0	0	0	0	0	0	0	0	0	0	0	0	4.62732	10.87	2	2	0	0	0	0	2.11381	5.43	1	1	0	0	0	0	0
L7MAS9	Putative secreted mucin muc17 (Fragment) OS=Rhipicephalus pulchellus PE=2 SV=1 - [L7MAS9_9ACAR]	3165	331.876	6.27783	5	1	3	4	0	0	0	0	0	0	0	0	0	0	0	0	0	0	0	0	0	0	0	0	0	0	0	0	4.3356	0.85	2	2	0	0	0	0	2.18464	0.41	1	1	2.11828	0.41	1	1	0
L7MLS0	Uncharacterized protein (Fragment) OS=Rhipicephalus pulchellus PE=2 SV=1 - [L7MLS0_9ACAR]	2798	310.437	5.19873	3	1	2	4	0	0	0	0	0	0	0	0	0	0	0	0	0	0	0	0	0	0	0	0	0	0	0	0	4.19148	0.89	2	2	0	0	0	0	2.02796	0.5	1	1	0	0	0	0	0
A0A023FKA7	Uncharacterized protein (Fragment) OS=Amblyomma cajennense PE=2 SV=1 - [A0A023FKA7_9ACAR]	335	37.0969	6.32861	2	1	1	3	0	0	0	0	0	0	0	0	0	0	0	0	0	0	0	0	0	0	0	0	0	0	0	0	4.22274	4.78	1	2	0	0	0	0	2.14228	4.78	1	1	0	0	0	0	0
A0A131YPN9	FKBP12-rapamycin complex-associated protein OS=Rhipicephalus appendiculatus PE=3 SV=1 - [A0A131YPN9_RHIAP]	2497	283.187	7.54736	10	3	3	3	0	0	0	0	0	0	0	0	0	0	0	0	0	0	0	0	0	0	0	0	0	0	0	0	4.59289	0.88	2	2	0	0	0	0	2.54676	0.68	1	1	0	0	0	0	0
A0A1E1X5R2	Protein kinase essential for the initiation of dna replication (Fragment) OS=Amblyomma aureolatum PE=2 SV=1 - [A0A1E1X5R2_9ACAR]	490	53.7471	8.04541	1	1	1	3	0	0	0	0	0	0	0	0	0	0	0	0	0	0	0	0	0	0	0	0	0	0	0	0	0	0	0	0	6.66085	2.65	1	3	0	0	0	0	0	0	0	0	0
B7PGV6	Putative uncharacterized protein OS=Ixodes scapularis GN=IscW_ISCW004976 PE=4 SV=1 - [B7PGV6_IXOSC]	118	13.2816	8.98291	1	1	1	3	0	0	0	0	0	0	0	0	0	0	0	0	0	0	0	0	0	0	0	0	0	0	0	0	4.28732	8.47	1	2	0	0	0	0	2.03297	8.47	1	1	0	0	0	0	0
B7QA60	D-lactate dehydrogenase, putative (Fragment) OS=Ixodes scapularis GN=IscW_ISCW013290 PE=4 SV=1 - [B7QA60_IXOSC]	492	53.037	6.46826	4	3	3	3	0	0	0	0	0	0	0	0	0	0	0	0	0	0	0	0	0	0	0	0	0	0	0	0	2.16884	2.85	1	1	0	0	0	0	4.15148	5.08	2	2	0	0	0	0	0
contig11639	mitochondrial atp synthase f chain	107	12.5135	9.90576	1	2	2	3	0	0	0	0	0	0	0	0	0	0	0	0	0	0	0	0	0	0	0	0	0	0	0	0	3.17528	9.35	1	1	0	0	0	0	6.1116	21.5	2	2	0	0	0	0	0
G3MIZ1	Uncharacterized protein (Fragment) OS=Amblyomma maculatum PE=2 SV=1 - [G3MIZ1_9ACAR]	401	44.9583	8.47021	1	2	2	3	0	0	0	0	0	0	0	0	0	0	0	0	0	0	0	0	0	0	0	0	0	0	0	0	4.45098	3.99	1	2	2.2197	2.49	1	1	0	0	0	0	0	0	0	0	0
G9NSEKQ01A5VUQ|---NA---	G9NSEKQ01A5VUQ|---NA---	36	4.10017	11.0044	1	1	1	3	0	0	0	0	0	0	0	0	0	0	0	0	0	0	0	0	0	0	0	0	0	0	0	0	0	0	0	0	2.1425	36.11	1	1	2.23536	36.11	1	2	0	0	0	0	0
isotig19573	nuclear receptor-binding protein	496	56.1003	6.43018	1	1	1	3	0	0	0	0	0	0	0	0	0	0	0	0	0	0	0	0	0	0	0	0	0	0	0	0	6.48081	2.22	1	3	0	0	0	0	0	0	0	0	0	0	0	0	0
isotig29648|---NA---	isotig29648|---NA---	170	18.8477	9.21729	1	4	4	12	0	0	0	0	0	0	0	0	0	0	0	0	0	0	0	0	0	0	0	0	0	0	0	0	5.17711	10	2	2	0	0	0	0	0	0	0	0	11.0383	24.12	4	4	7.89176
isotig17135	two thyropin domains protein	161	17.1233	8.36768	1	4	4	9	0	0	0	0	0	0	0	0	0	0	0	0	0	0	0	0	0	0	0	0	0	0	0	0	2.49311	9.32	1	1	0	0	0	0	2.19534	9.32	1	1	8.96708	18.01	3	3	2.2826
A0A131Z3E9	40S ribosomal protein S6 OS=Rhipicephalus appendiculatus PE=3 SV=1 - [A0A131Z3E9_RHIAP]	246	28.2946	10.7554	16	2	2	7	0	0	0	0	0	0	0	0	0	0	0	0	0	0	0	0	0	0	0	0	0	0	0	0	0	0	0	0	0	0	0	0	4.58227	4.88	1	2	7.71454	10.16	2	3	2.57573
A0A1E1XIB9	Putative chromatin modification-related protein meaf6 (Fragment) OS=Amblyomma aureolatum PE=2 SV=1 - [A0A1E1XIB9_9ACAR]	212	22.3371	9.45166	6	1	2	7	0	0	0	0	0	0	0	0	0	0	0	0	0	0	0	0	0	0	0	0	0	0	0	0	2.374	7.08	1	1	0	0	0	0	2.18619	7.08	1	1	4.64174	7.08	1	2	7.01445
A0A1E1X027	Putative lipocalin-3 1 lipocalin (Fragment) OS=Amblyomma aureolatum PE=2 SV=1 - [A0A1E1X027_9ACAR]	198	22.7794	8.646	1	1	1	6	0	0	0	0	0	0	0	0	0	0	0	0	0	0	0	0	0	0	0	0	0	0	0	0	2.06506	6.57	1	1	2.02852	6.57	1	1	0	0	0	0	2.17746	6.57	1	1	2.47966
isotig03886	gamma-interferon inducible lysosomal thiol reductase	176	19.7902	7.95752	1	2	2	6	0	0	0	0	0	0	0	0	0	0	0	0	0	0	0	0	0	0	0	0	0	0	0	0	0	0	0	0	2.05337	5.11	1	1	2.18578	5.11	1	1	4.4426	11.93	2	2	2.22965
isotig16664	cytotoxin-like protein	215	23.062	9.56885	1	1	1	6	0	0	0	0	0	0	0	0	0	0	0	0	0	0	0	0	0	0	0	0	0	0	0	0	2.32806	5.12	1	1	0	0	0	0	2.60943	5.12	1	1	5.59398	5.12	1	2	0
isotig18988	probable serine carboxypeptidase cpvl-like	470	53.3764	8.68994	1	3	3	6	0	0	0	0	0	0	0	0	0	0	0	0	0	0	0	0	0	0	0	0	0	0	0	0	5.74984	5.32	2	2	0	0	0	0	0	0	0	0	5.68251	4.47	2	2	2.7157
L7M599	Mitogen-activated protein kinase OS=Rhipicephalus pulchellus PE=2 SV=1 - [L7M599_9ACAR]	355	40.4675	6.31592	31	1	2	6	0	0	0	0	0	0	0	0	0	0	0	0	0	0	0	0	0	0	0	0	0	0	0	0	4.74087	2.25	1	2	0	0	0	0	0	0	0	0	2.40309	2.25	1	1	2.30906
L7MCR5	Putative nucleolar pre-ribosomal-associated protein 1 (Fragment) OS=Rhipicephalus pulchellus PE=2 SV=1 - [L7MCR5_9ACAR]	2103	236.815	6.80029	2	2	2	6	0	0	0	0	0	0	0	0	0	0	0	0	0	0	0	0	0	0	0	0	0	0	0	0	5.05313	1.43	2	2	0	0	0	0	0	0	0	0	4.99248	0.71	1	2	2.31991
B7PAU5	Prominin protein, putative OS=Ixodes scapularis GN=IscW_ISCW017303 PE=4 SV=1 - [B7PAU5_IXOSC]	690	75.049	6.03662	3	2	2	5	0	0	0	0	0	0	0	0	0	0	0	0	0	0	0	0	0	0	0	0	0	0	0	0	2.17116	1.3	1	1	2.38752	1.3	1	1	0	0	0	0	4.55557	3.33	2	2	2.38082
G3MGR2	Uncharacterized protein (Fragment) OS=Amblyomma maculatum PE=2 SV=1 - [G3MGR2_9ACAR]	211	22.8651	9.34912	1	1	1	5	0	0	0	0	0	0	0	0	0	0	0	0	0	0	0	0	0	0	0	0	0	0	0	0	2.12126	6.64	1	1	2.27538	6.64	1	1	0	0	0	0	0	0	0	0	4.40635
isotig09577	PREDICTED: uncharacterized protein LOC100908929	201	22.2495	6.66846	1	2	2	5	0	0	0	0	0	0	0	0	0	0	0	0	0	0	0	0	0	0	0	0	0	0	0	0	5.09541	7.46	1	2	0	0	0	0	0	0	0	0	8.75199	13.43	2	3	0
A0A0E9Y1L5	Serine protease inhibitor (Fragment) OS=Amblyomma americanum PE=3 SV=1 - [A0A0E9Y1L5_AMBAM]	113	12.2692	6.68311	1	1	1	4	0	0	0	0	0	0	0	0	0	0	0	0	0	0	0	0	0	0	0	0	0	0	0	0	4.70386	14.16	1	2	0	0	0	0	0	0	0	0	4.51521	14.16	1	2	0
A0A131Y3B5	Putative rho-associated coiled-coil (Fragment) OS=Ixodes ricinus PE=2 SV=1 - [A0A131Y3B5_IXORI]	1524	173.677	6.58057	5	1	3	4	0	0	0	0	0	0	0	0	0	0	0	0	0	0	0	0	0	0	0	0	0	0	0	0	2.05989	0.85	1	1	0	0	0	0	2.02773	1.05	1	1	2.20625	0.85	1	2	0
A0A131YL89	Peptide chain release factor 1 OS=Rhipicephalus appendiculatus PE=4 SV=1 - [A0A131YL89_RHIAP]	310	34.8009	8.51416	1	1	1	4	0	0	0	0	0	0	0	0	0	0	0	0	0	0	0	0	0	0	0	0	0	0	0	0	2.05515	4.84	1	2	0	0	0	0	0	0	0	0	4.38932	4.84	1	2	0
B7PPS1	Glycogen [starch] synthase OS=Ixodes scapularis GN=IscW_ISCW006570 PE=3 SV=1 - [B7PPS1_IXOSC]	642	73.0625	6.49365	12	3	3	4	0	0	0	0	0	0	0	0	0	0	0	0	0	0	0	0	0	0	0	0	0	0	0	0	4.21642	3.74	2	2	0	0	0	0	0	0	0	0	2.08399	1.25	1	1	0
A0A023GDD7	AP-3 complex subunit delta OS=Amblyomma triste PE=2 SV=1 - [A0A023GDD7_9ACAR]	907	101.754	7.53271	6	1	2	3	0	0	0	0	0	0	0	0	0	0	0	0	0	0	0	0	0	0	0	0	0	0	0	0	0	0	0	0	0	0	0	0	4.15267	1.43	1	2	2.01818	1.43	1	1	0
A0A023GLW2	Putative atp-dependent rna helicase (Fragment) OS=Amblyomma triste PE=2 SV=1 - [A0A023GLW2_9ACAR]	395	45.1003	5.84619	2	2	3	3	0	0	0	0	0	0	0	0	0	0	0	0	0	0	0	0	0	0	0	0	0	0	0	0	4.2402	4.56	2	2	0	0	0	0	0	0	0	0	2.82718	3.8	1	1	0
A0A131XME7	Putative 26s proteasome regulatory complex subunit rpn2/psmd1 OS=Hyalomma excavatum PE=2 SV=1 - [A0A131XME7_9ACAR]	1019	110.972	5.42725	7	2	2	3	0	0	0	0	0	0	0	0	0	0	0	0	0	0	0	0	0	0	0	0	0	0	0	0	4.25574	2.55	2	2	0	0	0	0	0	0	0	0	0	0	0	0	0
A0A147BFP1	Putative mucin-2-like protein (Fragment) OS=Ixodes ricinus PE=4 SV=1 - [A0A147BFP1_IXORI]	1552	171.308	9.26123	1	2	2	3	0	0	0	0	0	0	0	0	0	0	0	0	0	0	0	0	0	0	0	0	0	0	0	0	0	0	0	0	0	0	0	0	4.11003	1.68	2	2	0	0	0	0	2.19376
A0A147BIG1	Putative crack-1 is transposable element (Fragment) OS=Ixodes ricinus PE=4 SV=1 - [A0A147BIG1_IXORI]	205	24.0857	9.48096	1	1	1	3	0	0	0	0	0	0	0	0	0	0	0	0	0	0	0	0	0	0	0	0	0	0	0	0	4.57023	7.8	1	2	0	0	0	0	0	0	0	0	2.045	7.8	1	1	0
A0A1E1X8B2	Putative monoacylglycerol lipase abhd12-like isoform 2 (Fragment) OS=Amblyomma aureolatum PE=2 SV=1 - [A0A1E1X8B2_9ACAR]	380	41.8611	9.29053	2	1	1	3	0	0	0	0	0	0	0	0	0	0	0	0	0	0	0	0	0	0	0	0	0	0	0	0	4.54587	3.95	1	2	0	0	0	0	0	0	0	0	0	0	0	0	2.0534
A0A1E1XG26	Putative ccaat-binding factor subunit a hap3 OS=Amblyomma aureolatum PE=2 SV=1 - [A0A1E1XG26_9ACAR]	202	21.9736	4.52588	1	1	1	3	0	0	0	0	0	0	0	0	0	0	0	0	0	0	0	0	0	0	0	0	0	0	0	0	4.59968	8.42	1	2	0	0	0	0	0	0	0	0	2.25723	8.42	1	1	0
A0A1E1XRL3	Putative mrna splicing factor (Fragment) OS=Amblyomma sculptum PE=2 SV=1 - [A0A1E1XRL3_9ACAR]	717	78.4751	6.7124	1	1	1	3	0	0	0	0	0	0	0	0	0	0	0	0	0	0	0	0	0	0	0	0	0	0	0	0	4.2242	1.95	1	2	0	0	0	0	0	0	0	0	0	0	0	0	2.04916
B7PT24	Putative uncharacterized protein OS=Ixodes scapularis GN=IscW_ISCW007006 PE=4 SV=1 - [B7PT24_IXOSC]	634	66.7786	5.92236	1	1	2	3	0	0	0	0	0	0	0	0	0	0	0	0	0	0	0	0	0	0	0	0	0	0	0	0	4.12804	3.63	2	2	0	0	0	0	0	0	0	0	2.04768	2.21	1	1	0
G3MJG2	Uncharacterized protein (Fragment) OS=Amblyomma maculatum PE=2 SV=1 - [G3MJG2_9ACAR]	507	54.744	7.15186	1	1	1	3	0	0	0	0	0	0	0	0	0	0	0	0	0	0	0	0	0	0	0	0	0	0	0	0	0	0	0	0	2.24972	2.37	1	2	0	0	0	0	0	0	0	0	0
isotig15881	PREDICTED: uncharacterized protein LOC100899789	275	28.6809	4.28467	1	1	1	3	0	0	0	0	0	0	0	0	0	0	0	0	0	0	0	0	0	0	0	0	0	0	0	0	0	0	0	0	0	0	0	0	5.25322	4	1	2	0	0	0	0	0
L7M9D0	Putative secreted peptide OS=Rhipicephalus pulchellus PE=2 SV=1 - [L7M9D0_9ACAR]	80	8.7952	7.60596	1	1	1	3	0	0	0	0	0	0	0	0	0	0	0	0	0	0	0	0	0	0	0	0	0	0	0	0	2.05563	20	1	2	0	0	0	0	0	0	0	0	0	0	0	0	0
A0A023FEM5	Putative kazal-type serine protease inhibitor domain protein (Fragment) OS=Amblyomma cajennense PE=2 SV=1 - [A0A023FEM5_9ACAR]	181	19.2234	8.06006	5	1	1	2	0	0	0	0	0	0	0	0	0	0	0	0	0	0	0	0	0	0	0	0	0	0	0	0	4.25097	8.29	1	2	0	0	0	0	0	0	0	0	0	0	0	0	0
A0A023FQZ6	Putative lipocal-1 1 OS=Amblyomma cajennense PE=2 SV=1 - [A0A023FQZ6_9ACAR]	214	24.8248	9.39307	1	1	1	2	0	0	0	0	0	0	0	0	0	0	0	0	0	0	0	0	0	0	0	0	0	0	0	0	4.23234	7.01	1	2	0	0	0	0	0	0	0	0	0	0	0	0	0
A0A023FVA8	Putative atp OS=Amblyomma parvum PE=2 SV=1 - [A0A023FVA8_9ACAR]	377	41.8478	6.48096	1	1	1	2	0	0	0	0	0	0	0	0	0	0	0	0	0	0	0	0	0	0	0	0	0	0	0	0	4.53209	3.71	1	2	0	0	0	0	0	0	0	0	0	0	0	0	0
A0A023G327	Putative secreted protein OS=Amblyomma parvum PE=2 SV=1 - [A0A023G327_9ACAR]	425	47.09	8.30908	1	1	1	2	0	0	0	0	0	0	0	0	0	0	0	0	0	0	0	0	0	0	0	0	0	0	0	0	4.34609	3.53	1	2	0	0	0	0	0	0	0	0	0	0	0	0	0
A0A023GCD2	Putative actin-related protein (Fragment) OS=Amblyomma triste PE=2 SV=1 - [A0A023GCD2_9ACAR]	338	37.556	6.37939	2	2	2	2	0	0	0	0	0	0	0	0	0	0	0	0	0	0	0	0	0	0	0	0	0	0	0	0	4.23379	7.99	2	2	0	0	0	0	0	0	0	0	0	0	0	0	0
A0A090XBY6	Putative c1a receptor (Fragment) OS=Ixodes ricinus PE=2 SV=1 - [A0A090XBY6_IXORI]	387	43.0543	8.25049	4	1	1	2	0	0	0	0	0	0	0	0	0	0	0	0	0	0	0	0	0	0	0	0	0	0	0	0	0	0	0	0	2.69799	3.62	1	2	0	0	0	0	0	0	0	0	0
A0A0C9R363	Putative rna helicase OS=Amblyomma americanum PE=2 SV=1 - [A0A0C9R363_AMBAM]	487	54.8309	5.30029	8	1	2	2	0	0	0	0	0	0	0	0	0	0	0	0	0	0	0	0	0	0	0	0	0	0	0	0	0	0	0	0	0	0	0	0	4.25564	4.72	2	2	0	0	0	0	0
A0A0K8RJB0	Uncharacterized protein OS=Ixodes ricinus PE=2 SV=1 - [A0A0K8RJB0_IXORI]	1783	209.344	6.80029	1	2	2	2	0	0	0	0	0	0	0	0	0	0	0	0	0	0	0	0	0	0	0	0	0	0	0	0	4.0106	1.85	2	2	0	0	0	0	0	0	0	0	0	0	0	0	0
A0A0K8RNY6	Putative isac anti-complement (Fragment) OS=Ixodes ricinus PE=2 SV=1 - [A0A0K8RNY6_IXORI]	176	19.1226	8.92432	2	1	1	2	0	0	0	0	0	0	0	0	0	0	0	0	0	0	0	0	0	0	0	0	0	0	0	0	4.20917	7.95	1	2	0	0	0	0	0	0	0	0	0	0	0	0	0
A0A0K8RS59	Putative peptidase family m13 includes neprilysin (Fragment) OS=Ixodes ricinus PE=2 SV=1 - [A0A0K8RS59_IXORI]	293	33.9597	5.22412	1	1	1	2	0	0	0	0	0	0	0	0	0	0	0	0	0	0	0	0	0	0	0	0	0	0	0	0	4.1074	3.75	1	2	0	0	0	0	0	0	0	0	0	0	0	0	0
A0A131XL40	Putative gypsy-24 xt-i (Fragment) OS=Hyalomma excavatum PE=2 SV=1 - [A0A131XL40_9ACAR]	1128	125.26	8.57275	1	1	1	2	0	0	0	0	0	0	0	0	0	0	0	0	0	0	0	0	0	0	0	0	0	0	0	0	5.48991	1.06	1	2	0	0	0	0	0	0	0	0	0	0	0	0	0
A0A131XMG2	Putative metalloprotease (Fragment) OS=Hyalomma excavatum PE=2 SV=1 - [A0A131XMG2_9ACAR]	513	56.6983	6.90283	1	1	1	2	0	0	0	0	0	0	0	0	0	0	0	0	0	0	0	0	0	0	0	0	0	0	0	0	0	0	0	0	4.17699	1.95	1	2	0	0	0	0	0	0	0	0	0
A0A131YDF7	Mucin OS=Rhipicephalus appendiculatus PE=4 SV=1 - [A0A131YDF7_RHIAP]	1455	158.027	4.97021	3	1	1	2	0	0	0	0	0	0	0	0	0	0	0	0	0	0	0	0	0	0	0	0	0	0	0	0	0	0	0	0	0	0	0	0	4.64086	0.82	1	2	0	0	0	0	0
A0A131YE73	Uncharacterized protein OS=Rhipicephalus appendiculatus PE=4 SV=1 - [A0A131YE73_RHIAP]	101	11.7069	8.03076	1	1	1	2	0	0	0	0	0	0	0	0	0	0	0	0	0	0	0	0	0	0	0	0	0	0	0	0	4.1996	15.84	1	2	0	0	0	0	0	0	0	0	0	0	0	0	0
A0A131YFH7	Uncharacterized protein OS=Rhipicephalus appendiculatus PE=4 SV=1 - [A0A131YFH7_RHIAP]	83	9.12329	7.63525	1	1	1	2	0	0	0	0	0	0	0	0	0	0	0	0	0	0	0	0	0	0	0	0	0	0	0	0	4.42371	18.07	1	2	0	0	0	0	0	0	0	0	0	0	0	0	0
A0A131YRH0	Sallimus OS=Rhipicephalus appendiculatus PE=4 SV=1 - [A0A131YRH0_RHIAP]	1704	189.472	5.16064	1	1	1	2	0	0	0	0	0	0	0	0	0	0	0	0	0	0	0	0	0	0	0	0	0	0	0	0	4.29989	0.7	1	2	0	0	0	0	0	0	0	0	0	0	0	0	0
A0A131YTN2	Microplusin OS=Rhipicephalus appendiculatus PE=4 SV=1 - [A0A131YTN2_RHIAP]	105	11.1858	5.5542	1	1	1	2	0	0	0	0	0	0	0	0	0	0	0	0	0	0	0	0	0	0	0	0	0	0	0	0	0	0	0	0	0	0	0	0	4.26984	14.29	1	2	0	0	0	0	0
A0A131YU84	Transformation/transcription domain-associated protein OS=Rhipicephalus appendiculatus PE=4 SV=1 - [A0A131YU84_RHIAP]	118	12.6924	7.38623	1	1	1	2	0	0	0	0	0	0	0	0	0	0	0	0	0	0	0	0	0	0	0	0	0	0	0	0	2.45536	16.1	1	2	0	0	0	0	0	0	0	0	0	0	0	0	0
A0A131Z0J8	Pancreatic trypsin inhibitor OS=Rhipicephalus appendiculatus PE=4 SV=1 - [A0A131Z0J8_RHIAP]	212	24.4352	8.41162	1	2	2	2	0	0	0	0	0	0	0	0	0	0	0	0	0	0	0	0	0	0	0	0	0	0	0	0	4.29837	15.09	2	2	0	0	0	0	0	0	0	0	0	0	0	0	0
A0A147BET5	Putative secreted protein OS=Ixodes ricinus PE=4 SV=1 - [A0A147BET5_IXORI]	196	20.2298	9.17334	2	2	2	2	0	0	0	0	0	0	0	0	0	0	0	0	0	0	0	0	0	0	0	0	0	0	0	0	0	0	0	0	0	0	0	0	4.3881	11.73	2	2	0	0	0	0	0
A0A147BJ16	Putative monocarboxylate transporter (Fragment) OS=Ixodes ricinus PE=4 SV=1 - [A0A147BJ16_IXORI]	453	48.7397	8.55811	1	1	1	2	0	0	0	0	0	0	0	0	0	0	0	0	0	0	0	0	0	0	0	0	0	0	0	0	0	0	0	0	0	0	0	0	4.17742	1.99	1	2	0	0	0	0	0
A0A1D2AII6	Uncharacterized protein (Fragment) OS=Ornithodoros brasiliensis PE=4 SV=1 - [A0A1D2AII6_ORNBR]	240	26.7565	9.39307	1	1	1	2	0	0	0	0	0	0	0	0	0	0	0	0	0	0	0	0	0	0	0	0	0	0	0	0	4.23775	5.42	1	2	0	0	0	0	0	0	0	0	0	0	0	0	0
A0A1E1XBP3	Uncharacterized protein (Fragment) OS=Amblyomma aureolatum PE=2 SV=1 - [A0A1E1XBP3_9ACAR]	402	44.1838	6.40479	1	1	1	2	0	0	0	0	0	0	0	0	0	0	0	0	0	0	0	0	0	0	0	0	0	0	0	0	5.00911	3.98	1	2	0	0	0	0	0	0	0	0	0	0	0	0	0
A0A1E1XF36	Putative abc transporter (Fragment) OS=Amblyomma aureolatum PE=2 SV=1 - [A0A1E1XF36_9ACAR]	592	65.9723	8.44092	1	1	1	2	0	0	0	0	0	0	0	0	0	0	0	0	0	0	0	0	0	0	0	0	0	0	0	0	2.54309	2.7	1	2	0	0	0	0	0	0	0	0	0	0	0	0	0
A0A1E1XKR0	Putative tgfbeta receptor signaling protein smad (Fragment) OS=Amblyomma sculptum PE=2 SV=1 - [A0A1E1XKR0_9ACAR]	228	25.5678	8.30908	2	1	1	2	0	0	0	0	0	0	0	0	0	0	0	0	0	0	0	0	0	0	0	0	0	0	0	0	2.03635	7.02	1	2	0	0	0	0	0	0	0	0	0	0	0	0	0
A0A1E1XV64	Putative tor signaling pathway regulator-like protein OS=Amblyomma sculptum PE=2 SV=1 - [A0A1E1XV64_9ACAR]	273	31.5595	5.80811	2	1	1	2	0	0	0	0	0	0	0	0	0	0	0	0	0	0	0	0	0	0	0	0	0	0	0	0	2.33931	5.86	1	2	0	0	0	0	0	0	0	0	0	0	0	0	0
B7P5H9	Serine-type enodpeptidase, putative OS=Ixodes scapularis GN=IscW_ISCW000365 PE=4 SV=1 - [B7P5H9_IXOSC]	191	20.1102	6.771	1	1	1	2	0	0	0	0	0	0	0	0	0	0	0	0	0	0	0	0	0	0	0	0	0	0	0	0	0	0	0	0	4.17196	6.81	1	2	0	0	0	0	0	0	0	0	0
B7P968	Helicase, putative OS=Ixodes scapularis GN=IscW_ISCW003078 PE=4 SV=1 - [B7P968_IXOSC]	216	24.7887	7.86963	12	1	2	2	0	0	0	0	0	0	0	0	0	0	0	0	0	0	0	0	0	0	0	0	0	0	0	0	4.14556	9.26	2	2	0	0	0	0	0	0	0	0	0	0	0	0	0
B7PA70	Heterotrimeric G protein alpha subunit B, putative (Fragment) OS=Ixodes scapularis GN=IscW_ISCW017464 PE=4 SV=1 - [B7PA70_IXOSC]	314	36.2288	5.47803	3	1	1	2	0	0	0	0	0	0	0	0	0	0	0	0	0	0	0	0	0	0	0	0	0	0	0	0	4.88568	3.5	1	2	0	0	0	0	0	0	0	0	0	0	0	0	0
B7PHJ6	N-acetyllactosaminide beta-1,3-N-acetylglucosaminyltransferase, putative OS=Ixodes scapularis GN=IscW_ISCW004573 PE=4 SV=1 - [B7PHJ6_IXOSC]	341	39.0599	9.12939	1	1	1	2	0	0	0	0	0	0	0	0	0	0	0	0	0	0	0	0	0	0	0	0	0	0	0	0	0	0	0	0	0	0	0	0	4.56741	4.4	1	2	0	0	0	0	0
B7PJ23	PiggyBac transposable element-derived protein, putative OS=Ixodes scapularis GN=IscW_ISCW004201 PE=4 SV=1 - [B7PJ23_IXOSC]	379	43.0798	8.41162	1	1	2	2	0	0	0	0	0	0	0	0	0	0	0	0	0	0	0	0	0	0	0	0	0	0	0	0	0	0	0	0	4.22348	5.8	2	2	0	0	0	0	0	0	0	0	0
B7Q2J8	Putative uncharacterized protein OS=Ixodes scapularis GN=IscW_ISCW009018 PE=4 SV=1 - [B7Q2J8_IXOSC]	107	11.9509	8.41162	1	1	1	2	0	0	0	0	0	0	0	0	0	0	0	0	0	0	0	0	0	0	0	0	0	0	0	0	4.06362	14.02	1	2	0	0	0	0	0	0	0	0	0	0	0	0	0
B7Q4F1	F-box and WD domain protein, putative OS=Ixodes scapularis GN=IscW_ISCW021442 PE=4 SV=1 - [B7Q4F1_IXOSC]	421	45.367	6.27783	2	1	1	2	0	0	0	0	0	0	0	0	0	0	0	0	0	0	0	0	0	0	0	0	0	0	0	0	0	0	0	0	4.0467	2.61	1	2	0	0	0	0	0	0	0	0	0
B7QGN3	Alkaline phosphatase (Fragment) OS=Ixodes scapularis GN=IscW_ISCW023785 PE=3 SV=1 - [B7QGN3_IXOSC]	513	55.6709	6.62451	1	1	1	2	0	0	0	0	0	0	0	0	0	0	0	0	0	0	0	0	0	0	0	0	0	0	0	0	0	0	0	0	4.45588	2.53	1	2	0	0	0	0	0	0	0	0	0
B7QMH5	Putative uncharacterized protein OS=Ixodes scapularis GN=IscW_ISCW023190 PE=4 SV=1 - [B7QMH5_IXOSC]	310	32.7432	8.63135	1	1	1	2	0	0	0	0	0	0	0	0	0	0	0	0	0	0	0	0	0	0	0	0	0	0	0	0	4.34822	4.84	1	2	0	0	0	0	0	0	0	0	0	0	0	0	0
G3MGD8	Uncharacterized protein (Fragment) OS=Amblyomma maculatum PE=2 SV=1 - [G3MGD8_9ACAR]	382	42.6367	9.5542	1	1	1	2	0	0	0	0	0	0	0	0	0	0	0	0	0	0	0	0	0	0	0	0	0	0	0	0	4.59228	3.66	1	2	0	0	0	0	0	0	0	0	0	0	0	0	0
G3MHM0	Uncharacterized protein (Fragment) OS=Amblyomma maculatum PE=2 SV=1 - [G3MHM0_9ACAR]	245	27.3093	7.02002	1	1	1	2	0	0	0	0	0	0	0	0	0	0	0	0	0	0	0	0	0	0	0	0	0	0	0	0	4.24612	6.53	1	2	0	0	0	0	0	0	0	0	0	0	0	0	0
G9NSEKQ02GD6BC|---NA---	G9NSEKQ02GD6BC|---NA---	58	6.28025	8.86572	1	1	1	2	0	0	0	0	0	0	0	0	0	0	0	0	0	0	0	0	0	0	0	0	0	0	0	0	4.2163	22.41	1	2	0	0	0	0	0	0	0	0	0	0	0	0	0
isotig09881	sulfhydryl oxidase 1-like	462	52.2979	7.40088	2	1	1	2	0	0	0	0	0	0	0	0	0	0	0	0	0	0	0	0	0	0	0	0	0	0	0	0	0	0	0	0	0	0	0	0	4.57382	2.16	1	2	0	0	0	0	0
isotig10360	7 transmembrane	259	29.6093	8.73389	1	1	1	2	0	0	0	0	0	0	0	0	0	0	0	0	0	0	0	0	0	0	0	0	0	0	0	0	4.57295	5.41	1	2	0	0	0	0	0	0	0	0	0	0	0	0	0
isotig18984	cytochrome heme mitochondrial-like	309	33.9562	7.45947	1	2	2	2	0	0	0	0	0	0	0	0	0	0	0	0	0	0	0	0	0	0	0	0	0	0	0	0	5.52334	7.44	2	2	0	0	0	0	0	0	0	0	0	0	0	0	0
L7LZ52	Uncharacterized protein OS=Rhipicephalus pulchellus PE=2 SV=1 - [L7LZ52_9ACAR]	689	78.0394	8.26514	1	1	1	2	0	0	0	0	0	0	0	0	0	0	0	0	0	0	0	0	0	0	0	0	0	0	0	0	0	0	0	0	0	0	0	0	4.26277	1.89	1	2	0	0	0	0	0
V5GUF7	Putative regulation of small gtpase mediated signal transduction (Fragment) OS=Ixodes ricinus PE=2 SV=1 - [V5GUF7_IXORI]	745	81.4165	6.63916	4	1	1	2	0	0	0	0	0	0	0	0	0	0	0	0	0	0	0	0	0	0	0	0	0	0	0	0	0	0	0	0	0	0	0	0	4.23332	1.07	1	2	0	0	0	0	0
V5H516	Putative acetyl-coa carboxylase OS=Ixodes ricinus PE=2 SV=1 - [V5H516_IXORI]	1720	195.019	6.07471	5	1	2	2	0	0	0	0	0	0	0	0	0	0	0	0	0	0	0	0	0	0	0	0	0	0	0	0	4.17641	1.45	2	2	0	0	0	0	0	0	0	0	0	0	0	0	0
V5HR84	Putative trypsin-like serine protease (Fragment) OS=Ixodes ricinus PE=2 SV=1 - [V5HR84_IXORI]	173	19.2446	7.79639	2	1	1	2	0	0	0	0	0	0	0	0	0	0	0	0	0	0	0	0	0	0	0	0	0	0	0	0	2.09533	6.94	1	2	0	0	0	0	0	0	0	0	0	0	0	0	0
isotig16381	cathepsin l-like	339	37.4155	8.11865	1	4	4	11	0	0	0	0	0	0	0	0	0	0	0	0	0	0	0	0	0	0	0	0	0	0	0	0	2.56867	2.95	1	1	0	0	0	0	0	0	0	0	5.13501	6.19	2	2	10.5471
isotig28514	PREDICTED: uncharacterized protein LOC100906062	160	17.0916	5.60498	1	4	4	10	0	0	0	0	0	0	0	0	0	0	0	0	0	0	0	0	0	0	0	0	0	0	0	0	2.16399	9.38	1	1	0	0	0	0	0	0	0	0	10.3083	17.5	2	3	8.47304
A0A147BK98	Putative pol polyprotein (Fragment) OS=Ixodes ricinus PE=4 SV=1 - [A0A147BK98_IXORI]	1032	115.362	9.5249	1	2	2	6	0	0	0	0	0	0	0	0	0	0	0	0	0	0	0	0	0	0	0	0	0	0	0	0	0	0	0	0	0	0	0	0	2.19817	0.87	1	1	4.67122	1.36	1	2	2.19698
A0A1E1XDL7	Putative o-linked n-acetylglucosamine transferase ogt OS=Amblyomma aureolatum PE=2 SV=1 - [A0A1E1XDL7_9ACAR]	434	48.5506	6.59521	1	3	3	6	0	0	0	0	0	0	0	0	0	0	0	0	0	0	0	0	0	0	0	0	0	0	0	0	0	0	0	0	2.2547	2.76	1	1	0	0	0	0	4.38111	2.76	2	2	2.28963
B7PM08	eIF2-interacting protein ABC50, putative (Fragment) OS=Ixodes scapularis GN=IscW_ISCW006228 PE=4 SV=1 - [B7PM08_IXOSC]	387	44.1649	7.78174	11	1	1	6	0	0	0	0	0	0	0	0	0	0	0	0	0	0	0	0	0	0	0	0	0	0	0	0	2.25473	2.58	1	1	0	0	0	0	0	0	0	0	2.44944	2.58	1	1	2.37771
G3MT79	Uncharacterized protein OS=Amblyomma maculatum PE=2 SV=1 - [G3MT79_9ACAR]	128	14.8801	10.8726	13	1	2	6	0	0	0	0	0	0	0	0	0	0	0	0	0	0	0	0	0	0	0	0	0	0	0	0	2.32718	7.81	1	1	0	0	0	0	0	0	0	0	2.60914	7.81	1	1	4.68666
isotig18321	vacuolar h	335	36.9488	5.32568	1	1	1	6	0	0	0	0	0	0	0	0	0	0	0	0	0	0	0	0	0	0	0	0	0	0	0	0	2.64966	5.07	1	1	0	0	0	0	0	0	0	0	2.71607	5.07	1	1	7.17093
A0A0K8RQ64	Putative 40s ribosomal protein s11 (Fragment) OS=Ixodes ricinus PE=2 SV=1 - [A0A0K8RQ64_IXORI]	153	17.7375	10.3159	3	1	2	5	0	0	0	0	0	0	0	0	0	0	0	0	0	0	0	0	0	0	0	0	0	0	0	0	2.32718	6.54	1	1	0	0	0	0	0	0	0	0	2.60914	6.54	1	1	5.09384
A0A131XMT0	Chloride channel protein (Fragment) OS=Ixodes ricinus PE=2 SV=1 - [A0A131XMT0_IXORI]	924	102.987	9.31982	1	1	1	5	0	0	0	0	0	0	0	0	0	0	0	0	0	0	0	0	0	0	0	0	0	0	0	0	0	0	0	0	0	0	0	0	2.04251	1.52	1	1	2.44199	1.52	1	1	2.41179
isotig15459	rna-dependent rna polymerase	981	108.75	8.04541	2	2	2	5	0	0	0	0	0	0	0	0	0	0	0	0	0	0	0	0	0	0	0	0	0	0	0	0	5.03802	1.63	1	1	0	0	0	0	0	0	0	0	0	0	0	0	0
A0A090XC82	Putative 60s ribosomal protein (Fragment) OS=Ixodes ricinus PE=2 SV=1 - [A0A090XC82_IXORI]	280	31.6985	9.979	6	1	1	4	0	0	0	0	0	0	0	0	0	0	0	0	0	0	0	0	0	0	0	0	0	0	0	0	4.42761	6.43	1	1	0	0	0	0	0	0	0	0	11.5954	6.43	1	3	0
A0A131XF80	alpha-1,2-Mannosidase OS=Hyalomma excavatum PE=2 SV=1 - [A0A131XF80_9ACAR]	637	71.9137	7.40088	2	1	1	4	0	0	0	0	0	0	0	0	0	0	0	0	0	0	0	0	0	0	0	0	0	0	0	0	2.09067	1.88	1	1	0	0	0	0	0	0	0	0	2.24069	1.88	1	1	0
A0A131Y3B6	Putative myosin heavy polypeptide 9 (Fragment) OS=Ixodes ricinus PE=2 SV=1 - [A0A131Y3B6_IXORI]	258	29.1238	6.27783	1	1	1	4	0	0	0	0	0	0	0	0	0	0	0	0	0	0	0	0	0	0	0	0	0	0	0	0	2.11197	4.26	1	1	0	0	0	0	0	0	0	0	2.02068	4.26	1	1	4.40048
A0A131YK73	Kelch repeat containing protein OS=Rhipicephalus appendiculatus PE=4 SV=1 - [A0A131YK73_RHIAP]	1477	161.952	5.19873	1	1	2	4	0	0	0	0	0	0	0	0	0	0	0	0	0	0	0	0	0	0	0	0	0	0	0	0	2.17964	0.47	1	1	0	0	0	0	0	0	0	0	4.63413	1.35	2	2	0
A0A131YPS5	Acetyltransferase component of pyruvate dehydrogenase complex OS=Rhipicephalus appendiculatus PE=3 SV=1 - [A0A131YPS5_RHIAP]	494	52.8448	9.02686	2	1	3	4	0	0	0	0	0	0	0	0	0	0	0	0	0	0	0	0	0	0	0	0	0	0	0	0	2.36667	3.24	1	1	0	0	0	0	0	0	0	0	6.32055	4.45	2	3	0
A0A1E1WZ59	Putative 40s ribosomal protein s15a OS=Amblyomma aureolatum PE=2 SV=1 - [A0A1E1WZ59_9ACAR]	130	14.887	10.1841	11	2	2	4	0	0	0	0	0	0	0	0	0	0	0	0	0	0	0	0	0	0	0	0	0	0	0	0	2.13538	6.15	1	1	0	0	0	0	0	0	0	0	4.33273	15.38	2	2	2.0543
A0A1E1XBB1	Anoctamin OS=Amblyomma aureolatum PE=2 SV=1 - [A0A1E1XBB1_9ACAR]	862	98.5698	7.32764	3	1	1	4	0	0	0	0	0	0	0	0	0	0	0	0	0	0	0	0	0	0	0	0	0	0	0	0	3.33925	1.62	1	1	0	0	0	0	0	0	0	0	4.25825	1.62	1	2	2.10983
G3MTL9	Uncharacterized protein OS=Amblyomma maculatum PE=2 SV=1 - [G3MTL9_9ACAR]	120	13.9495	10.6968	2	2	2	4	0	0	0	0	0	0	0	0	0	0	0	0	0	0	0	0	0	0	0	0	0	0	0	0	0	0	0	0	0	0	0	0	2.01223	10	1	1	4.23974	15.83	2	2	0
isotig03400|---NA---	isotig03400|---NA---	222	23.7967	5.70654	5	2	2	4	0	0	0	0	0	0	0	0	0	0	0	0	0	0	0	0	0	0	0	0	0	0	0	0	0	0	0	0	0	0	0	0	2.25802	4.95	1	1	4.33072	5.41	1	2	2.41947
isotig10783	heat shock protein 67b2-like	110	12.1462	8.70459	2	2	2	4	0	0	0	0	0	0	0	0	0	0	0	0	0	0	0	0	0	0	0	0	0	0	0	0	2.24224	9.09	1	1	0	0	0	0	0	0	0	0	2.72203	9.09	1	1	0
isotig10860	60s acidic ribosomal protein	192	20.5241	4.67822	1	1	1	4	0	0	0	0	0	0	0	0	0	0	0	0	0	0	0	0	0	0	0	0	0	0	0	0	3.2266	8.33	1	1	0	0	0	0	0	0	0	0	8.33927	8.33	1	3	0
L7MD54	tRNA (guanine(26)-N(2))-dimethyltransferase (Fragment) OS=Rhipicephalus pulchellus PE=2 SV=1 - [L7MD54_9ACAR]	560	62.2589	8.89502	5	2	2	4	0	0	0	0	0	0	0	0	0	0	0	0	0	0	0	0	0	0	0	0	0	0	0	0	0	0	0	0	0	0	0	0	2.1126	2.5	1	1	4.33353	5	2	2	0
A0A023FX93	Putative adaptor complexes medium subunit family OS=Amblyomma parvum PE=2 SV=1 - [A0A023FX93_9ACAR]	435	49.82	9.49561	16	1	2	3	0	0	0	0	0	0	0	0	0	0	0	0	0	0	0	0	0	0	0	0	0	0	0	0	0	0	0	0	2.02698	2.07	1	1	0	0	0	0	4.51506	4.37	2	2	0
A0A131YBX9	Myosin viia and rab OS=Rhipicephalus appendiculatus PE=4 SV=1 - [A0A131YBX9_RHIAP]	921	103.354	5.42725	11	3	3	3	0	0	0	0	0	0	0	0	0	0	0	0	0	0	0	0	0	0	0	0	0	0	0	0	2.02374	1.3	1	1	0	0	0	0	0	0	0	0	0	0	0	0	0
A0A131YG35	Basic tail secreted protein OS=Rhipicephalus appendiculatus PE=4 SV=1 - [A0A131YG35_RHIAP]	193	21.9423	9.90576	1	1	1	3	0	0	0	0	0	0	0	0	0	0	0	0	0	0	0	0	0	0	0	0	0	0	0	0	0	0	0	0	2.14341	3.63	1	1	0	0	0	0	0	0	0	0	4.1517
B7SP26	Superoxide dismutase [Cu-Zn] OS=Dermacentor variabilis GN=SOD PE=2 SV=1 - [B7SP26_DERVA]	152	15.6518	7.32764	5	1	1	3	0	0	0	0	0	0	0	0	0	0	0	0	0	0	0	0	0	0	0	0	0	0	0	0	2.67591	8.55	1	1	0	0	0	0	0	0	0	0	5.31399	8.55	1	2	0
G9NSEKQ02GG4PH|---NA---	G9NSEKQ02GG4PH|---NA---	58	6.52804	4.42432	1	1	1	3	0	0	0	0	0	0	0	0	0	0	0	0	0	0	0	0	0	0	0	0	0	0	0	0	2.22938	20.69	1	1	0	0	0	0	0	0	0	0	0	0	0	0	0
isotig07873	cathepsin l	254	28.5173	5.021	1	1	1	3	0	0	0	0	0	0	0	0	0	0	0	0	0	0	0	0	0	0	0	0	0	0	0	0	2.87473	5.51	1	1	0	0	0	0	0	0	0	0	4.81781	5.51	1	2	0
isotig22451	simila to cg9796	217	23.7349	7.6792	1	3	3	10	0	0	0	0	0	0	0	0	0	0	0	0	0	0	0	0	0	0	0	0	0	0	0	0	0	0	0	0	0	0	0	0	0	0	0	0	9.30319	11.06	2	3	5.99878
isotig16585	mesencephalic astrocyte-derived neurotrophic factor homolog	179	20.2474	6.1001	5	2	2	7	0	0	0	0	0	0	0	0	0	0	0	0	0	0	0	0	0	0	0	0	0	0	0	0	0	0	0	0	0	0	0	0	0	0	0	0	3.60746	7.82	1	1	9.66238
A0A0K8R6Q5	Putative muscle lim protein isoform a isoform OS=Ixodes ricinus PE=2 SV=1 - [A0A0K8R6Q5_IXORI]	106	11.4153	8.23584	9	2	3	6	0	0	0	0	0	0	0	0	0	0	0	0	0	0	0	0	0	0	0	0	0	0	0	0	0	0	0	0	0	0	0	0	0	0	0	0	4.56691	28.3	2	2	3.03427
A0A0K8RRN0	Putative vesicle coat complex copii subunit sec23 (Fragment) OS=Ixodes ricinus PE=2 SV=1 - [A0A0K8RRN0_IXORI]	442	49.3163	6.91748	12	1	1	6	0	0	0	0	0	0	0	0	0	0	0	0	0	0	0	0	0	0	0	0	0	0	0	0	0	0	0	0	0	0	0	0	0	0	0	0	5.9584	2.71	1	2	8.94225
isotig18143	serine protease	447	48.926	5.96045	1	2	2	6	0	0	0	0	0	0	0	0	0	0	0	0	0	0	0	0	0	0	0	0	0	0	0	0	0	0	0	0	0	0	0	0	0	0	0	0	3.37996	2.68	1	1	7.75342
isotig22620	alkaline phosphatase 4-like	131	14.2086	6.55127	1	2	2	6	0	0	0	0	0	0	0	0	0	0	0	0	0	0	0	0	0	0	0	0	0	0	0	0	0	0	0	0	0	0	0	0	0	0	0	0	8.40567	18.32	2	3	2.48512
A0A023GKM4	Putative 17beta-hydroxysteroid dehydrogenase type 2 (Fragment) OS=Amblyomma triste PE=2 SV=1 - [A0A023GKM4_9ACAR]	275	30.3507	7.92822	1	1	1	5	0	0	0	0	0	0	0	0	0	0	0	0	0	0	0	0	0	0	0	0	0	0	0	0	0	0	0	0	0	0	0	0	0	0	0	0	0	0	0	0	8.66221
A0A0C9R4D6	Putative secreted protein OS=Amblyomma americanum PE=2 SV=1 - [A0A0C9R4D6_AMBAM]	113	12.2672	10.2427	1	2	2	5	0	0	0	0	0	0	0	0	0	0	0	0	0	0	0	0	0	0	0	0	0	0	0	0	0	0	0	0	0	0	0	0	0	0	0	0	2.01296	14.16	1	1	4.16263
A0A131XU85	Putative cytochrome OS=Ixodes ricinus PE=2 SV=1 - [A0A131XU85_IXORI]	518	59.2273	8.89502	1	1	1	5	0	0	0	0	0	0	0	0	0	0	0	0	0	0	0	0	0	0	0	0	0	0	0	0	0	0	0	0	0	0	0	0	0	0	0	0	4.66993	2.51	1	2	2.05199
B7QK67	Putative uncharacterized protein OS=Ixodes scapularis GN=IscW_ISCW014792 PE=4 SV=1 - [B7QK67_IXOSC]	96	10.4542	7.63525	1	1	1	5	0	0	0	0	0	0	0	0	0	0	0	0	0	0	0	0	0	0	0	0	0	0	0	0	0	0	0	0	0	0	0	0	0	0	0	0	2.22337	15.63	1	1	4.66712
F0J8V9	Proliferating cell nuclear antigen (Fragment) OS=Amblyomma variegatum PE=2 SV=1 - [F0J8V9_AMBVA]	230	25.1875	4.94482	7	1	1	5	0	0	0	0	0	0	0	0	0	0	0	0	0	0	0	0	0	0	0	0	0	0	0	0	0	0	0	0	0	0	0	0	0	0	0	0	7.64962	6.52	1	2	4.0729
isotig17183	epididymal secretory protein e1-like	156	16.7707	7.92822	1	2	2	5	0	0	0	0	0	0	0	0	0	0	0	0	0	0	0	0	0	0	0	0	0	0	0	0	0	0	0	0	0	0	0	0	0	0	0	0	2.7393	7.69	1	1	5.57994
A0A023FEN3	Putative low-density lipoprotein receptor (Fragment) OS=Amblyomma cajennense PE=2 SV=1 - [A0A023FEN3_9ACAR]	574	63.2247	5.14795	1	1	1	4	0	0	0	0	0	0	0	0	0	0	0	0	0	0	0	0	0	0	0	0	0	0	0	0	0	0	0	0	0	0	0	0	0	0	0	0	2.09589	1.92	1	1	4.92437
A0A023GI17	Putative dihydrolipoamide acetyltransferase (Fragment) OS=Amblyomma triste PE=2 SV=1 - [A0A023GI17_9ACAR]	306	31.7659	9.46631	11	1	3	4	0	0	0	0	0	0	0	0	0	0	0	0	0	0	0	0	0	0	0	0	0	0	0	0	0	0	0	0	0	0	0	0	0	0	0	0	6.32055	7.19	2	3	2.09475
A0A0N6VM48	Muscle LIM protein OS=Hyalomma rufipes GN=MLP PE=2 SV=1 - [A0A0N6VM48_9ACAR]	106	11.4393	8.23584	7	1	2	4	0	0	0	0	0	0	0	0	0	0	0	0	0	0	0	0	0	0	0	0	0	0	0	0	0	0	0	0	0	0	0	0	0	0	0	0	2.10979	13.21	1	1	3.03427
A0A131YY64	Cyclin dependent kinase 2 OS=Rhipicephalus appendiculatus PE=4 SV=1 - [A0A131YY64_RHIAP]	210	23.2658	5.021	2	1	1	4	0	0	0	0	0	0	0	0	0	0	0	0	0	0	0	0	0	0	0	0	0	0	0	0	0	0	0	0	0	0	0	0	0	0	0	0	2.25364	6.67	1	1	4.49567
A0A147BCZ7	Uncharacterized protein (Fragment) OS=Ixodes ricinus PE=4 SV=1 - [A0A147BCZ7_IXORI]	460	49.829	4.61475	1	1	1	4	0	0	0	0	0	0	0	0	0	0	0	0	0	0	0	0	0	0	0	0	0	0	0	0	0	0	0	0	0	0	0	0	0	0	0	0	2.02843	2.39	1	1	4.42282
A0A1E1XHP0	Putative aaa+-type atpase (Fragment) OS=Amblyomma aureolatum PE=2 SV=1 - [A0A1E1XHP0_9ACAR]	592	65.0998	5.56689	1	1	2	4	0	0	0	0	0	0	0	0	0	0	0	0	0	0	0	0	0	0	0	0	0	0	0	0	0	0	0	0	0	0	0	0	0	0	0	0	2.17952	2.03	1	1	2.85467
A0A1E1XLE7	Putative dna topoisomerase i-interacting protein (Fragment) OS=Amblyomma sculptum PE=2 SV=1 - [A0A1E1XLE7_9ACAR]	1465	164.88	5.69385	1	1	1	4	0	0	0	0	0	0	0	0	0	0	0	0	0	0	0	0	0	0	0	0	0	0	0	0	0	0	0	0	0	0	0	0	0	0	0	0	2.25539	0.82	1	1	2.04395
isotig05538	chitin deacetylase 1	539	61.0969	5.04639	5	3	3	4	0	0	0	0	0	0	0	0	0	0	0	0	0	0	0	0	0	0	0	0	0	0	0	0	0	0	0	0	0	0	0	0	0	0	0	0	7.44961	5.38	2	3	0
isotig11832	choline transporter-like protein 2	375	42.151	8.6167	2	1	1	4	0	0	0	0	0	0	0	0	0	0	0	0	0	0	0	0	0	0	0	0	0	0	0	0	0	0	0	0	0	0	0	0	0	0	0	0	5.66525	4.27	1	2	0
isotig12792|---NA---	isotig12792|---NA---	163	18.1962	5.22412	1	1	1	4	0	0	0	0	0	0	0	0	0	0	0	0	0	0	0	0	0	0	0	0	0	0	0	0	0	0	0	0	0	0	0	0	0	0	0	0	3.47132	7.36	1	1	2.35879
V5GPM2	Palmitoyltransferase (Fragment) OS=Ixodes ricinus PE=2 SV=1 - [V5GPM2_IXORI]	148	16.6513	7.35693	3	1	1	4	0	0	0	0	0	0	0	0	0	0	0	0	0	0	0	0	0	0	0	0	0	0	0	0	0	0	0	0	0	0	0	0	0	0	0	0	2.13243	6.08	1	1	4.16317
V5HC92	Putative vesicle coat complex copii subunit sec24/subunit sfb2 (Fragment) OS=Ixodes ricinus PE=2 SV=1 - [V5HC92_IXORI]	934	102.309	6.68311	1	1	1	4	0	0	0	0	0	0	0	0	0	0	0	0	0	0	0	0	0	0	0	0	0	0	0	0	0	0	0	0	0	0	0	0	0	0	0	0	4.90039	1.28	1	2	0
A0A0K8R501	Putative salivary lipocalin OS=Ixodes ricinus PE=2 SV=1 - [A0A0K8R501_IXORI]	163	18.7686	8.93896	11	1	1	3	0	0	0	0	0	0	0	0	0	0	0	0	0	0	0	0	0	0	0	0	0	0	0	0	0	0	0	0	0	0	0	0	0	0	0	0	2.41342	9.2	1	1	0
A0A131XK84	Uncharacterized protein (Fragment) OS=Hyalomma excavatum PE=2 SV=1 - [A0A131XK84_9ACAR]	1751	193.453	6.3667	1	1	2	3	0	0	0	0	0	0	0	0	0	0	0	0	0	0	0	0	0	0	0	0	0	0	0	0	0	0	0	0	0	0	0	0	0	0	0	0	4.7946	1.54	2	2	2.44107
A0A131XNZ8	Putative e3 ubiquitin-protein ligase mib1 (Fragment) OS=Ixodes ricinus PE=2 SV=1 - [A0A131XNZ8_IXORI]	281	30.7341	8.11865	5	2	2	3	0	0	0	0	0	0	0	0	0	0	0	0	0	0	0	0	0	0	0	0	0	0	0	0	0	0	0	0	0	0	0	0	0	0	0	0	0	0	0	0	2.16279
A0A131XR76	Putative dna-binding subunit of a dna-dependent protein kinase ku70 autoantigen OS=Hyalomma excavatum PE=2 SV=1 - [A0A131XR76_9ACAR]	599	67.3674	7.15186	1	1	2	3	0	0	0	0	0	0	0	0	0	0	0	0	0	0	0	0	0	0	0	0	0	0	0	0	0	0	0	0	0	0	0	0	0	0	0	0	4.1695	3.84	2	2	0
A0A131YUG7	Lipocalin OS=Rhipicephalus appendiculatus PE=4 SV=1 - [A0A131YUG7_RHIAP]	186	21.8085	9.78857	1	1	2	3	0	0	0	0	0	0	0	0	0	0	0	0	0	0	0	0	0	0	0	0	0	0	0	0	0	0	0	0	0	0	0	0	0	0	0	0	4.16254	12.9	2	2	2.07379
A0A131YYN0	DNA polymerase kappa OS=Rhipicephalus appendiculatus PE=3 SV=1 - [A0A131YYN0_RHIAP]	646	72.126	6.30322	1	1	1	3	0	0	0	0	0	0	0	0	0	0	0	0	0	0	0	0	0	0	0	0	0	0	0	0	0	0	0	0	0	0	0	0	0	0	0	0	0	0	0	0	4.39027
A0A147B7S9	Cytidylate kinase (Fragment) OS=Carios mimon PE=3 SV=1 - [A0A147B7S9_9ACAR]	225	25.1489	8.77783	10	2	2	3	0	0	0	0	0	0	0	0	0	0	0	0	0	0	0	0	0	0	0	0	0	0	0	0	0	0	0	0	0	0	0	0	0	0	0	0	4.90393	7.11	1	2	0
A0A147BIQ0	Putative non-ltr rnase hi domain of reverse transcriptase (Fragment) OS=Ixodes ricinus PE=4 SV=1 - [A0A147BIQ0_IXORI]	305	34.6713	9.5249	1	1	1	3	0	0	0	0	0	0	0	0	0	0	0	0	0	0	0	0	0	0	0	0	0	0	0	0	0	0	0	0	0	0	0	0	0	0	0	0	0	0	0	0	4.14197
B7Q057	HEAT repeat-containing protein OS=Ixodes scapularis GN=IscW_ISCW008558 PE=4 SV=1 - [B7Q057_IXOSC]	2866	319.549	6.20166	1	1	1	3	0	0	0	0	0	0	0	0	0	0	0	0	0	0	0	0	0	0	0	0	0	0	0	0	0	0	0	0	0	0	0	0	0	0	0	0	0	0	0	0	2.43456
B7Q2R6	Putative uncharacterized protein OS=Ixodes scapularis GN=IscW_ISCW010020 PE=4 SV=1 - [B7Q2R6_IXOSC]	365	41.4112	8.47021	1	1	1	3	0	0	0	0	0	0	0	0	0	0	0	0	0	0	0	0	0	0	0	0	0	0	0	0	0	0	0	0	0	0	0	0	0	0	0	0	2.53892	3.29	1	1	4.05262
G9NSEKQ02GKAU8|---NA---	G9NSEKQ02GKAU8|---NA---	92	9.87188	5.14795	1	1	1	3	0	0	0	0	0	0	0	0	0	0	0	0	0	0	0	0	0	0	0	0	0	0	0	0	0	0	0	0	0	0	0	0	0	0	0	0	3.05517	10.87	1	1	0
L7LX10	Putative vesicle coat complex copi beta' subunit OS=Rhipicephalus pulchellus PE=2 SV=1 - [L7LX10_9ACAR]	804	85.8671	5.73193	3	1	1	3	0	0	0	0	0	0	0	0	0	0	0	0	0	0	0	0	0	0	0	0	0	0	0	0	0	0	0	0	0	0	0	0	0	0	0	0	2.32751	1.62	1	1	4.52984
L7M7M0	Putative phosducin-like protein OS=Rhipicephalus pulchellus PE=2 SV=1 - [L7M7M0_9ACAR]	282	32.0524	4.76709	1	1	2	3	0	0	0	0	0	0	0	0	0	0	0	0	0	0	0	0	0	0	0	0	0	0	0	0	0	0	0	0	0	0	0	0	0	0	0	0	0	0	0	0	2.04482
L7MLI8	Putative tick transposon (Fragment) OS=Rhipicephalus pulchellus PE=2 SV=1 - [L7MLI8_9ACAR]	913	102.307	8.57275	1	1	2	3	0	0	0	0	0	0	0	0	0	0	0	0	0	0	0	0	0	0	0	0	0	0	0	0	0	0	0	0	0	0	0	0	0	0	0	0	0	0	0	0	2.34299
V5HUN8	Uncharacterized protein (Fragment) OS=Ixodes ricinus PE=2 SV=1 - [V5HUN8_IXORI]	174	20.5661	10.0815	2	1	1	3	0	0	0	0	0	0	0	0	0	0	0	0	0	0	0	0	0	0	0	0	0	0	0	0	0	0	0	0	0	0	0	0	0	0	0	0	2.44225	8.62	1	1	0
A0A023FIK2	Putative cuticle protein (Fragment) OS=Amblyomma cajennense PE=2 SV=1 - [A0A023FIK2_9ACAR]	309	29.6472	9.48096	1	1	1	2	0	0	0	0	0	0	0	0	0	0	0	0	0	0	0	0	0	0	0	0	0	0	0	0	0	0	0	0	0	0	0	0	0	0	0	0	4.10521	4.53	1	2	0
A0A023FL16	Putative translation initiation factor 3 subunit a eif-3a (Fragment) OS=Amblyomma cajennense PE=2 SV=1 - [A0A023FL16_9ACAR]	673	82.0779	8.83643	9	2	2	2	0	0	0	0	0	0	0	0	0	0	0	0	0	0	0	0	0	0	0	0	0	0	0	0	0	0	0	0	0	0	0	0	0	0	0	0	4.14852	3.86	2	2	0
A0A023FNR5	Uncharacterized protein OS=Amblyomma cajennense PE=2 SV=1 - [A0A023FNR5_9ACAR]	231	26.2492	9.92041	3	2	2	2	0	0	0	0	0	0	0	0	0	0	0	0	0	0	0	0	0	0	0	0	0	0	0	0	0	0	0	0	0	0	0	0	0	0	0	0	0	0	0	0	0
A0A023G132	Uncharacterized protein (Fragment) OS=Amblyomma parvum PE=2 SV=1 - [A0A023G132_9ACAR]	150	17.8107	7.06396	3	2	2	2	0	0	0	0	0	0	0	0	0	0	0	0	0	0	0	0	0	0	0	0	0	0	0	0	0	0	0	0	0	0	0	0	0	0	0	0	4.56728	16.67	2	2	0
A0A090XCY0	Putative secreted protein OS=Ixodes ricinus PE=2 SV=1 - [A0A090XCY0_IXORI]	80	8.3852	5.40186	1	1	1	2	0	0	0	0	0	0	0	0	0	0	0	0	0	0	0	0	0	0	0	0	0	0	0	0	0	0	0	0	0	0	0	0	0	0	0	0	0	0	0	0	0
A0A0K8RHF7	Putative dna-directed rna polymerase i subunit rpa49 OS=Ixodes ricinus PE=2 SV=1 - [A0A0K8RHF7_IXORI]	158	17.9135	10.7114	3	1	1	2	0	0	0	0	0	0	0	0	0	0	0	0	0	0	0	0	0	0	0	0	0	0	0	0	0	0	0	0	0	0	0	0	0	0	0	0	4.78205	8.86	1	2	0
A0A0N9G2P5	Cytochrome c oxidase subunit 1 (Fragment) OS=Phytoseiidae sp. BOLD:ACF8412 GN=COI PE=3 SV=1 - [A0A0N9G2P5_9ACAR]	192	21.2531	6.78564	6	1	1	2	0	0	0	0	0	0	0	0	0	0	0	0	0	0	0	0	0	0	0	0	0	0	0	0	0	0	0	0	0	0	0	0	0	0	0	0	4.31893	5.73	1	2	0
A0A131XDT0	Putative alpha-tubulin suppressor (Fragment) OS=Hyalomma excavatum PE=2 SV=1 - [A0A131XDT0_9ACAR]	554	60.0953	6.15088	1	1	1	2	0	0	0	0	0	0	0	0	0	0	0	0	0	0	0	0	0	0	0	0	0	0	0	0	0	0	0	0	0	0	0	0	0	0	0	0	4.11223	2.35	1	2	0
A0A131XF53	Putative cop9 signalosome complex subunit 5 isoform 2 OS=Hyalomma excavatum PE=2 SV=1 - [A0A131XF53_9ACAR]	336	38.0048	5.87158	1	1	1	2	0	0	0	0	0	0	0	0	0	0	0	0	0	0	0	0	0	0	0	0	0	0	0	0	0	0	0	0	0	0	0	0	0	0	0	0	0	0	0	0	0
A0A131XLZ2	Putative phosphoglucomutase (Fragment) OS=Hyalomma excavatum PE=2 SV=1 - [A0A131XLZ2_9ACAR]	556	61.0072	6.26514	1	1	1	2	0	0	0	0	0	0	0	0	0	0	0	0	0	0	0	0	0	0	0	0	0	0	0	0	0	0	0	0	0	0	0	0	0	0	0	0	0	0	0	0	4.20169
A0A131Y258	Putative gdp-mannose pyrophosphorylase OS=Ixodes ricinus PE=2 SV=1 - [A0A131Y258_IXORI]	360	39.6968	6.25244	11	1	2	2	0	0	0	0	0	0	0	0	0	0	0	0	0	0	0	0	0	0	0	0	0	0	0	0	0	0	0	0	0	0	0	0	0	0	0	0	4.88128	6.94	2	2	0
A0A131Y295	Uncharacterized protein (Fragment) OS=Ixodes ricinus PE=2 SV=1 - [A0A131Y295_IXORI]	205	22.5129	8.1333	2	2	2	2	0	0	0	0	0	0	0	0	0	0	0	0	0	0	0	0	0	0	0	0	0	0	0	0	0	0	0	0	0	0	0	0	0	0	0	0	0	0	0	0	4.1299
A0A131Y5X1	Putative tick transposon (Fragment) OS=Ixodes ricinus PE=2 SV=1 - [A0A131Y5X1_IXORI]	703	80.4944	9.67139	1	1	1	2	0	0	0	0	0	0	0	0	0	0	0	0	0	0	0	0	0	0	0	0	0	0	0	0	0	0	0	0	0	0	0	0	0	0	0	0	0	0	0	0	4.51492
A0A131YD14	Spermine oxidase OS=Rhipicephalus appendiculatus PE=4 SV=1 - [A0A131YD14_RHIAP]	1089	122.054	5.43994	3	1	1	2	0	0	0	0	0	0	0	0	0	0	0	0	0	0	0	0	0	0	0	0	0	0	0	0	0	0	0	0	0	0	0	0	0	0	0	0	4.12943	1.47	1	2	0
A0A131YEV4	Ribosome-binding factor A OS=Rhipicephalus appendiculatus PE=4 SV=1 - [A0A131YEV4_RHIAP]	342	38.7196	6.69775	1	1	1	2	0	0	0	0	0	0	0	0	0	0	0	0	0	0	0	0	0	0	0	0	0	0	0	0	0	0	0	0	0	0	0	0	0	0	0	0	2.4045	3.8	1	2	0
A0A131Z1M0	RNA-binding protein 4 OS=Rhipicephalus appendiculatus PE=4 SV=1 - [A0A131Z1M0_RHIAP]	194	21.345	8.06006	9	1	1	2	0	0	0	0	0	0	0	0	0	0	0	0	0	0	0	0	0	0	0	0	0	0	0	0	0	0	0	0	0	0	0	0	0	0	0	0	4.92097	6.19	1	2	0
A0A131Z6A3	80 kD MCM3 associated protein (Fragment) OS=Rhipicephalus appendiculatus PE=4 SV=1 - [A0A131Z6A3_RHIAP]	1464	163.711	6.07471	2	1	1	2	0	0	0	0	0	0	0	0	0	0	0	0	0	0	0	0	0	0	0	0	0	0	0	0	0	0	0	0	0	0	0	0	0	0	0	0	4.1937	1.09	1	2	0
A0A131ZAK1	Tick serine protease (Fragment) OS=Rhipicephalus appendiculatus PE=3 SV=1 - [A0A131ZAK1_RHIAP]	203	22.9729	9.1001	1	1	1	2	0	0	0	0	0	0	0	0	0	0	0	0	0	0	0	0	0	0	0	0	0	0	0	0	0	0	0	0	0	0	0	0	0	0	0	0	0	0	0	0	2.22842
A0A131ZCD0	Lipoprotein amino terminal region (Fragment) OS=Rhipicephalus appendiculatus PE=4 SV=1 - [A0A131ZCD0_RHIAP]	998	115.156	7.35693	1	1	1	2	0	0	0	0	0	0	0	0	0	0	0	0	0	0	0	0	0	0	0	0	0	0	0	0	0	0	0	0	0	0	0	0	0	0	0	0	4.40605	1.3	1	2	0
A0A147B861	Zinc finger protein 713 (Fragment) OS=Carios mimon PE=4 SV=1 - [A0A147B861_9ACAR]	146	15.7161	8.51416	1	1	1	2	0	0	0	0	0	0	0	0	0	0	0	0	0	0	0	0	0	0	0	0	0	0	0	0	0	0	0	0	0	0	0	0	0	0	0	0	4.05646	6.16	1	2	0
A0A147BQK9	Putative chromatin remodeling complex wstf-iswi small subunit (Fragment) OS=Ixodes ricinus PE=4 SV=1 - [A0A147BQK9_IXORI]	1498	167.331	9.70068	1	1	2	2	0	0	0	0	0	0	0	0	0	0	0	0	0	0	0	0	0	0	0	0	0	0	0	0	0	0	0	0	0	0	0	0	0	0	0	0	4.16226	1.2	2	2	0
A0A1E1X3L7	Putative e3 ubiquitin-protein ligase rnf31 (Fragment) OS=Amblyomma aureolatum PE=2 SV=1 - [A0A1E1X3L7_9ACAR]	419	48.04	5.07178	1	1	1	2	0	0	0	0	0	0	0	0	0	0	0	0	0	0	0	0	0	0	0	0	0	0	0	0	0	0	0	0	0	0	0	0	0	0	0	0	0	0	0	0	4.13636
A0A1E1X638	Uncharacterized protein (Fragment) OS=Amblyomma aureolatum PE=2 SV=1 - [A0A1E1X638_9ACAR]	345	39.1679	9.48096	1	1	1	2	0	0	0	0	0	0	0	0	0	0	0	0	0	0	0	0	0	0	0	0	0	0	0	0	0	0	0	0	0	0	0	0	0	0	0	0	0	0	0	0	2.15563
A0A1E1XDW0	Putative rho-associated coiled-coil OS=Amblyomma aureolatum PE=2 SV=1 - [A0A1E1XDW0_9ACAR]	403	43.3035	5.97314	3	2	2	2	0	0	0	0	0	0	0	0	0	0	0	0	0	0	0	0	0	0	0	0	0	0	0	0	0	0	0	0	0	0	0	0	0	0	0	0	0	0	0	0	4.16055
A0A1E1XGG0	Putative structural maintenance of chromosome protein 2 chromosome condensation complex condensin (Fragment) OS=Amblyomma aureolatum PE=2 SV=1 - [A0A1E1XGG0_9ACAR]	2047	230.214	8.19189	1	1	2	2	0	0	0	0	0	0	0	0	0	0	0	0	0	0	0	0	0	0	0	0	0	0	0	0	0	0	0	0	0	0	0	0	0	0	0	0	4.12724	1.37	2	2	0
A0A1E1XW82	Putative ca2+ release channel ryanodine receptor (Fragment) OS=Amblyomma sculptum PE=2 SV=1 - [A0A1E1XW82_9ACAR]	861	97.0518	5.89697	1	2	2	2	0	0	0	0	0	0	0	0	0	0	0	0	0	0	0	0	0	0	0	0	0	0	0	0	0	0	0	0	0	0	0	0	0	0	0	0	0	0	0	0	4.27543
B7P703	Putative uncharacterized protein OS=Ixodes scapularis GN=IscW_ISCW000491 PE=4 SV=1 - [B7P703_IXOSC]	220	24.9834	11.5317	1	1	1	2	0	0	0	0	0	0	0	0	0	0	0	0	0	0	0	0	0	0	0	0	0	0	0	0	0	0	0	0	0	0	0	0	0	0	0	0	0	0	0	0	0
B7PCQ0	Putative uncharacterized protein OS=Ixodes scapularis GN=IscW_ISCW017224 PE=4 SV=1 - [B7PCQ0_IXOSC]	114	13.3961	9.75928	1	2	2	2	0	0	0	0	0	0	0	0	0	0	0	0	0	0	0	0	0	0	0	0	0	0	0	0	0	0	0	0	0	0	0	0	0	0	0	0	4.15166	23.68	2	2	0
B7PY86	Single-stranded DNA-binding protein, putative (Fragment) OS=Ixodes scapularis GN=IscW_ISCW024613 PE=4 SV=1 - [B7PY86_IXOSC]	147	13.995	10.0815	1	1	1	2	0	0	0	0	0	0	0	0	0	0	0	0	0	0	0	0	0	0	0	0	0	0	0	0	0	0	0	0	0	0	0	0	0	0	0	0	0	0	0	0	0
B7QGW6	Ikappab kinase complex-associated protein, putative (Fragment) OS=Ixodes scapularis GN=IscW_ISCW013788 PE=4 SV=1 - [B7QGW6_IXOSC]	838	94.5806	6.82959	1	2	2	2	0	0	0	0	0	0	0	0	0	0	0	0	0	0	0	0	0	0	0	0	0	0	0	0	0	0	0	0	0	0	0	0	0	0	0	0	0	0	0	0	0
B7QLA5	Phosphoenolpyruvate carboxylase kinase, putative OS=Ixodes scapularis GN=IscW_ISCW014712 PE=4 SV=1 - [B7QLA5_IXOSC]	225	25.6639	6.53662	1	1	1	2	0	0	0	0	0	0	0	0	0	0	0	0	0	0	0	0	0	0	0	0	0	0	0	0	0	0	0	0	0	0	0	0	0	0	0	0	2.29064	5.33	1	2	0
G9NSEKQ01BGF98|---NA---	G9NSEKQ01BGF98|---NA---	86	9.2387	6.44287	1	1	1	2	0	0	0	0	0	0	0	0	0	0	0	0	0	0	0	0	0	0	0	0	0	0	0	0	0	0	0	0	0	0	0	0	0	0	0	0	0	0	0	0	7.5348
G9NSEKQ01DN5IK|---NA---	G9NSEKQ01DN5IK|---NA---	65	6.95131	9.99365	1	1	1	2	0	0	0	0	0	0	0	0	0	0	0	0	0	0	0	0	0	0	0	0	0	0	0	0	0	0	0	0	0	0	0	0	0	0	0	0	5.04708	20	1	2	0
G9NSEKQ01EVFPF	lim domain-containing protein 2	126	13.9166	7.7085	1	1	1	2	0	0	0	0	0	0	0	0	0	0	0	0	0	0	0	0	0	0	0	0	0	0	0	0	0	0	0	0	0	0	0	0	0	0	0	0	0	0	0	0	0
isotig04262	betaine aldehyde dehydrogenase	519	57.5088	8.25049	1	2	2	2	0	0	0	0	0	0	0	0	0	0	0	0	0	0	0	0	0	0	0	0	0	0	0	0	0	0	0	0	0	0	0	0	0	0	0	0	0	0	0	0	0
isotig08119|---NA---	isotig08119|---NA---	355	39.7044	7.88428	2	2	2	2	0	0	0	0	0	0	0	0	0	0	0	0	0	0	0	0	0	0	0	0	0	0	0	0	0	0	0	0	0	0	0	0	0	0	0	0	4.9016	6.48	2	2	0
isotig12737	PREDICTED: uncharacterized protein LOC100897310	195	21.7648	5.30029	1	1	1	2	0	0	0	0	0	0	0	0	0	0	0	0	0	0	0	0	0	0	0	0	0	0	0	0	0	0	0	0	0	0	0	0	0	0	0	0	0	0	0	0	0
isotig14303|---NA---	isotig14303|---NA---	193	22.1115	7.1665	1	1	2	2	0	0	0	0	0	0	0	0	0	0	0	0	0	0	0	0	0	0	0	0	0	0	0	0	0	0	0	0	0	0	0	0	0	0	0	0	0	0	0	0	0
isotig23499	lysosomal alpha-mannosidase-like	233	26.547	6.39209	1	1	1	2	0	0	0	0	0	0	0	0	0	0	0	0	0	0	0	0	0	0	0	0	0	0	0	0	0	0	0	0	0	0	0	0	0	0	0	0	0	0	0	0	5.68214
L7LSQ6	Putative sulfotransferase OS=Rhipicephalus pulchellus PE=2 SV=1 - [L7LSQ6_9ACAR]	392	45.2952	7.85498	2	1	1	2	0	0	0	0	0	0	0	0	0	0	0	0	0	0	0	0	0	0	0	0	0	0	0	0	0	0	0	0	0	0	0	0	0	0	0	0	0	0	0	0	0
L7M0Y7	Uncharacterized protein OS=Rhipicephalus pulchellus PE=2 SV=1 - [L7M0Y7_9ACAR]	358	39.3553	8.98291	1	1	1	2	0	0	0	0	0	0	0	0	0	0	0	0	0	0	0	0	0	0	0	0	0	0	0	0	0	0	0	0	0	0	0	0	0	0	0	0	4.07586	4.47	1	2	0
L7MJV8	Putative caspase apoptotic cysteine protease (Fragment) OS=Rhipicephalus pulchellus PE=2 SV=1 - [L7MJV8_9ACAR]	283	31.735	8.42627	25	1	2	2	0	0	0	0	0	0	0	0	0	0	0	0	0	0	0	0	0	0	0	0	0	0	0	0	0	0	0	0	0	0	0	0	0	0	0	0	4.15858	6.71	2	2	0
V5HUG4	Uncharacterized protein (Fragment) OS=Ixodes ricinus PE=2 SV=1 - [V5HUG4_IXORI]	135	15.6055	6.37939	1	1	1	2	0	0	0	0	0	0	0	0	0	0	0	0	0	0	0	0	0	0	0	0	0	0	0	0	0	0	0	0	0	0	0	0	0	0	0	0	0	0	0	0	4.04375
V5IF16	Putative zinc ion binding protein (Fragment) OS=Ixodes ricinus PE=2 SV=1 - [V5IF16_IXORI]	229	26.4648	9.77393	1	1	1	2	0	0	0	0	0	0	0	0	0	0	0	0	0	0	0	0	0	0	0	0	0	0	0	0	0	0	0	0	0	0	0	0	0	0	0	0	0	0	0	0	2.40975
V5II63	Uncharacterized protein (Fragment) OS=Ixodes ricinus PE=2 SV=1 - [V5II63_IXORI]	250	27.5861	8.57275	1	2	2	2	0	0	0	0	0	0	0	0	0	0	0	0	0	0	0	0	0	0	0	0	0	0	0	0	0	0	0	0	0	0	0	0	0	0	0	0	0	0	0	0	0
[truncated: 12 more columns]

## Sheet: Host proteins
Supplementary table 1: Proteomic results. Host proteins.
Accession	Description	AAs	MW [kDa]	calc. pI	Σ Proteins	Σ Unique Peptides	Σ Peptides	Σ PSMs	Score FA1	Coverage FA1	Peptides FA1	PSM FA1	Score FA2	Coverage FA2	Peptides FA2	PSM FA2	Score FA3	Coverage FA3	Peptides FA3	PSM FA3	Score UA1	Coverage UA1	Peptides UA1	PSM UA1	Score UA2	Coverage UA2	Peptides UA2	PSM UA2	Score UA3	Coverage UA3	Peptides UA3	PSM UA3	Score FN1	Coverage FN1	Peptides FN1	PSM FN1	Score FN2	Coverage FN2	Peptides FN2	PSM FN2	Score FN3	Coverage FN3	Peptides FN3	PSM FN3	Score UN1	Coverage UN1	Peptides UN1	PSM UN1	Score UN2
P01994	Hemoglobin subunit alpha-A OS=Gallus gallus GN=HBAA PE=1 SV=2 - [HBA_CHICK]	142	15.4191	8.44092	1	4	8	1633	803.887	50	7	211	811.549	50	7	205	901.703	48.59	6	226	523.114	34.51	4	142	901.912	42.96	5	224	736.407	50	7	193	480.691	49.3	6	128	167.339	42.96	5	57	155.974	42.96	5	52	135.303	49.3	6	46	260.438
P19121	Serum albumin OS=Gallus gallus GN=ALB PE=1 SV=2 - [ALBU_CHICK]	615	69.8719	5.74463	1	1	34	802	267.796	25.85	20	92	309.323	30.57	25	103	283.15	28.29	24	96	226.018	22.6	16	75	240.727	24.39	18	81	249.056	25.37	20	83	106.341	31.54	20	32	102.261	27.48	16	38	125.654	35.12	22	44	115.259	35.77	25	42	187.248
A0A1D5NW68	Serum albumin OS=Gallus gallus GN=ALB PE=3 SV=1 - [A0A1D5NW68_CHICK]	615	69.8449	5.74463	1	2	35	766	263.613	25.85	19	86	299.995	30.57	24	97	278.791	28.29	23	90	219.163	22.6	15	71	233.073	24.39	17	74	244.889	25.37	19	79	103.737	31.38	19	31	102.261	27.48	16	38	124.991	36.26	22	43	123.217	37.24	26	44	183.93
F1NV02	Apolipoprotein B OS=Gallus gallus GN=APOB PE=4 SV=2 - [F1NV02_CHICK]	4631	523.029	8.32373	2	91	96	494	250.86	16.71	67	88	266.579	17.49	69	92	242.93	16.58	68	84	127.172	8.66	37	49	170.905	12.42	49	61	183.52	12.59	50	66	0	0	0	0	4.54634	0.41	2	2	8.83933	0.82	3	4	12.0771	1.23	5	5	85.2763
P02112	Hemoglobin subunit beta OS=Gallus gallus GN=HBB PE=1 SV=2 - [HBB_CHICK]	147	16.4556	8.63135	2	11	13	1099	217.641	70.75	11	82	207.543	65.31	10	79	229.691	70.75	12	87	176.936	59.18	9	65	182.65	59.18	10	64	200.402	59.18	10	74	134.882	68.71	10	49	410.195	52.38	8	161	253.976	72.79	11	99	259.27	61.9	10	102	458.949
F1NFL6	Vitellogenin-2 OS=Gallus gallus GN=VTG2 PE=4 SV=1 - [F1NFL6_CHICK]	1854	205.019	9.1001	6	50	50	560	198.707	21.36	33	61	225.573	20.66	32	70	243.372	24.27	38	80	159.789	18.99	29	49	183.008	21.04	32	57	180.133	19.31	30	57	52.8581	8.9	13	18	70.7946	7.93	13	25	82.3766	13.05	20	28	92.2286	15.1	23	31	147.49
A0A1D5PQC3	Spectrin alpha chain, non-erythrocytic 1 OS=Gallus gallus GN=SPTAN1 PE=4 SV=1 - [A0A1D5PQC3_CHICK]	2449	281.988	5.33838	8	57	64	357	178.217	20.74	43	57	195.601	20.87	43	62	197.282	19.93	40	62	93.6345	12.66	26	29	133.233	13.35	28	41	176.016	17.19	34	53	12.6844	2.2	5	5	10.987	1.27	3	4	35.2907	3.51	7	11	6.36446	0.86	2	2	43.2683
P02001	Hemoglobin subunit alpha-D OS=Gallus gallus GN=HBAD PE=1 SV=1 - [HBAD_CHICK]	141	15.685	7.59131	2	9	9	467	158.173	59.57	9	52	157.725	59.57	9	53	171.046	59.57	9	58	58.5388	59.57	9	18	100.511	59.57	9	32	100.802	58.87	8	35	115.382	59.57	9	41	180.866	59.57	9	62	79.4632	59.57	9	26	63.2564	53.19	8	20	123.057
A0A1D5PPV0	Uncharacterized protein OS=Gallus gallus PE=3 SV=1 - [A0A1D5PPV0_CHICK]	147	16.6177	8.29443	9	1	7	730	135.372	24.49	4	53	118.222	33.33	5	47	124.318	33.33	6	49	100.144	23.81	3	39	113.228	42.18	7	43	122.263	24.49	5	48	87.0043	29.25	4	34	312.95	29.25	4	130	176.397	33.33	5	74	203.609	32.65	4	83	257.692
F1NMZ3	Uncharacterized protein OS=Gallus gallus GN=HBBR PE=3 SV=1 - [F1NMZ3_CHICK]	147	16.6067	8.90967	7	1	7	730	135.372	24.49	4	53	118.222	33.33	5	47	124.318	33.33	6	49	100.144	23.81	3	39	111.108	33.33	6	42	122.263	24.49	5	48	87.0043	29.25	4	34	312.95	29.25	4	130	176.397	33.33	5	74	203.609	32.65	4	83	259.949
P02789	Ovotransferrin OS=Gallus gallus PE=1 SV=2 - [TRFE_CHICK]	705	77.7264	7.12256	1	1	30	315	122.572	28.09	20	38	117.892	26.38	19	39	115.856	25.11	16	35	97.1733	23.26	16	32	148.907	24.54	18	47	142.206	25.53	18	46	22.8774	8.65	6	8	32.3496	10.78	7	12	20.0564	10.07	8	8	34.1219	20.57	12	12	70.041
P87498	Vitellogenin-1 OS=Gallus gallus GN=VTG1 PE=1 SV=1 - [VIT1_CHICK]	1912	210.498	8.99756	1	1	40	288	113.839	16.58	28	38	113.527	17.15	28	38	101.328	16.32	27	35	88.8609	13.65	24	32	97.119	15.27	26	33	99.8321	16.11	26	34	12.5165	2.82	5	5	26.8121	4.6	8	10	32.0831	5.18	9	11	33.1338	6.01	10	12	69.5608
Q7SX63	Heat shock protein 70 OS=Gallus gallus GN=HSP70 PE=3 SV=1 - [Q7SX63_CHICK]	634	69.8698	5.85889	22	13	23	356	121.644	32.97	20	40	113.982	31.55	18	37	109.895	30.44	17	33	109.884	33.6	19	36	126.525	35.65	21	41	129.072	31.23	19	42	63.5938	15.93	8	19	78.0484	15.77	8	24	62.223	19.87	10	19	59.754	15.77	8	19	51.1295
A0A1D5P9N5	Vitellogenin-1 OS=Gallus gallus GN=VTG1 PE=4 SV=1 - [A0A1D5P9N5_CHICK]	1905	209.756	8.98291	2	2	41	290	116.651	17.27	29	39	111.479	17.48	28	37	98.3235	16.64	27	34	91.8349	14.33	25	33	100.537	15.96	27	34	103.102	16.8	27	35	12.5165	2.83	5	5	26.8121	4.62	8	10	32.0831	5.2	9	11	33.1338	6.04	10	12	69.5608
A0A1D5P4L7	Ovotransferrin OS=Gallus gallus GN=TF PE=3 SV=1 - [A0A1D5P4L7_CHICK]	705	77.7684	7.12256	4	1	30	306	109.066	28.09	20	35	113.047	26.38	19	38	105.193	25.11	16	32	89.1024	23.26	16	30	141.33	24.54	18	45	131.246	25.53	18	43	22.8774	8.65	6	8	38.0392	13.33	8	14	26.143	12.62	9	10	36.5333	20.57	12	13	69.5746
F1NWP3	Heat shock cognate 71 kDa protein OS=Gallus gallus GN=HSPA8 PE=3 SV=1 - [F1NWP3_CHICK]	646	70.8272	5.51611	26	7	19	274	93.276	29.1	17	29	109.598	30.8	18	34	93.1939	30.5	17	27	59.544	24.77	13	19	94.1454	28.95	16	28	104.439	30.65	18	33	63.0219	20.43	10	19	76.1894	13.93	7	23	48.8337	15.63	8	14	52.18	15.79	8	15	43.8727
F1NK40	Uncharacterized protein OS=Gallus gallus GN=A2ML4 PE=4 SV=4 - [F1NK40_CHICK]	1474	163.236	6.3667	1	28	29	201	85.137	16.28	22	30	81.8294	17.1	22	29	87.6082	15.13	19	30	59.9794	13.03	17	22	72.6814	13.7	18	25	78.4162	16.69	22	28	5.0223	1.83	2	2	5.51075	1.7	2	2	29.136	5.9	7	10	27.5408	5.97	7	9	26.1065
A0A1D5PYZ8	Spectrin beta chain OS=Gallus gallus GN=SPTB PE=3 SV=1 - [A0A1D5PYZ8_CHICK]	2295	262.258	5.92236	4	36	37	154	110.567	12.77	23	35	71.0048	9.37	16	21	74.6549	10.07	19	25	36.5615	5.66	11	13	52.2359	7.93	15	18	56.0221	8.63	15	18	7.57183	1.57	3	3	2.08877	0.39	1	1	5.86941	0.87	2	2	2.95051	0.39	1	1	27.3923
P09206	Tubulin beta-3 chain OS=Gallus gallus PE=2 SV=1 - [TBB3_CHICK]	445	49.829	4.85596	6	1	16	317	71.446	32.58	12	23	81.0007	34.16	12	26	80.3462	31.46	11	26	78.7376	34.38	13	25	64.2057	31.91	11	21	83.9175	34.38	13	26	87.4879	35.73	12	27	79.6809	17.75	7	28	83.7744	31.01	11	26	108.927	40	14	36	77.4254
F1NYB1	Tubulin beta chain OS=Gallus gallus GN=TUBB PE=3 SV=3 - [F1NYB1_CHICK]	445	49.843	4.85596	15	0	16	321	71.2183	32.58	12	23	81.2788	34.16	12	26	79.6638	31.46	11	26	73.1499	34.38	13	23	62.6432	31.91	11	21	82.9548	34.38	13	26	91.6675	39.1	13	29	65.7888	14.38	6	23	84.6641	34.38	12	27	115.373	43.37	15	38	77.9513
A0A1D5PCD2	Uncharacterized protein OS=Gallus gallus PE=4 SV=2 - [A0A1D5PCD2_CHICK]	1419	158.012	6.62451	1	22	26	174	63.8586	11.28	14	22	76.832	14.87	18	25	62.2215	11.06	13	21	46.7917	8.53	10	16	47.892	10.36	12	16	45.5008	10.71	13	16	14.4527	4.86	6	6	9.38818	2.82	4	4	22.3805	5.71	7	8	39.1626	7.82	9	14	44.1962
A0A1D5PDK4	Adenosine deaminase OS=Gallus gallus GN=ADA PE=4 SV=1 - [A0A1D5PDK4_CHICK]	325	37.0195	5.80811	3	12	12	145	60.5854	36.31	10	21	58.9847	36.62	11	21	70.0345	33.85	9	23	24.9088	25.54	7	10	82.54	36.92	11	28	50.7099	36.31	10	18	9.94952	8.92	2	3	8.25834	7.69	2	3	11.7763	12	3	5	2.63191	4.31	1	1	14.6125
A0A1D5P9F9	Uncharacterized protein OS=Gallus gallus PE=4 SV=1 - [A0A1D5P9F9_CHICK]	1496	166.516	7.92822	4	30	30	155	53.6855	12.37	16	19	56.5374	13.03	16	21	67.2417	12.23	16	24	50.3808	10.7	13	17	48.1146	10.83	14	17	52.8917	12.43	16	18	7.31985	1.67	2	3	9.54486	2.21	3	4	12.7307	2.61	3	4	16.2044	3.61	5	6	36.8018
A0A1D5P5R0	Heat shock protein HSP 90-alpha OS=Gallus gallus GN=HSP90AA1 PE=3 SV=1 - [A0A1D5P5R0_CHICK]	719	83.0101	5.12256	6	7	21	177	55.7722	20.17	13	19	66.1538	22.11	14	21	53.019	21.97	14	18	43.7686	15.99	11	15	75.7151	24.48	17	26	40.8512	14.33	9	14	26.0536	12.8	8	9	27.4775	12.8	8	10	27.2118	11.27	7	9	22.3223	9.6	6	7	47.8014
P07630	Carbonic anhydrase 2 OS=Gallus gallus GN=CA2 PE=2 SV=3 - [CAH2_CHICK]	260	28.9893	7.04932	3	10	10	157	69.2904	33.46	7	24	51.6718	30	6	17	49.7601	29.62	6	16	54.1198	30	6	17	47.4588	33.46	7	16	43.3276	33.46	7	14	25.9842	36.54	7	8	8.36417	13.08	3	3	17.5973	23.46	5	6	29.6411	34.23	7	11	34.3386
A0A1D5P2V1	Uncharacterized protein OS=Gallus gallus GN=TTC38 PE=4 SV=1 - [A0A1D5P2V1_CHICK]	436	48.9537	6.04932	2	4	10	107	40.9261	28.44	9	13	54.8459	27.98	9	18	53.354	24.54	8	16	48.7934	21.56	7	16	46.4633	24.54	8	15	41.3348	24.54	8	13	12.2235	13.76	4	4	0	0	0	0	2.54426	3.9	1	1	7.26103	3.21	1	2	7.94705
Q90593	78 kDa glucose-regulated protein OS=Gallus gallus GN=HSPA5 PE=1 SV=1 - [GRP78_CHICK]	652	71.9743	5.22412	5	6	12	152	54.9691	18.25	9	16	54.1702	16.26	9	16	49.5598	13.96	8	14	32.3313	12.12	6	10	53.7335	15.03	7	16	55.0477	14.42	8	17	36.0124	9.97	5	11	50.0292	5.83	3	14	30.7685	8.44	4	9	35.3573	9.97	5	10	25.4289
A0A1D5NV17	Uncharacterized protein OS=Gallus gallus GN=ACTBL2 PE=3 SV=1 - [A0A1D5NV17_CHICK]	377	41.9867	5.31299	12	3	10	183	47.8901	22.55	7	17	47.8033	22.55	7	15	33.9052	22.55	7	11	45.1647	21.49	7	15	40.031	21.49	7	13	46.5404	21.49	7	15	58.4715	27.85	9	19	36.6057	17.51	6	14	49.9776	19.63	6	18	43.4712	21.49	7	15	25.4553
A0A1D5PHC5	Heat shock cognate protein HSP 90-beta OS=Gallus gallus GN=HSP90AB1 PE=3 SV=1 - [A0A1D5PHC5_CHICK]	694	79.9688	5.33838	5	1	14	171	42.088	15.56	11	14	43.6816	13.4	9	14	43.8284	11.82	10	14	45.2026	13.26	10	15	54.0745	16.86	13	18	36.4831	10.09	7	12	38.6446	13.26	11	13	48.7965	11.82	8	17	34.9682	11.67	8	12	32.7199	11.53	9	11	37.4148
A0A1D5PU94	Uncharacterized protein OS=Gallus gallus GN=LOC418892 PE=4 SV=1 - [A0A1D5PU94_CHICK]	1687	189.872	7.29834	2	18	18	64	37.9638	8.3	12	13	30.5304	7.41	10	10	51.0806	7.41	11	17	23.6406	4.68	7	8	13.4654	2.67	4	4	26.5611	5.28	8	9	0	0	0	0	0	0	0	0	0	0	0	0	0	0	0	0	7.08655
A0A1D5NXI4	Uncharacterized protein OS=Gallus gallus GN=TTC38 PE=4 SV=1 - [A0A1D5NXI4_CHICK]	374	42.3253	6.11279	2	1	7	91	30.7501	25.67	7	10	39.8451	21.39	6	13	48.7176	25.67	7	15	42.7189	21.39	6	14	36.2421	21.39	6	12	34.8887	21.39	6	11	12.2235	16.04	4	4	0	0	0	0	2.54426	4.55	1	1	7.26103	3.74	1	2	7.94705
E1BV78	Uncharacterized protein OS=Gallus gallus GN=FGG PE=4 SV=2 - [E1BV78_CHICK]	438	49.9232	5.73193	3	13	13	80	44.0393	22.15	11	15	34.867	22.15	11	12	30.6011	18.04	8	10	25.3149	14.16	6	9	31.7752	19.86	8	10	25.656	15.98	8	9	2.12335	1.6	1	1	2.29397	2.05	1	1	5.02676	4.57	2	2	8.32223	6.62	3	3	13.2562
A0A1D5PZV6	Elongation factor 2 OS=Gallus gallus GN=EEF2 PE=4 SV=1 - [A0A1D5PZV6_CHICK]	857	95.2409	6.7417	10	6	13	103	35.5627	11.9	9	12	29.2048	9.57	7	10	37.9082	10.97	8	12	30.6148	8.63	7	11	34.8415	9.68	7	11	37.5309	12.02	9	12	20.9987	6.88	5	7	16.5202	5.48	4	6	8.60295	4.08	3	3	13.5076	7	5	5	11.5154
A0A1L1RIW3	Tubulin beta chain OS=Gallus gallus GN=TUBB1 PE=3 SV=1 - [A0A1L1RIW3_CHICK]	330	37.2561	4.93213	2	2	9	136	33.6231	17.27	6	12	27.2383	20	6	10	34.0571	20.61	6	12	31.6708	20.91	7	11	24.867	21.21	6	9	28.7504	16.67	6	10	25.953	17.58	5	9	50.7261	12.12	4	18	22.2672	12.12	4	8	37.4672	20.61	6	13	37.2166
A0A1D5PS72	Uncharacterized protein OS=Gallus gallus GN=EEF1A1 PE=4 SV=1 - [A0A1D5PS72_CHICK]	352	38.7633	9.12939	17	3	8	101	33.219	19.32	6	11	34.1431	13.35	4	10	35.4096	15.91	5	10	28.1615	13.64	4	9	27.0812	13.64	4	9	39.7389	15.91	5	12	35.9011	20.17	7	12	13.7224	15.34	5	5	15.9199	13.64	4	5	29.0869	13.64	4	8	12.2805
A0A1D5PU77	ATP synthase subunit beta OS=Gallus gallus GN=ATP5B PE=3 SV=1 - [A0A1D5PU77_CHICK]	533	56.5937	5.65576	6	2	9	123	29.5024	16.89	7	10	31.0432	16.89	7	12	21.755	16.89	7	8	15.2938	12.38	5	5	30.1601	16.89	7	11	21.5796	16.89	7	8	24.6496	16.32	7	8	36.8344	16.7	7	14	41.9456	19.51	8	14	39.3898	21.39	9	14	20.2777
P01875	Ig mu chain C region OS=Gallus gallus PE=2 SV=2 - [IGHM_CHICK]	446	48.1428	6.41748	1	8	8	70	27.8462	13.68	5	9	39.132	17.26	7	13	21.412	11.66	4	7	16.4533	13.68	5	5	28.4491	11.43	4	8	35.3189	15.47	6	12	2.5683	2.91	1	1	0	0	0	0	2.78506	2.91	1	1	3.58529	2.91	1	1	32.9012
A0A1D5PPU9	Catalase OS=Gallus gallus GN=CAT PE=3 SV=1 - [A0A1D5PPU9_CHICK]	528	59.7918	7.84033	2	9	10	66	25.3773	18.75	8	9	26.8028	16.1	7	10	27.4039	15.72	7	9	23.3128	14.77	6	8	25.0167	15.15	6	10	22.5599	13.26	6	8	10.4235	4.73	2	4	0	0	0	0	2.71151	2.46	1	1	10.9715	4.73	2	4	7.96813
A0A1D5NTY5	Uncharacterized protein OS=Gallus gallus GN=LOC107049323 PE=3 SV=1 - [A0A1D5NTY5_CHICK]	802	88.8655	5.26221	9	3	11	120	37.4196	9.73	7	11	21.3439	6.73	4	6	32.5928	8.1	5	9	36.8349	9.6	6	11	31.9312	9.6	6	9	29.8082	6.61	5	9	46.077	13.59	9	14	13.9162	5.86	4	5	11.3208	5.99	4	4	56.9258	13.47	8	18	29.4904
F1NJR5	Uncharacterized protein OS=Gallus gallus PE=4 SV=3 - [F1NJR5_CHICK]	1848	202.236	5.92236	1	10	10	63	24.9887	4.82	6	8	26.1503	4.27	5	8	34.0241	5.57	7	10	28.4917	4.6	6	9	22.6413	3.03	4	7	26.0182	4	5	8	5.35892	0.81	1	2	0	0	0	0	0	0	0	0	2.16461	0.6	1	1	15.0319
A0A1D5PEU7	Uncharacterized protein OS=Gallus gallus GN=VNN1 PE=4 SV=1 - [A0A1D5PEU7_CHICK]	491	54.5711	5.41455	6	6	6	57	25.0189	11	4	8	34.4586	11	4	11	21.2593	11	4	7	18.564	10.39	4	6	18.9399	7.74	3	6	22.6291	7.74	3	8	9.85267	6.52	2	3	2.21196	2.44	1	1	3.23052	3.26	1	1	3.12387	3.26	1	1	3.2078
Q02020	Fibrinogen beta chain (Fragment) OS=Gallus gallus GN=FGB PE=1 SV=1 - [FIBB_CHICK]	463	52.6445	7.35693	2	13	13	63	16.0534	11.88	5	5	27.6088	22.68	9	10	29.734	22.68	9	10	8.39205	6.91	3	3	20.253	13.82	5	6	11.6674	9.5	4	4	0	0	0	0	4.50128	4.54	2	2	2.33803	1.94	1	1	16.9413	14.04	5	5	35.9122
A0A1L1RUX2	Eukaryotic initiation factor 4A-II OS=Gallus gallus GN=EIF4A2 PE=3 SV=1 - [A0A1L1RUX2_CHICK]	396	45.3945	6.02393	14	4	9	73	17.7761	10.86	4	6	28.1688	11.36	4	9	28.859	14.9	5	9	17.8401	7.83	3	5	27.1826	19.19	6	9	18.9068	11.36	4	6	9.04923	7.83	3	3	10.7442	4.55	2	4	9.18273	7.83	3	3	12.3016	7.83	3	4	17.4731
P13648	Lamin-A OS=Gallus gallus GN=LMNA PE=2 SV=1 - [LMNA_CHICK]	657	73.1204	6.94678	1	11	11	62	17.8901	8.68	5	7	17.7612	6.85	4	7	24.1841	8.52	5	9	12.9204	6.85	4	5	18.2686	7.91	5	7	16.7822	10.35	6	7	2.19005	1.67	1	1	13.6821	7.76	5	6	8.00284	3.2	2	3	0	0	0	0	11.9092
F1NVF3	Uncharacterized protein OS=Gallus gallus GN=GC PE=3 SV=1 - [F1NVF3_CHICK]	484	53.6811	6.87354	1	12	12	66	18.1315	13.43	6	7	20.5532	11.57	6	7	22.5022	15.91	8	8	10.8086	9.09	4	4	30.2926	15.91	8	11	23.6157	14.88	7	9	0	0	0	0	13.5112	9.09	4	5	11.1652	6.61	3	4	4.90775	4.55	2	2	19.6798
E1BX85	Uncharacterized protein OS=Gallus gallus GN=GSTO1 PE=4 SV=1 - [E1BX85_CHICK]	239	27.2059	7.44482	1	10	10	69	23.6679	36.4	9	9	17.8209	23.43	6	7	16.6158	26.36	6	6	9.75973	16.74	4	4	16.2972	28.87	6	6	12.2405	15.9	4	5	7.59041	15.48	3	3	10.1716	19.25	4	4	11.7876	11.3	3	5	14.3566	23.01	5	6	22.0224
A0A1D5PZC7	Transmembrane anterior posterior transformation protein 1 homolog OS=Gallus gallus GN=TAPT1 PE=4 SV=1 - [A0A1D5PZC7_CHICK]	570	64.3681	8.38232	2	2	2	62	10.7069	3.16	1	4	21.8924	3.16	1	8	24.8341	3.16	1	9	17.7069	3.16	1	7	33.9671	3.16	1	13	33.6071	3.16	1	13	2.62712	3.16	1	1	7.89281	3.16	1	3	5.28543	3.16	1	2	0	0	0	0	2.6646
P02552	Tubulin alpha-1 chain (Fragment) OS=Gallus gallus PE=1 SV=1 - [TBA1_CHICK]	412	45.8716	5.08447	9	0	11	100	17.6457	16.75	6	7	16.2186	15.05	5	6	23.7995	17.96	6	8	11.3075	11.17	4	4	21.5489	15.78	6	8	16.4426	14.08	5	6	42.1734	25	8	12	21.3077	17.48	6	8	16.2452	17.96	6	6	41.0007	21.6	7	13	27.3119
A0A1L1RK76	Tubulin alpha chain OS=Gallus gallus GN=TUBA1C PE=3 SV=1 - [A0A1L1RK76_CHICK]	441	49.0294	6.1001	14	0	11	93	17.6457	15.65	6	7	16.4692	14.06	5	6	23.2899	16.78	6	8	7.28632	7.26	3	3	17.0983	14.74	6	7	20.6507	13.15	5	7	37.9055	20.41	7	11	12.2399	10.2	4	5	12.4819	13.83	5	5	45.5678	23.36	8	15	20.9391
A0A1D5PIE3	Uncharacterized protein OS=Gallus gallus PE=4 SV=1 - [A0A1D5PIE3_CHICK]	204	22.8079	8.95361	3	1	5	46	23.5307	19.12	3	7	24.522	24.51	4	8	18.7163	24.51	4	6	24.4369	19.12	3	7	17.4831	19.12	3	5	15.3361	19.12	3	5	4.92021	12.25	2	2	0	0	0	0	0	0	0	0	6.97254	4.9	1	3	4.67377
P20763	Ig lambda chain C region OS=Gallus gallus PE=4 SV=1 - [LAC_CHICK]	103	11.3535	6.50732	2	2	2	61	17.6249	11.65	1	7	20.4439	20.39	2	8	15.1478	11.65	1	6	8.4385	11.65	1	3	15.004	11.65	1	6	10.4558	11.65	1	4	10.0481	11.65	1	4	15.2657	11.65	1	6	10.2849	11.65	1	4	8.14562	11.65	1	3	12.7836
A0A1D5PC92	Histone H2B OS=Gallus gallus GN=HIST1H2B5L PE=3 SV=1 - [A0A1D5PC92_CHICK]	126	13.9195	10.2427	6	3	5	34	24.5014	28.57	3	8	18.2167	35.71	4	7	12.741	26.98	3	5	6.20945	20.63	2	3	5.77292	20.63	2	2	5.56733	20.63	2	2	2.41177	8.73	1	1	4.3787	8.73	1	2	2.28863	8.73	1	1	2.31387	8.73	1	1	4.3672
P01012	Ovalbumin OS=Gallus gallus GN=SERPINB14 PE=1 SV=2 - [OVAL_CHICK]	386	42.8535	5.2876	1	7	7	89	27.3443	15.28	4	8	26.0433	15.28	4	7	13.2806	11.92	3	4	10.7806	11.92	3	3	18.8413	15.28	4	5	36.121	15.28	4	11	24.1834	16.06	4	7	28.7679	15.28	5	9	46.9025	15.28	4	14	36.5153	19.17	5	10	10.04
Q5ZMT0	14-3-3 protein epsilon OS=Gallus gallus GN=YWHAE PE=1 SV=1 - [1433E_CHICK]	255	29.1554	4.7417	7	2	7	75	14.2167	16.47	4	5	20.5118	20.78	5	8	14.95	16.47	4	6	18.3381	16.08	4	7	13.1404	16.08	4	5	15.9557	16.08	4	6	10.7711	11.76	3	4	21.4785	11.37	3	8	17.1661	11.37	3	6	17.5985	11.37	3	6	18.8559
A0A1D5PR64	Uncharacterized protein OS=Gallus gallus PE=4 SV=1 - [A0A1D5PR64_CHICK]	250	27.8296	8.52881	2	2	4	68	14.8012	12	3	5	24.2315	12	3	8	19.0884	12	3	6	19.1476	12.4	4	6	19.8315	12.4	4	7	15.0809	12	3	5	8.09496	12.4	3	3	8.96018	7.2	3	4	8.10602	12	3	3	13.9157	12.4	4	5	19.0229
A0A1L1RJP8	Tubulin alpha chain OS=Gallus gallus GN=TUBA4A PE=3 SV=1 - [A0A1L1RJP8_CHICK]	448	49.9384	5.05908	8	0	10	85	18.1161	15.63	6	7	11.8975	11.83	4	4	23.5727	16.74	6	8	7.08167	7.37	3	3	18.0985	14.73	6	7	21.2933	13.17	5	7	34.1537	19.87	7	10	12.2031	9.82	4	5	14.1608	13.39	5	5	37.722	19.87	7	12	19.9935
P00337	L-lactate dehydrogenase B chain OS=Gallus gallus GN=LDHB PE=1 SV=3 - [LDHB_CHICK]	333	36.295	7.43018	7	6	6	39	26.6034	17.72	5	9	11.2862	13.51	4	4	17.6647	17.72	5	6	18.0798	14.71	4	6	15.8716	14.71	4	5	11.7278	14.71	4	4	0	0	0	0	0	0	0	0	2.24508	3.6	1	1	0	0	0	0	8.5989
F1NZ78	Alpha-enolase OS=Gallus gallus GN=ENO1 PE=3 SV=3 - [F1NZ78_CHICK]	434	47.2764	6.80029	15	8	9	54	23.4195	15.44	5	7	18.9984	11.29	3	5	21.166	13.13	5	7	12.5341	9.45	3	4	15.5981	6.68	2	4	16.7554	13.36	5	6	15.7616	4.15	1	4	0	0	0	0	11.9255	6.91	2	4	13.9811	4.15	1	4	16.6359
F1NG97	AMP deaminase OS=Gallus gallus GN=AMPD3 PE=3 SV=2 - [F1NG97_CHICK]	765	88.8747	6.69775	1	6	6	27	23.4862	6.14	4	7	13.833	7.06	5	5	19.9984	6.14	4	7	8.61336	6.14	4	4	6.18281	3.14	2	2	4.3624	0.92	1	2	0	0	0	0	0	0	0	0	0	0	0	0	0	0	0	0	0
F1NBW2	V-type proton ATPase catalytic subunit A OS=Gallus gallus GN=ATP6V1A PE=3 SV=1 - [F1NBW2_CHICK]	617	68.3297	5.66846	6	5	6	59	13.0657	5.35	3	4	18.2751	6.32	3	6	23.9648	10.21	5	8	11.5624	3.89	2	4	19.1241	6.32	3	6	13.4141	6.32	3	4	13.9288	8.59	4	4	5.85707	3.89	2	2	18.8524	4.7	2	5	13.4185	4.7	2	4	11.5103
A0A1D5P719	Peroxiredoxin-1 OS=Gallus gallus GN=PRDX1 PE=4 SV=1 - [A0A1D5P719_CHICK]	100	11.302	8.63135	2	3	5	55	17.5537	52	5	6	14.4123	52	5	5	16.5418	52	5	6	9.71368	35	3	3	20.5927	43	4	7	14.5319	43	4	5	5.11136	21	2	2	9.17965	29	3	4	7.52129	21	2	3	10.9824	43	4	4	15.6706
P08267	Ferritin heavy chain OS=Gallus gallus GN=FTH PE=2 SV=2 - [FRIH_CHICK]	180	21.0783	6.21436	1	5	5	32	18.1728	22.78	4	7	10.3967	22.78	4	4	14.5076	22.78	4	6	7.545	11.67	2	3	7.91231	17.22	3	3	13.1146	22.78	4	5	0	0	0	0	0	0	0	0	2.41255	6.11	1	1	0	0	0	0	8.39444
H9L385	Hemopexin OS=Gallus gallus GN=HPX PE=4 SV=3 - [H9L385_CHICK]	388	43.356	5.5542	1	7	7	41	16.5435	10.31	3	7	12.7294	8.76	3	5	13.5244	6.44	2	5	4.30954	2.84	1	2	11.1609	6.44	2	4	12.5946	6.44	2	4	2.56593	2.84	1	1	0	0	0	0	8.90162	6.96	2	3	9.60185	9.54	3	3	12.4972
A0A1D5PB88	Rab GDP dissociation inhibitor OS=Gallus gallus GN=GDI2 PE=3 SV=1 - [A0A1D5PB88_CHICK]	405	45.4474	7.88428	5	6	6	35	25.2927	15.8	4	7	26.3691	18.02	5	7	12.8043	8.64	2	3	4.37587	3.95	1	1	22.4365	12.1	3	5	16.3269	12.35	3	4	2.5978	2.22	1	1	2.18572	2.22	1	1	2.12236	2.22	1	1	2.06635	2.22	1	1	7.40873
A0A1D5P6F4	Uncharacterized protein OS=Gallus gallus GN=LOC429249 PE=4 SV=1 - [A0A1D5P6F4_CHICK]	2099	229.027	5.47803	2	7	7	48	15.3182	1.91	3	4	13.6865	2.33	4	5	23.7866	2.33	4	7	15.975	1.81	3	5	13.0593	1.81	3	4	12.5348	2.33	4	4	3.37618	0.76	1	1	0	0	0	0	3.00666	0.62	1	1	3.29384	0.62	1	1	29.699
R4GFB3	Phosphoinositide phospholipase C OS=Gallus gallus GN=PLCB4 PE=4 SV=1 - [R4GFB3_CHICK]	1194	135.65	6.771	1	1	1	35	6.21244	1.42	1	3	13.8254	1.42	1	6	17.1924	1.42	1	7	9.9533	1.42	1	4	11.3957	1.42	1	5	6.63289	1.42	1	3	16.1261	1.42	1	7	0	0	0	0	0	0	0	0	0	0	0	0	0
F1P269	ATP-citrate synthase OS=Gallus gallus GN=ACLY PE=3 SV=2 - [F1P269_CHICK]	1091	120.066	7.62061	3	2	3	37	13.0472	3.48	3	5	7.79234	2.02	2	3	19.6651	3.48	3	7	6.89307	1.1	1	3	11.0678	2.57	2	4	10.8516	3.48	3	4	7.83645	2.02	2	3	2.83184	1.1	1	1	5.09926	2.02	2	2	3.27916	1.1	1	1	4.99348
A0A1L1RXL9	Vimentin OS=Gallus gallus GN=VIM PE=3 SV=1 - [A0A1L1RXL9_CHICK]	392	45.9811	4.84326	5	7	7	27	12.2321	8.42	3	4	18.8911	13.52	6	7	12.3745	10.97	4	4	4.6006	5.1	2	2	9.92241	11.22	4	4	11.1803	5.87	2	3	0	0	0	0	0	0	0	0	0	0	0	0	0	0	0	0	4.4852
A0A1L1RWK7	Uncharacterized protein OS=Gallus gallus PE=4 SV=1 - [A0A1L1RWK7_CHICK]	1393	159.979	8.38232	2	3	4	18	8.54566	3.09	3	4	16.7793	3.09	3	9	4.13773	2.01	2	2	4.22494	2.37	2	2	0	0	0	0	0	0	0	0	0	0	0	0	0	0	0	0	0	0	0	0	2.01523	0.86	1	1	0
A0A1D5PDF1	Glutathione S-transferase OS=Gallus gallus PE=3 SV=1 - [A0A1D5PDF1_CHICK]	219	25.4328	7.29834	4	6	6	31	13.7255	15.53	3	5	13.3159	21.92	4	5	11.6664	17.81	3	4	7.91734	17.81	3	3	17.8746	28.77	5	6	18.7014	27.4	5	7	2.32584	7.76	1	1	0	0	0	0	0	0	0	0	0	0	0	0	0
A0A1D5PIL5	14-3-3 protein theta OS=Gallus gallus GN=YWHAQ PE=3 SV=1 - [A0A1D5PIL5_CHICK]	236	27.1876	5.33838	8	1	4	65	14.9874	13.56	3	6	14.4611	10.17	2	5	5.93079	4.24	1	2	15.1802	16.95	4	6	15.1459	16.95	4	6	12.9805	11.02	3	5	8.28607	7.63	2	3	15.5122	11.02	3	6	17.0653	11.02	3	6	17.1114	11.02	3	6	19.4336
F1NMP3	Tubulin alpha chain OS=Gallus gallus GN=TUBA8B PE=3 SV=2 - [F1NMP3_CHICK]	440	49.0379	4.95752	9	0	8	62	12.0174	9.55	4	5	8.46845	7.95	3	3	14.0435	10.68	4	5	4.71438	5.23	2	2	14.9717	12.73	5	6	18.4114	11.14	4	6	27.3734	15	5	8	4.76008	4.77	2	2	9.8419	10.23	4	4	33.7904	17.95	6	11	10.5478
Q9W6J2	Glutathione S-transferase class-alpha OS=Gallus gallus GN=GSTA4 PE=2 SV=1 - [Q9W6J2_CHICK]	223	25.4235	8.83643	1	5	5	41	14.166	12.56	2	4	17.9416	24.66	5	6	9.23283	12.56	2	3	6.46031	10.31	2	2	14.5758	21.08	4	5	17.6146	19.73	4	6	8.17847	6.73	1	2	0	0	0	0	5.87427	6.73	1	2	11.4734	6.73	1	3	12.3842
A0A1D5PAP6	Uncharacterized protein OS=Gallus gallus GN=RNF121 PE=4 SV=1 - [A0A1D5PAP6_CHICK]	166	19.2327	7.76709	2	1	1	26	13.2406	7.83	1	6	10.826	7.83	1	5	4.29485	7.83	1	2	8.99196	7.83	1	4	6.63643	7.83	1	3	8.74564	7.83	1	4	0	0	0	0	0	0	0	0	2.09465	7.83	1	1	0	0	0	0	0
F1NW97	Tubulin alpha chain OS=Gallus gallus GN=TUBA4B PE=3 SV=3 - [F1NW97_CHICK]	448	49.9624	5.05908	5	1	8	45	12.127	10.71	4	5	8.34784	8.71	3	3	14.3882	8.71	3	5	8.21558	8.93	3	3	8.95732	6.7	3	4	7.71856	5.13	2	3	13.6966	8.93	3	4	2.36774	2.01	1	1	4.74208	5.13	2	2	22.3224	11.83	4	7	7.23893
O57535	Nucleoside diphosphate kinase OS=Gallus gallus PE=2 SV=1 - [NDK_CHICK]	153	17.2768	7.89893	10	4	4	31	14.3723	15.69	2	5	14.3103	23.53	3	5	8.6424	15.69	2	3	6.62572	9.15	1	2	16.4569	20.26	2	5	8.90877	16.99	2	3	2.8041	9.15	1	1	0	0	0	0	0	0	0	0	2.65583	9.15	1	1	9.28567
E1C7P4	Uncharacterized protein OS=Gallus gallus GN=CFH PE=4 SV=2 - [E1C7P4_CHICK]	1306	147.76	7.04932	1	7	7	26	9.20417	2.83	3	4	10.5005	2.83	3	4	12.0798	2.83	3	5	2.16377	0.84	1	1	8.67535	3.45	4	4	14.0814	1.99	2	5	0	0	0	0	2.1651	1	1	1	0	0	0	0	0	0	0	0	5.38655
Q5ZLQ6	14-3-3 protein beta/alpha OS=Gallus gallus GN=YWHAB PE=2 SV=1 - [1433B_CHICK]	244	27.8898	4.83057	6	1	5	64	9.98894	11.07	3	4	15.6454	9.84	2	5	9.28495	9.84	2	3	13.0341	10.66	3	5	12.2322	14.34	4	5	17.4088	14.34	4	7	8.28607	7.38	2	3	15.5122	10.66	3	6	17.0653	10.66	3	6	17.1114	10.66	3	6	19.4336
F1NDN6	Uncharacterized protein OS=Gallus gallus PE=3 SV=3 - [F1NDN6_CHICK]	509	53.6847	5.0083	3	2	4	41	12.8554	5.5	4	5	11.1586	1.96	2	4	8.77368	4.13	3	3	10.0253	4.13	3	4	8.35517	1.96	2	3	11.0136	4.13	3	4	4.44146	3.54	2	2	10.8048	4.13	3	4	13.3404	4.13	3	5	2.96997	2.16	1	1	10.8789
P09644	Tubulin alpha-5 chain OS=Gallus gallus PE=3 SV=1 - [TBA5_CHICK]	448	49.9164	5.05908	3	0	7	49	9.83244	7.37	3	4	8.46845	7.81	3	3	14.0435	10.49	4	5	2.56917	3.13	1	1	12.8594	10.49	4	5	16.1505	8.93	3	5	16.2157	8.93	3	5	2.39234	2.68	1	1	7.37985	8.04	3	3	20.6699	11.83	4	7	8.26097
P14448	Fibrinogen alpha chain OS=Gallus gallus GN=FGA PE=1 SV=4 - [FIBA_CHICK]	741	82.3871	6.06201	2	3	3	27	11.0778	4.05	2	3	11.7675	4.05	2	4	18.3548	4.05	2	5	6.88319	4.05	2	2	10.9573	4.05	2	3	16.0096	4.05	2	5	0	0	0	0	0	0	0	0	6.02666	2.16	1	2	0	0	0	0	8.9739
A0A1L1S0N7	Antithrombin-III OS=Gallus gallus GN=SERPINC1 PE=3 SV=1 - [A0A1L1S0N7_CHICK]	421	47.8997	6.58057	2	7	8	26	9.58009	9.5	4	4	12.2835	12.59	5	5	7.24274	7.36	3	3	5.99352	5.46	2	2	7.66119	7.13	3	3	11.5689	9.74	4	4	0	0	0	0	2.0281	2.14	1	1	0	0	0	0	2.40354	3.33	1	1	6.63505
A0A1D5NWB8	Uncharacterized protein OS=Gallus gallus GN=ROCK2 PE=4 SV=1 - [A0A1D5NWB8_CHICK]	1235	142.504	5.36377	2	3	4	37	15.1923	1.86	2	6	9.89074	1.05	1	4	5.60314	1.05	1	2	7.08674	3.24	3	3	5.30939	1.05	1	2	8.22553	1.05	1	3	5.28271	1.05	2	2	10.6559	1.05	1	4	7.92741	1.05	1	3	5.00743	1.05	1	2	10.6197
A0A1L1RQ91	Uncharacterized protein OS=Gallus gallus GN=GPI PE=4 SV=1 - [A0A1L1RQ91_CHICK]	232	26.0921	8.33838	15	2	2	34	11.7816	12.93	2	3	14.5842	12.93	2	4	19.0294	12.93	2	5	4.99509	6.47	1	1	12.4655	12.93	2	3	14.6277	12.93	2	4	16.4289	12.93	2	4	0	0	0	0	11.3085	6.47	1	3	14.9374	12.93	2	4	6.45566
F6QGI8	Uncharacterized protein OS=Gallus gallus GN=FBP1 PE=3 SV=2 - [F6QGI8_CHICK]	339	36.707	7.94287	2	4	4	16	16.2259	13.86	4	6	7.72877	10.32	3	3	7.60915	10.32	3	3	0	0	0	0	2.65668	3.54	1	1	7.23494	10.32	3	3	0	0	0	0	0	0	0	0	0	0	0	0	0	0	0	0	0
P11682	Apolipoprotein B (Fragment) OS=Gallus gallus GN=APOB PE=2 SV=1 - [APOB_CHICK]	433	50.8156	8.23584	1	1	6	17	6.07289	5.31	2	2	9.47472	8.31	3	3	21.2821	15.94	6	7	0	0	0	0	0	0	0	0	6.22116	7.16	3	3	0	0	0	0	0	0	0	0	0	0	0	0	0	0	0	0	4.84562
F1NMY1	14-3-3 protein gamma OS=Gallus gallus GN=YWHAG PE=3 SV=3 - [F1NMY1_CHICK]	247	28.2849	4.89404	7	2	6	65	12.3351	14.98	4	5	11.577	8.1	2	4	5.93079	4.05	1	2	13.0341	10.53	3	5	12.2322	14.17	4	5	19.9246	18.22	5	8	8.28607	7.29	2	3	15.5122	10.53	3	6	17.0653	10.53	3	6	17.1114	10.53	3	6	22.2448
F1NA58	Uncharacterized protein OS=Gallus gallus GN=SERPING1 PE=3 SV=3 - [F1NA58_CHICK]	536	58.0963	6.27783	1	3	3	26	16.3026	8.58	3	5	7.58726	5.22	2	3	9.93517	8.58	3	3	8.22454	5.22	2	3	12.8778	8.58	3	4	11.4204	8.58	3	4	0	0	0	0	0	0	0	0	0	0	0	0	3.2947	2.43	1	1	8.86795
A0A1L1RIN7	Hemoglobin subunit alpha-A OS=Gallus gallus GN=HBAA PE=3 SV=1 - [A0A1L1RIN7_CHICK]	96	10.2636	8.51416	1	1	5	98	10.3875	34.38	4	4	10.503	34.38	4	4	7.21126	32.29	3	3	2.39102	11.46	1	1	5.4145	23.96	2	2	13.9066	34.38	4	5	12.403	21.88	2	4	26.8131	23.96	2	9	11.6445	23.96	2	4	29.5905	21.88	2	10	90.8953
A0A1L1RNH2	Uncharacterized protein OS=Gallus gallus GN=PSMC2 PE=3 SV=1 - [A0A1L1RNH2_CHICK]	372	41.7345	5.2749	2	1	6	39	8.05524	10.48	3	3	8.58749	10.48	3	3	15.2371	16.67	5	5	5.32839	7.26	2	2	10.6267	7.53	2	3	7.95757	10.48	3	3	26.1621	21.51	6	8	2.31472	2.69	1	1	3.63327	3.49	1	1	7.6748	11.02	3	3	10.5477
A0A1D5PF76	Uncharacterized protein OS=Gallus gallus GN=USP9X PE=3 SV=1 - [A0A1D5PF76_CHICK]	2511	285.39	5.8208	3	2	3	23	6.93611	0.88	2	3	9.20795	0.88	2	4	8.62991	0.88	2	4	4.39277	0.88	2	2	4.67052	0.52	1	2	4.60969	0.52	1	2	2.17336	0.52	1	1	4.27109	0.88	2	2	2.37242	0.52	1	1	0	0	0	0	2.0666
Q5ZHZ0	Spliceosome RNA helicase DDX39B OS=Gallus gallus GN=DDX39B PE=2 SV=1 - [DX39B_CHICK]	428	48.9719	5.66846	4	1	3	26	3.01624	2.8	1	1	11.0188	8.41	3	4	17.1998	8.41	3	6	2.76628	2.8	1	1	2.99674	2.8	1	1	6.14907	5.14	2	2	6.43889	5.14	2	2	7.9552	2.34	1	3	6.0674	5.14	2	2	6.59194	5.14	2	2	3.16873
F1NQD9	Radixin OS=Gallus gallus GN=RDX PE=4 SV=3 - [F1NQD9_CHICK]	583	68.5703	6.3667	7	1	5	34	16.6644	6.35	3	5	5.51381	3.6	2	2	8.92539	6.35	3	3	8.76237	6.35	3	3	12.0022	6.35	3	4	29.7675	7.89	5	11	9.75974	6.35	3	3	0	0	0	0	0	0	0	0	0	0	0	0	0
A0A1D5P9P3	Alpha-actinin-1 OS=Gallus gallus GN=ACTN1 PE=4 SV=1 - [A0A1D5P9P3_CHICK]	885	102.362	5.5542	6	5	7	25	12.3933	5.42	4	4	13.4492	2.82	3	4	5.63578	2.94	2	2	3.28219	1.58	1	1	19.2455	5.31	5	6	13.2655	6.55	5	5	8.06451	2.71	2	2	0	0	0	0	0	0	0	0	3.52594	1.13	1	1	0
A0A1I7Q3Y7	GTP-binding nuclear protein Ran OS=Gallus gallus GN=RAN PE=3 SV=1 - [A0A1I7Q3Y7_CHICK]	205	23.2281	7.88428	16	3	3	31	11.2977	17.07	3	4	10.1993	17.07	3	4	5.82914	12.2	2	2	8.20233	17.07	3	3	11.2772	17.07	3	4	7.79793	17.07	3	3	11.0225	17.07	3	4	2.24192	5.37	1	1	2.66821	5.37	1	1	5.83885	12.2	2	2	2.46981
A0A1L1RVH7	Hematopoietic prostaglandin D synthase OS=Gallus gallus GN=HPGDS PE=4 SV=1 - [A0A1L1RVH7_CHICK]	171	19.2261	6.20166	2	4	4	26	12.29	19.88	4	4	9.12863	19.3	3	3	10.3806	19.3	3	3	9.42498	19.3	3	3	8.48462	19.3	3	3	11.6	19.88	4	4	0	0	0	0	0	0	0	0	2.99682	5.26	1	1	0	0	0	0	5.03108
F1NW43	Pyruvate kinase OS=Gallus gallus GN=PKM PE=3 SV=2 - [F1NW43_CHICK]	530	57.8368	7.86963	4	4	6	22	7.95287	7.36	3	3	7.31237	6.79	3	3	11.4111	9.81	4	4	5.32991	4.15	2	2	5.01854	4.15	2	2	8.39181	6.6	3	3	2.07311	2.08	1	1	2.37808	2.08	1	1	2.11059	2.08	1	1	0	0	0	0	2.33849
F1NEQ4	Uncharacterized protein OS=Gallus gallus PE=4 SV=4 - [F1NEQ4_CHICK]	1355	152.863	6.22705	1	6	7	19	10.2292	3.32	4	4	7.49188	2.8	3	3	7.00405	2.29	3	3	4.92089	1.55	2	2	4.93184	0.74	1	2	5.25198	1.7	2	2	2.05945	1.18	1	1	0	0	0	0	0	0	0	0	2.02008	0.74	1	1	0
F1NIU3	Uncharacterized protein OS=Gallus gallus GN=ITIH2 PE=4 SV=3 - [F1NIU3_CHICK]	948	106.672	7.2251	1	5	5	16	10.7216	4.22	4	4	9.10727	4.01	4	4	4.33927	1.69	2	2	2.24586	1.27	1	1	4.94742	2.32	2	2	6.77813	2.85	2	3	0	0	0	0	0	0	0	0	0	0	0	0	0	0	0	0	0
A0A1D5PC67	Uncharacterized protein OS=Gallus gallus GN=C5 PE=4 SV=1 - [A0A1D5PC67_CHICK]	814	91.3499	6.81494	3	7	7	14	7.12327	2.7	2	3	2.71639	1.47	1	1	15.9095	7.49	5	6	2.55353	1.72	1	1	2.55494	1.47	1	1	5.32338	3.19	2	2	0	0	0	0	0	0	0	0	0	0	0	0	0	0	0	0	0
A0A1L1S015	Uncharacterized protein OS=Gallus gallus GN=ZRANB1 PE=4 SV=1 - [A0A1L1S015_CHICK]	694	79.2599	5.80811	3	2	2	17	11.3582	1.73	1	5	4.3064	1.73	1	2	6.39859	1.73	1	3	2.21593	1.73	1	1	2.08768	1.73	1	1	2.35353	1.73	1	1	2.29417	2.31	1	1	2.05587	1.73	1	1	2.01533	1.73	1	1	0	0	0	0	2.17426
E1BUN2	Uncharacterized protein OS=Gallus gallus GN=EXOC4 PE=4 SV=2 - [E1BUN2_CHICK]	976	110.982	6.55127	1	1	1	15	12.9312	1.33	1	5	6.10621	1.33	1	2	8.07202	1.33	1	3	3.07469	1.33	1	1	2.72973	1.33	1	1	2.58111	1.33	1	1	0	0	0	0	0	0	0	0	3.05798	1.33	1	1	0	0	0	0	0
F1NSP7	26S protease regulatory subunit 4 OS=Gallus gallus GN=PSMC1 PE=3 SV=3 - [F1NSP7_CHICK]	440	49.1677	6.21436	16	1	4	45	11.5612	9.09	3	3	10.9563	6.14	2	3	8.74893	8.86	3	3	17.3978	6.14	2	5	13.4156	6.14	2	4	16.5196	11.82	4	5	10.383	8.86	3	3	8.37879	5.45	2	3	7.56675	2.73	1	3	19.8389	8.86	3	6	8.54196
F1NEQ6	Proteasome subunit alpha type OS=Gallus gallus GN=PSMA6 PE=3 SV=2 - [F1NEQ6_CHICK]	246	27.4528	6.55127	11	5	5	30	6.40426	13.41	3	3	7.34093	9.35	2	3	8.1982	9.35	2	3	12.721	13.82	3	5	7.10894	5.28	1	3	9.1898	13.41	3	4	2.8062	4.07	1	1	2.00791	3.66	1	1	0	0	0	0	4.64606	8.94	2	2	8.99657
F1NW23	Clathrin heavy chain OS=Gallus gallus GN=CLTC PE=3 SV=2 - [F1NW23_CHICK]	1675	191.489	5.74463	3	1	4	33	7.61925	1.55	2	3	5.62469	0.66	1	2	12.331	1.55	2	4	14.2238	1.55	2	5	13.3379	1.55	2	4	6.68207	1.55	2	2	0	0	0	0	5.66142	0.66	1	2	0	0	0	0	8.86132	1.49	2	3	15.3325
A0A1L1RML6	Uncharacterized protein OS=Gallus gallus GN=IGLL1 PE=4 SV=1 - [A0A1L1RML6_CHICK]	102	10.7341	6.50732	1	1	1	28	10.2602	16.67	1	3	11.6643	16.67	1	3	9.53995	16.67	1	3	14.8372	16.67	1	4	10.0678	16.67	1	3	14.2598	16.67	1	4	3.85171	16.67	1	1	0	0	0	0	3.57652	16.67	1	1	9.20121	16.67	1	2	9.97412
F1NN49	Delta-aminolevulinic acid dehydratase OS=Gallus gallus GN=ALAD PE=3 SV=2 - [F1NN49_CHICK]	336	36.4462	7.38623	1	5	5	26	18.8596	13.69	3	5	4.08488	4.76	1	1	11.9293	8.93	2	3	15.6583	12.5	3	5	14.5733	11.9	3	4	8.1302	4.76	1	2	3.68655	4.76	1	1	3.50484	4.76	1	1	0	0	0	0	0	0	0	0	4.42819
A0A1L1RKY2	T-complex protein 1 subunit eta OS=Gallus gallus GN=CCT7 PE=3 SV=1 - [A0A1L1RKY2_CHICK]	367	40.3675	5.8208	8	1	4	31	9.30103	7.08	2	3	11.3766	7.08	2	4	5.69379	3.81	1	2	12.3685	7.08	2	4	9.05787	7.08	2	3	9.08804	7.08	2	3	16.175	9.81	3	6	2.07255	3.81	1	1	6.51963	3.81	1	2	2.77989	3.81	1	1	3.71987
A0A1D5P1W7	Uncharacterized protein OS=Gallus gallus PE=4 SV=1 - [A0A1D5P1W7_CHICK]	1099	119.865	6.06201	1	6	6	17	15.9018	6.19	5	5	2.66307	1.09	1	1	9.66199	3.91	3	3	2.35335	1.09	1	1	12.0893	3.73	3	4	8.83095	1.91	2	3	0	0	0	0	0	0	0	0	0	0	0	0	0	0	0	0	0
A0A1D5NU50	Fibronectin OS=Gallus gallus GN=FN1 PE=4 SV=1 - [A0A1D5NU50_CHICK]	2223	245.423	5.89697	4	4	5	17	6.16222	1.3	2	2	10.7271	1.12	2	3	11.7791	1.8	3	4	2.78238	0.63	1	1	2.81932	0.63	1	1	8.99388	1.3	2	3	2.54954	0.72	1	1	0	0	0	0	2.06123	0.58	1	1	0	0	0	0	2.41533
E1C7A7	Uncharacterized protein OS=Gallus gallus GN=VTN PE=4 SV=2 - [E1C7A7_CHICK]	453	51.6178	5.35107	2	3	3	22	13.3656	8.61	3	4	2.99536	2.65	1	1	9.73347	6.62	2	3	6.87711	4.64	2	3	14.3735	8.61	3	5	8.29242	5.96	2	3	0	0	0	0	2.12842	2.65	1	1	0	0	0	0	0	0	0	0	3.10886
A0A1D5PMQ5	Uncharacterized protein OS=Gallus gallus GN=LOC420039 PE=3 SV=2 - [A0A1D5PMQ5_CHICK]	499	53.9651	4.98291	4	1	3	30	4.61153	4.01	2	2	6.71175	3.21	2	3	7.7761	4.01	2	3	14.5125	4.01	2	6	5.1005	1.8	1	2	5.26303	4.01	2	2	4.30616	4.01	2	2	8.03444	4.01	2	3	7.8157	4.01	2	3	2.96997	2.2	1	1	5.22831
G1K303	Hydroxyacylglutathione hydrolase, mitochondrial OS=Gallus gallus GN=HAGH PE=3 SV=3 - [G1K303_CHICK]	260	29.0127	6.90283	3	4	4	18	9.72399	17.31	4	4	5.41357	9.23	2	2	4.88056	9.23	2	2	11.2797	14.23	3	5	7.8841	9.62	2	3	5.30141	4.62	1	2	0	0	0	0	0	0	0	0	0	0	0	0	0	0	0	0	0
F1NIB4	Uncharacterized protein OS=Gallus gallus GN=HNRNPAB PE=4 SV=4 - [F1NIB4_CHICK]	285	32.3128	10.521	2	1	1	17	11.718	4.91	1	4	7.11608	4.91	1	2	7.12805	4.91	1	2	11.7557	4.91	1	4	9.57812	4.91	1	3	5.47675	4.91	1	2	0	0	0	0	0	0	0	0	0	0	0	0	0	0	0	0	0
P00698	Lysozyme C OS=Gallus gallus GN=LYZ PE=1 SV=1 - [LYSC_CHICK]	147	16.228	9.0708	1	2	2	31	13.6199	19.05	2	4	3.12812	8.16	1	1	9.99164	8.16	1	3	7.07056	8.16	1	2	9.60557	19.05	2	3	11.4925	19.05	2	3	2.51909	8.16	1	1	14.8575	19.05	2	4	15.774	19.05	2	4	5.83358	8.16	1	2	3.81858
P27731	Transthyretin OS=Gallus gallus GN=TTR PE=1 SV=1 - [TTHY_CHICK]	150	16.2991	5.23682	2	3	3	27	9.10416	15.33	2	3	5.82724	15.33	2	2	8.18215	22	3	3	3.47147	8.67	1	1	8.59032	15.33	2	3	8.382	15.33	2	3	0	0	0	0	12.3629	22	3	5	2.47406	8.67	1	1	6.15885	15.33	2	2	5.07978
E1C7T1	Uncharacterized protein OS=Gallus gallus GN=SERPINA1 PE=3 SV=1 - [E1C7T1_CHICK]	425	48.6834	6.53662	1	8	8	17	3.12704	2.35	1	1	5.88788	4.94	2	2	11.8023	10.12	5	5	13.2744	6.59	2	3	3.10526	2.35	1	1	8.03144	8	3	3	0	0	0	0	0	0	0	0	0	0	0	0	0	0	0	0	3.13949
P49702	ADP-ribosylation factor 5 OS=Gallus gallus GN=ARF5 PE=2 SV=2 - [ARF5_CHICK]	180	20.4666	6.56592	14	2	4	33	5.28859	14.44	2	2	5.63946	11.67	2	2	11.3508	20	3	4	6.18399	11.67	2	2	4.7253	6.11	1	2	2.76953	5.56	1	1	5.29255	11.67	2	2	12.0956	11.67	2	4	11.9223	11.67	2	4	10.3883	13.33	2	3	7.51547
A0A1D5P7C6	Uncharacterized protein OS=Gallus gallus GN=PA2G4 PE=4 SV=1 - [A0A1D5P7C6_CHICK]	394	43.7522	6.75635	3	5	5	15	7.73966	9.39	3	3	6.78576	5.84	2	3	4.65328	5.84	2	2	5.04114	5.08	2	2	5.49764	4.31	1	2	2.23184	2.28	1	1	0	0	0	0	0	0	0	0	0	0	0	0	2.46688	2.28	1	1	2.02478
P15575	Band 3 anion transport protein OS=Gallus gallus GN=SLC4A1 PE=2 SV=1 - [B3AT_CHICK]	922	102.158	6.7417	3	3	3	21	3.66358	1.3	1	1	7.74591	2.6	2	3	9.74577	2.6	2	4	5.39136	1.3	1	2	2.42328	1.3	1	1	3.05294	1.3	1	1	2.05825	1.41	1	1	7.87453	1.3	1	3	6.0853	1.3	1	2	3.02409	1.3	1	1	3.30659
A0A1D5PH95	Uncharacterized protein OS=Gallus gallus GN=RASAL2 PE=4 SV=1 - [A0A1D5PH95_CHICK]	1139	128.444	8.22119	4	3	3	18	7.64389	1.14	1	3	6.95045	2.28	2	3	5.2984	1.14	1	2	2.5891	1.14	1	1	2.5167	1.14	1	1	4.64851	1.14	1	2	4.09951	2.02	2	2	2.21578	0.88	1	1	2.12924	1.14	1	1	2.86551	1.14	1	1	2.57731
Q5ZME2	Malate dehydrogenase, cytoplasmic OS=Gallus gallus GN=MDH1 PE=2 SV=1 - [MDHC_CHICK]	334	36.5202	7.35693	6	2	2	12	4.78378	6.89	2	2	10.4004	6.89	2	4	5.81253	6.89	2	2	2.44447	3.89	1	1	4.65521	6.89	2	2	2.00421	2.99	1	1	0	0	0	0	0	0	0	0	0	0	0	0	0	0	0	0	0
A0A1D5PNL3	Uncharacterized protein OS=Gallus gallus GN=UBE2N PE=3 SV=1 - [A0A1D5PNL3_CHICK]	152	17.127	6.56592	6	1	3	13	8.72391	17.11	2	3	7.57602	17.11	2	3	5.08616	7.24	1	2	3.33773	9.87	1	1	0	0	0	0	5.574	17.11	2	2	2.13882	5.26	1	1	0	0	0	0	0	0	0	0	0	0	0	0	0
A0A1D5NXQ1	Uncharacterized protein OS=Gallus gallus GN=LECT2 PE=4 SV=1 - [A0A1D5NXQ1_CHICK]	224	24.6774	8.85107	3	1	2	12	10.7409	6.7	1	3	8.71085	6.7	1	2	12.044	6.7	1	3	0	0	0	0	4.98588	6.7	1	2	2.66997	6.7	1	1	0	0	0	0	0	0	0	0	0	0	0	0	0	0	0	0	2.15111
A0A1L1RZ68	Glyceraldehyde-3-phosphate dehydrogenase OS=Gallus gallus GN=GAPDH PE=4 SV=1 - [A0A1L1RZ68_CHICK]	231	24.5275	8.14795	20	3	3	16	8.37031	6.49	1	3	4.55213	6.49	1	2	6.90872	12.55	2	3	0	0	0	0	5.12276	6.49	1	2	0	0	0	0	0	0	0	0	0	0	0	0	0	0	0	0	0	0	0	0	4.4764
A0A1L1RRT9	14-3-3 protein zeta OS=Gallus gallus GN=YWHAZ PE=3 SV=1 - [A0A1L1RRT9_CHICK]	224	25.2825	4.80518	8	2	4	53	5.52071	4.46	1	2	9.02963	4.46	1	3	5.93079	4.46	1	2	14.6144	14.29	3	5	14.3959	19.64	4	5	15.4088	13.39	3	6	8.28607	8.04	2	3	13.2689	8.04	2	5	14.321	8.04	2	5	14.3712	8.04	2	5	16.7649
Q5ZMF6	Uncharacterized protein OS=Gallus gallus GN=TRAP1 PE=2 SV=1 - [Q5ZMF6_CHICK]	704	79.6262	7.09326	1	2	3	30	10.4068	3.69	2	3	10.4402	3.69	2	3	4.21533	1.99	1	1	9.9907	3.98	2	3	10.4639	3.69	2	3	0	0	0	0	12.0911	3.69	2	4	8.07986	3.69	2	3	8.16386	3.69	2	3	4.33878	1.99	1	1	7.80034
P02659	Apovitellenin-1 OS=Gallus gallus PE=1 SV=1 - [APOV1_CHICK]	106	11.9585	9.11475	1	3	3	17	6.85209	25.47	2	2	7.13782	25.47	2	2	9.79818	25.47	2	3	2.10481	8.49	1	1	4.51859	16.98	1	1	8.3354	33.02	3	3	2.50886	8.49	1	1	0	0	0	0	2.25478	8.49	1	1	0	0	0	0	5.10843
A0A1D5PG93	Uncharacterized protein OS=Gallus gallus GN=TBC1D31 PE=4 SV=1 - [A0A1D5PG93_CHICK]	999	117.233	7.84033	2	1	1	12	7.0473	1.3	1	3	4.77992	1.3	1	2	4.62288	1.3	1	2	2.07142	1.3	1	1	0	0	0	0	7.15806	1.3	1	3	2.33709	1.3	1	1	0	0	0	0	0	0	0	0	0	0	0	0	0
A0A1D5PIP3	Uncharacterized protein OS=Gallus gallus GN=CAPN1 PE=3 SV=1 - [A0A1D5PIP3_CHICK]	621	70.4803	6.68311	2	4	4	11	10.9582	5.8	3	4	3.01664	1.93	1	1	6.11456	4.19	2	2	5.37059	1.93	1	2	3.06868	1.93	1	1	3.39842	1.93	1	1	0	0	0	0	0	0	0	0	0	0	0	0	0	0	0	0	0
E1BQF5	Uncharacterized protein OS=Gallus gallus GN=FAM83F PE=4 SV=3 - [E1BQF5_CHICK]	540	61.5814	8.30908	1	1	1	12	7.4147	2.22	1	3	2.33253	2.22	1	1	6.83413	2.22	1	3	2.12239	2.22	1	1	0	0	0	0	4.70904	2.22	1	2	4.37881	2.22	1	2	0	0	0	0	0	0	0	0	0	0	0	0	0
A0A1D5PBP6	Uncharacterized protein OS=Gallus gallus GN=CP PE=3 SV=1 - [A0A1D5PBP6_CHICK]	1079	123.133	6.23975	1	1	1	10	9.16429	1.39	1	3	6.26761	1.39	1	2	6.05372	1.39	1	2	0	0	0	0	6.09174	1.39	1	2	2.39212	1.39	1	1	0	0	0	0	0	0	0	0	0	0	0	0	0	0	0	0	0
F1NP06	Uncharacterized protein OS=Gallus gallus PE=4 SV=3 - [F1NP06_CHICK]	1279	146.092	6.78564	1	1	1	14	4.25129	1.02	1	2	6.63141	1.02	1	3	4.52592	1.02	1	2	0	0	0	0	2.13178	1.02	1	1	2.0197	1.02	1	1	4.87021	1.02	1	2	4.76912	1.02	1	2	2.59815	1.02	1	1	0	0	0	0	0
F1NQA5	Uncharacterized protein OS=Gallus gallus PE=4 SV=3 - [F1NQA5_CHICK]	475	56.1781	9.27588	1	1	2	14	4.76083	2.32	1	2	6.40826	4.84	2	3	4.46374	2.32	1	2	2.13999	2.32	1	1	0	0	0	0	2.57652	2.32	1	1	2.21599	2.32	1	1	0	0	0	0	4.28801	2.32	1	2	4.24693	2.32	1	2	0
R4GFU1	Poly [ADP-ribose] polymerase OS=Gallus gallus GN=PARP14 PE=4 SV=2 - [R4GFU1_CHICK]	1712	192.71	7.47412	2	2	4	13	5.38315	0.93	1	2	6.53078	2.16	3	3	4.11457	0.58	1	2	2.59789	0.93	1	1	2.74193	0.93	1	1	0	0	0	0	2.95343	0.93	1	1	2.13524	0.64	1	1	0	0	0	0	5.34724	0.93	1	2	0
Q5ZIT7	Uncharacterized protein OS=Gallus gallus GN=PSMC3 PE=2 SV=1 - [Q5ZIT7_CHICK]	422	47.1684	5.22412	1	2	5	40	11.6647	7.35	2	3	3.75084	3.79	1	1	6.31572	7.35	2	2	20.1111	13.98	5	6	13.9484	9.95	3	4	11.3746	9.72	3	4	30.5208	10.19	4	8	0	0	0	0	2.67571	2.37	1	1	15.407	7.82	3	4	5.03534
A0A1D5PXB1	Bifunctional purine biosynthesis protein PURH OS=Gallus gallus GN=ATIC PE=4 SV=1 - [A0A1D5PXB1_CHICK]	533	58.2871	8.30908	8	2	4	34	6.01298	2.63	1	2	8.85472	2.63	1	3	3.14903	2.63	1	1	8.74432	2.63	1	3	11.6629	5.44	2	4	6.09967	2.63	1	2	5.91493	6	2	2	14.9261	4.69	2	5	8.06231	4.69	2	3	6.13283	4.69	2	2	7.96313
F1NM49	Uncharacterized protein OS=Gallus gallus GN=MYH15 PE=3 SV=4 - [F1NM49_CHICK]	1937	223.464	5.80811	2	2	3	29	4.86904	1.34	2	2	4.25809	1.34	2	2	4.83942	1.34	2	2	4.52123	1.34	2	2	4.82682	1.29	2	2	9.94877	1.96	3	4	7.29722	1.96	3	3	0	0	0	0	9.71704	1.96	3	4	6.01284	0.67	1	2	8.19259
Q5ZLP4	Serine/threonine-protein phosphatase 2A 55 kDa regulatory subunit B OS=Gallus gallus GN=PPP2R2A PE=2 SV=1 - [Q5ZLP4_CHICK]	447	51.6934	6.20166	14	2	2	20	6.02498	5.59	2	2	7.25725	5.59	2	3	3.63221	3.13	1	1	5.04401	5.59	2	2	8.33096	5.59	2	3	9.13398	5.59	2	3	4.04834	3.13	1	1	0	0	0	0	0	0	0	0	2.74591	2.46	1	1	5.20062
A0A1L1RYB8	Uncharacterized protein OS=Gallus gallus GN=RPS3 PE=4 SV=1 - [A0A1L1RYB8_CHICK]	149	16.3509	10.2134	9	2	3	23	5.11328	14.09	2	2	2.59648	8.72	1	1	7.30393	14.09	2	3	7.72645	14.09	2	3	5.44864	14.09	2	2	5.71663	14.09	2	2	7.68536	24.83	3	3	5.92326	8.72	1	2	3.47079	8.72	1	1	2.14473	5.37	1	1	2.14173
E1C080	Uncharacterized protein OS=Gallus gallus GN=RAB8B PE=4 SV=3 - [E1C080_CHICK]	207	23.5721	9.05615	93	1	3	23	5.43527	10.63	2	2	2.5032	5.31	1	1	7.59914	14.49	3	3	7.40438	14.49	3	3	4.85722	10.63	2	2	4.95213	10.63	2	2	5.3928	10.63	2	2	2.21627	5.31	1	1	2.60023	5.31	1	1	5.30921	10.63	2	2	4.64006
A0A1D5NTU8	Uncharacterized protein OS=Gallus gallus GN=KRT75L4 PE=3 SV=1 - [A0A1D5NTU8_CHICK]	709	70.0449	7.1958	4	3	4	19	5.2392	3.1	2	2	7.74163	4.8	3	3	2.56293	1.69	1	1	6.31592	3.39	2	2	4.50032	4.09	2	2	4.8598	3.1	2	2	2.45512	1.69	1	1	4.36984	1.69	1	2	4.93005	1.69	1	2	2.38112	1.69	1	1	2.73681
A0A1D5P0U5	Uncharacterized protein OS=Gallus gallus PE=3 SV=2 - [A0A1D5P0U5_CHICK]	343	38.8746	4.58936	30	1	4	26	2.15995	2.62	1	1	6.14355	7	2	2	8.09566	7	2	3	5.93288	7	2	2	2.27489	2.33	1	1	6.22102	6.71	2	2	6.18926	6.41	2	2	3.02123	3.79	1	1	12.8191	3.79	1	4	11.6018	6.41	3	4	6.98971
F1NY25	Aconitate hydratase OS=Gallus gallus GN=ACO1 PE=3 SV=1 - [F1NY25_CHICK]	889	98.0255	7.32764	7	2	3	18	8.33734	4.27	3	3	3.38336	1.69	1	1	5.5522	2.7	2	2	2.34341	1.69	1	1	4.47615	2.7	2	2	5.32811	2.7	2	2	4.23052	1.69	1	1	0	0	0	0	7.05072	1.69	1	2	3.80705	1.69	1	1	3.67993
P34065	Proteasome subunit beta type-5 (Fragment) OS=Gallus gallus GN=PSMB5 PE=2 SV=2 - [PSB5_CHICK]	256	27.0277	8.67529	1	3	3	12	7.53069	15.63	3	3	2.85117	5.47	1	1	5.52468	10.16	2	2	6.06247	5.47	1	2	3.10483	5.47	1	1	5.53494	10.16	2	2	0	0	0	0	0	0	0	0	0	0	0	0	0	0	0	0	3.10201
R4GMB6	Farnesyl pyrophosphate synthase OS=Gallus gallus GN=FDPS PE=3 SV=2 - [R4GMB6_CHICK]	354	40.4245	5.8208	3	3	3	11	5.3332	6.21	2	2	5.88239	3.39	1	2	5.44128	6.21	2	2	2.20192	3.39	1	1	5.65389	3.39	1	2	5.27144	8.47	2	2	0	0	0	0	0	0	0	0	0	0	0	0	0	0	0	0	0
A0A1L1RZP1	Uncharacterized protein OS=Gallus gallus GN=RPS2 PE=3 SV=1 - [A0A1L1RZP1_CHICK]	184	19.8566	10.1255	17	1	2	20	2.3035	5.98	1	1	11.4126	9.24	1	3	5.17418	15.22	2	2	3.04381	9.24	1	1	2.21252	5.98	1	1	6.32633	15.22	2	2	3.99475	9.24	1	1	7.73401	5.98	1	3	2.13275	5.98	1	1	8.10348	15.22	2	3	2.61353
R4GH86	Uncharacterized protein OS=Gallus gallus PE=4 SV=2 - [R4GH86_CHICK]	95	11.0676	6.29053	1	2	2	16	2.81062	11.58	1	1	8.06398	23.16	2	3	5.52937	11.58	1	2	5.60305	23.16	2	2	0	0	0	0	5.17152	23.16	2	2	0	0	0	0	0	0	0	0	0	0	0	0	0	0	0	0	11.6506
F1NT88	Uncharacterized protein OS=Gallus gallus GN=LOC427491 PE=4 SV=2 - [F1NT88_CHICK]	431	46.6363	8.47021	1	1	1	14	5.49274	3.25	1	2	4.64279	3.25	1	2	5.24097	3.25	1	2	2.11086	3.25	1	1	0	0	0	0	4.40184	3.25	1	2	2.25184	3.25	1	1	2.08389	3.25	1	1	0	0	0	0	0	0	0	0	2.61241
A0A1L1S0R4	Uncharacterized protein OS=Gallus gallus GN=TCP1 PE=3 SV=1 - [A0A1L1S0R4_CHICK]	261	28.5998	5.75732	2	2	3	13	2.46852	4.21	1	1	4.93099	4.21	1	2	8.50343	14.94	3	3	2.67039	4.21	1	1	2.5216	4.21	1	1	2.69236	4.21	1	1	2.93846	4.21	1	1	0	0	0	0	2.31621	4.21	1	1	5.46467	4.21	1	2	0
A0A1D5PH32	Gelsolin OS=Gallus gallus GN=GSN PE=4 SV=1 - [A0A1D5PH32_CHICK]	744	82.4113	6.18896	5	4	4	10	4.9795	3.23	2	2	5.58614	3.63	2	2	4.61749	1.61	1	2	2.1407	1.61	1	1	2.39676	1.61	1	1	2.0641	1.61	1	1	0	0	0	0	0	0	0	0	0	0	0	0	0	0	0	0	2.00452
F1NP51	Lamin-B2 OS=Gallus gallus GN=LMNB2 PE=3 SV=2 - [F1NP51_CHICK]	600	67.9105	5.2749	2	2	2	10	10.127	2.33	1	3	5.52276	2.33	1	2	2.29861	2.33	1	1	0	0	0	0	2.25541	2.33	1	1	2.80088	2.33	1	1	0	0	0	0	0	0	0	0	0	0	0	0	0	0	0	0	5.27695
E1BTT8	L-lactate dehydrogenase OS=Gallus gallus GN=LDHA PE=3 SV=2 - [E1BTT8_CHICK]	332	36.4792	7.89893	3	4	4	11	5.29447	3.01	1	2	5.48046	3.01	1	2	6.44132	7.83	2	2	0	0	0	0	0	0	0	0	0	0	0	0	0	0	0	0	0	0	0	0	0	0	0	0	0	0	0	0	5.38219
A0A1L1S091	Uncharacterized protein OS=Gallus gallus GN=PEBP1 PE=4 SV=1 - [A0A1L1S091_CHICK]	181	20.3043	7.44482	3	3	3	22	8.29122	18.78	2	2	2.5873	7.73	1	1	6.77576	18.78	2	2	12.3552	17.13	2	3	18.35	18.78	2	5	12.0952	24.86	3	4	0	0	0	0	2.23609	6.08	1	1	0	0	0	0	0	0	0	0	8.6137
E1C155	Uncharacterized protein OS=Gallus gallus GN=ALDH6A1 PE=4 SV=2 - [E1C155_CHICK]	506	54.9338	6.72705	4	1	2	17	9.10696	2.17	1	3	3.02969	2.17	1	1	3.01263	2.17	1	1	7.47885	2.17	1	3	11.449	2.17	1	4	8.16063	2.17	1	3	2.25096	2.17	1	1	0	0	0	0	2.83292	3.75	1	1	0	0	0	0	0
F1NSC7	Uncharacterized protein OS=Gallus gallus PE=4 SV=3 - [F1NSC7_CHICK]	104	10.8013	8.47021	2	2	2	30	6.56264	22.12	2	2	6.12851	22.12	2	2	3.42428	14.42	1	1	12.9981	22.12	2	4	8.57108	22.12	2	3	6.60028	22.12	2	2	5.66936	22.12	2	2	5.71248	22.12	2	2	6.54938	22.12	2	2	10.8103	22.12	2	3	12.6079
A0A1D5PW75	Clathrin heavy chain OS=Gallus gallus GN=SLC25A1 PE=3 SV=1 - [A0A1D5PW75_CHICK]	1612	184.336	5.94775	10	1	5	29	4.96114	0.68	1	2	5.62469	0.68	1	2	2.95731	0.68	1	1	11.6109	1.36	2	4	5.99751	1.36	2	2	3.28474	0.68	1	1	2.85921	0.68	1	1	5.66142	0.68	1	2	0	0	0	0	14.1485	2.79	4	5	17.673
A0A1D5PE33	Uncharacterized protein OS=Gallus gallus GN=RAB1A PE=4 SV=1 - [A0A1D5PE33_CHICK]	205	22.6934	6.21436	94	1	3	22	5.43527	10.73	2	2	2.5032	5.37	1	1	5.34313	10.73	2	2	5.04248	10.73	2	2	4.85722	10.73	2	2	4.95213	10.73	2	2	5.3928	10.73	2	2	2.21627	5.37	1	1	2.60023	5.37	1	1	5.30921	10.73	2	2	4.64006
A0A1L1S0P1	Uncharacterized protein OS=Gallus gallus GN=PIT54 PE=4 SV=1 - [A0A1L1S0P1_CHICK]	508	54.8415	4.729	1	8	8	48	4.46054	4.72	2	2	2.64537	3.15	1	1	4.91733	4.72	2	2	4.65165	4.72	2	2	2.5691	1.57	1	1	4.24435	4.72	2	2	15.531	11.22	4	5	25.3442	11.02	4	8	21.597	12.6	5	7	15.6067	11.02	4	5	20.7446
B2X021	Mx protein (Fragment) OS=Gallus gallus GN=Mx PE=2 SV=1 - [B2X021_CHICK]	705	79.4822	7.37158	2	1	1	19	5.2195	1.56	1	2	2.7089	1.56	1	1	5.49897	1.56	1	2	5.21619	1.56	1	2	2.3745	1.56	1	1	5.5361	1.56	1	2	3.08715	1.56	1	1	5.21496	1.56	1	2	5.35732	1.56	1	2	5.11416	1.56	1	2	2.15379
F1NQR9	Uncharacterized protein OS=Gallus gallus GN=DNAH12 PE=4 SV=3 - [F1NQR9_CHICK]	3968	453.123	5.8208	2	2	2	15	2.0745	0.45	1	1	4.38605	0.45	1	2	4.46135	0.86	2	2	8.58603	0.45	1	4	2.45237	0.45	1	1	0	0	0	0	0	0	0	0	4.11595	0.45	1	2	4.37868	0.45	1	2	2.15298	0.45	1	1	0
Q5ZM49	Uncharacterized protein OS=Gallus gallus GN=E2F6 PE=2 SV=1 - [Q5ZM49_CHICK]	99	11.3583	9.64209	1	1	1	12	5.58604	15.15	1	2	3.00417	15.15	1	1	4.80836	15.15	1	2	2.96742	15.15	1	1	5.74912	15.15	1	2	4.9976	15.15	1	2	2.70844	15.15	1	1	0	0	0	0	2.7252	15.15	1	1	0	0	0	0	0
A0A1D5PLZ2	Uncharacterized protein OS=Gallus gallus GN=SERPIND1 PE=3 SV=1 - [A0A1D5PLZ2_CHICK]	488	55.7786	6.41748	1	3	3	12	3.20707	1.84	1	1	5.932	1.84	1	2	5.78376	1.84	1	2	2.5917	1.84	1	1	3.31555	1.84	1	1	7.96883	4.1	2	3	0	0	0	0	0	0	0	0	0	0	0	0	0	0	0	0	0
A0A1D5PLX3	Uncharacterized protein OS=Gallus gallus GN=CCDC88A PE=4 SV=1 - [A0A1D5PLX3_CHICK]	1318	154.994	5.60498	4	1	1	10	2.00395	0.76	1	1	4.33637	0.76	1	2	5.16694	0.76	1	2	2.27504	0.76	1	1	4.58767	0.76	1	2	4.42455	0.76	1	2	0	0	0	0	0	0	0	0	0	0	0	0	0	0	0	0	0
P70080	Tryptophan 5-hydroxylase 1 OS=Gallus gallus GN=TPH1 PE=1 SV=1 - [TPH1_CHICK]	445	51.1069	6.75635	4	1	2	20	5.49226	2.02	1	2	2.57639	2.02	1	1	5.26282	2.02	1	2	2.47793	2.02	1	1	4.71311	4.72	2	2	2.67937	2.02	1	1	8.22583	4.72	2	3	4.6497	2.7	1	2	5.11746	4.72	2	2	5.2069	4.72	2	2	0
A0A1D5P5B2	Uncharacterized protein OS=Gallus gallus GN=IVD PE=3 SV=1 - [A0A1D5P5B2_CHICK]	422	45.8163	8.14795	1	1	1	17	4.64134	2.84	1	2	2.72104	2.84	1	1	4.33379	2.84	1	2	2.33534	2.84	1	1	2.99895	2.84	1	1	4.92058	2.84	1	2	8.47562	2.84	1	3	5.70098	2.84	1	2	6.1615	2.84	1	2	2.99312	2.84	1	1	0
A0A1D5PHB7	Ras-related protein Rab-6A OS=Gallus gallus GN=RAB6A PE=4 SV=1 - [A0A1D5PHB7_CHICK]	205	23.0577	5.8335	82	1	3	16	5.05915	12.68	2	2	0	0	0	0	7.65307	12.68	2	3	2.68569	5.37	1	1	2.491	5.37	1	1	4.90796	10.73	2	2	4.85325	12.68	2	2	2.21627	5.37	1	1	2.60023	5.37	1	1	2.83002	5.37	1	1	2.33071
B9VMA9	Sodium vitamin C co-transporter 2 OS=Gallus gallus GN=SVCT2 PE=2 SV=1 - [B9VMA9_CHICK]	658	71.522	7.28369	1	1	1	21	2.12362	2.13	1	1	2.41431	2.13	1	1	7.6305	2.13	1	3	2.62932	2.13	1	1	2.24862	2.13	1	1	2.6167	2.13	1	1	5.09064	2.13	1	2	6.7863	2.13	1	3	5.37106	2.13	1	2	5.01723	2.13	1	2	7.70437
Q5ZM66	40S ribosomal protein S26 OS=Gallus gallus GN=RPS26 PE=2 SV=1 - [Q5ZM66_CHICK]	115	13.0231	11.0044	10	1	3	16	2.18621	7.83	1	1	4.86899	7.83	1	2	4.83968	22.61	2	2	2.69941	7.83	1	1	2.30125	7.83	1	1	2.47569	7.83	1	1	2.57179	7.83	1	1	2.33265	7.83	1	1	2.46939	7.83	1	1	5.84511	18.26	2	2	5.7195
A0A1D5PVQ6	Uncharacterized protein OS=Gallus gallus PE=3 SV=2 - [A0A1D5PVQ6_CHICK]	442	50.3731	5.60498	4	1	3	14	2.54586	2.04	1	1	5.40948	4.75	2	2	4.1455	4.75	2	2	5.39363	4.75	2	2	2.51823	2.04	1	1	0	0	0	0	2.59269	2.04	1	1	2.10569	2.04	1	1	2.07359	2.04	1	1	2.24363	2.04	1	1	2.17526
E1BXY6	Uncharacterized protein OS=Gallus gallus GN=GOLGA3 PE=4 SV=3 - [E1BXY6_CHICK]	1518	171.035	5.18604	1	2	2	12	5.05758	0.46	1	2	4.75893	0.46	1	2	2.53413	0.46	1	1	2.37452	0.46	1	1	2.3063	0.46	1	1	2.83124	0.46	1	1	2.94265	0.46	1	1	5.10793	1.45	2	2	0	0	0	0	0	0	0	0	2.05699
A0A1D5PD44	Uncharacterized protein OS=Gallus gallus GN=LOC107050727 PE=4 SV=1 - [A0A1D5PD44_CHICK]	164	18.4907	10.1841	15	2	3	16	2.26454	7.32	1	1	4.95281	7.32	1	2	5.81132	7.32	1	2	2.02098	7.32	1	1	3.11309	7.32	1	1	3.27578	7.32	1	1	3.18859	7.32	1	1	0	0	0	0	2.54683	7.32	1	1	2.92635	7.32	1	1	5.54084
F1NX55	Phospholipid-transporting ATPase OS=Gallus gallus GN=ATP8A1 PE=3 SV=3 - [F1NX55_CHICK]	1149	129.717	6.91748	1	2	2	8	4.80602	1.57	1	2	2.71639	1.57	1	1	4.28602	3.05	2	2	2.03663	1.57	1	1	2.18338	1.57	1	1	2.31668	1.57	1	1	0	0	0	0	0	0	0	0	0	0	0	0	0	0	0	0	0
A0A1D5NYT3	Uncharacterized protein OS=Gallus gallus GN=ANKHD1 PE=4 SV=1 - [A0A1D5NYT3_CHICK]	2431	256.54	6.06201	8	2	2	11	6.41558	1.11	2	3	4.20629	1.11	2	2	0	0	0	0	2.51482	0.62	1	1	0	0	0	0	2.31548	0.62	1	1	2.1779	0.49	1	1	0	0	0	0	2.27798	0.62	1	1	0	0	0	0	0
A0A1L1RK58	T-complex protein 1 subunit theta OS=Gallus gallus GN=CCT8 PE=3 SV=1 - [A0A1L1RK58_CHICK]	300	32.5957	5.2749	7	1	2	8	3.58285	5	1	1	5.98672	5	1	2	6.25359	5	1	2	0	0	0	0	0	0	0	0	5.71306	5	1	2	0	0	0	0	0	0	0	0	0	0	0	0	2.01317	4	1	1	0
F1NC02	Proteasome subunit alpha type OS=Gallus gallus GN=PSMA4 PE=3 SV=2 - [F1NC02_CHICK]	261	29.4792	7.32764	2	3	4	12	2.52	3.83	1	1	4.45251	7.28	2	2	4.60432	6.51	2	2	0	0	0	0	0	0	0	0	2.02951	3.83	1	1	2.09227	3.45	1	1	0	0	0	0	0	0	0	0	0	0	0	0	2.17552
A0A1D5P4W4	Uncharacterized protein OS=Gallus gallus GN=HYDIN PE=4 SV=1 - [A0A1D5P4W4_CHICK]	4269	473.688	5.85889	2	4	4	8	2.29395	0.37	1	1	4.06549	0.61	2	2	4.06034	0.75	2	2	0	0	0	0	0	0	0	0	2.36324	0.37	1	1	2.10123	0.37	1	1	0	0	0	0	0	0	0	0	0	0	0	0	2.56172
F1NWX6	Plasminogen OS=Gallus gallus GN=PLG PE=3 SV=2 - [F1NWX6_CHICK]	802	90.7055	7.6499	1	7	7	9	6.25735	3.37	3	3	0	0	0	0	4.25263	2.62	2	2	0	0	0	0	2.17834	1	1	1	0	0	0	0	0	0	0	0	0	0	0	0	0	0	0	0	0	0	0	0	11.16
A0A1D5PAE4	Uncharacterized protein OS=Gallus gallus GN=HDGF PE=4 SV=1 - [A0A1D5PAE4_CHICK]	232	26.2317	5.16064	1	3	3	7	2.26722	4.74	1	1	3.62272	6.9	1	1	7.31745	11.64	2	3	0	0	0	0	3.12628	6.9	1	1	0	0	0	0	0	0	0	0	0	0	0	0	0	0	0	0	0	0	0	0	2.17246
F6RS71	Uncharacterized protein OS=Gallus gallus GN=LCP1 PE=4 SV=1 - [F6RS71_CHICK]	624	69.6905	5.2876	1	1	2	6	4.28057	3.53	2	2	4.01537	3.53	2	2	2.39562	1.6	1	1	0	0	0	0	0	0	0	0	2.41188	1.6	1	1	0	0	0	0	0	0	0	0	0	0	0	0	0	0	0	0	0
F1NBL0	Mucin-6 (Fragment) OS=Gallus gallus GN=MUC6 PE=1 SV=1 - [MUC6_CHICK]	1185	132.127	6.1001	2	1	1	6	4.22224	1.27	1	2	4.66634	1.27	1	2	2.25405	1.27	1	1	0	0	0	0	0	0	0	0	2.32755	1.27	1	1	0	0	0	0	0	0	0	0	0	0	0	0	0	0	0	0	0
F1NVK1	Uncharacterized protein OS=Gallus gallus GN=DNAH9 PE=4 SV=3 - [F1NVK1_CHICK]	4210	481.503	5.60498	1	1	4	8	2.09239	0.29	1	1	4.25306	0.74	2	2	4.76927	0.38	1	2	0	0	0	0	0	0	0	0	0	0	0	0	2.62139	0.36	1	1	0	0	0	0	0	0	0	0	2.032	0.29	1	1	0
A0A1D5NTU6	Protein argonaute-2 OS=Gallus gallus GN=AGO2 PE=3 SV=1 - [A0A1D5NTU6_CHICK]	848	96.3573	9.12939	1	2	2	5	2.19149	1.53	1	1	7.63332	2.83	2	3	2.26561	1.53	1	1	0	0	0	0	0	0	0	0	0	0	0	0	0	0	0	0	0	0	0	0	0	0	0	0	0	0	0	0	0
A0A1D5PTH5	Uncharacterized protein OS=Gallus gallus GN=PPL PE=4 SV=1 - [A0A1D5PTH5_CHICK]	1689	197.128	5.77002	2	5	5	20	2.38136	0.65	1	1	0	0	0	0	6.75013	0.65	1	3	6.29349	1.24	2	3	8.69689	1.54	2	4	4.33663	1.24	2	2	0	0	0	0	0	0	0	0	2.30872	0.59	1	1	4.06596	1.24	2	2	6.11125
A0A1L1RUT1	Uncharacterized protein OS=Gallus gallus GN=COPB2 PE=4 SV=1 - [A0A1L1RUT1_CHICK]	525	59.0973	5.70654	9	2	2	22	5.35195	3.62	2	2	2.53783	1.71	1	1	2.47982	1.71	1	1	5.48115	1.9	1	2	8.79764	3.62	2	3	7.5112	3.62	2	3	3.08159	1.9	1	1	0	0	0	0	3.00856	1.9	1	1	6.30801	1.9	1	2	6.13278
A0A1L1RPG7	Uncharacterized protein OS=Gallus gallus GN=RPL11 PE=3 SV=1 - [A0A1L1RPG7_CHICK]	168	18.831	9.83252	14	3	3	21	3.76876	8.33	1	1	4.15316	8.33	1	1	7.61231	8.33	1	2	9.66819	12.5	2	3	8.51511	12.5	2	3	3.52149	8.33	1	1	7.51844	20.83	3	3	6.92512	8.33	1	2	3.95113	8.33	1	1	4.1096	8.33	1	1	4.07582
P00940	Triosephosphate isomerase OS=Gallus gallus GN=TPI1 PE=1 SV=2 - [TPIS_CHICK]	248	26.6038	7.1958	1	2	2	11	4.58616	5.24	1	2	2.26045	5.24	1	1	3.07231	4.84	1	1	0	0	0	0	12.2238	10.08	2	4	7.71045	5.24	1	3	0	0	0	0	0	0	0	0	0	0	0	0	0	0	0	0	0
A0A1D5PB54	Uncharacterized protein OS=Gallus gallus PE=4 SV=1 - [A0A1D5PB54_CHICK]	3061	349.279	4.85596	1	5	6	13	4.84835	0.49	1	2	2.19534	0.46	1	1	2.13142	0.46	1	1	9.18223	1.27	3	4	4.70046	0.49	1	2	0	0	0	0	0	0	0	0	0	0	0	0	2.07324	0.36	1	1	0	0	0	0	2.33132
Q5ZI97	Uncharacterized protein OS=Gallus gallus GN=SPATA2 PE=2 SV=1 - [Q5ZI97_CHICK]	523	60.0176	8.41162	1	1	1	15	2.07767	2.68	1	1	2.34598	2.68	1	1	4.21088	2.68	1	2	6.20844	2.68	1	3	2.6842	2.68	1	1	2.0712	2.68	1	1	2.07406	2.68	1	1	2.0508	2.68	1	1	2.70019	2.68	1	1	4.28796	2.68	1	2	2.06936
Q5ZJM0	Uncharacterized protein OS=Gallus gallus GN=NET1 PE=2 SV=1 - [Q5ZJM0_CHICK]	540	61.567	8.47021	1	1	1	13	2.42825	2.59	1	1	2.40612	2.59	1	1	4.4721	2.59	1	2	2.2969	2.59	1	1	4.48089	2.59	1	2	4.14297	2.59	1	2	6.91529	2.59	1	3	0	0	0	0	0	0	0	0	2.55121	2.59	1	1	0
A0A1D5PLA2	Uncharacterized protein OS=Gallus gallus GN=SORCS1 PE=4 SV=1 - [A0A1D5PLA2_CHICK]	1177	131.896	6.91748	2	2	2	11	4.53899	1.1	1	2	2.21589	1.1	1	1	2.07338	1.02	1	1	4.82165	1.1	1	2	4.20291	2.12	2	2	2.20687	1.1	1	1	2.11729	1.1	1	1	0	0	0	0	0	0	0	0	0	0	0	0	0
Q8JG64	Protein disulfide-isomerase A3 OS=Gallus gallus GN=PDIA3 PE=2 SV=1 - [PDIA3_CHICK]	505	56.1465	6.02393	1	2	2	9	0	0	0	0	0	0	0	0	10.6629	4.55	2	4	2.32909	2.18	1	1	5.32251	2.18	1	2	5.12928	2.18	1	2	0	0	0	0	0	0	0	0	0	0	0	0	0	0	0	0	0
F1N8D4	Uncharacterized protein OS=Gallus gallus GN=FLNB PE=4 SV=3 - [F1N8D4_CHICK]	2555	273.787	5.66846	3	2	2	19	2.52197	0.63	1	1	2.3584	0.63	1	1	5.40762	0.63	1	2	4.56323	0.63	1	2	2.44326	0.63	1	1	2.52102	0.63	1	1	9.07183	1.21	2	4	5.23191	0.63	1	2	2.34775	0.63	1	1	4.64304	1.21	2	2	2.02799
E1C4E9	Uncharacterized protein OS=Gallus gallus GN=SOGA1 PE=4 SV=3 - [E1C4E9_CHICK]	1513	170.361	6.41748	1	1	1	19	4.46829	0.93	1	2	2.29558	0.93	1	1	2.54748	0.93	1	1	2.77476	0.93	1	1	5.44222	0.93	1	2	2.53613	0.93	1	1	5.33739	0.93	1	2	2.63313	0.93	1	1	7.44882	0.93	1	3	5.14352	0.93	1	2	2.27064
A0A1D5PAQ0	Uncharacterized protein OS=Gallus gallus PE=4 SV=1 - [A0A1D5PAQ0_CHICK]	114	12.1909	9.29053	3	1	2	17	2.41673	6.14	1	1	4.42331	15.79	2	2	2.391	6.14	1	1	2.11333	9.65	1	1	4.25858	9.65	1	2	2.0322	6.14	1	1	0	0	0	0	9.44513	9.65	1	3	5.91392	9.65	1	2	4.0459	9.65	1	1	4.24273
A0A1L1RZ04	Uncharacterized protein OS=Gallus gallus GN=KRT6A PE=3 SV=1 - [A0A1L1RZ04_CHICK]	521	56.8546	8.26514	5	1	2	17	3.94408	2.3	1	1	6.33737	4.61	2	2	3.90441	2.3	1	1	6.55422	4.61	2	2	3.58245	2.3	1	1	3.6209	2.3	1	1	3.14508	2.3	1	1	3.79571	2.3	1	1	7.6253	2.3	1	2	3.45732	2.3	1	1	8.3252
A0A1D5NXC5	Uncharacterized protein OS=Gallus gallus GN=DAB2IP PE=4 SV=1 - [A0A1D5NXC5_CHICK]	1138	127.914	8.68994	2	3	3	12	5.72495	1.67	1	2	3.19589	1.67	1	1	2.04395	0.97	1	1	0	0	0	0	6.8038	2.81	2	3	2.71892	1.67	1	1	5.46332	1.67	1	2	0	0	0	0	0	0	0	0	2.6538	1.67	1	1	2.9714
E1C777	Uncharacterized protein OS=Gallus gallus GN=LOC418667 PE=4 SV=3 - [E1C777_CHICK]	298	34.4633	7.56201	1	1	2	11	2.45359	4.03	1	1	4.73073	9.06	2	2	2.0125	5.03	1	1	2.18684	5.03	1	1	4.62694	9.06	2	2	2.01664	4.03	1	1	4.39896	9.06	2	2	0	0	0	0	0	0	0	0	2.186	4.03	1	1	0
A0A1L1RSI7	Uncharacterized protein OS=Gallus gallus PE=4 SV=1 - [A0A1L1RSI7_CHICK]	232	24.8833	5.90967	2	1	1	10	4.59611	5.17	1	2	2.25778	5.17	1	1	2.06354	5.17	1	1	2.383	5.17	1	1	2.32362	5.17	1	1	4.21196	5.17	1	2	4.34964	5.17	1	2	0	0	0	0	0	0	0	0	0	0	0	0	0
A0A1D6UPQ5	Glutamate receptor metabotropic 1 isoform f transcript variant 1 OS=Gallus gallus GN=GRM1 PE=2 SV=1 - [A0A1D6UPQ5_CHICK]	898	100.143	8.03076	3	1	2	10	0	0	0	0	4.2047	1.56	1	3	2.1116	1.56	1	1	0	0	0	0	2.06071	1.56	1	1	6.23906	3.56	2	3	0	0	0	0	0	0	0	0	2.77598	1.56	1	1	2.01461	1.56	1	1	0
F1N843	Tyrosine-protein phosphatase non-receptor type OS=Gallus gallus GN=PTPN6 PE=3 SV=2 - [F1N843_CHICK]	604	68.3406	7.84033	1	1	1	9	2.17683	1.82	1	1	7.35033	1.82	1	3	0	0	0	0	0	0	0	0	4.58849	1.82	1	2	4.7707	1.82	1	2	2.09374	1.82	1	1	0	0	0	0	0	0	0	0	0	0	0	0	0
E1BZE1	Uncharacterized protein OS=Gallus gallus GN=AHSG PE=3 SV=1 - [E1BZE1_CHICK]	344	37.1766	6.21436	1	3	3	13	2.76051	3.2	1	1	4.85622	3.2	1	2	2.89116	3.2	1	1	0	0	0	0	10.3895	6.98	2	3	3.07576	3.78	1	1	0	0	0	0	0	0	0	0	0	0	0	0	3.89059	4.07	1	1	10.9604
A0A1D5PTH0	Uncharacterized protein OS=Gallus gallus GN=ESD PE=4 SV=1 - [A0A1D5PTH0_CHICK]	143	15.8567	6.771	5	1	1	9	2.61998	8.39	1	1	2.93769	8.39	1	1	5.51318	8.39	1	2	2.54869	8.39	1	1	5.41417	8.39	1	2	2.55316	8.39	1	1	0	0	0	0	0	0	0	0	0	0	0	0	0	0	0	0	2.85667
A0A1D5P2A7	Uncharacterized protein OS=Gallus gallus GN=RNF111 PE=4 SV=1 - [A0A1D5P2A7_CHICK]	993	108.441	7.34229	1	1	2	31	2.13113	1.11	1	1	4.52682	1.11	1	2	2.18662	1.11	1	1	2.38362	1.11	1	1	0	0	0	0	4.74757	1.11	1	2	5.01516	1.11	1	2	20.3772	1.91	2	9	2.42754	1.11	1	1	6.51772	1.11	1	3	13.651
A0A1D5NU89	Uncharacterized protein OS=Gallus gallus PE=4 SV=1 - [A0A1D5NU89_CHICK]	216	24.3671	5.90967	3	1	1	16	7.44697	7.41	1	2	3.99433	7.41	1	1	3.79215	7.41	1	1	0	0	0	0	8.66812	7.41	1	2	4.55123	7.41	1	1	13.1299	7.41	1	3	3.13222	7.41	1	1	7.51314	7.41	1	2	12.0518	7.41	1	3	0
A0A1D5P4L5	Uncharacterized protein OS=Gallus gallus PE=3 SV=1 - [A0A1D5P4L5_CHICK]	101	11.2379	9.84717	1	1	1	13	2.4648	7.92	1	1	2.45554	7.92	1	1	5.05395	7.92	1	2	4.43944	7.92	1	2	0	0	0	0	2.73643	7.92	1	1	2.90957	7.92	1	1	2.5611	7.92	1	1	2.77103	7.92	1	1	2.74114	7.92	1	1	2.89916
A0A1L1RN27	Uncharacterized protein OS=Gallus gallus GN=KRT75L4 PE=3 SV=1 - [A0A1L1RN27_CHICK]	547	61.3736	6.87354	2	1	3	13	4.60101	3.11	2	2	2.4393	1.65	1	1	2.0889	1.65	1	1	2.26936	1.65	1	1	4.5335	3.84	2	2	0	0	0	0	2.59269	1.65	1	1	2.10569	1.65	1	1	2.07359	1.65	1	1	2.24363	1.65	1	1	2.17526
Q805B1	Tumor necrosis factor receptor associated factor-5 OS=Gallus gallus GN=TRAF-5 PE=2 SV=1 - [Q805B1_CHICK]	557	64.3151	7.56201	2	1	2	12	2.06517	1.26	1	1	2.32407	1.26	1	1	4.51435	3.95	2	2	2.30614	1.26	1	1	2.39559	1.26	1	1	2.26381	1.26	1	1	2.18378	1.26	1	1	2.21777	1.26	1	1	2.19904	1.26	1	1	2.20694	1.26	1	1	2.24026
A0A1D5PHS4	Uncharacterized protein OS=Gallus gallus GN=GRIK1 PE=3 SV=1 - [A0A1D5PHS4_CHICK]	859	97.0331	5.93506	4	1	1	12	4.61578	1.63	1	2	2.6771	1.63	1	1	2.68293	1.63	1	1	2.43607	1.63	1	1	2.39331	1.63	1	1	2.17739	1.63	1	1	2.67643	1.63	1	1	2.24393	1.63	1	1	0	0	0	0	2.15465	1.63	1	1	2.38687
A0A1L1RVY1	Uncharacterized protein OS=Gallus gallus GN=MCEE PE=4 SV=1 - [A0A1L1RVY1_CHICK]	173	18.7351	8.5874	1	1	1	12	2.86135	8.67	1	1	2.98331	8.67	1	1	6.08646	8.67	1	2	2.65732	8.67	1	1	2.52188	8.67	1	1	3.11311	8.67	1	1	2.57078	8.67	1	1	0	0	0	0	2.32473	8.67	1	1	5.85352	8.67	1	2	0
A0A1D5P3K1	Uncharacterized protein OS=Gallus gallus PE=4 SV=2 - [A0A1D5P3K1_CHICK]	1980	213.766	5.07178	1	2	2	9	2.19438	0.86	1	1	4.60246	0.86	1	2	2.1265	0.86	1	1	2.39229	0.86	1	1	2.0606	0.86	1	1	2.4231	0.86	1	1	2.06924	0.86	1	1	2.01972	0.4	1	1	0	0	0	0	0	0	0	0	0
A0A1D5P7S6	Uncharacterized protein OS=Gallus gallus PE=4 SV=2 - [A0A1D5P7S6_CHICK]	692	77.0124	8.11865	1	1	1	11	2.55115	1.45	1	1	3.03041	1.45	1	1	5.32397	1.45	1	2	3.03088	1.45	1	1	2.5151	1.45	1	1	3.08774	1.45	1	1	2.53162	1.45	1	1	0	0	0	0	0	0	0	0	2.96981	1.45	1	1	2.87445
E1BQC5	Poly [ADP-ribose] polymerase OS=Gallus gallus PE=4 SV=4 - [E1BQC5_CHICK]	1671	187.219	6.55127	1	3	4	10	4.13933	0.66	1	2	2.04876	0.66	1	1	2.24848	0.66	1	1	2.20359	0.66	1	1	0	0	0	0	4.3289	1.56	2	2	0	0	0	0	0	0	0	0	2.40855	0.66	1	1	2.10292	0.48	1	1	2.20431
A0A1D5PHG8	Uncharacterized protein OS=Gallus gallus PE=4 SV=1 - [A0A1D5PHG8_CHICK]	6704	770.282	5.31299	5	5	5	9	2.10088	0.16	1	1	0	0	0	0	6.36775	0.64	3	3	2.07484	0.12	1	1	0	0	0	0	4.04833	0.28	2	2	0	0	0	0	0	0	0	0	2.07204	0.19	1	1	0	0	0	0	0
A0A1D5PFQ7	Phosphotransferase OS=Gallus gallus GN=Gga.48051 PE=3 SV=1 - [A0A1D5PFQ7_CHICK]	465	52.2206	5.45264	2	1	1	9	2.0497	3.66	1	1	4.08241	3.66	1	2	2.11289	3.66	1	1	2.0502	3.66	1	1	2.25032	3.66	1	1	2.12869	3.66	1	1	2.41531	3.66	1	1	0	0	0	0	0	0	0	0	0	0	0	0	2.11857
A0A1D5PHE8	Uncharacterized protein OS=Gallus gallus GN=LEO1 PE=4 SV=1 - [A0A1D5PHE8_CHICK]	657	74.7279	4.55127	1	1	1	9	2.46003	1.83	1	1	4.46667	1.83	1	2	2.30877	1.83	1	1	2.08223	1.83	1	1	2.01294	1.83	1	1	2.37911	1.83	1	1	2.27784	1.83	1	1	0	0	0	0	0	0	0	0	0	0	0	0	2.08246
A0A1D5P4L6	Uncharacterized protein OS=Gallus gallus GN=ITIH3 PE=4 SV=1 - [A0A1D5P4L6_CHICK]	838	93.7536	6.23975	5	4	4	9	3.53475	1.91	1	1	6.82103	1.91	1	2	4.09149	1.91	1	1	0	0	0	0	2.27037	1.31	1	1	5.38867	2.98	2	2	0	0	0	0	0	0	0	0	2.51574	1.31	1	1	2.24667	1.55	1	1	0
A0A1D5PKF3	Uncharacterized protein OS=Gallus gallus GN=LRP4 PE=4 SV=1 - [A0A1D5PKF3_CHICK]	1890	210.689	5.17334	1	2	2	8	2.24363	0.63	1	1	2.10669	0.63	1	1	4.1051	1.38	2	2	2.10178	0.63	1	1	2.14183	0.63	1	1	2.003	0.63	1	1	0	0	0	0	0	0	0	0	2.0508	0.63	1	1	0	0	0	0	0
A0A1D5PCU0	V-type proton ATPase subunit a OS=Gallus gallus GN=ATP6V0A4 PE=3 SV=1 - [A0A1D5PCU0_CHICK]	842	96.516	6.354	1	1	1	8	2.53932	1.78	1	1	4.34201	1.78	1	2	2.22289	1.78	1	1	0	0	0	0	4.66382	1.78	1	2	2.13893	1.78	1	1	2.10729	1.78	1	1	0	0	0	0	0	0	0	0	0	0	0	0	0
E1C2S1	Talin-1 OS=Gallus gallus GN=TLN1 PE=4 SV=2 - [E1C2S1_CHICK]	2541	271.748	6.22705	3	3	4	9	0	0	0	0	7.81519	0.47	1	3	3.22048	0.47	1	1	0	0	0	0	5.36325	1.34	2	2	2.16311	0.67	1	1	0	0	0	0	0	0	0	0	0	0	0	0	0	0	0	0	0
F1NL76	Uncharacterized protein OS=Gallus gallus PE=4 SV=4 - [F1NL76_CHICK]	1302	143.97	5.71924	2	2	2	9	3.28427	1.15	1	1	3.30015	1.15	1	1	4.79856	2.15	2	2	3.54236	1.15	1	1	3.59509	1.15	1	1	2.75141	1.15	1	1	0	0	0	0	0	0	0	0	0	0	0	0	2.63388	1.15	1	1	0
A0A1L1S0K9	Proteasome subunit alpha type OS=Gallus gallus GN=PSMA7 PE=3 SV=1 - [A0A1L1S0K9_CHICK]	231	25.7695	7.85498	4	1	2	7	3.65143	6.49	1	1	7.47743	6.49	1	2	3.45951	6.49	1	1	0	0	0	0	2.09876	6.06	1	1	7.34252	6.49	1	2	0	0	0	0	0	0	0	0	0	0	0	0	0	0	0	0	0
H9L0X6	Uncharacterized protein OS=Gallus gallus GN=OASL PE=4 SV=2 - [H9L0X6_CHICK]	476	54.231	8.1333	1	1	1	7	2.8858	2.73	1	1	5.92931	2.73	1	2	3.10766	2.73	1	1	0	0	0	0	5.56635	2.73	1	2	2.92099	2.73	1	1	0	0	0	0	0	0	0	0	0	0	0	0	0	0	0	0	0
[truncated: 404 more rows]
[truncated: 11 more columns]

## Sheet: Column description
Column description
Accession	Identifier for the protein (Uniprot accession)
Description	Protein name
[truncated: 17 more rows]
